# Supplementary material for: A Simple and Efficient Multicomponent Synthesis of Novel Pyrazole, N-aminopyridine and Pyrazolo[3,4-b]Pyridine Derivatives in Water
Source: Preprints.org preprint supplement (doi:10.20944/preprints202312.1232.v1), 2023-12-28

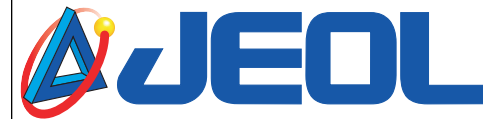

Author = delta3  
Content = 110B-DMSO-13C  
Creation\_time = 4-SEP-2023 21:1  
Current\_time = 5-SEP-2023 13:1  
Data\_format = 1D REAL  
Dim\_size = 26214  
Dim\_title = 13C  
Dim\_units = [ppm]  
Dimensions = X  
Filename = 110B-DMSO-13C-6.  
Machine = scc  
Revision\_time = 5-SEP-2023 13:1  
Sample\_id = 110B-DMSO-13C  
Site = ECA500 (Datum BL  
Spectrometer = DELTA2\_NMR  
Scans = 1207  
Mod\_return = 1  
Total\_scans = 1207  
X\_points = 32768  
X\_prescans = 4  
X\_domain = 13C  
X\_offset = 100[ppm]  
X\_freq = 125.76529768[MHz]  
X\_sweep = 39.3081761[kHz]  
X\_resolution = 1.19959034[Hz]  
Irr\_domain = 1H  
Irr\_offset = 5.0[ppm]  
Irr\_freq = 500.15991521[MHz]  
X\_acq\_duration = 0.83361792[s]  
Digital\_filter = TRUE  
Filter\_factor = 8  
Af\_version = 1  
Delay\_of\_start = 1.99999974[s]  
Actual\_start\_time = 4-SEP-2023 21:1  
Acq\_delay = 20.67[us]  
Digital\_filter\_status = 2P  
Clipped = FALSE  
Dc\_balanced = FALSE  
X90 = 9[us]  
Irr90 = 10.50092[us]  
Tri90 = 10[us]  
Qua90 = 10[us]  
Qui90 = 10[us]  
Sex90 = 10[us]  
Sep90 = 10[us]  
Oct90 = 10[us]  
Non90 = 10[us]  
Dec90 = 10[us]  
X90\_hi = 0.118[ms]  
Irr90\_hi = 92[us]  
Tri90\_hi = 10[us]  
Qua90\_hi = 10[us]  
Qui90\_hi = 10[us]  
Sex90\_hi = 10[us]  
Sep90\_hi = 10[us]  
Oct90\_hi = 10[us]  
Non90\_hi = 10[us]  
Dec90\_hi = 10[us]  
X90\_lo = 0.118[ms]  
Irr90\_lo = 92[us]  
Tri90\_lo = 10[us]  
Qua90\_lo = 10[us]  
Qui90\_lo = 10[us]  
Sex90\_lo = 10[us]  
Sep90\_lo = 10[us]  
Oct90\_lo = 10[us]  
Non90\_lo = 10[us]  
Dec90\_lo = 10[us]  
X90\_spin = 1[us]  
Irr90\_spin = 38[us]

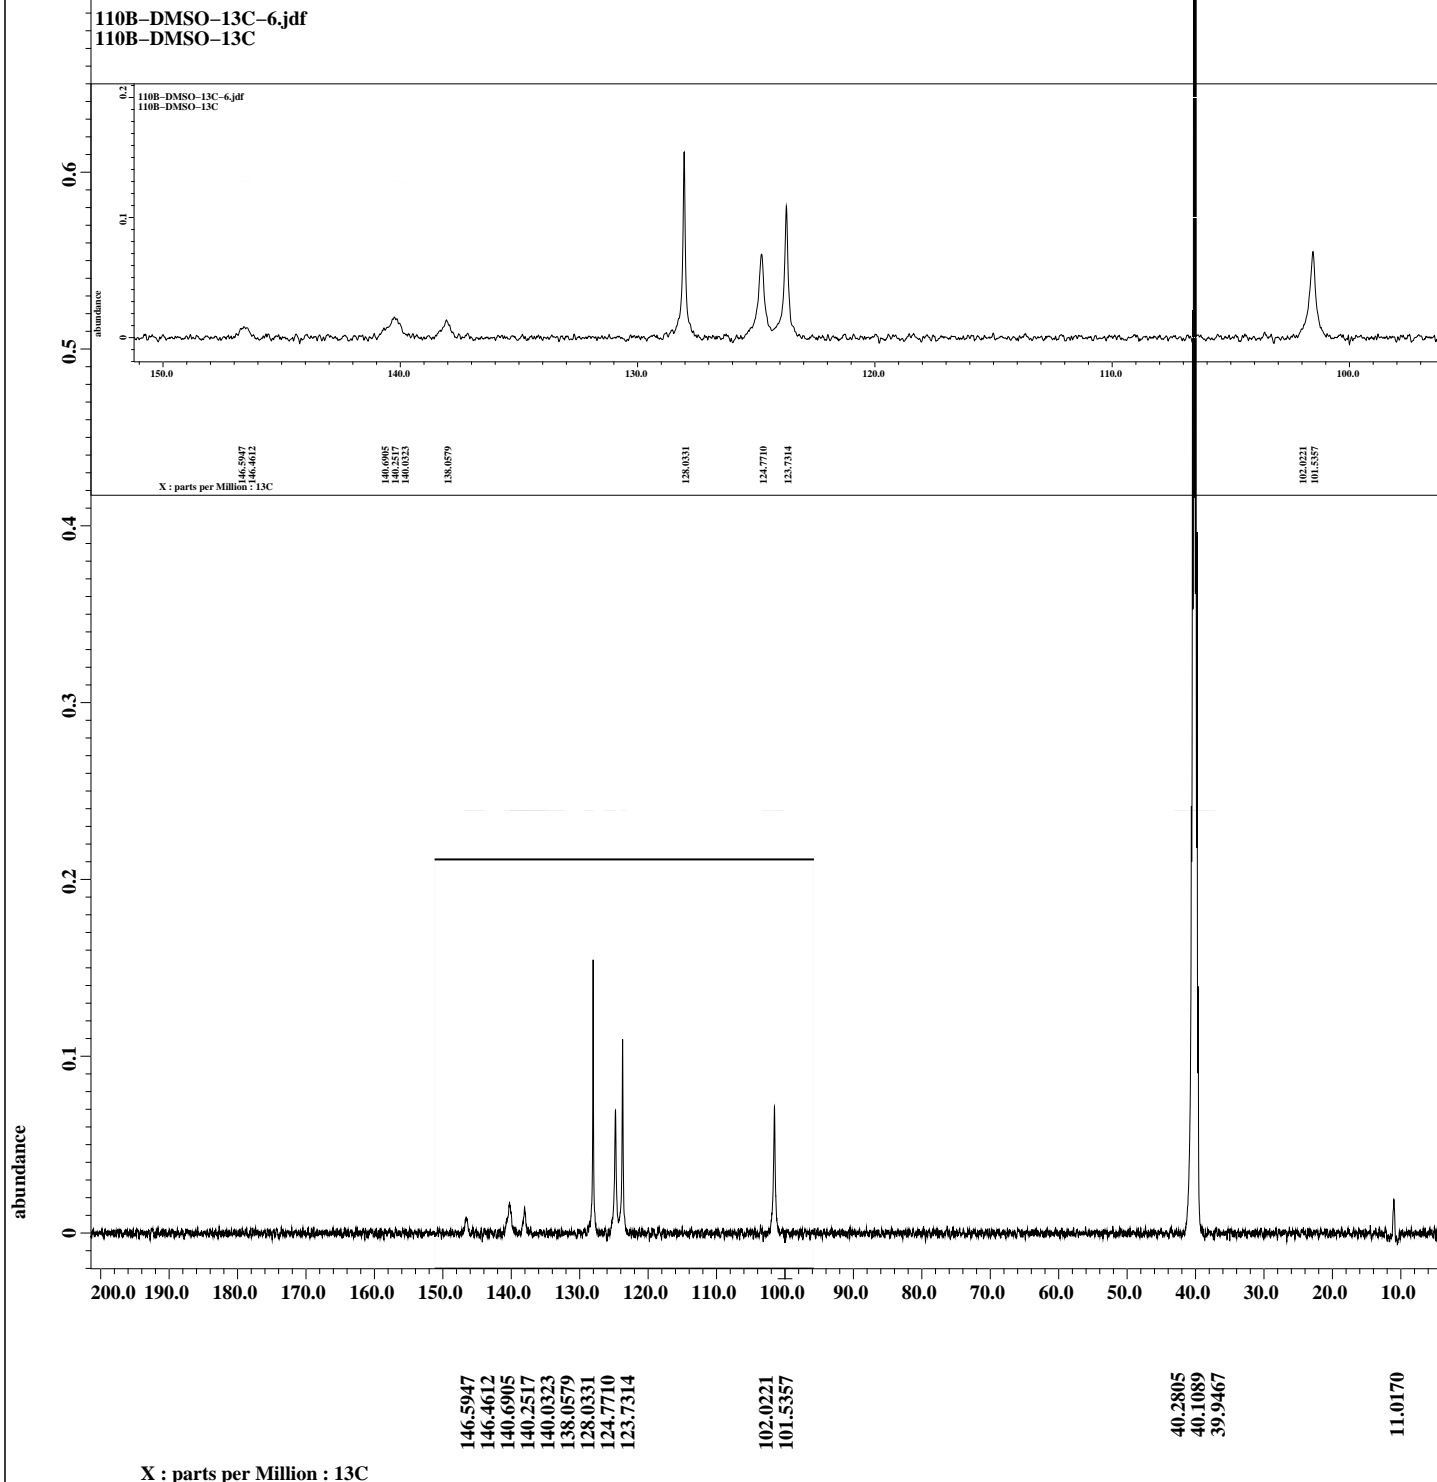

Supplement: Supplementary file 5 [file supplementary]
