# Supplementary material for: A Simple and Efficient Multicomponent Synthesis of Novel Pyrazole, N-aminopyridine and Pyrazolo[3,4-b]Pyridine Derivatives in Water
Source: Preprints.org preprint supplement (doi:10.20944/preprints202312.1232.v1), 2023-12-28
Supplement: Supplementary file 14 [file supplementary]

RT: 0.00 - 4.25

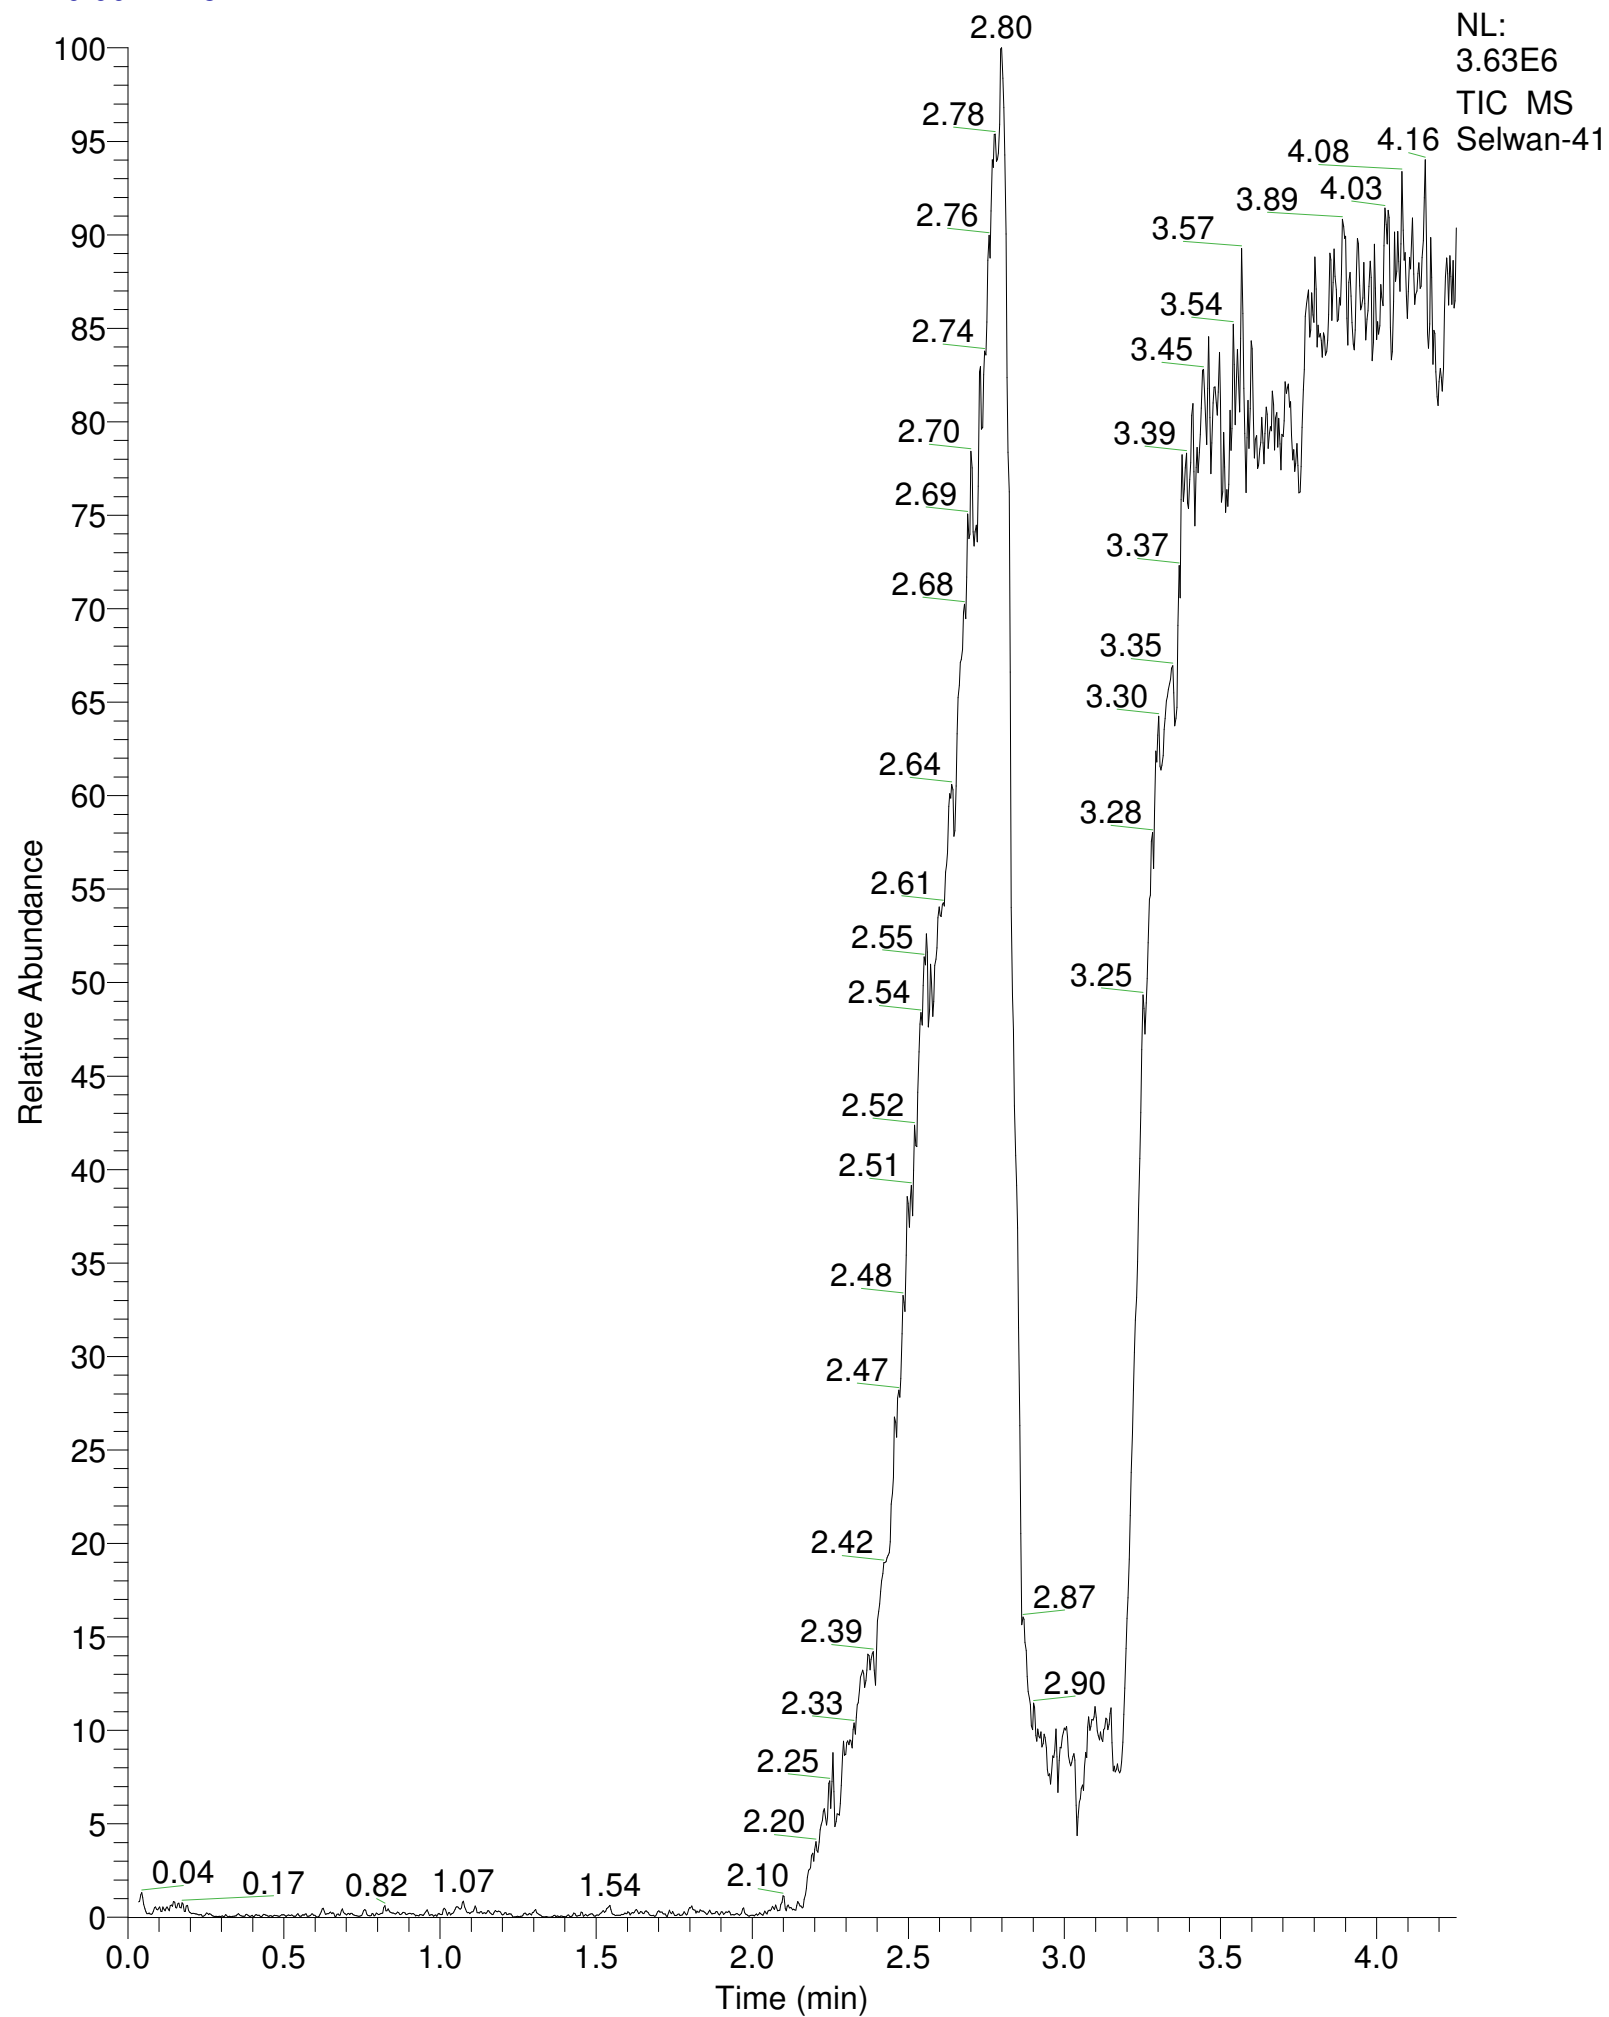

Selwan-41 #929 RT: 3.19 AV: 1 NL: 8.65E4

T: {0,0} + c EI Full ms [50.00-1000.00]

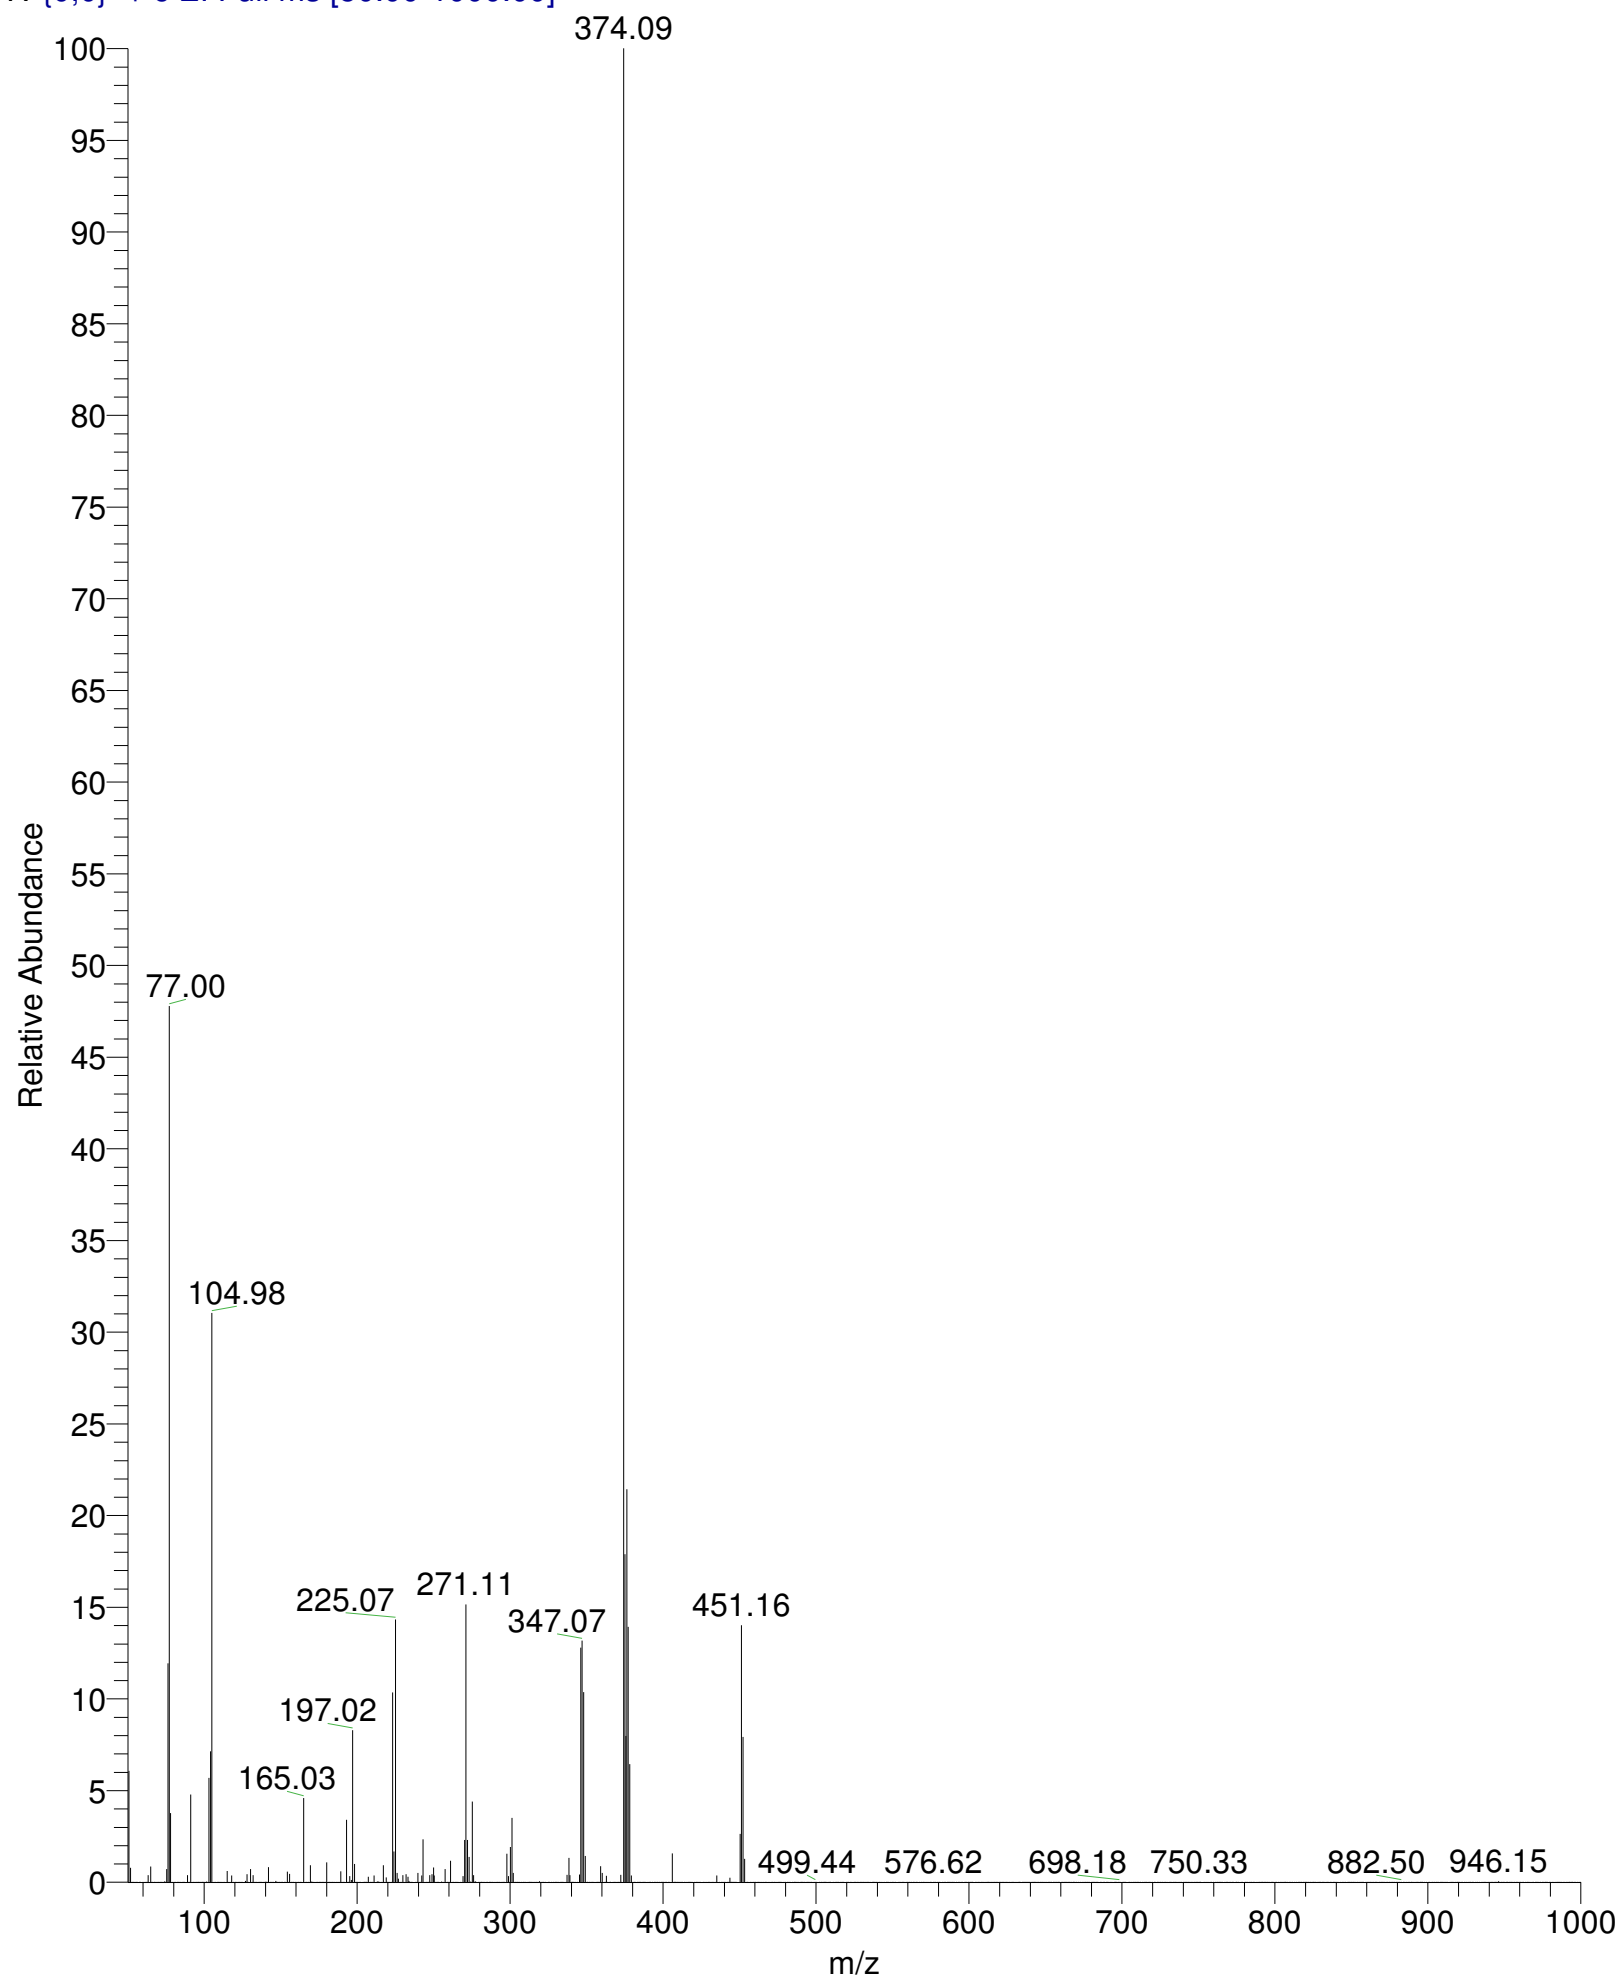

Selwan-41#929 RT: 3.19

T: {0,0} + c EI Full ms [50.00-1000.00]

m/z= 50.00-1000.04

| m/z   | Intensity | Relative |
|-------|-----------|----------|
| 50.82 | 5242.1    | 6.06     |
| 51.73 | 667.4     | 0.77     |
| 52.64 | 3.4       | 0.00     |
| 53.23 | 0.4       | 0.00     |
| 53.84 | 0.0       | 0.00     |
| 54.76 | 0.1       | 0.00     |
| 55.55 | 0.0       | 0.00     |
| 56.23 | 0.3       | 0.00     |
| 57.62 | 0.3       | 0.00     |
| 58.30 | 0.2       | 0.00     |
| 59.86 | 0.1       | 0.00     |
| 61.15 | 14.3      | 0.02     |
| 62.08 | 0.3       | 0.00     |
| 62.62 | 0.0       | 0.00     |
| 63.24 | 319.4     | 0.37     |
| 64.89 | 735.2     | 0.85     |
| 65.55 | 2.3       | 0.00     |
| 66.24 | 0.3       | 0.00     |
| 67.23 | 0.3       | 0.00     |
| 67.77 | 0.0       | 0.00     |
| 68.48 | 0.0       | 0.00     |
| 69.56 | 0.2       | 0.00     |
| 70.13 | 0.1       | 0.00     |
| 70.95 | 0.0       | 0.00     |
| 71.58 | 0.0       | 0.00     |
| 72.31 | 0.0       | 0.00     |
| 73.06 | 2.3       | 0.00     |
| 74.14 | 39.9      | 0.05     |
| 75.40 | 611.9     | 0.71     |
| 76.28 | 10326.0   | 11.94    |
| 77.00 | 41334.1   | 47.78    |
| 78.01 | 3256.5    | 3.76     |
| 79.08 | 0.2       | 0.00     |
| 80.14 | 0.1       | 0.00     |
| 81.08 | 0.0       | 0.00     |
| 82.35 | 0.1       | 0.00     |
| 83.00 | 0.0       | 0.00     |
| 83.63 | 0.0       | 0.00     |
| 84.62 | 0.0       | 0.00     |
| 85.97 | 0.0       | 0.00     |
| 86.56 | 0.0       | 0.00     |
| 87.09 | 0.0       | 0.00     |
| 88.95 | 329.9     | 0.38     |
| 89.46 | 0.2       | 0.00     |
| 90.29 | 14.9      | 0.02     |
| 91.12 | 4133.2    | 4.78     |
| 92.49 | 0.0       | 0.00     |
| 93.27 | 0.0       | 0.00     |
| 94.03 | 0.0       | 0.00     |
| 94.78 | 0.0       | 0.00     |
| 95.64 | 14.3      | 0.02     |
| 96.17 | 0.0       | 0.00     |
| 96.76 | 0.1       | 0.00     |
| 97.53 | 0.0       | 0.00     |
| 98.35 | 0.1       | 0.00     |

Selwan-41#929 RT: 3.19

T: {0,0} + c EI Full ms [50.00-1000.00]

m/z= 50.00-1000.04

| m/z    | Intensity | Relative |
|--------|-----------|----------|
| 98.92  | 0.0       | 0.00     |
| 99.55  | 0.0       | 0.00     |
| 100.28 | 0.3       | 0.00     |
| 101.27 | 16.4      | 0.02     |
| 101.99 | 11.4      | 0.01     |
| 103.04 | 4908.1    | 5.67     |
| 104.07 | 6173.8    | 7.14     |
| 104.98 | 26856.1   | 31.04    |
| 106.35 | 2.5       | 0.00     |
| 107.43 | 0.0       | 0.00     |
| 108.64 | 0.0       | 0.00     |
| 109.28 | 0.0       | 0.00     |
| 110.15 | 0.0       | 0.00     |
| 110.94 | 0.0       | 0.00     |
| 112.24 | 0.1       | 0.00     |
| 113.22 | 0.0       | 0.00     |
| 114.91 | 521.3     | 0.60     |
| 115.58 | 0.4       | 0.00     |
| 116.76 | 2.0       | 0.00     |
| 117.97 | 312.3     | 0.36     |
| 119.21 | 0.1       | 0.00     |
| 120.13 | 0.0       | 0.00     |
| 120.85 | 0.0       | 0.00     |
| 122.16 | 0.0       | 0.00     |
| 122.92 | 0.0       | 0.00     |
| 123.90 | 0.0       | 0.00     |
| 124.86 | 0.0       | 0.00     |
| 126.85 | 50.2      | 0.06     |
| 127.36 | 0.1       | 0.00     |
| 127.99 | 366.0     | 0.42     |
| 128.80 | 2.4       | 0.00     |
| 130.32 | 613.1     | 0.71     |
| 131.18 | 0.2       | 0.00     |
| 132.01 | 325.9     | 0.38     |
| 132.76 | 0.0       | 0.00     |
| 133.54 | 0.1       | 0.00     |
| 134.15 | 0.0       | 0.00     |
| 135.30 | 0.0       | 0.00     |
| 136.16 | 0.0       | 0.00     |
| 136.81 | 0.1       | 0.00     |
| 137.38 | 0.0       | 0.00     |
| 138.32 | 0.1       | 0.00     |
| 139.27 | 0.1       | 0.00     |
| 140.19 | 20.4      | 0.02     |
| 141.38 | 0.3       | 0.00     |
| 141.97 | 703.2     | 0.81     |
| 143.18 | 0.1       | 0.00     |
| 143.91 | 0.0       | 0.00     |
| 144.59 | 0.0       | 0.00     |
| 145.26 | 0.0       | 0.00     |
| 146.67 | 48.3      | 0.06     |
| 147.47 | 0.0       | 0.00     |
| 148.10 | 0.0       | 0.00     |
| 148.89 | 0.0       | 0.00     |
| 149.48 | 0.0       | 0.00     |

Selwan-41#929 RT: 3.19

T: {0,0} + c EI Full ms [50.00-1000.00]

m/z= 50.00-1000.04

| m/z    | Intensity | Relative |
|--------|-----------|----------|
| 150.48 | 0.0       | 0.00     |
| 151.08 | 0.0       | 0.00     |
| 152.46 | 1.7       | 0.00     |
| 153.02 | 0.2       | 0.00     |
| 154.19 | 483.3     | 0.56     |
| 155.02 | 0.1       | 0.00     |
| 155.84 | 379.1     | 0.44     |
| 157.11 | 0.0       | 0.00     |
| 157.89 | 0.0       | 0.00     |
| 158.43 | 0.0       | 0.00     |
| 159.60 | 0.0       | 0.00     |
| 160.65 | 0.0       | 0.00     |
| 161.67 | 0.0       | 0.00     |
| 162.62 | 0.0       | 0.00     |
| 163.30 | 0.0       | 0.00     |
| 165.03 | 3968.7    | 4.59     |
| 166.34 | 0.0       | 0.00     |
| 167.16 | 0.1       | 0.00     |
| 168.00 | 0.4       | 0.00     |
| 169.27 | 791.9     | 0.92     |
| 170.13 | 24.3      | 0.03     |
| 170.75 | 0.0       | 0.00     |
| 171.72 | 0.0       | 0.00     |
| 173.05 | 0.0       | 0.00     |
| 173.87 | 0.0       | 0.00     |
| 175.08 | 0.0       | 0.00     |
| 175.60 | 0.0       | 0.00     |
| 176.21 | 0.0       | 0.00     |
| 177.12 | 0.0       | 0.00     |
| 177.69 | 0.0       | 0.00     |
| 178.28 | 0.0       | 0.00     |
| 179.29 | 0.0       | 0.00     |
| 180.08 | 926.5     | 1.07     |
| 181.23 | 0.0       | 0.00     |
| 181.82 | 0.0       | 0.00     |
| 182.72 | 0.0       | 0.00     |
| 183.58 | 0.0       | 0.00     |
| 184.19 | 0.0       | 0.00     |
| 185.17 | 0.0       | 0.00     |
| 186.28 | 0.0       | 0.00     |
| 187.39 | 0.0       | 0.00     |
| 188.18 | 0.0       | 0.00     |
| 189.21 | 510.8     | 0.59     |
| 190.06 | 0.0       | 0.00     |
| 190.84 | 0.1       | 0.00     |
| 191.43 | 0.0       | 0.00     |
| 193.07 | 2942.1    | 3.40     |
| 193.75 | 0.0       | 0.00     |
| 194.36 | 0.0       | 0.00     |
| 195.09 | 272.3     | 0.31     |
| 196.20 | 92.4      | 0.11     |
| 197.02 | 7159.0    | 8.27     |
| 198.23 | 853.6     | 0.99     |
| 198.75 | 0.0       | 0.00     |
| 199.38 | 0.0       | 0.00     |

Selwan-41#929 RT: 3.19

T: {0,0} + c EI Full ms [50.00-1000.00]

m/z= 50.00-1000.04

| m/z    | Intensity | Relative |
|--------|-----------|----------|
| 200.16 | 0.1       | 0.00     |
| 201.11 | 0.0       | 0.00     |
| 201.97 | 0.0       | 0.00     |
| 203.81 | 0.1       | 0.00     |
| 204.61 | 0.1       | 0.00     |
| 205.18 | 0.0       | 0.00     |
| 205.70 | 0.0       | 0.00     |
| 206.23 | 0.4       | 0.00     |
| 207.31 | 249.3     | 0.29     |
| 208.40 | 0.0       | 0.00     |
| 209.18 | 0.0       | 0.00     |
| 210.02 | 0.0       | 0.00     |
| 211.04 | 313.3     | 0.36     |
| 212.76 | 0.0       | 0.00     |
| 213.50 | 37.4      | 0.04     |
| 214.02 | 11.3      | 0.01     |
| 214.76 | 0.0       | 0.00     |
| 216.07 | 0.0       | 0.00     |
| 217.13 | 795.1     | 0.92     |
| 217.65 | 0.0       | 0.00     |
| 218.95 | 220.0     | 0.25     |
| 219.64 | 0.0       | 0.00     |
| 220.25 | 0.0       | 0.00     |
| 221.22 | 0.0       | 0.00     |
| 222.35 | 0.0       | 0.00     |
| 223.09 | 8947.3    | 10.34    |
| 224.02 | 1438.9    | 1.66     |
| 225.07 | 12392.8   | 14.32    |
| 226.05 | 428.3     | 0.50     |
| 226.97 | 164.2     | 0.19     |
| 227.86 | 0.0       | 0.00     |
| 228.70 | 0.0       | 0.00     |
| 229.88 | 331.4     | 0.38     |
| 230.59 | 0.0       | 0.00     |
| 231.90 | 377.0     | 0.44     |
| 233.18 | 245.3     | 0.28     |
| 233.88 | 56.2      | 0.06     |
| 234.43 | 0.0       | 0.00     |
| 235.36 | 0.0       | 0.00     |
| 235.94 | 0.0       | 0.00     |
| 238.13 | 0.1       | 0.00     |
| 239.08 | 0.0       | 0.00     |
| 239.58 | 435.8     | 0.50     |
| 240.46 | 0.0       | 0.00     |
| 241.36 | 0.0       | 0.00     |
| 242.24 | 315.6     | 0.36     |
| 243.04 | 2021.4    | 2.34     |
| 244.19 | 0.2       | 0.00     |
| 245.35 | 0.0       | 0.00     |
| 246.06 | 0.0       | 0.00     |
| 246.67 | 0.0       | 0.00     |
| 247.36 | 320.8     | 0.37     |
| 248.05 | 0.0       | 0.00     |
| 248.88 | 375.3     | 0.43     |
| 249.85 | 683.0     | 0.79     |

Selwan-41#929 RT: 3.19

T: {0,0} + c EI Full ms [50.00-1000.00]

m/z= 50.00-1000.04

| m/z    | Intensity | Relative |
|--------|-----------|----------|
| 250.35 | 313.4     | 0.36     |
| 250.94 | 0.0       | 0.00     |
| 251.94 | 0.0       | 0.00     |
| 252.68 | 0.0       | 0.00     |
| 253.28 | 0.0       | 0.00     |
| 255.19 | 15.7      | 0.02     |
| 256.27 | 0.3       | 0.00     |
| 257.36 | 615.3     | 0.71     |
| 258.61 | 0.0       | 0.00     |
| 259.37 | 0.0       | 0.00     |
| 260.11 | 0.0       | 0.00     |
| 261.07 | 998.7     | 1.15     |
| 262.48 | 0.0       | 0.00     |
| 263.12 | 0.1       | 0.00     |
| 264.10 | 0.0       | 0.00     |
| 265.03 | 0.0       | 0.00     |
| 265.86 | 0.0       | 0.00     |
| 267.59 | 0.2       | 0.00     |
| 269.17 | 275.8     | 0.32     |
| 270.14 | 1984.1    | 2.29     |
| 271.11 | 13095.3   | 15.14    |
| 272.05 | 1985.8    | 2.30     |
| 273.16 | 1192.2    | 1.38     |
| 274.13 | 30.1      | 0.03     |
| 275.13 | 3792.0    | 4.38     |
| 276.09 | 324.9     | 0.38     |
| 277.20 | 43.6      | 0.05     |
| 277.83 | 0.0       | 0.00     |
| 279.41 | 0.0       | 0.00     |
| 280.25 | 0.0       | 0.00     |
| 281.03 | 0.0       | 0.00     |
| 281.58 | 0.0       | 0.00     |
| 282.35 | 0.1       | 0.00     |
| 283.29 | 0.0       | 0.00     |
| 284.63 | 0.0       | 0.00     |
| 285.18 | 0.0       | 0.00     |
| 286.43 | 0.0       | 0.00     |
| 287.00 | 0.0       | 0.00     |
| 287.55 | 0.0       | 0.00     |
| 288.48 | 0.0       | 0.00     |
| 289.35 | 0.0       | 0.00     |
| 290.73 | 0.1       | 0.00     |
| 291.46 | 0.0       | 0.00     |
| 292.09 | 0.0       | 0.00     |
| 293.02 | 0.0       | 0.00     |
| 294.05 | 0.0       | 0.00     |
| 295.16 | 0.0       | 0.00     |
| 295.77 | 0.0       | 0.00     |
| 296.39 | 0.1       | 0.00     |
| 297.86 | 1334.5    | 1.54     |
| 298.83 | 283.0     | 0.33     |
| 299.40 | 0.3       | 0.00     |
| 300.20 | 1651.6    | 1.91     |
| 301.15 | 3033.1    | 3.51     |
| 302.10 | 426.7     | 0.49     |

Selwan-41#929 RT: 3.19

T: {0,0} + c EI Full ms [50.00-1000.00]

m/z= 50.00-1000.04

| m/z    | Intensity | Relative |
|--------|-----------|----------|
| 303.13 | 0.0       | 0.00     |
| 303.64 | 0.0       | 0.00     |
| 304.51 | 0.1       | 0.00     |
| 305.22 | 0.0       | 0.00     |
| 305.97 | 0.0       | 0.00     |
| 307.17 | 0.0       | 0.00     |
| 308.53 | 11.4      | 0.01     |
| 309.21 | 0.0       | 0.00     |
| 310.10 | 0.0       | 0.00     |
| 311.64 | 2.1       | 0.00     |
| 312.40 | 0.0       | 0.00     |
| 312.95 | 0.0       | 0.00     |
| 313.54 | 0.0       | 0.00     |
| 314.19 | 0.0       | 0.00     |
| 315.06 | 0.0       | 0.00     |
| 316.08 | 0.1       | 0.00     |
| 316.81 | 0.0       | 0.00     |
| 317.54 | 0.1       | 0.00     |
| 318.36 | 0.0       | 0.00     |
| 319.07 | 37.1      | 0.04     |
| 320.21 | 0.2       | 0.00     |
| 321.29 | 0.2       | 0.00     |
| 321.88 | 0.1       | 0.00     |
| 322.82 | 0.1       | 0.00     |
| 324.95 | 0.0       | 0.00     |
| 325.58 | 0.0       | 0.00     |
| 327.14 | 0.2       | 0.00     |
| 328.31 | 0.1       | 0.00     |
| 329.30 | 0.0       | 0.00     |
| 329.99 | 0.0       | 0.00     |
| 330.65 | 0.1       | 0.00     |
| 331.65 | 0.0       | 0.00     |
| 332.92 | 0.1       | 0.00     |
| 333.56 | 0.0       | 0.00     |
| 334.14 | 0.0       | 0.00     |
| 335.15 | 0.0       | 0.00     |
| 336.47 | 0.0       | 0.00     |
| 337.07 | 342.2     | 0.40     |
| 338.31 | 1139.2    | 1.32     |
| 338.97 | 325.0     | 0.38     |
| 340.03 | 0.2       | 0.00     |
| 340.71 | 0.0       | 0.00     |
| 341.21 | 0.0       | 0.00     |
| 341.81 | 0.0       | 0.00     |
| 342.75 | 0.1       | 0.00     |
| 344.01 | 0.1       | 0.00     |
| 345.40 | 361.8     | 0.42     |
| 346.18 | 11061.9   | 12.79    |
| 347.07 | 11398.1   | 13.17    |
| 348.05 | 8956.9    | 10.35    |
| 349.15 | 1224.9    | 1.42     |
| 350.04 | 0.1       | 0.00     |
| 350.60 | 0.0       | 0.00     |
| 351.59 | 0.0       | 0.00     |
| 352.30 | 0.0       | 0.00     |



Selwan-41#929 RT: 3.19

T: {0,0} + c EI Full ms [50.00-1000.00]

m/z= 50.00-1000.04

| m/z    | Intensity | Relative |
|--------|-----------|----------|
| 353.26 | 0.0       | 0.00     |
| 353.94 | 0.0       | 0.00     |
| 354.79 | 0.0       | 0.00     |
| 356.20 | 0.0       | 0.00     |
| 357.07 | 0.0       | 0.00     |
| 357.66 | 0.0       | 0.00     |
| 358.34 | 0.0       | 0.00     |
| 359.13 | 745.6     | 0.86     |
| 360.13 | 424.1     | 0.49     |
| 361.51 | 0.1       | 0.00     |
| 362.15 | 0.0       | 0.00     |
| 362.96 | 287.5     | 0.33     |
| 363.68 | 0.0       | 0.00     |
| 365.17 | 0.1       | 0.00     |
| 365.69 | 0.0       | 0.00     |
| 367.29 | 0.0       | 0.00     |
| 368.13 | 0.0       | 0.00     |
| 368.82 | 0.0       | 0.00     |
| 369.73 | 0.0       | 0.00     |
| 370.52 | 0.0       | 0.00     |
| 371.27 | 0.0       | 0.00     |
| 372.32 | 333.2     | 0.39     |
| 372.90 | 0.0       | 0.00     |
| 374.09 | 86515.3   | 100.00   |
| 375.10 | 15470.1   | 17.88    |
| 375.70 | 6893.8    | 7.97     |
| 376.20 | 18538.9   | 21.43    |
| 377.17 | 12037.4   | 13.91    |
| 378.23 | 5563.4    | 6.43     |
| 379.21 | 311.4     | 0.36     |
| 380.21 | 0.0       | 0.00     |
| 381.19 | 0.0       | 0.00     |
| 381.77 | 0.0       | 0.00     |
| 383.19 | 0.1       | 0.00     |
| 383.98 | 0.0       | 0.00     |
| 384.54 | 0.1       | 0.00     |
| 385.32 | 0.1       | 0.00     |
| 386.33 | 0.0       | 0.00     |
| 387.16 | 0.0       | 0.00     |
| 387.75 | 0.0       | 0.00     |
| 388.56 | 0.0       | 0.00     |
| 390.03 | 0.0       | 0.00     |
| 391.14 | 0.0       | 0.00     |
| 391.78 | 0.0       | 0.00     |
| 393.05 | 0.0       | 0.00     |
| 394.19 | 0.0       | 0.00     |
| 394.98 | 0.0       | 0.00     |
| 395.89 | 0.0       | 0.00     |
| 396.67 | 0.0       | 0.00     |
| 397.70 | 0.0       | 0.00     |
| 398.75 | 0.2       | 0.00     |
| 399.31 | 0.1       | 0.00     |
| 399.95 | 0.0       | 0.00     |
| 400.52 | 0.0       | 0.00     |
| 401.59 | 0.0       | 0.00     |

Selwan-41#929 RT: 3.19

T: {0,0} + c EI Full ms [50.00-1000.00]

m/z= 50.00-1000.04

| m/z    | Intensity | Relative |
|--------|-----------|----------|
| 402.30 | 0.0       | 0.00     |
| 403.38 | 0.0       | 0.00     |
| 404.35 | 0.0       | 0.00     |
| 406.02 | 1344.4    | 1.55     |
| 407.03 | 0.0       | 0.00     |
| 407.55 | 0.0       | 0.00     |
| 408.06 | 0.0       | 0.00     |
| 408.56 | 0.0       | 0.00     |
| 409.30 | 0.0       | 0.00     |
| 410.06 | 0.0       | 0.00     |
| 411.10 | 0.0       | 0.00     |
| 411.82 | 0.0       | 0.00     |
| 412.59 | 0.0       | 0.00     |
| 413.92 | 0.0       | 0.00     |
| 414.91 | 0.0       | 0.00     |
| 416.19 | 0.0       | 0.00     |
| 416.81 | 0.0       | 0.00     |
| 417.39 | 0.0       | 0.00     |
| 418.08 | 0.0       | 0.00     |
| 418.95 | 0.1       | 0.00     |
| 420.59 | 0.0       | 0.00     |
| 421.76 | 0.0       | 0.00     |
| 422.36 | 0.0       | 0.00     |
| 423.44 | 0.0       | 0.00     |
| 424.20 | 0.0       | 0.00     |
| 426.36 | 0.0       | 0.00     |
| 427.32 | 0.0       | 0.00     |
| 428.65 | 0.0       | 0.00     |
| 429.53 | 0.0       | 0.00     |
| 430.18 | 0.0       | 0.00     |
| 431.30 | 0.0       | 0.00     |
| 432.38 | 0.3       | 0.00     |
| 433.13 | 0.1       | 0.00     |
| 434.38 | 0.1       | 0.00     |
| 435.14 | 312.7     | 0.36     |
| 436.76 | 0.0       | 0.00     |
| 438.17 | 0.0       | 0.00     |
| 438.93 | 0.0       | 0.00     |
| 439.96 | 0.0       | 0.00     |
| 440.53 | 0.1       | 0.00     |
| 441.98 | 0.0       | 0.00     |
| 442.89 | 0.0       | 0.00     |
| 443.54 | 202.8     | 0.23     |
| 444.22 | 0.0       | 0.00     |
| 444.77 | 0.0       | 0.00     |
| 445.28 | 0.0       | 0.00     |
| 445.87 | 0.0       | 0.00     |
| 446.50 | 0.0       | 0.00     |
| 447.25 | 0.0       | 0.00     |
| 447.78 | 0.0       | 0.00     |
| 450.24 | 2269.9    | 2.62     |
| 451.16 | 12120.7   | 14.01    |
| 452.17 | 6848.2    | 7.92     |
| 453.18 | 1091.0    | 1.26     |
| 454.65 | 0.0       | 0.00     |

Selwan-41#929 RT: 3.19

T: {0,0} + c EI Full ms [50.00-1000.00]

m/z= 50.00-1000.04

| m/z    | Intensity | Relative |
|--------|-----------|----------|
| 455.26 | 0.0       | 0.00     |
| 457.03 | 0.0       | 0.00     |
| 458.11 | 0.0       | 0.00     |
| 459.07 | 0.0       | 0.00     |
| 459.94 | 0.0       | 0.00     |
| 460.62 | 0.0       | 0.00     |
| 461.73 | 0.0       | 0.00     |
| 462.41 | 0.0       | 0.00     |
| 463.32 | 0.0       | 0.00     |
| 464.51 | 0.0       | 0.00     |
| 465.72 | 0.0       | 0.00     |
| 466.85 | 0.1       | 0.00     |
| 467.70 | 0.0       | 0.00     |
| 469.11 | 0.0       | 0.00     |
| 470.60 | 0.0       | 0.00     |
| 471.47 | 0.0       | 0.00     |
| 472.45 | 0.0       | 0.00     |
| 473.10 | 0.0       | 0.00     |
| 474.37 | 0.0       | 0.00     |
| 475.41 | 0.0       | 0.00     |
| 476.12 | 0.0       | 0.00     |
| 476.72 | 0.0       | 0.00     |
| 477.59 | 0.0       | 0.00     |
| 478.93 | 0.0       | 0.00     |
| 479.96 | 0.0       | 0.00     |
| 481.25 | 0.0       | 0.00     |
| 482.13 | 0.0       | 0.00     |
| 482.87 | 0.0       | 0.00     |
| 484.55 | 0.0       | 0.00     |
| 485.67 | 0.0       | 0.00     |
| 486.18 | 0.0       | 0.00     |
| 486.79 | 0.0       | 0.00     |
| 487.50 | 0.0       | 0.00     |
| 488.66 | 0.0       | 0.00     |
| 489.90 | 0.0       | 0.00     |
| 490.41 | 0.0       | 0.00     |
| 490.93 | 0.0       | 0.00     |
| 491.62 | 0.0       | 0.00     |
| 492.43 | 0.0       | 0.00     |
| 493.52 | 0.0       | 0.00     |
| 494.30 | 0.0       | 0.00     |
| 494.97 | 0.0       | 0.00     |
| 495.48 | 0.0       | 0.00     |
| 496.58 | 0.0       | 0.00     |
| 497.27 | 0.1       | 0.00     |
| 498.68 | 0.0       | 0.00     |
| 499.44 | 0.1       | 0.00     |
| 500.34 | 0.0       | 0.00     |
| 502.21 | 0.0       | 0.00     |
| 503.20 | 0.0       | 0.00     |
| 503.98 | 0.0       | 0.00     |
| 504.85 | 0.0       | 0.00     |
| 505.47 | 0.0       | 0.00     |
| 506.02 | 0.0       | 0.00     |
| 506.67 | 0.0       | 0.00     |

Selwan-41#929 RT: 3.19

T: {0,0} + c EI Full ms [50.00-1000.00]

m/z= 50.00-1000.04

| m/z    | Intensity | Relative |
|--------|-----------|----------|
| 507.93 | 0.0       | 0.00     |
| 508.84 | 0.0       | 0.00     |
| 509.41 | 0.0       | 0.00     |
| 511.20 | 0.0       | 0.00     |
| 512.56 | 0.0       | 0.00     |
| 513.32 | 0.0       | 0.00     |
| 514.18 | 0.0       | 0.00     |
| 514.84 | 0.0       | 0.00     |
| 515.95 | 0.0       | 0.00     |
| 516.78 | 0.0       | 0.00     |
| 517.48 | 0.0       | 0.00     |
| 518.18 | 0.0       | 0.00     |
| 519.70 | 0.0       | 0.00     |
| 520.52 | 0.0       | 0.00     |
| 521.35 | 0.0       | 0.00     |
| 522.57 | 0.1       | 0.00     |
| 523.37 | 0.0       | 0.00     |
| 524.71 | 0.0       | 0.00     |
| 525.38 | 0.0       | 0.00     |
| 526.04 | 0.1       | 0.00     |
| 527.01 | 0.0       | 0.00     |
| 528.04 | 0.0       | 0.00     |
| 529.01 | 0.0       | 0.00     |
| 529.70 | 0.0       | 0.00     |
| 530.55 | 0.0       | 0.00     |
| 531.18 | 0.0       | 0.00     |
| 532.02 | 0.1       | 0.00     |
| 532.70 | 0.0       | 0.00     |
| 533.64 | 0.0       | 0.00     |
| 534.29 | 0.0       | 0.00     |
| 535.29 | 0.1       | 0.00     |
| 536.64 | 0.0       | 0.00     |
| 537.31 | 0.0       | 0.00     |
| 537.86 | 0.0       | 0.00     |
| 538.37 | 0.0       | 0.00     |
| 539.32 | 0.0       | 0.00     |
| 539.91 | 0.0       | 0.00     |
| 541.14 | 0.0       | 0.00     |
| 541.81 | 0.0       | 0.00     |
| 543.09 | 0.0       | 0.00     |
| 544.42 | 0.0       | 0.00     |
| 545.88 | 0.0       | 0.00     |
| 546.53 | 0.0       | 0.00     |
| 547.48 | 0.0       | 0.00     |
| 548.94 | 0.0       | 0.00     |
| 549.81 | 0.0       | 0.00     |
| 550.70 | 0.0       | 0.00     |
| 551.75 | 0.0       | 0.00     |
| 554.10 | 0.0       | 0.00     |
| 555.03 | 0.0       | 0.00     |
| 556.11 | 0.0       | 0.00     |
| 556.79 | 0.0       | 0.00     |
| 557.51 | 0.0       | 0.00     |
| 558.92 | 0.0       | 0.00     |
| 559.72 | 0.0       | 0.00     |

Selwan-41#929 RT: 3.19

T: {0,0} + c EI Full ms [50.00-1000.00]

m/z= 50.00-1000.04

| m/z    | Intensity | Relative |
|--------|-----------|----------|
| 560.68 | 0.0       | 0.00     |
| 561.23 | 0.0       | 0.00     |
| 562.25 | 0.0       | 0.00     |
| 563.44 | 0.1       | 0.00     |
| 564.14 | 0.0       | 0.00     |
| 565.47 | 0.0       | 0.00     |
| 566.06 | 0.0       | 0.00     |
| 567.64 | 0.0       | 0.00     |
| 568.87 | 0.0       | 0.00     |
| 569.98 | 0.0       | 0.00     |
| 570.72 | 0.0       | 0.00     |
| 571.94 | 0.0       | 0.00     |
| 573.03 | 0.0       | 0.00     |
| 574.64 | 0.0       | 0.00     |
| 575.14 | 0.0       | 0.00     |
| 576.62 | 2.0       | 0.00     |
| 577.46 | 0.0       | 0.00     |
| 578.11 | 0.1       | 0.00     |
| 579.38 | 0.0       | 0.00     |
| 580.30 | 0.0       | 0.00     |
| 580.87 | 0.0       | 0.00     |
| 582.86 | 0.0       | 0.00     |
| 583.76 | 0.0       | 0.00     |
| 584.65 | 0.0       | 0.00     |
| 585.83 | 0.0       | 0.00     |
| 586.51 | 0.0       | 0.00     |
| 587.14 | 0.0       | 0.00     |
| 588.08 | 0.0       | 0.00     |
| 588.89 | 0.0       | 0.00     |
| 589.48 | 0.0       | 0.00     |
| 590.22 | 0.0       | 0.00     |
| 591.75 | 0.0       | 0.00     |
| 593.04 | 0.0       | 0.00     |
| 593.89 | 0.0       | 0.00     |
| 594.99 | 0.0       | 0.00     |
| 595.72 | 0.0       | 0.00     |
| 597.16 | 0.0       | 0.00     |
| 597.83 | 0.0       | 0.00     |
| 598.42 | 0.0       | 0.00     |
| 599.40 | 0.0       | 0.00     |
| 599.97 | 0.0       | 0.00     |
| 600.75 | 0.0       | 0.00     |
| 601.36 | 0.0       | 0.00     |
| 601.93 | 0.0       | 0.00     |
| 602.51 | 0.0       | 0.00     |
| 604.37 | 0.0       | 0.00     |
| 605.18 | 0.0       | 0.00     |
| 606.26 | 0.0       | 0.00     |
| 607.08 | 0.0       | 0.00     |
| 608.18 | 0.0       | 0.00     |
| 608.94 | 0.0       | 0.00     |
| 609.82 | 0.0       | 0.00     |
| 611.06 | 0.0       | 0.00     |
| 611.75 | 0.0       | 0.00     |
| 612.41 | 0.0       | 0.00     |

Selwan-41#929 RT: 3.19

T: {0,0} + c EI Full ms [50.00-1000.00]

m/z= 50.00-1000.04

| m/z    | Intensity | Relative |
|--------|-----------|----------|
| 612.94 | 0.0       | 0.00     |
| 613.73 | 0.0       | 0.00     |
| 614.69 | 0.0       | 0.00     |
| 615.61 | 0.0       | 0.00     |
| 616.36 | 0.0       | 0.00     |
| 617.10 | 0.0       | 0.00     |
| 617.83 | 0.0       | 0.00     |
| 618.50 | 0.2       | 0.00     |
| 619.60 | 0.0       | 0.00     |
| 620.18 | 0.0       | 0.00     |
| 620.75 | 0.0       | 0.00     |
| 621.68 | 0.0       | 0.00     |
| 622.31 | 0.0       | 0.00     |
| 622.93 | 0.0       | 0.00     |
| 623.93 | 0.0       | 0.00     |
| 624.58 | 0.0       | 0.00     |
| 625.54 | 0.0       | 0.00     |
| 626.47 | 0.0       | 0.00     |
| 627.49 | 0.0       | 0.00     |
| 628.30 | 0.0       | 0.00     |
| 628.96 | 0.0       | 0.00     |
| 630.13 | 0.0       | 0.00     |
| 631.39 | 0.0       | 0.00     |
| 632.30 | 0.0       | 0.00     |
| 632.94 | 0.0       | 0.00     |
| 633.47 | 0.0       | 0.00     |
| 634.81 | 0.0       | 0.00     |
| 635.51 | 0.0       | 0.00     |
| 636.07 | 0.0       | 0.00     |
| 636.77 | 0.0       | 0.00     |
| 637.39 | 0.0       | 0.00     |
| 637.96 | 0.0       | 0.00     |
| 638.57 | 0.0       | 0.00     |
| 639.25 | 0.0       | 0.00     |
| 639.82 | 0.0       | 0.00     |
| 640.99 | 0.0       | 0.00     |
| 641.52 | 0.0       | 0.00     |
| 642.11 | 0.0       | 0.00     |
| 642.78 | 0.0       | 0.00     |
| 643.31 | 0.0       | 0.00     |
| 643.87 | 0.0       | 0.00     |
| 644.80 | 0.0       | 0.00     |
| 645.43 | 0.0       | 0.00     |
| 646.66 | 0.0       | 0.00     |
| 647.21 | 0.0       | 0.00     |
| 647.98 | 0.0       | 0.00     |
| 648.82 | 0.0       | 0.00     |
| 649.68 | 0.0       | 0.00     |
| 650.78 | 0.0       | 0.00     |
| 651.80 | 0.0       | 0.00     |
| 652.53 | 0.0       | 0.00     |
| 653.09 | 0.0       | 0.00     |
| 653.98 | 0.0       | 0.00     |
| 655.08 | 0.0       | 0.00     |
| 655.75 | 0.0       | 0.00     |

Selwan-41#929 RT: 3.19

T: {0,0} + c EI Full ms [50.00-1000.00]

m/z= 50.00-1000.04

| m/z    | Intensity | Relative |
|--------|-----------|----------|
| 656.66 | 0.0       | 0.00     |
| 657.23 | 0.0       | 0.00     |
| 657.97 | 0.0       | 0.00     |
| 658.56 | 0.0       | 0.00     |
| 659.10 | 0.0       | 0.00     |
| 660.58 | 0.0       | 0.00     |
| 661.14 | 0.0       | 0.00     |
| 661.96 | 0.0       | 0.00     |
| 662.72 | 0.0       | 0.00     |
| 663.32 | 0.0       | 0.00     |
| 663.92 | 0.0       | 0.00     |
| 664.68 | 0.0       | 0.00     |
| 665.34 | 0.0       | 0.00     |
| 665.95 | 0.0       | 0.00     |
| 667.07 | 0.0       | 0.00     |
| 668.07 | 0.0       | 0.00     |
| 668.58 | 0.0       | 0.00     |
| 669.24 | 0.0       | 0.00     |
| 670.27 | 0.0       | 0.00     |
| 671.48 | 0.0       | 0.00     |
| 672.67 | 0.0       | 0.00     |
| 673.95 | 0.0       | 0.00     |
| 674.95 | 0.0       | 0.00     |
| 675.96 | 0.0       | 0.00     |
| 676.50 | 0.0       | 0.00     |
| 677.23 | 0.0       | 0.00     |
| 678.02 | 0.0       | 0.00     |
| 678.76 | 0.0       | 0.00     |
| 680.19 | 0.0       | 0.00     |
| 680.84 | 0.0       | 0.00     |
| 681.48 | 0.0       | 0.00     |
| 682.08 | 0.0       | 0.00     |
| 683.04 | 0.0       | 0.00     |
| 683.59 | 0.0       | 0.00     |
| 684.19 | 0.0       | 0.00     |
| 685.99 | 0.0       | 0.00     |
| 686.80 | 0.0       | 0.00     |
| 688.07 | 0.0       | 0.00     |
| 688.65 | 0.0       | 0.00     |
| 689.80 | 0.0       | 0.00     |
| 690.54 | 0.0       | 0.00     |
| 691.27 | 0.0       | 0.00     |
| 692.68 | 0.0       | 0.00     |
| 693.34 | 0.0       | 0.00     |
| 694.89 | 0.0       | 0.00     |
| 695.45 | 0.0       | 0.00     |
| 696.03 | 0.0       | 0.00     |
| 696.65 | 0.0       | 0.00     |
| 697.63 | 0.0       | 0.00     |
| 698.18 | 0.1       | 0.00     |
| 699.15 | 0.1       | 0.00     |
| 700.53 | 0.0       | 0.00     |
| 701.24 | 0.0       | 0.00     |
| 701.79 | 0.0       | 0.00     |
| 702.43 | 0.0       | 0.00     |

Selwan-41#929 RT: 3.19

T: {0,0} + c EI Full ms [50.00-1000.00]

m/z= 50.00-1000.04

| m/z    | Intensity | Relative |
|--------|-----------|----------|
| 704.44 | 0.0       | 0.00     |
| 705.13 | 0.0       | 0.00     |
| 706.49 | 0.0       | 0.00     |
| 707.52 | 0.0       | 0.00     |
| 708.23 | 0.0       | 0.00     |
| 708.84 | 0.0       | 0.00     |
| 709.72 | 0.0       | 0.00     |
| 710.40 | 0.0       | 0.00     |
| 711.04 | 0.0       | 0.00     |
| 712.09 | 0.0       | 0.00     |
| 713.56 | 0.0       | 0.00     |
| 714.50 | 0.0       | 0.00     |
| 715.45 | 0.0       | 0.00     |
| 716.07 | 0.0       | 0.00     |
| 717.05 | 0.0       | 0.00     |
| 717.83 | 0.0       | 0.00     |
| 718.76 | 0.0       | 0.00     |
| 719.82 | 0.0       | 0.00     |
| 721.19 | 0.0       | 0.00     |
| 721.71 | 0.0       | 0.00     |
| 723.07 | 0.0       | 0.00     |
| 723.72 | 0.0       | 0.00     |
| 724.89 | 0.0       | 0.00     |
| 725.53 | 0.0       | 0.00     |
| 726.58 | 0.0       | 0.00     |
| 727.59 | 0.0       | 0.00     |
| 728.42 | 0.0       | 0.00     |
| 729.52 | 0.0       | 0.00     |
| 730.86 | 0.0       | 0.00     |
| 731.74 | 0.0       | 0.00     |
| 732.47 | 0.0       | 0.00     |
| 733.57 | 0.0       | 0.00     |
| 734.42 | 0.0       | 0.00     |
| 735.07 | 0.0       | 0.00     |
| 735.85 | 0.0       | 0.00     |
| 737.14 | 0.0       | 0.00     |
| 737.96 | 0.0       | 0.00     |
| 738.87 | 0.0       | 0.00     |
| 740.03 | 0.0       | 0.00     |
| 740.89 | 0.0       | 0.00     |
| 741.47 | 0.0       | 0.00     |
| 742.13 | 0.0       | 0.00     |
| 743.01 | 0.0       | 0.00     |
| 743.66 | 0.1       | 0.00     |
| 744.48 | 0.0       | 0.00     |
| 745.46 | 0.0       | 0.00     |
| 746.32 | 0.0       | 0.00     |
| 747.46 | 0.0       | 0.00     |
| 748.26 | 0.0       | 0.00     |
| 748.85 | 0.0       | 0.00     |
| 749.46 | 0.0       | 0.00     |
| 750.33 | 1.1       | 0.00     |
| 750.93 | 0.0       | 0.00     |
| 751.46 | 0.0       | 0.00     |
| 753.69 | 0.0       | 0.00     |



Selwan-41#929 RT: 3.19

T: {0,0} + c EI Full ms [50.00-1000.00]

m/z= 50.00-1000.04

| m/z    | Intensity | Relative |
|--------|-----------|----------|
| 754.89 | 0.0       | 0.00     |
| 756.22 | 0.0       | 0.00     |
| 757.64 | 0.0       | 0.00     |
| 758.60 | 0.0       | 0.00     |
| 759.69 | 0.0       | 0.00     |
| 761.04 | 0.0       | 0.00     |
| 762.03 | 0.0       | 0.00     |
| 762.70 | 0.0       | 0.00     |
| 763.49 | 0.0       | 0.00     |
| 764.25 | 0.0       | 0.00     |
| 764.85 | 0.0       | 0.00     |
| 765.51 | 0.0       | 0.00     |
| 767.25 | 0.0       | 0.00     |
| 768.38 | 0.0       | 0.00     |
| 768.93 | 0.0       | 0.00     |
| 769.96 | 0.0       | 0.00     |
| 771.14 | 0.0       | 0.00     |
| 772.01 | 0.0       | 0.00     |
| 772.67 | 0.0       | 0.00     |
| 774.62 | 0.0       | 0.00     |
| 775.13 | 0.0       | 0.00     |
| 776.04 | 0.0       | 0.00     |
| 777.88 | 0.0       | 0.00     |
| 778.85 | 0.0       | 0.00     |
| 780.39 | 0.0       | 0.00     |
| 781.15 | 0.0       | 0.00     |
| 782.04 | 0.0       | 0.00     |
| 783.17 | 0.0       | 0.00     |
| 784.15 | 0.0       | 0.00     |
| 784.85 | 0.0       | 0.00     |
| 786.01 | 0.0       | 0.00     |
| 786.70 | 0.0       | 0.00     |
| 788.31 | 0.0       | 0.00     |
| 789.40 | 0.0       | 0.00     |
| 790.17 | 0.0       | 0.00     |
| 790.98 | 0.0       | 0.00     |
| 791.53 | 0.0       | 0.00     |
| 792.07 | 0.0       | 0.00     |
| 792.85 | 0.0       | 0.00     |
| 793.39 | 0.0       | 0.00     |
| 794.09 | 0.0       | 0.00     |
| 794.80 | 0.0       | 0.00     |
| 795.63 | 0.1       | 0.00     |
| 796.67 | 0.0       | 0.00     |
| 797.81 | 0.0       | 0.00     |
| 798.32 | 0.0       | 0.00     |
| 798.87 | 0.0       | 0.00     |
| 800.10 | 0.0       | 0.00     |
| 801.03 | 0.2       | 0.00     |
| 802.50 | 0.0       | 0.00     |
| 803.78 | 0.0       | 0.00     |
| 804.44 | 0.0       | 0.00     |
| 805.33 | 0.0       | 0.00     |
| 806.25 | 0.0       | 0.00     |
| 806.77 | 0.0       | 0.00     |

Selwan-41#929 RT: 3.19

T: {0,0} + c EI Full ms [50.00-1000.00]

m/z= 50.00-1000.04

| m/z    | Intensity | Relative |
|--------|-----------|----------|
| 807.29 | 0.0       | 0.00     |
| 808.38 | 0.0       | 0.00     |
| 809.65 | 0.0       | 0.00     |
| 810.38 | 0.0       | 0.00     |
| 811.53 | 0.0       | 0.00     |
| 812.86 | 0.0       | 0.00     |
| 814.13 | 0.0       | 0.00     |
| 815.33 | 0.1       | 0.00     |
| 815.94 | 0.0       | 0.00     |
| 816.96 | 0.0       | 0.00     |
| 817.47 | 0.0       | 0.00     |
| 818.61 | 0.0       | 0.00     |
| 819.27 | 0.0       | 0.00     |
| 819.97 | 0.0       | 0.00     |
| 820.49 | 0.0       | 0.00     |
| 821.08 | 0.0       | 0.00     |
| 821.82 | 0.0       | 0.00     |
| 823.03 | 0.0       | 0.00     |
| 823.63 | 0.0       | 0.00     |
| 824.70 | 0.0       | 0.00     |
| 825.21 | 0.0       | 0.00     |
| 825.72 | 0.0       | 0.00     |
| 826.50 | 0.0       | 0.00     |
| 827.64 | 0.0       | 0.00     |
| 828.57 | 0.0       | 0.00     |
| 829.18 | 0.0       | 0.00     |
| 829.87 | 0.0       | 0.00     |
| 830.91 | 0.0       | 0.00     |
| 831.59 | 0.0       | 0.00     |
| 832.22 | 0.0       | 0.00     |
| 833.34 | 0.0       | 0.00     |
| 834.14 | 0.0       | 0.00     |
| 834.84 | 0.0       | 0.00     |
| 836.17 | 0.0       | 0.00     |
| 836.73 | 0.0       | 0.00     |
| 838.02 | 0.0       | 0.00     |
| 838.66 | 0.0       | 0.00     |
| 839.29 | 0.0       | 0.00     |
| 840.02 | 0.0       | 0.00     |
| 841.21 | 0.0       | 0.00     |
| 842.95 | 0.0       | 0.00     |
| 844.17 | 0.0       | 0.00     |
| 845.11 | 0.0       | 0.00     |
| 846.23 | 0.0       | 0.00     |
| 847.58 | 0.0       | 0.00     |
| 848.23 | 0.0       | 0.00     |
| 848.98 | 0.0       | 0.00     |
| 849.82 | 0.0       | 0.00     |
| 850.35 | 0.0       | 0.00     |
| 851.19 | 0.0       | 0.00     |
| 851.72 | 0.0       | 0.00     |
| 852.93 | 0.0       | 0.00     |
| 853.85 | 0.0       | 0.00     |
| 854.95 | 0.0       | 0.00     |
| 855.75 | 0.0       | 0.00     |

Selwan-41#929 RT: 3.19

T: {0,0} + c EI Full ms [50.00-1000.00]

m/z= 50.00-1000.04

| m/z    | Intensity | Relative |
|--------|-----------|----------|
| 856.66 | 0.0       | 0.00     |
| 857.16 | 0.0       | 0.00     |
| 857.97 | 0.0       | 0.00     |
| 859.62 | 0.0       | 0.00     |
| 860.39 | 0.0       | 0.00     |
| 861.23 | 0.0       | 0.00     |
| 862.03 | 0.0       | 0.00     |
| 862.69 | 0.0       | 0.00     |
| 863.42 | 0.0       | 0.00     |
| 864.30 | 0.0       | 0.00     |
| 865.47 | 0.0       | 0.00     |
| 866.10 | 0.0       | 0.00     |
| 866.66 | 0.0       | 0.00     |
| 868.16 | 0.0       | 0.00     |
| 868.73 | 0.0       | 0.00     |
| 869.50 | 0.0       | 0.00     |
| 870.23 | 0.0       | 0.00     |
| 870.85 | 0.0       | 0.00     |
| 871.67 | 0.0       | 0.00     |
| 872.82 | 0.0       | 0.00     |
| 873.65 | 0.0       | 0.00     |
| 874.53 | 0.1       | 0.00     |
| 875.33 | 0.0       | 0.00     |
| 876.20 | 0.0       | 0.00     |
| 876.85 | 0.0       | 0.00     |
| 877.75 | 0.0       | 0.00     |
| 878.43 | 0.0       | 0.00     |
| 879.37 | 0.0       | 0.00     |
| 880.05 | 0.0       | 0.00     |
| 880.84 | 0.0       | 0.00     |
| 881.55 | 0.0       | 0.00     |
| 882.50 | 0.3       | 0.00     |
| 883.99 | 0.0       | 0.00     |
| 884.86 | 0.0       | 0.00     |
| 886.18 | 0.1       | 0.00     |
| 887.09 | 0.0       | 0.00     |
| 887.96 | 0.0       | 0.00     |
| 889.00 | 0.0       | 0.00     |
| 889.54 | 0.0       | 0.00     |
| 890.24 | 0.0       | 0.00     |
| 891.52 | 0.0       | 0.00     |
| 892.53 | 0.0       | 0.00     |
| 893.23 | 0.0       | 0.00     |
| 894.05 | 0.0       | 0.00     |
| 895.06 | 0.1       | 0.00     |
| 895.62 | 0.0       | 0.00     |
| 896.13 | 0.0       | 0.00     |
| 896.67 | 0.0       | 0.00     |
| 897.84 | 0.0       | 0.00     |
| 899.00 | 0.0       | 0.00     |
| 900.62 | 0.0       | 0.00     |
| 901.20 | 0.0       | 0.00     |
| 902.66 | 0.1       | 0.00     |
| 903.23 | 0.0       | 0.00     |
| 904.30 | 0.0       | 0.00     |

Selwan-41#929 RT: 3.19

T: {0,0} + c EI Full ms [50.00-1000.00]

m/z= 50.00-1000.04

| m/z    | Intensity | Relative |
|--------|-----------|----------|
| 905.36 | 0.0       | 0.00     |
| 906.00 | 0.0       | 0.00     |
| 906.86 | 0.0       | 0.00     |
| 908.05 | 0.0       | 0.00     |
| 908.75 | 0.0       | 0.00     |
| 909.36 | 0.0       | 0.00     |
| 910.03 | 0.0       | 0.00     |
| 911.10 | 0.1       | 0.00     |
| 911.81 | 0.0       | 0.00     |
| 912.66 | 0.0       | 0.00     |
| 914.64 | 0.0       | 0.00     |
| 915.36 | 0.0       | 0.00     |
| 916.05 | 0.0       | 0.00     |
| 916.80 | 0.0       | 0.00     |
| 918.01 | 0.0       | 0.00     |
| 918.97 | 0.0       | 0.00     |
| 919.48 | 0.0       | 0.00     |
| 920.01 | 0.0       | 0.00     |
| 920.67 | 0.0       | 0.00     |
| 921.59 | 0.0       | 0.00     |
| 922.56 | 0.0       | 0.00     |
| 923.95 | 0.0       | 0.00     |
| 925.00 | 0.0       | 0.00     |
| 926.35 | 0.0       | 0.00     |
| 927.24 | 0.0       | 0.00     |
| 928.02 | 0.0       | 0.00     |
| 928.96 | 0.0       | 0.00     |
| 929.65 | 0.0       | 0.00     |
| 931.31 | 0.0       | 0.00     |
| 932.42 | 0.0       | 0.00     |
| 933.57 | 0.0       | 0.00     |
| 935.24 | 0.0       | 0.00     |
| 936.10 | 0.0       | 0.00     |
| 936.87 | 0.0       | 0.00     |
| 937.51 | 0.0       | 0.00     |
| 938.72 | 0.0       | 0.00     |
| 939.59 | 0.2       | 0.00     |
| 940.46 | 0.0       | 0.00     |
| 941.34 | 0.0       | 0.00     |
| 942.02 | 0.0       | 0.00     |
| 942.61 | 0.0       | 0.00     |
| 943.58 | 0.0       | 0.00     |
| 944.10 | 0.0       | 0.00     |
| 944.67 | 0.0       | 0.00     |
| 945.28 | 0.0       | 0.00     |
| 946.15 | 38.6      | 0.04     |
| 946.84 | 0.0       | 0.00     |
| 947.82 | 0.0       | 0.00     |
| 948.56 | 0.0       | 0.00     |
| 949.21 | 0.0       | 0.00     |
| 949.92 | 0.0       | 0.00     |
| 951.23 | 0.0       | 0.00     |
| 951.78 | 0.0       | 0.00     |
| 952.31 | 0.0       | 0.00     |
| 953.28 | 0.0       | 0.00     |

Selwan-41#929 RT: 3.19

T: {0,0} + c EI Full ms [50.00-1000.00]

m/z= 50.00-1000.04

| m/z    | Intensity | Relative |
|--------|-----------|----------|
| 954.13 | 0.0       | 0.00     |
| 954.68 | 0.0       | 0.00     |
| 955.59 | 0.0       | 0.00     |
| 956.53 | 0.0       | 0.00     |
| 957.58 | 0.0       | 0.00     |
| 958.26 | 0.0       | 0.00     |
| 958.83 | 0.0       | 0.00     |
| 959.92 | 0.0       | 0.00     |
| 960.66 | 0.0       | 0.00     |
| 961.72 | 0.0       | 0.00     |
| 962.44 | 0.0       | 0.00     |
| 963.95 | 0.0       | 0.00     |
| 964.94 | 0.0       | 0.00     |
| 965.54 | 0.0       | 0.00     |
| 966.67 | 0.0       | 0.00     |
| 968.10 | 0.0       | 0.00     |
| 969.00 | 0.0       | 0.00     |
| 970.39 | 0.0       | 0.00     |
| 970.90 | 0.0       | 0.00     |
| 971.63 | 0.0       | 0.00     |
| 972.63 | 0.0       | 0.00     |
| 973.57 | 0.0       | 0.00     |
| 974.92 | 0.0       | 0.00     |
| 975.55 | 0.0       | 0.00     |
| 976.43 | 0.0       | 0.00     |
| 977.00 | 0.0       | 0.00     |
| 977.52 | 0.0       | 0.00     |
| 978.21 | 0.0       | 0.00     |
| 979.52 | 0.0       | 0.00     |
| 980.25 | 0.0       | 0.00     |
| 981.27 | 0.0       | 0.00     |
| 982.41 | 0.0       | 0.00     |
| 983.61 | 0.0       | 0.00     |
| 984.53 | 0.1       | 0.00     |
| 985.15 | 0.0       | 0.00     |
| 985.73 | 0.0       | 0.00     |
| 986.40 | 0.0       | 0.00     |
| 987.23 | 0.0       | 0.00     |
| 988.41 | 0.0       | 0.00     |
| 989.41 | 0.0       | 0.00     |
| 990.76 | 0.0       | 0.00     |
| 991.48 | 0.0       | 0.00     |
| 992.34 | 0.0       | 0.00     |
| 992.89 | 0.0       | 0.00     |
| 993.56 | 0.0       | 0.00     |
| 994.26 | 0.0       | 0.00     |
| 994.80 | 0.0       | 0.00     |
| 995.77 | 0.0       | 0.00     |
| 996.65 | 0.0       | 0.00     |
| 997.88 | 0.1       | 0.00     |
| 998.92 | 0.0       | 0.00     |
| 999.67 | 0.0       | 0.00     |
