# Supplementary material for: A Simple and Efficient Multicomponent Synthesis of Novel Pyrazole, N-aminopyridine and Pyrazolo[3,4-b]Pyridine Derivatives in Water
Source: Preprints.org preprint supplement (doi:10.20944/preprints202312.1232.v1), 2023-12-28
Supplement: Supplementary file 17 [file supplementary]

RT: 0.00 - 4.24

NL:  
2.93E6  
TIC MS  
Hayam-142

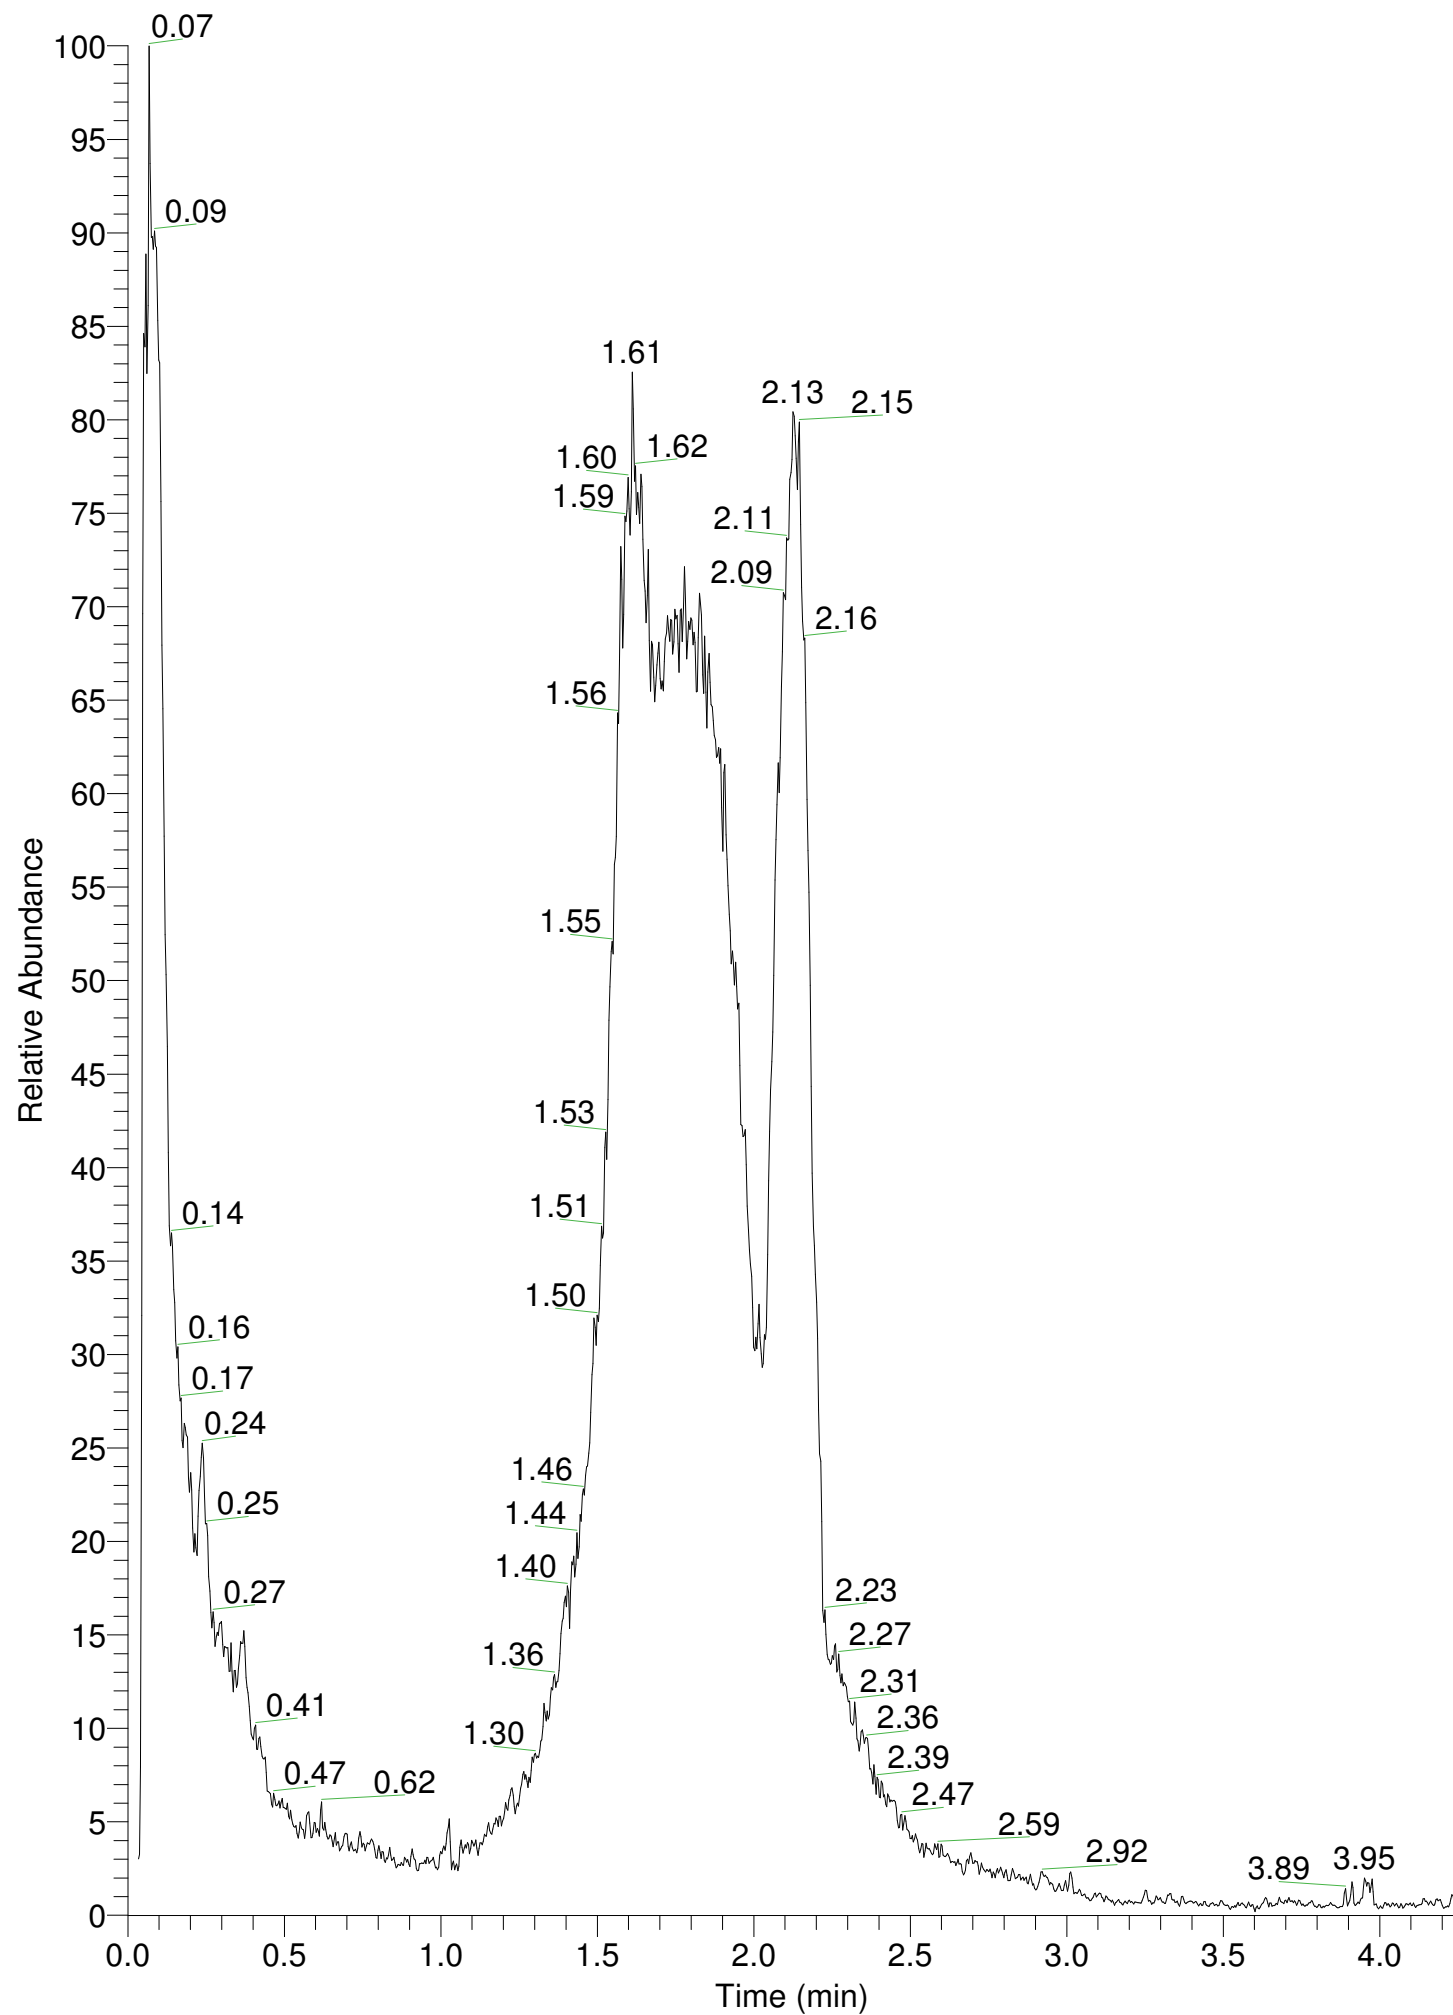

Hayam-142 #539 RT: 1.86 AV: 1 NL: 2.29E5

T: {0,0} + c EI Full ms [50.00-600.00]

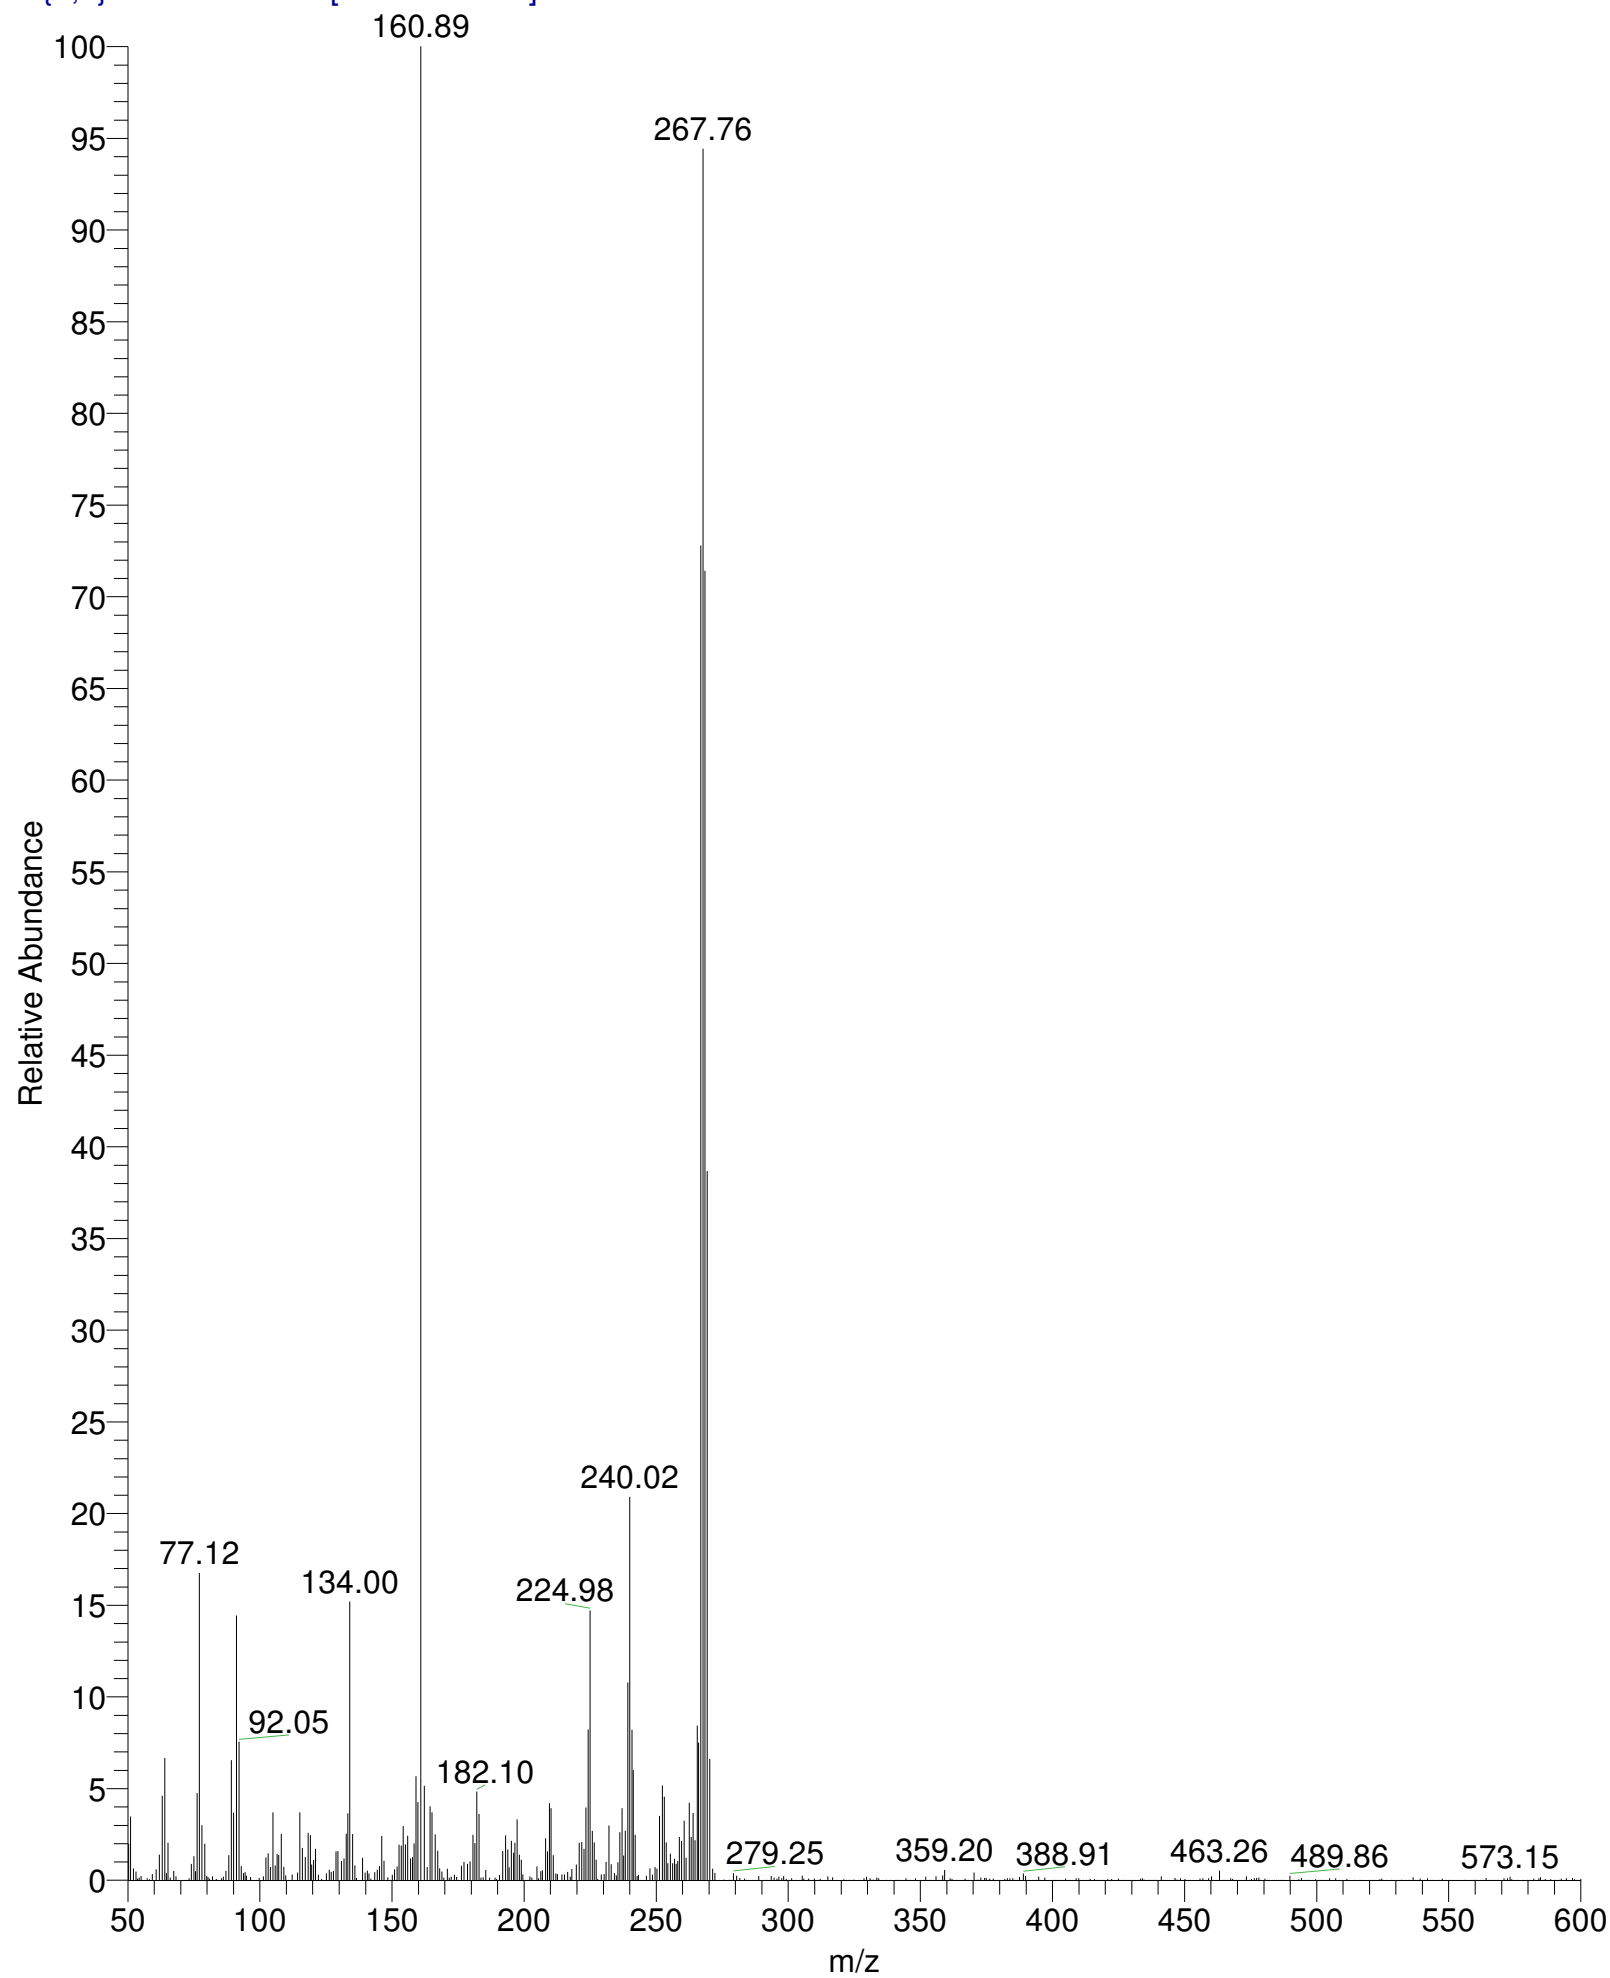

Hayam-142#539 RT: 1.86

T: {0,0} + c EI Full ms [50.00-600.00]

m/z= 50.00-600.03

| m/z   | Intensity | Relative |
|-------|-----------|----------|
| 50.24 | 4518.6    | 1.97     |
| 51.07 | 7945.0    | 3.47     |
| 52.17 | 1458.6    | 0.64     |
| 53.14 | 1048.0    | 0.46     |
| 53.75 | 168.7     | 0.07     |
| 54.31 | 289.8     | 0.13     |
| 55.09 | 491.9     | 0.21     |
| 55.63 | 0.0       | 0.00     |
| 56.38 | 0.2       | 0.00     |
| 57.39 | 231.2     | 0.10     |
| 58.17 | 93.8      | 0.04     |
| 59.23 | 734.1     | 0.32     |
| 60.70 | 1346.4    | 0.59     |
| 61.95 | 3183.7    | 1.39     |
| 63.05 | 10532.5   | 4.60     |
| 64.05 | 15233.0   | 6.65     |
| 64.63 | 874.0     | 0.38     |
| 65.17 | 4658.2    | 2.03     |
| 66.06 | 314.6     | 0.14     |
| 67.37 | 1152.3    | 0.50     |
| 68.25 | 444.8     | 0.19     |
| 69.22 | 26.2      | 0.01     |
| 70.51 | 0.1       | 0.00     |
| 71.54 | 7.1       | 0.00     |
| 72.26 | 0.9       | 0.00     |
| 73.21 | 216.7     | 0.09     |
| 74.06 | 2034.9    | 0.89     |
| 75.04 | 2968.5    | 1.30     |
| 75.59 | 1103.1    | 0.48     |
| 76.26 | 10839.0   | 4.73     |
| 77.12 | 38334.1   | 16.75    |
| 78.07 | 6852.1    | 2.99     |
| 79.14 | 4517.6    | 1.97     |
| 79.80 | 488.3     | 0.21     |
| 80.32 | 394.6     | 0.17     |
| 80.89 | 165.5     | 0.07     |
| 82.05 | 469.6     | 0.21     |
| 82.97 | 0.2       | 0.00     |
| 83.55 | 147.5     | 0.06     |
| 84.14 | 0.4       | 0.00     |
| 85.45 | 211.1     | 0.09     |
| 86.14 | 403.8     | 0.18     |
| 87.16 | 1140.7    | 0.50     |
| 88.20 | 3100.4    | 1.35     |
| 89.15 | 14943.2   | 6.53     |
| 90.03 | 8398.2    | 3.67     |
| 91.07 | 33030.4   | 14.43    |
| 92.05 | 17262.9   | 7.54     |
| 92.99 | 1721.6    | 0.75     |
| 93.77 | 852.6     | 0.37     |
| 94.34 | 980.1     | 0.43     |
| 94.92 | 525.1     | 0.23     |
| 95.43 | 0.1       | 0.00     |
| 96.40 | 363.5     | 0.16     |
| 97.08 | 14.7      | 0.01     |

Hayam-142#539 RT: 1.86

T: {0,0} + c EI Full ms [50.00-600.00]

m/z= 50.00-600.03

| m/z    | Intensity | Relative |
|--------|-----------|----------|
| 97.78  | 0.1       | 0.00     |
| 98.64  | 0.2       | 0.00     |
| 99.67  | 261.3     | 0.11     |
| 101.25 | 441.4     | 0.19     |
| 102.25 | 2832.1    | 1.24     |
| 103.06 | 3317.6    | 1.45     |
| 103.93 | 1637.3    | 0.72     |
| 104.91 | 8432.9    | 3.68     |
| 105.82 | 1806.6    | 0.79     |
| 106.56 | 3251.9    | 1.42     |
| 107.15 | 3152.5    | 1.38     |
| 108.02 | 5781.0    | 2.53     |
| 108.99 | 1638.2    | 0.72     |
| 109.82 | 593.8     | 0.26     |
| 110.88 | 0.3       | 0.00     |
| 112.23 | 718.6     | 0.31     |
| 113.34 | 34.1      | 0.01     |
| 114.23 | 924.8     | 0.40     |
| 115.11 | 8452.6    | 3.69     |
| 116.07 | 4034.9    | 1.76     |
| 117.15 | 2866.9    | 1.25     |
| 118.21 | 5889.3    | 2.57     |
| 119.05 | 5604.7    | 2.45     |
| 119.64 | 1924.2    | 0.84     |
| 120.26 | 2479.8    | 1.08     |
| 121.06 | 3904.1    | 1.71     |
| 122.09 | 650.6     | 0.28     |
| 123.40 | 152.1     | 0.07     |
| 125.10 | 799.5     | 0.35     |
| 126.31 | 1290.4    | 0.56     |
| 126.92 | 1011.0    | 0.44     |
| 127.84 | 1152.3    | 0.50     |
| 128.74 | 3570.0    | 1.56     |
| 129.57 | 3619.2    | 1.58     |
| 130.82 | 2364.3    | 1.03     |
| 131.85 | 2704.8    | 1.18     |
| 132.67 | 5754.2    | 2.51     |
| 133.26 | 8341.4    | 3.64     |
| 134.00 | 34790.6   | 15.20    |
| 135.09 | 5743.7    | 2.51     |
| 135.98 | 1828.7    | 0.80     |
| 136.57 | 267.6     | 0.12     |
| 138.84 | 2778.6    | 1.21     |
| 139.78 | 922.6     | 0.40     |
| 140.62 | 1166.5    | 0.51     |
| 141.28 | 823.3     | 0.36     |
| 142.02 | 187.5     | 0.08     |
| 142.83 | 29.0      | 0.01     |
| 143.47 | 990.7     | 0.43     |
| 144.41 | 1299.9    | 0.57     |
| 145.24 | 1727.4    | 0.75     |
| 146.09 | 5498.5    | 2.40     |
| 146.95 | 2432.5    | 1.06     |
| 147.66 | 11.1      | 0.00     |
| 148.41 | 323.0     | 0.14     |

Hayam-142#539 RT: 1.86

T: {0,0} + c EI Full ms [50.00-600.00]

m/z= 50.00-600.03

| m/z    | Intensity | Relative |
|--------|-----------|----------|
| 149.40 | 5.4       | 0.00     |
| 150.07 | 651.5     | 0.28     |
| 151.01 | 1327.7    | 0.58     |
| 151.92 | 1680.5    | 0.73     |
| 152.61 | 4419.1    | 1.93     |
| 153.46 | 4275.2    | 1.87     |
| 154.22 | 6728.3    | 2.94     |
| 155.08 | 4442.1    | 1.94     |
| 155.93 | 5527.0    | 2.41     |
| 156.96 | 2693.4    | 1.18     |
| 157.72 | 2868.2    | 1.25     |
| 158.37 | 4555.4    | 1.99     |
| 159.06 | 12967.1   | 5.66     |
| 159.74 | 9738.1    | 4.25     |
| 160.89 | 228918.8  | 100.00   |
| 162.18 | 11781.8   | 5.15     |
| 163.30 | 1600.8    | 0.70     |
| 164.42 | 9197.1    | 4.02     |
| 165.14 | 8444.0    | 3.69     |
| 166.29 | 5676.9    | 2.48     |
| 167.34 | 3650.7    | 1.59     |
| 168.08 | 1455.1    | 0.64     |
| 168.93 | 1055.9    | 0.46     |
| 169.64 | 285.7     | 0.12     |
| 170.98 | 1400.4    | 0.61     |
| 171.67 | 292.7     | 0.13     |
| 172.37 | 417.4     | 0.18     |
| 173.67 | 643.0     | 0.28     |
| 174.44 | 378.0     | 0.17     |
| 175.24 | 22.1      | 0.01     |
| 176.26 | 1776.1    | 0.78     |
| 177.21 | 2242.9    | 0.98     |
| 178.52 | 2035.3    | 0.89     |
| 179.50 | 2331.2    | 1.02     |
| 180.58 | 5646.4    | 2.47     |
| 181.38 | 4599.8    | 2.01     |
| 182.10 | 11059.6   | 4.83     |
| 182.93 | 8233.6    | 3.60     |
| 183.69 | 315.9     | 0.14     |
| 184.47 | 356.0     | 0.16     |
| 185.48 | 1250.4    | 0.55     |
| 186.95 | 315.5     | 0.14     |
| 188.07 | 9.1       | 0.00     |
| 188.96 | 280.2     | 0.12     |
| 189.60 | 129.2     | 0.06     |
| 190.66 | 614.6     | 0.27     |
| 191.89 | 3605.3    | 1.57     |
| 192.94 | 5554.9    | 2.43     |
| 193.79 | 3798.1    | 1.66     |
| 194.37 | 1585.6    | 0.69     |
| 195.19 | 4889.9    | 2.14     |
| 196.01 | 3397.2    | 1.48     |
| 196.55 | 4654.1    | 2.03     |
| 197.38 | 7590.2    | 3.32     |
| 198.14 | 3165.9    | 1.38     |

Hayam-142#539 RT: 1.86

T: {0,0} + c EI Full ms [50.00-600.00]

m/z= 50.00-600.03

| m/z    | Intensity | Relative |
|--------|-----------|----------|
| 198.95 | 2552.1    | 1.11     |
| 199.54 | 705.5     | 0.31     |
| 200.47 | 16.1      | 0.01     |
| 201.44 | 0.2       | 0.00     |
| 202.19 | 473.2     | 0.21     |
| 202.93 | 314.2     | 0.14     |
| 203.48 | 0.2       | 0.00     |
| 204.85 | 1716.3    | 0.75     |
| 205.52 | 239.0     | 0.10     |
| 206.25 | 1105.0    | 0.48     |
| 206.95 | 1232.1    | 0.54     |
| 208.16 | 5222.5    | 2.28     |
| 208.85 | 3585.1    | 1.57     |
| 209.54 | 9606.8    | 4.20     |
| 210.19 | 8982.8    | 3.92     |
| 211.09 | 3096.8    | 1.35     |
| 212.05 | 830.5     | 0.36     |
| 212.66 | 723.7     | 0.32     |
| 214.32 | 704.8     | 0.31     |
| 215.22 | 691.9     | 0.30     |
| 216.49 | 1037.0    | 0.45     |
| 217.41 | 416.0     | 0.18     |
| 218.07 | 1378.7    | 0.60     |
| 219.73 | 1956.0    | 0.85     |
| 220.82 | 4643.9    | 2.03     |
| 221.87 | 4736.9    | 2.07     |
| 222.62 | 3875.7    | 1.69     |
| 223.36 | 9038.0    | 3.95     |
| 224.25 | 18801.0   | 8.21     |
| 224.98 | 33652.4   | 14.70    |
| 225.84 | 6119.0    | 2.67     |
| 226.50 | 4675.5    | 2.04     |
| 227.27 | 2520.4    | 1.10     |
| 227.85 | 155.7     | 0.07     |
| 229.17 | 683.1     | 0.30     |
| 230.26 | 757.7     | 0.33     |
| 230.98 | 2258.0    | 0.99     |
| 232.08 | 6802.3    | 2.97     |
| 233.02 | 1972.1    | 0.86     |
| 234.12 | 861.3     | 0.38     |
| 234.86 | 561.8     | 0.25     |
| 235.53 | 2221.6    | 0.97     |
| 236.22 | 5980.5    | 2.61     |
| 237.11 | 8960.7    | 3.91     |
| 237.69 | 3057.0    | 1.34     |
| 238.35 | 6168.1    | 2.69     |
| 239.26 | 24665.1   | 10.77    |
| 240.02 | 47843.8   | 20.90    |
| 240.80 | 18760.7   | 8.20     |
| 241.34 | 13714.1   | 5.99     |
| 242.06 | 5669.3    | 2.48     |
| 242.72 | 491.7     | 0.21     |
| 243.24 | 658.6     | 0.29     |
| 244.13 | 10.7      | 0.00     |
| 245.19 | 13.1      | 0.01     |

Hayam-142#539 RT: 1.86

T: {0,0} + c EI Full ms [50.00-600.00]

m/z= 50.00-600.03

| m/z    | Intensity | Relative |
|--------|-----------|----------|
| 246.32 | 558.2     | 0.24     |
| 247.59 | 1444.6    | 0.63     |
| 248.54 | 646.7     | 0.28     |
| 249.56 | 1617.4    | 0.71     |
| 250.30 | 1424.9    | 0.62     |
| 251.24 | 8026.1    | 3.51     |
| 252.39 | 11820.3   | 5.16     |
| 253.10 | 10395.3   | 4.54     |
| 253.79 | 4703.4    | 2.05     |
| 254.42 | 2088.9    | 0.91     |
| 255.31 | 3298.8    | 1.44     |
| 256.16 | 2086.4    | 0.91     |
| 256.93 | 2651.0    | 1.16     |
| 257.51 | 1998.2    | 0.87     |
| 258.14 | 2374.1    | 1.04     |
| 258.73 | 5378.7    | 2.35     |
| 259.56 | 4886.7    | 2.13     |
| 260.53 | 7403.5    | 3.23     |
| 261.34 | 2788.1    | 1.22     |
| 262.52 | 9630.0    | 4.21     |
| 263.22 | 5369.8    | 2.35     |
| 263.93 | 8366.5    | 3.65     |
| 264.69 | 4959.5    | 2.17     |
| 265.52 | 19295.6   | 8.43     |
| 266.05 | 17172.5   | 7.50     |
| 266.86 | 166604.5  | 72.78    |
| 267.76 | 216163.2  | 94.43    |
| 268.49 | 163446.1  | 71.40    |
| 269.26 | 88515.2   | 38.67    |
| 270.28 | 15108.5   | 6.60     |
| 271.31 | 1401.0    | 0.61     |
| 272.21 | 908.6     | 0.40     |
| 272.86 | 0.2       | 0.00     |
| 273.85 | 6.6       | 0.00     |
| 275.57 | 45.3      | 0.02     |
| 276.22 | 0.2       | 0.00     |
| 277.40 | 10.3      | 0.00     |
| 278.06 | 0.2       | 0.00     |
| 278.60 | 4.5       | 0.00     |
| 279.25 | 859.5     | 0.38     |
| 280.44 | 549.4     | 0.24     |
| 281.09 | 0.0       | 0.00     |
| 281.63 | 245.8     | 0.11     |
| 282.89 | 0.2       | 0.00     |
| 283.50 | 184.6     | 0.08     |
| 284.16 | 0.0       | 0.00     |
| 284.93 | 35.4      | 0.02     |
| 285.95 | 0.4       | 0.00     |
| 286.61 | 0.2       | 0.00     |
| 287.58 | 0.1       | 0.00     |
| 288.74 | 507.3     | 0.22     |
| 289.25 | 0.0       | 0.00     |
| 290.60 | 7.8       | 0.00     |
| 291.35 | 0.2       | 0.00     |
| 292.08 | 0.0       | 0.00     |

Hayam-142#539 RT: 1.86

T: {0,0} + c EI Full ms [50.00-600.00]

m/z= 50.00-600.03

| m/z    | Intensity | Relative |
|--------|-----------|----------|
| 293.53 | 479.9     | 0.21     |
| 294.66 | 305.1     | 0.13     |
| 295.70 | 196.1     | 0.09     |
| 296.40 | 409.2     | 0.18     |
| 297.52 | 212.9     | 0.09     |
| 298.29 | 488.4     | 0.21     |
| 299.20 | 137.4     | 0.06     |
| 299.95 | 0.0       | 0.00     |
| 300.59 | 0.1       | 0.00     |
| 301.27 | 234.9     | 0.10     |
| 302.57 | 0.0       | 0.00     |
| 303.09 | 0.0       | 0.00     |
| 304.36 | 0.8       | 0.00     |
| 305.23 | 544.6     | 0.24     |
| 305.83 | 191.7     | 0.08     |
| 307.20 | 1.8       | 0.00     |
| 307.71 | 198.2     | 0.09     |
| 308.30 | 16.9      | 0.01     |
| 309.27 | 0.0       | 0.00     |
| 309.85 | 183.8     | 0.08     |
| 311.02 | 0.3       | 0.00     |
| 311.52 | 0.0       | 0.00     |
| 312.05 | 134.8     | 0.06     |
| 312.88 | 17.4      | 0.01     |
| 313.94 | 7.6       | 0.00     |
| 315.01 | 466.0     | 0.20     |
| 316.01 | 0.2       | 0.00     |
| 316.81 | 350.4     | 0.15     |
| 318.20 | 0.3       | 0.00     |
| 320.00 | 0.0       | 0.00     |
| 320.97 | 92.8      | 0.04     |
| 321.93 | 0.0       | 0.00     |
| 322.77 | 23.5      | 0.01     |
| 323.44 | 0.0       | 0.00     |
| 324.36 | 0.0       | 0.00     |
| 324.91 | 48.5      | 0.02     |
| 326.31 | 0.0       | 0.00     |
| 327.14 | 0.0       | 0.00     |
| 328.62 | 227.4     | 0.10     |
| 329.61 | 403.6     | 0.18     |
| 330.92 | 227.9     | 0.10     |
| 331.52 | 0.1       | 0.00     |
| 332.21 | 42.8      | 0.02     |
| 332.98 | 0.0       | 0.00     |
| 333.54 | 286.4     | 0.13     |
| 334.25 | 202.4     | 0.09     |
| 335.41 | 0.0       | 0.00     |
| 336.81 | 15.0      | 0.01     |
| 337.38 | 0.0       | 0.00     |
| 338.30 | 0.0       | 0.00     |
| 339.11 | 35.0      | 0.02     |
| 340.41 | 0.0       | 0.00     |
| 341.03 | 20.9      | 0.01     |
| 341.55 | 0.0       | 0.00     |
| 342.11 | 0.0       | 0.00     |



Hayam-142#539 RT: 1.86

T: {0,0} + c EI Full ms [50.00-600.00]

m/z= 50.00-600.03

| m/z    | Intensity | Relative |
|--------|-----------|----------|
| 343.11 | 0.6       | 0.00     |
| 344.55 | 236.5     | 0.10     |
| 345.08 | 2.5       | 0.00     |
| 345.67 | 0.4       | 0.00     |
| 346.37 | 0.9       | 0.00     |
| 347.33 | 0.0       | 0.00     |
| 348.14 | 203.1     | 0.09     |
| 349.05 | 0.4       | 0.00     |
| 350.19 | 0.0       | 0.00     |
| 351.31 | 0.1       | 0.00     |
| 352.03 | 408.8     | 0.18     |
| 353.31 | 0.2       | 0.00     |
| 353.94 | 0.0       | 0.00     |
| 354.80 | 0.1       | 0.00     |
| 355.84 | 455.5     | 0.20     |
| 356.99 | 15.1      | 0.01     |
| 357.81 | 15.3      | 0.01     |
| 358.47 | 565.3     | 0.25     |
| 359.20 | 1240.3    | 0.54     |
| 361.19 | 228.9     | 0.10     |
| 361.98 | 146.4     | 0.06     |
| 362.67 | 0.9       | 0.00     |
| 363.49 | 0.1       | 0.00     |
| 364.09 | 0.0       | 0.00     |
| 364.95 | 0.0       | 0.00     |
| 366.07 | 1.6       | 0.00     |
| 366.97 | 182.1     | 0.08     |
| 367.50 | 0.2       | 0.00     |
| 368.17 | 0.0       | 0.00     |
| 369.22 | 26.2      | 0.01     |
| 370.36 | 943.5     | 0.41     |
| 371.07 | 1.1       | 0.00     |
| 371.78 | 45.8      | 0.02     |
| 372.87 | 297.0     | 0.13     |
| 374.36 | 246.3     | 0.11     |
| 374.90 | 261.5     | 0.11     |
| 375.76 | 0.0       | 0.00     |
| 376.28 | 160.6     | 0.07     |
| 377.60 | 194.7     | 0.09     |
| 378.29 | 0.0       | 0.00     |
| 379.14 | 9.1       | 0.00     |
| 380.08 | 0.2       | 0.00     |
| 381.11 | 7.0       | 0.00     |
| 381.96 | 128.1     | 0.06     |
| 382.95 | 212.4     | 0.09     |
| 383.83 | 225.0     | 0.10     |
| 384.91 | 203.9     | 0.09     |
| 385.50 | 0.1       | 0.00     |
| 386.07 | 0.0       | 0.00     |
| 386.59 | 0.0       | 0.00     |
| 387.51 | 362.1     | 0.16     |
| 388.11 | 0.0       | 0.00     |
| 388.91 | 835.3     | 0.36     |
| 389.79 | 510.6     | 0.22     |
| 390.53 | 0.1       | 0.00     |

Hayam-142#539 RT: 1.86

T: {0,0} + c EI Full ms [50.00-600.00]

m/z= 50.00-600.03

| m/z    | Intensity | Relative |
|--------|-----------|----------|
| 391.37 | 0.0       | 0.00     |
| 392.61 | 0.1       | 0.00     |
| 393.50 | 0.0       | 0.00     |
| 394.04 | 0.1       | 0.00     |
| 394.80 | 404.1     | 0.18     |
| 395.44 | 0.0       | 0.00     |
| 395.97 | 0.3       | 0.00     |
| 397.09 | 280.7     | 0.12     |
| 397.74 | 0.2       | 0.00     |
| 398.79 | 0.6       | 0.00     |
| 399.72 | 0.8       | 0.00     |
| 400.31 | 0.1       | 0.00     |
| 401.12 | 7.8       | 0.00     |
| 401.78 | 7.0       | 0.00     |
| 402.48 | 6.9       | 0.00     |
| 403.41 | 18.6      | 0.01     |
| 404.16 | 0.0       | 0.00     |
| 404.98 | 172.0     | 0.08     |
| 406.02 | 0.0       | 0.00     |
| 406.83 | 0.3       | 0.00     |
| 407.70 | 1.3       | 0.00     |
| 408.99 | 203.8     | 0.09     |
| 409.89 | 205.7     | 0.09     |
| 410.69 | 0.0       | 0.00     |
| 411.57 | 0.2       | 0.00     |
| 412.79 | 0.3       | 0.00     |
| 413.59 | 13.2      | 0.01     |
| 414.31 | 152.3     | 0.07     |
| 415.88 | 136.6     | 0.06     |
| 416.89 | 0.5       | 0.00     |
| 417.60 | 0.0       | 0.00     |
| 418.55 | 15.8      | 0.01     |
| 419.41 | 0.0       | 0.00     |
| 420.97 | 129.6     | 0.06     |
| 421.88 | 1.4       | 0.00     |
| 422.39 | 150.2     | 0.07     |
| 423.79 | 3.4       | 0.00     |
| 424.98 | 176.8     | 0.08     |
| 425.55 | 37.7      | 0.02     |
| 426.35 | 8.1       | 0.00     |
| 427.29 | 0.0       | 0.00     |
| 427.99 | 0.0       | 0.00     |
| 429.04 | 0.0       | 0.00     |
| 429.56 | 0.0       | 0.00     |
| 430.38 | 0.2       | 0.00     |
| 431.19 | 0.0       | 0.00     |
| 432.32 | 11.8      | 0.01     |
| 433.32 | 180.1     | 0.08     |
| 433.99 | 235.7     | 0.10     |
| 434.58 | 48.4      | 0.02     |
| 435.12 | 0.0       | 0.00     |
| 436.08 | 0.1       | 0.00     |
| 436.86 | 0.2       | 0.00     |
| 437.61 | 0.0       | 0.00     |
| 438.29 | 0.2       | 0.00     |

Hayam-142#539 RT: 1.86

T: {0,0} + c EI Full ms [50.00-600.00]

m/z= 50.00-600.03

| m/z    | Intensity | Relative |
|--------|-----------|----------|
| 438.89 | 0.0       | 0.00     |
| 439.39 | 0.0       | 0.00     |
| 440.04 | 0.1       | 0.00     |
| 441.21 | 455.3     | 0.20     |
| 441.99 | 0.0       | 0.00     |
| 442.49 | 0.0       | 0.00     |
| 443.56 | 0.2       | 0.00     |
| 444.27 | 17.8      | 0.01     |
| 445.76 | 0.1       | 0.00     |
| 446.35 | 264.9     | 0.12     |
| 447.16 | 40.0      | 0.02     |
| 447.75 | 0.0       | 0.00     |
| 448.49 | 201.8     | 0.09     |
| 449.29 | 0.0       | 0.00     |
| 450.10 | 159.1     | 0.07     |
| 451.26 | 0.1       | 0.00     |
| 452.17 | 0.0       | 0.00     |
| 453.19 | 20.2      | 0.01     |
| 454.65 | 30.9      | 0.01     |
| 455.77 | 176.3     | 0.08     |
| 456.29 | 0.2       | 0.00     |
| 456.91 | 235.0     | 0.10     |
| 457.98 | 0.1       | 0.00     |
| 459.07 | 239.6     | 0.10     |
| 460.22 | 468.7     | 0.20     |
| 460.87 | 0.3       | 0.00     |
| 461.93 | 0.1       | 0.00     |
| 463.26 | 1171.1    | 0.51     |
| 464.27 | 0.1       | 0.00     |
| 464.95 | 0.1       | 0.00     |
| 465.54 | 0.1       | 0.00     |
| 466.16 | 0.2       | 0.00     |
| 467.50 | 209.3     | 0.09     |
| 468.16 | 129.4     | 0.06     |
| 468.91 | 34.5      | 0.02     |
| 469.64 | 36.8      | 0.02     |
| 470.62 | 28.8      | 0.01     |
| 471.59 | 0.2       | 0.00     |
| 472.52 | 14.8      | 0.01     |
| 473.43 | 468.5     | 0.20     |
| 474.64 | 0.0       | 0.00     |
| 475.31 | 144.3     | 0.06     |
| 475.92 | 0.1       | 0.00     |
| 476.44 | 207.6     | 0.09     |
| 477.25 | 254.0     | 0.11     |
| 478.16 | 315.9     | 0.14     |
| 478.92 | 0.0       | 0.00     |
| 480.45 | 172.7     | 0.08     |
| 481.43 | 0.4       | 0.00     |
| 482.01 | 27.6      | 0.01     |
| 483.34 | 0.2       | 0.00     |
| 484.09 | 0.5       | 0.00     |
| 484.75 | 0.3       | 0.00     |
| 485.56 | 0.1       | 0.00     |
| 486.17 | 0.0       | 0.00     |

Hayam-142#539 RT: 1.86

T: {0,0} + c EI Full ms [50.00-600.00]

m/z= 50.00-600.03

| m/z    | Intensity | Relative |
|--------|-----------|----------|
| 486.83 | 0.2       | 0.00     |
| 487.49 | 0.1       | 0.00     |
| 488.12 | 0.2       | 0.00     |
| 489.86 | 552.0     | 0.24     |
| 490.79 | 0.2       | 0.00     |
| 491.37 | 18.2      | 0.01     |
| 492.57 | 0.0       | 0.00     |
| 493.23 | 115.7     | 0.05     |
| 494.23 | 272.5     | 0.12     |
| 495.21 | 0.0       | 0.00     |
| 495.98 | 17.4      | 0.01     |
| 496.75 | 0.1       | 0.00     |
| 497.32 | 0.0       | 0.00     |
| 498.35 | 8.2       | 0.00     |
| 499.52 | 102.0     | 0.04     |
| 500.07 | 0.1       | 0.00     |
| 500.92 | 0.0       | 0.00     |
| 501.54 | 3.8       | 0.00     |
| 502.10 | 0.0       | 0.00     |
| 503.09 | 11.3      | 0.00     |
| 503.77 | 13.8      | 0.01     |
| 504.88 | 234.8     | 0.10     |
| 506.06 | 18.2      | 0.01     |
| 507.24 | 234.7     | 0.10     |
| 508.63 | 0.0       | 0.00     |
| 509.59 | 0.8       | 0.00     |
| 511.43 | 149.2     | 0.07     |
| 512.56 | 20.8      | 0.01     |
| 513.80 | 0.0       | 0.00     |
| 514.78 | 10.7      | 0.00     |
| 516.30 | 0.0       | 0.00     |
| 517.05 | 0.0       | 0.00     |
| 517.84 | 0.1       | 0.00     |
| 519.53 | 0.1       | 0.00     |
| 520.43 | 0.4       | 0.00     |
| 521.19 | 0.1       | 0.00     |
| 522.37 | 10.8      | 0.00     |
| 523.33 | 29.8      | 0.01     |
| 523.85 | 97.0      | 0.04     |
| 524.63 | 195.3     | 0.09     |
| 525.41 | 0.0       | 0.00     |
| 526.47 | 0.2       | 0.00     |
| 527.75 | 0.0       | 0.00     |
| 528.40 | 0.0       | 0.00     |
| 529.43 | 25.7      | 0.01     |
| 530.50 | 24.9      | 0.01     |
| 531.49 | 13.5      | 0.01     |
| 532.01 | 0.0       | 0.00     |
| 532.53 | 23.8      | 0.01     |
| 533.82 | 0.0       | 0.00     |
| 534.76 | 2.9       | 0.00     |
| 535.33 | 0.1       | 0.00     |
| 536.48 | 321.6     | 0.14     |
| 537.31 | 0.1       | 0.00     |
| 538.36 | 0.3       | 0.00     |

Hayam-142#539 RT: 1.86

T: {0,0} + c EI Full ms [50.00-600.00]

m/z= 50.00-600.03

| m/z    | Intensity | Relative |
|--------|-----------|----------|
| 539.12 | 161.3     | 0.07     |
| 540.10 | 9.8       | 0.00     |
| 540.71 | 6.5       | 0.00     |
| 541.94 | 233.1     | 0.10     |
| 543.09 | 27.7      | 0.01     |
| 543.74 | 0.0       | 0.00     |
| 544.48 | 31.4      | 0.01     |
| 545.36 | 0.9       | 0.00     |
| 546.39 | 6.5       | 0.00     |
| 547.56 | 171.5     | 0.07     |
| 548.57 | 0.2       | 0.00     |
| 549.13 | 0.8       | 0.00     |
| 550.04 | 7.4       | 0.00     |
| 550.95 | 0.9       | 0.00     |
| 551.94 | 9.0       | 0.00     |
| 552.85 | 0.0       | 0.00     |
| 554.06 | 0.0       | 0.00     |
| 555.03 | 0.0       | 0.00     |
| 555.95 | 0.0       | 0.00     |
| 556.45 | 9.1       | 0.00     |
| 557.17 | 0.1       | 0.00     |
| 558.06 | 0.3       | 0.00     |
| 558.75 | 0.0       | 0.00     |
| 559.45 | 0.2       | 0.00     |
| 560.22 | 8.1       | 0.00     |
| 560.88 | 0.1       | 0.00     |
| 562.07 | 0.6       | 0.00     |
| 562.64 | 0.5       | 0.00     |
| 563.21 | 14.9      | 0.01     |
| 564.06 | 244.3     | 0.11     |
| 565.17 | 0.0       | 0.00     |
| 566.08 | 0.1       | 0.00     |
| 566.72 | 6.4       | 0.00     |
| 567.54 | 0.1       | 0.00     |
| 568.23 | 0.4       | 0.00     |
| 568.74 | 0.1       | 0.00     |
| 570.11 | 0.6       | 0.00     |
| 570.94 | 205.2     | 0.09     |
| 571.59 | 0.2       | 0.00     |
| 572.22 | 226.5     | 0.10     |
| 573.15 | 428.0     | 0.19     |
| 573.81 | 106.1     | 0.05     |
| 574.57 | 2.6       | 0.00     |
| 575.51 | 0.1       | 0.00     |
| 576.29 | 8.5       | 0.00     |
| 577.99 | 12.3      | 0.01     |
| 579.27 | 0.1       | 0.00     |
| 579.84 | 4.4       | 0.00     |
| 580.53 | 0.0       | 0.00     |
| 581.14 | 0.0       | 0.00     |
| 582.12 | 177.6     | 0.08     |
| 582.73 | 0.0       | 0.00     |
| 584.13 | 235.3     | 0.10     |
| 584.68 | 320.0     | 0.14     |
| 585.46 | 0.0       | 0.00     |

Hayam-142#539 RT: 1.86

T: {0,0} + c EI Full ms [50.00-600.00]

m/z= 50.00-600.03

| m/z    | Intensity | Relative |
|--------|-----------|----------|
| 585.96 | 0.0       | 0.00     |
| 586.49 | 154.2     | 0.07     |
| 587.24 | 0.1       | 0.00     |
| 588.03 | 0.6       | 0.00     |
| 588.54 | 116.8     | 0.05     |
| 589.09 | 0.0       | 0.00     |
| 590.03 | 0.0       | 0.00     |
| 590.54 | 2.3       | 0.00     |
| 591.34 | 7.8       | 0.00     |
| 591.90 | 0.4       | 0.00     |
| 592.52 | 189.5     | 0.08     |
| 593.82 | 1.0       | 0.00     |
| 594.56 | 222.9     | 0.10     |
| 596.82 | 267.7     | 0.12     |
| 597.52 | 94.9      | 0.04     |
| 598.11 | 0.0       | 0.00     |
| 598.64 | 0.1       | 0.00     |
| 599.45 | 0.1       | 0.00     |
| 599.98 | 123.1     | 0.05     |
