# Supplementary material for: A Simple and Efficient Multicomponent Synthesis of Novel Pyrazole, N-aminopyridine and Pyrazolo[3,4-b]Pyridine Derivatives in Water
Source: Preprints.org preprint supplement (doi:10.20944/preprints202312.1232.v1), 2023-12-28
Supplement: Supplementary file 20 [file supplementary]

RT: 0.00 - 4.21

NL:  
1.29E5  
TIC MS  
Selwan-62

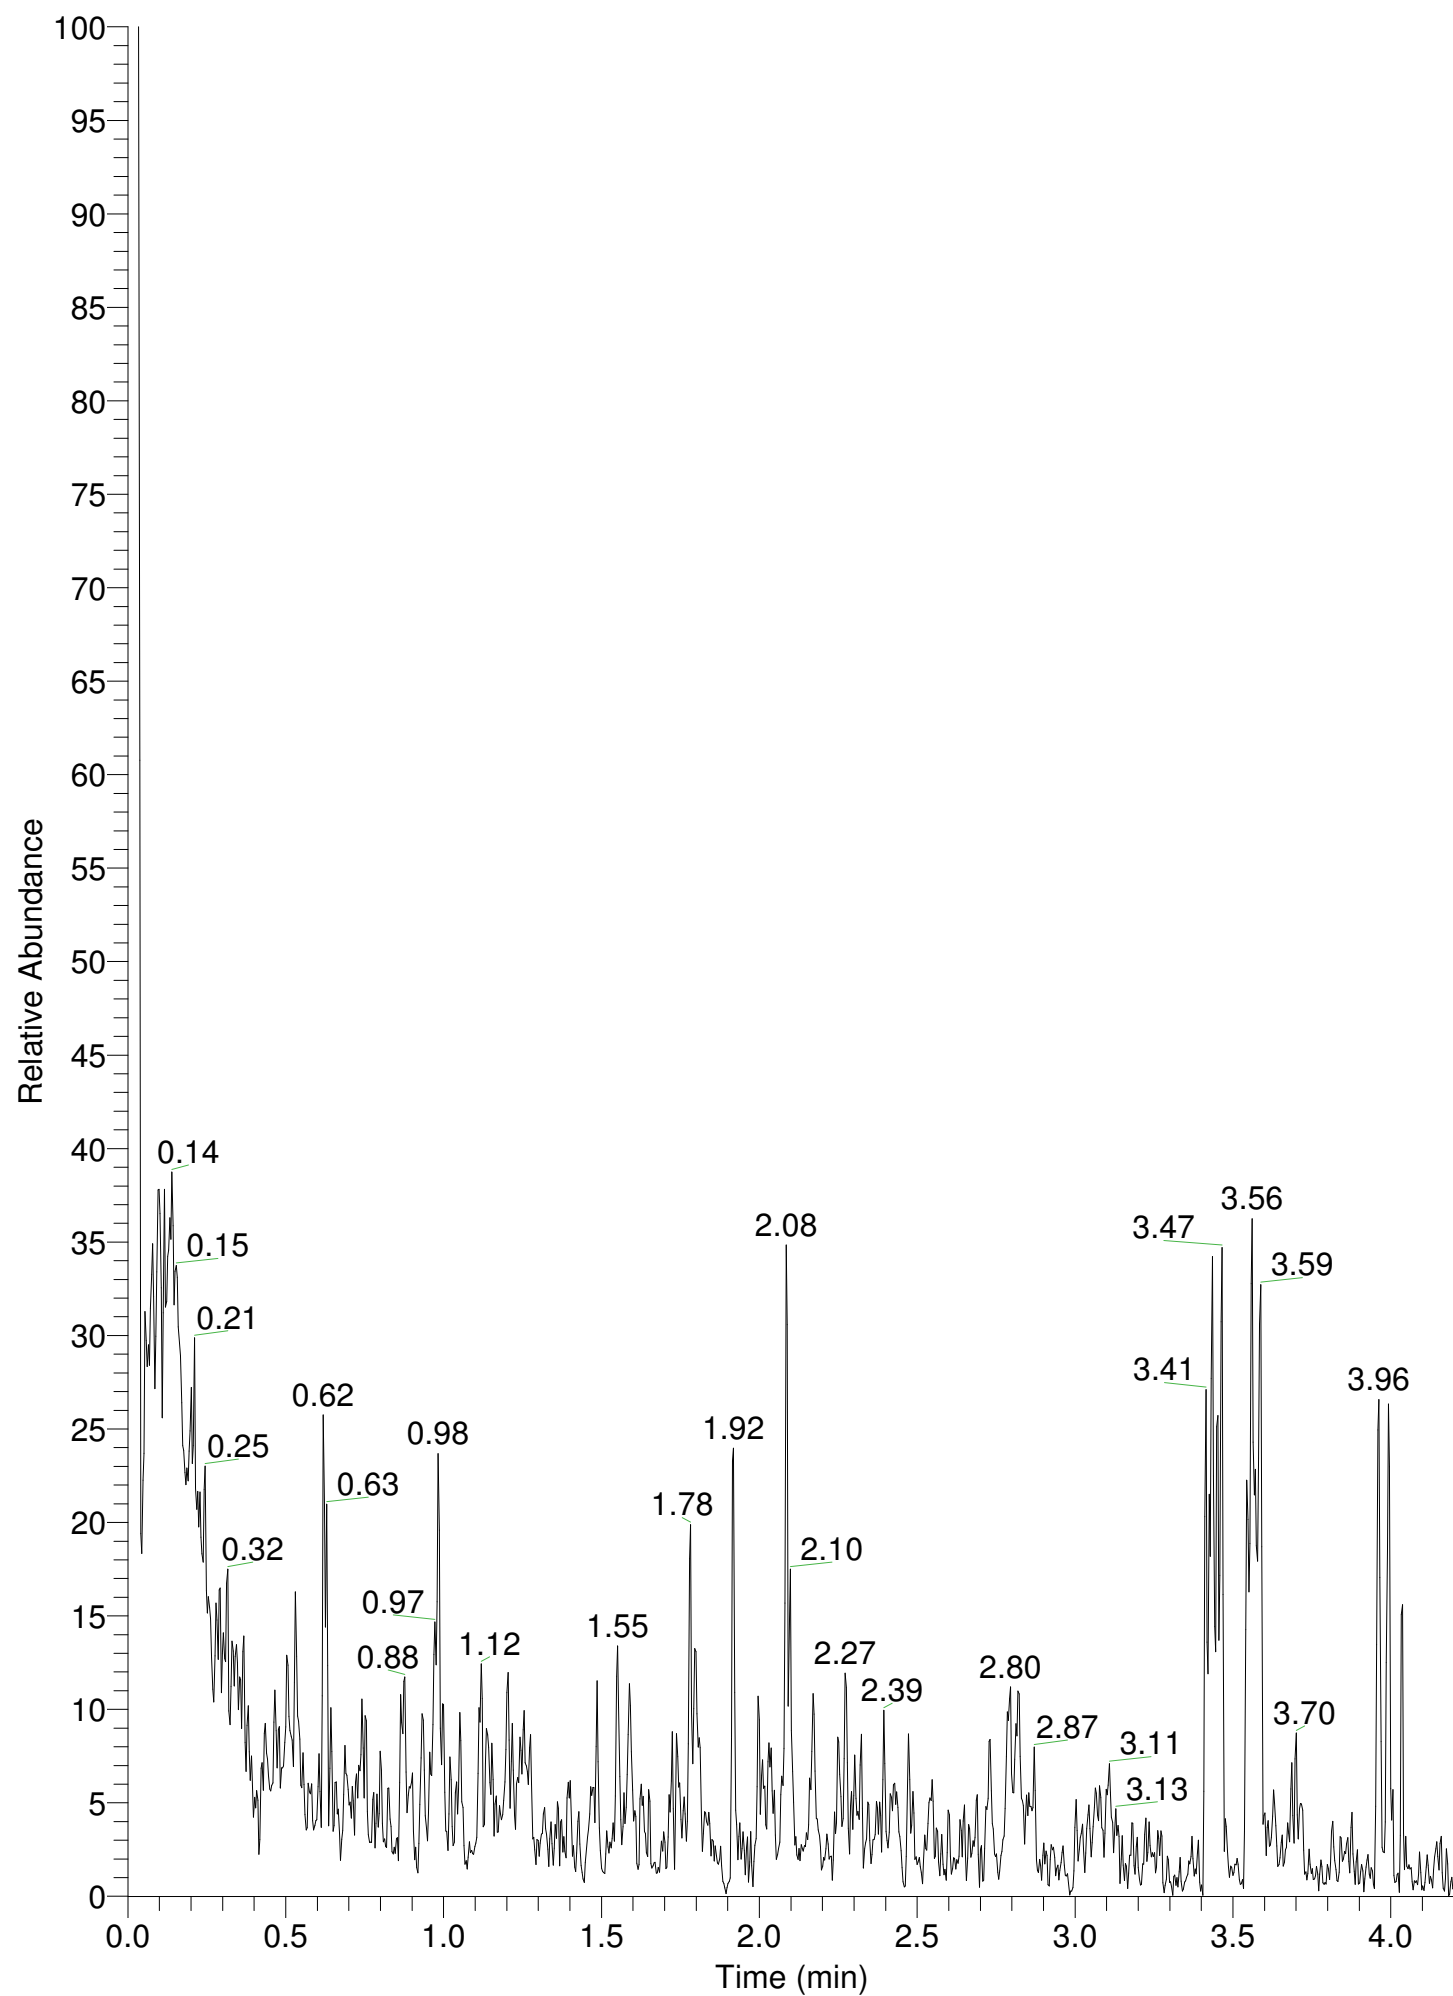

Selwan-62 #83 RT: 0.31 AV: 1 NL: 1.28E4

T: {0,0} + c EI Full ms [50.00-1000.00]

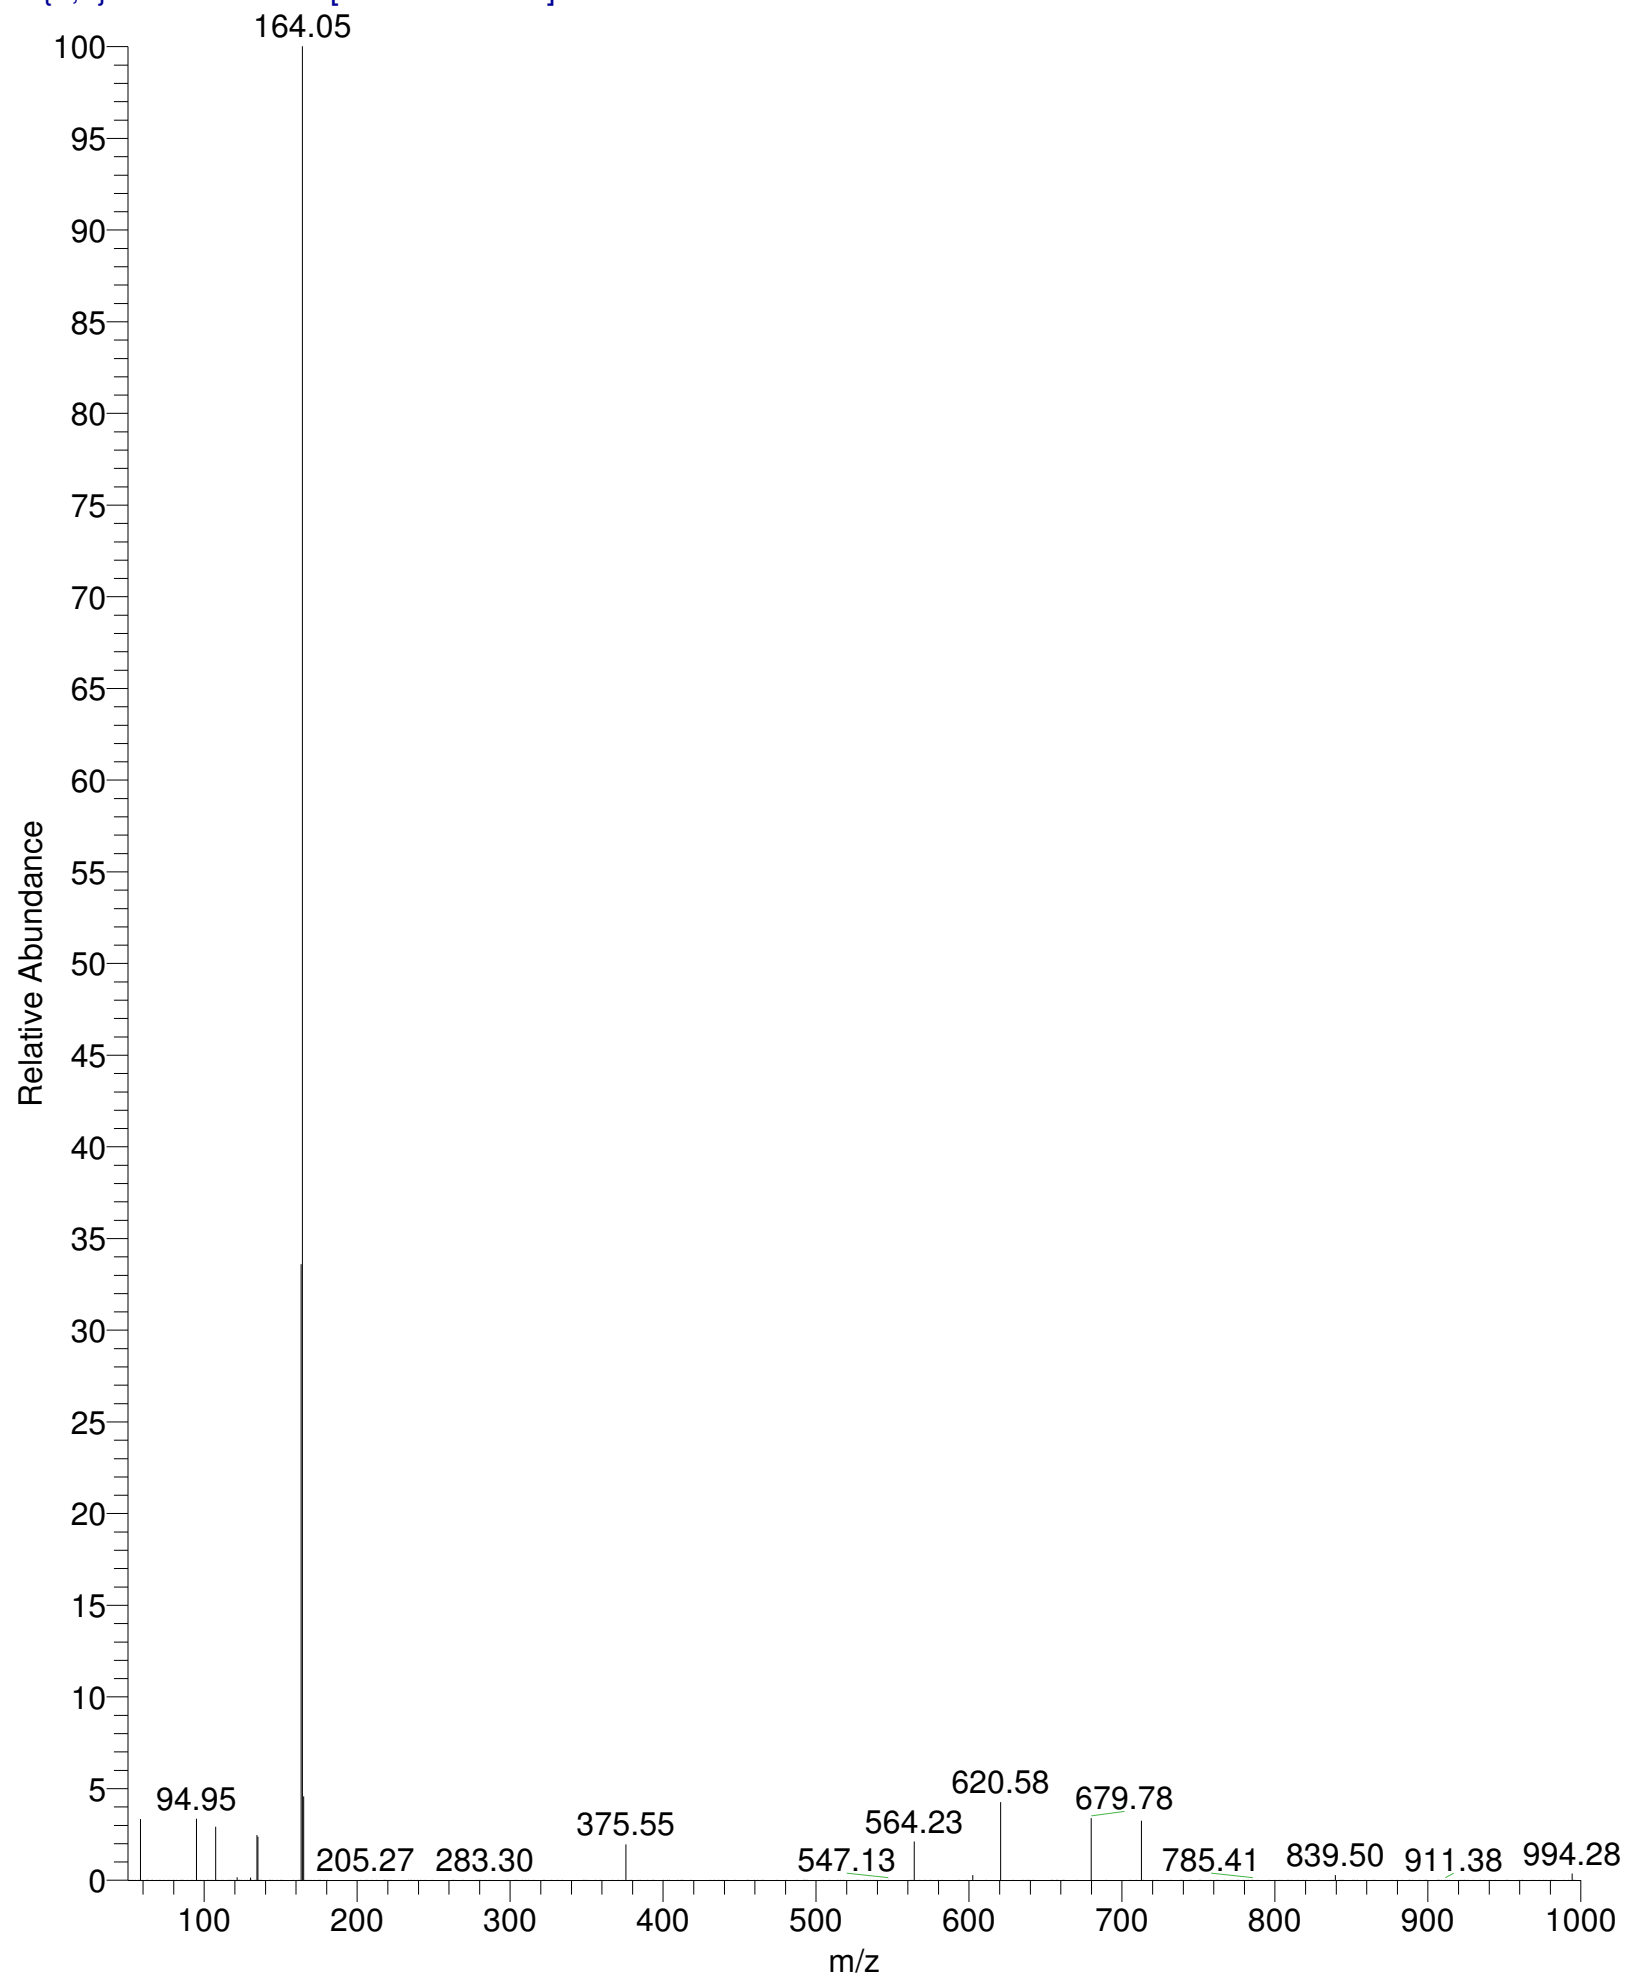

Selwan-62#83 RT: 0.31

T: {0,0} + c EI Full ms [50.00-1000.00]

m/z= 50.00-1000.04

| m/z    | Intensity | Relative |
|--------|-----------|----------|
| 50.69  | 0.0       | 0.00     |
| 51.42  | 0.0       | 0.00     |
| 52.56  | 0.0       | 0.00     |
| 53.27  | 0.0       | 0.00     |
| 54.89  | 0.0       | 0.00     |
| 56.63  | 0.0       | 0.00     |
| 57.44  | 0.0       | 0.00     |
| 58.36  | 425.1     | 3.32     |
| 59.44  | 0.1       | 0.00     |
| 62.02  | 0.0       | 0.00     |
| 62.67  | 0.0       | 0.00     |
| 63.25  | 0.0       | 0.00     |
| 65.49  | 0.0       | 0.00     |
| 66.13  | 0.0       | 0.00     |
| 68.86  | 0.0       | 0.00     |
| 70.51  | 0.0       | 0.00     |
| 71.75  | 0.0       | 0.00     |
| 73.65  | 0.0       | 0.00     |
| 76.16  | 0.0       | 0.00     |
| 77.32  | 0.0       | 0.00     |
| 79.45  | 0.0       | 0.00     |
| 80.21  | 0.0       | 0.00     |
| 81.93  | 0.0       | 0.00     |
| 84.60  | 0.0       | 0.00     |
| 85.21  | 0.3       | 0.00     |
| 86.37  | 0.0       | 0.00     |
| 89.01  | 0.0       | 0.00     |
| 91.28  | 0.0       | 0.00     |
| 92.56  | 0.1       | 0.00     |
| 94.95  | 428.5     | 3.35     |
| 95.96  | 0.0       | 0.00     |
| 97.51  | 0.0       | 0.00     |
| 99.37  | 0.0       | 0.00     |
| 101.98 | 0.0       | 0.00     |
| 102.54 | 0.0       | 0.00     |
| 104.23 | 0.0       | 0.00     |
| 105.58 | 0.0       | 0.00     |
| 107.44 | 371.5     | 2.90     |
| 108.32 | 0.0       | 0.00     |
| 109.15 | 0.0       | 0.00     |
| 111.10 | 0.0       | 0.00     |
| 112.37 | 0.0       | 0.00     |
| 115.45 | 0.0       | 0.00     |
| 116.71 | 0.0       | 0.00     |
| 117.95 | 0.0       | 0.00     |
| 119.24 | 0.0       | 0.00     |
| 121.43 | 19.3      | 0.15     |
| 121.98 | 0.0       | 0.00     |
| 122.70 | 0.0       | 0.00     |
| 123.25 | 0.0       | 0.00     |
| 124.46 | 0.0       | 0.00     |
| 126.74 | 0.0       | 0.00     |
| 128.14 | 0.0       | 0.00     |
| 129.40 | 0.0       | 0.00     |
| 130.23 | 17.4      | 0.14     |

Selwan-62#83 RT: 0.31

T: {0,0} + c EI Full ms [50.00-1000.00]

m/z= 50.00-1000.04

| m/z    | Intensity | Relative |
|--------|-----------|----------|
| 130.96 | 0.0       | 0.00     |
| 133.02 | 0.0       | 0.00     |
| 133.67 | 0.0       | 0.00     |
| 134.36 | 313.0     | 2.44     |
| 134.94 | 303.4     | 2.37     |
| 135.70 | 0.3       | 0.00     |
| 136.42 | 0.0       | 0.00     |
| 137.43 | 0.1       | 0.00     |
| 142.78 | 0.0       | 0.00     |
| 143.51 | 0.0       | 0.00     |
| 144.63 | 0.0       | 0.00     |
| 147.63 | 0.0       | 0.00     |
| 149.80 | 0.3       | 0.00     |
| 151.14 | 0.0       | 0.00     |
| 158.22 | 0.0       | 0.00     |
| 161.24 | 0.0       | 0.00     |
| 162.29 | 0.0       | 0.00     |
| 163.21 | 4300.3    | 33.58    |
| 164.05 | 12805.7   | 100.00   |
| 164.96 | 585.4     | 4.57     |
| 166.00 | 0.0       | 0.00     |
| 167.32 | 0.0       | 0.00     |
| 168.47 | 0.0       | 0.00     |
| 169.81 | 0.0       | 0.00     |
| 171.94 | 0.0       | 0.00     |
| 174.38 | 0.0       | 0.00     |
| 175.23 | 0.0       | 0.00     |
| 175.95 | 0.0       | 0.00     |
| 178.61 | 0.0       | 0.00     |
| 180.37 | 0.0       | 0.00     |
| 202.40 | 0.0       | 0.00     |
| 205.27 | 0.3       | 0.00     |
| 206.76 | 0.0       | 0.00     |
| 209.47 | 0.0       | 0.00     |
| 212.75 | 0.0       | 0.00     |
| 217.48 | 0.0       | 0.00     |
| 218.01 | 0.0       | 0.00     |
| 218.74 | 0.0       | 0.00     |
| 220.90 | 0.2       | 0.00     |
| 222.10 | 0.0       | 0.00     |
| 233.54 | 0.0       | 0.00     |
| 234.75 | 0.0       | 0.00     |
| 235.31 | 0.0       | 0.00     |
| 237.14 | 0.0       | 0.00     |
| 239.36 | 0.0       | 0.00     |
| 241.43 | 0.0       | 0.00     |
| 244.44 | 0.0       | 0.00     |
| 248.89 | 0.0       | 0.00     |
| 262.43 | 0.0       | 0.00     |
| 263.44 | 0.0       | 0.00     |
| 269.25 | 0.0       | 0.00     |
| 277.74 | 0.0       | 0.00     |
| 279.58 | 0.0       | 0.00     |
| 280.83 | 0.0       | 0.00     |
| 283.30 | 0.3       | 0.00     |

Selwan-62#83 RT: 0.31

T: {0,0} + c EI Full ms [50.00-1000.00]

m/z= 50.00-1000.04

| m/z    | Intensity | Relative |
|--------|-----------|----------|
| 286.54 | 0.0       | 0.00     |
| 298.27 | 0.0       | 0.00     |
| 303.10 | 0.0       | 0.00     |
| 304.31 | 0.0       | 0.00     |
| 307.99 | 0.0       | 0.00     |
| 310.05 | 0.0       | 0.00     |
| 311.92 | 0.0       | 0.00     |
| 315.53 | 0.0       | 0.00     |
| 321.82 | 0.0       | 0.00     |
| 322.78 | 0.0       | 0.00     |
| 327.03 | 0.0       | 0.00     |
| 331.13 | 0.0       | 0.00     |
| 334.07 | 0.0       | 0.00     |
| 347.75 | 0.0       | 0.00     |
| 348.78 | 0.0       | 0.00     |
| 350.32 | 0.0       | 0.00     |
| 355.74 | 0.0       | 0.00     |
| 358.82 | 0.0       | 0.00     |
| 366.90 | 0.0       | 0.00     |
| 370.71 | 0.0       | 0.00     |
| 373.62 | 0.0       | 0.00     |
| 375.55 | 249.7     | 1.95     |
| 378.27 | 0.0       | 0.00     |
| 379.48 | 0.0       | 0.00     |
| 383.59 | 0.0       | 0.00     |
| 384.97 | 0.0       | 0.00     |
| 389.85 | 0.0       | 0.00     |
| 392.93 | 0.0       | 0.00     |
| 393.85 | 0.0       | 0.00     |
| 400.14 | 0.1       | 0.00     |
| 402.78 | 0.0       | 0.00     |
| 404.08 | 0.0       | 0.00     |
| 409.55 | 0.0       | 0.00     |
| 411.65 | 0.0       | 0.00     |
| 412.76 | 0.0       | 0.00     |
| 418.01 | 0.0       | 0.00     |
| 430.90 | 0.0       | 0.00     |
| 433.56 | 0.0       | 0.00     |
| 436.32 | 0.0       | 0.00     |
| 438.93 | 0.0       | 0.00     |
| 441.48 | 0.0       | 0.00     |
| 447.08 | 0.0       | 0.00     |
| 454.84 | 0.0       | 0.00     |
| 455.53 | 0.0       | 0.00     |
| 459.76 | 0.0       | 0.00     |
| 461.74 | 0.0       | 0.00     |
| 464.65 | 0.0       | 0.00     |
| 465.34 | 0.0       | 0.00     |
| 474.31 | 0.0       | 0.00     |
| 480.46 | 0.0       | 0.00     |
| 487.29 | 0.0       | 0.00     |
| 491.84 | 0.0       | 0.00     |
| 492.57 | 0.0       | 0.00     |
| 493.28 | 0.0       | 0.00     |
| 494.50 | 0.0       | 0.00     |

Selwan-62#83 RT: 0.31

T: {0,0} + c EI Full ms [50.00-1000.00]

m/z= 50.00-1000.04

| m/z    | Intensity | Relative |
|--------|-----------|----------|
| 504.39 | 0.0       | 0.00     |
| 508.76 | 0.0       | 0.00     |
| 514.17 | 0.0       | 0.00     |
| 516.00 | 0.0       | 0.00     |
| 517.94 | 0.0       | 0.00     |
| 526.19 | 0.0       | 0.00     |
| 527.50 | 0.0       | 0.00     |
| 528.14 | 0.0       | 0.00     |
| 531.70 | 0.0       | 0.00     |
| 533.27 | 0.0       | 0.00     |
| 535.64 | 0.0       | 0.00     |
| 537.58 | 0.0       | 0.00     |
| 539.87 | 0.0       | 0.00     |
| 542.29 | 0.0       | 0.00     |
| 547.13 | 0.1       | 0.00     |
| 561.38 | 0.0       | 0.00     |
| 562.76 | 0.0       | 0.00     |
| 564.23 | 269.4     | 2.10     |
| 567.71 | 0.0       | 0.00     |
| 571.28 | 0.0       | 0.00     |
| 574.77 | 0.1       | 0.00     |
| 579.77 | 0.0       | 0.00     |
| 582.46 | 0.0       | 0.00     |
| 593.49 | 0.4       | 0.00     |
| 598.60 | 0.0       | 0.00     |
| 602.43 | 33.8      | 0.26     |
| 611.28 | 0.0       | 0.00     |
| 620.58 | 543.6     | 4.24     |
| 628.53 | 0.0       | 0.00     |
| 635.20 | 0.0       | 0.00     |
| 638.06 | 0.0       | 0.00     |
| 639.47 | 0.0       | 0.00     |
| 642.00 | 0.1       | 0.00     |
| 653.96 | 0.0       | 0.00     |
| 654.65 | 0.0       | 0.00     |
| 657.16 | 0.0       | 0.00     |
| 657.98 | 0.1       | 0.00     |
| 661.12 | 0.0       | 0.00     |
| 661.97 | 0.0       | 0.00     |
| 670.47 | 0.0       | 0.00     |
| 679.78 | 432.4     | 3.38     |
| 689.66 | 0.0       | 0.00     |
| 705.59 | 0.0       | 0.00     |
| 709.25 | 0.0       | 0.00     |
| 712.66 | 415.3     | 3.24     |
| 714.02 | 0.0       | 0.00     |
| 720.22 | 0.0       | 0.00     |
| 722.86 | 0.0       | 0.00     |
| 731.94 | 0.0       | 0.00     |
| 738.48 | 0.0       | 0.00     |
| 739.22 | 0.0       | 0.00     |
| 744.58 | 0.0       | 0.00     |
| 745.18 | 0.0       | 0.00     |
| 750.54 | 0.0       | 0.00     |
| 751.47 | 0.0       | 0.00     |

Selwan-62#83 RT: 0.31

T: {0,0} + c EI Full ms [50.00-1000.00]

m/z= 50.00-1000.04

| m/z    | Intensity | Relative |
|--------|-----------|----------|
| 758.09 | 0.0       | 0.00     |
| 761.96 | 0.0       | 0.00     |
| 762.60 | 0.0       | 0.00     |
| 766.82 | 0.0       | 0.00     |
| 771.05 | 0.0       | 0.00     |
| 772.60 | 0.0       | 0.00     |
| 775.55 | 0.0       | 0.00     |
| 776.35 | 0.0       | 0.00     |
| 779.18 | 0.0       | 0.00     |
| 781.58 | 0.0       | 0.00     |
| 782.76 | 0.0       | 0.00     |
| 784.86 | 0.0       | 0.00     |
| 785.41 | 0.2       | 0.00     |
| 788.64 | 0.0       | 0.00     |
| 795.98 | 0.0       | 0.00     |
| 799.90 | 0.0       | 0.00     |
| 802.70 | 0.0       | 0.00     |
| 804.31 | 0.0       | 0.00     |
| 808.11 | 0.0       | 0.00     |
| 808.91 | 0.0       | 0.00     |
| 810.71 | 0.0       | 0.00     |
| 814.69 | 0.0       | 0.00     |
| 818.39 | 0.0       | 0.00     |
| 820.35 | 0.0       | 0.00     |
| 828.65 | 0.0       | 0.00     |
| 837.01 | 0.0       | 0.00     |
| 838.37 | 0.0       | 0.00     |
| 839.50 | 34.8      | 0.27     |
| 842.48 | 0.0       | 0.00     |
| 843.50 | 0.0       | 0.00     |
| 844.77 | 0.2       | 0.00     |
| 850.68 | 0.0       | 0.00     |
| 851.73 | 0.0       | 0.00     |
| 853.85 | 0.0       | 0.00     |
| 858.82 | 0.0       | 0.00     |
| 864.07 | 0.2       | 0.00     |
| 865.51 | 0.0       | 0.00     |
| 876.46 | 0.0       | 0.00     |
| 880.15 | 0.0       | 0.00     |
| 883.26 | 0.0       | 0.00     |
| 887.50 | 0.0       | 0.00     |
| 888.19 | 0.0       | 0.00     |
| 889.99 | 0.0       | 0.00     |
| 894.45 | 0.0       | 0.00     |
| 898.24 | 0.0       | 0.00     |
| 898.88 | 0.0       | 0.00     |
| 906.22 | 0.0       | 0.00     |
| 906.77 | 0.0       | 0.00     |
| 907.45 | 0.0       | 0.00     |
| 908.92 | 0.0       | 0.00     |
| 911.38 | 0.0       | 0.00     |
| 912.73 | 0.0       | 0.00     |
| 913.98 | 0.0       | 0.00     |
| 920.90 | 0.0       | 0.00     |
| 922.20 | 0.0       | 0.00     |

Selwan-62#83 RT: 0.31

T: {0,0} + c EI Full ms [50.00-1000.00]

m/z= 50.00-1000.04

| m/z    | Intensity | Relative |
|--------|-----------|----------|
| 923.61 | 0.0       | 0.00     |
| 924.16 | 0.0       | 0.00     |
| 926.07 | 0.0       | 0.00     |
| 929.94 | 0.0       | 0.00     |
| 934.31 | 0.0       | 0.00     |
| 936.94 | 0.0       | 0.00     |
| 940.46 | 0.0       | 0.00     |
| 944.25 | 0.0       | 0.00     |
| 951.28 | 0.0       | 0.00     |
| 952.27 | 0.0       | 0.00     |
| 959.26 | 0.0       | 0.00     |
| 961.34 | 0.0       | 0.00     |
| 961.93 | 0.0       | 0.00     |
| 967.93 | 0.0       | 0.00     |
| 969.54 | 0.0       | 0.00     |
| 972.83 | 0.0       | 0.00     |
| 975.72 | 0.0       | 0.00     |
| 977.32 | 0.0       | 0.00     |
| 980.41 | 0.0       | 0.00     |
| 981.14 | 0.0       | 0.00     |
| 982.76 | 0.0       | 0.00     |
| 988.90 | 0.0       | 0.00     |
| 992.00 | 0.0       | 0.00     |
| 994.28 | 46.8      | 0.37     |
| 995.18 | 0.0       | 0.00     |
| 996.12 | 0.0       | 0.00     |
