# Supplementary material for: A Simple and Efficient Multicomponent Synthesis of Novel Pyrazole, N-aminopyridine and Pyrazolo[3,4-b]Pyridine Derivatives in Water
Source: Preprints.org preprint supplement (doi:10.20944/preprints202312.1232.v1), 2023-12-28
Supplement: Supplementary file 24 [file supplementary]

RT: 0.00 - 4.22

NL:  
1.96E6  
TIC MS  
Selwan-42A

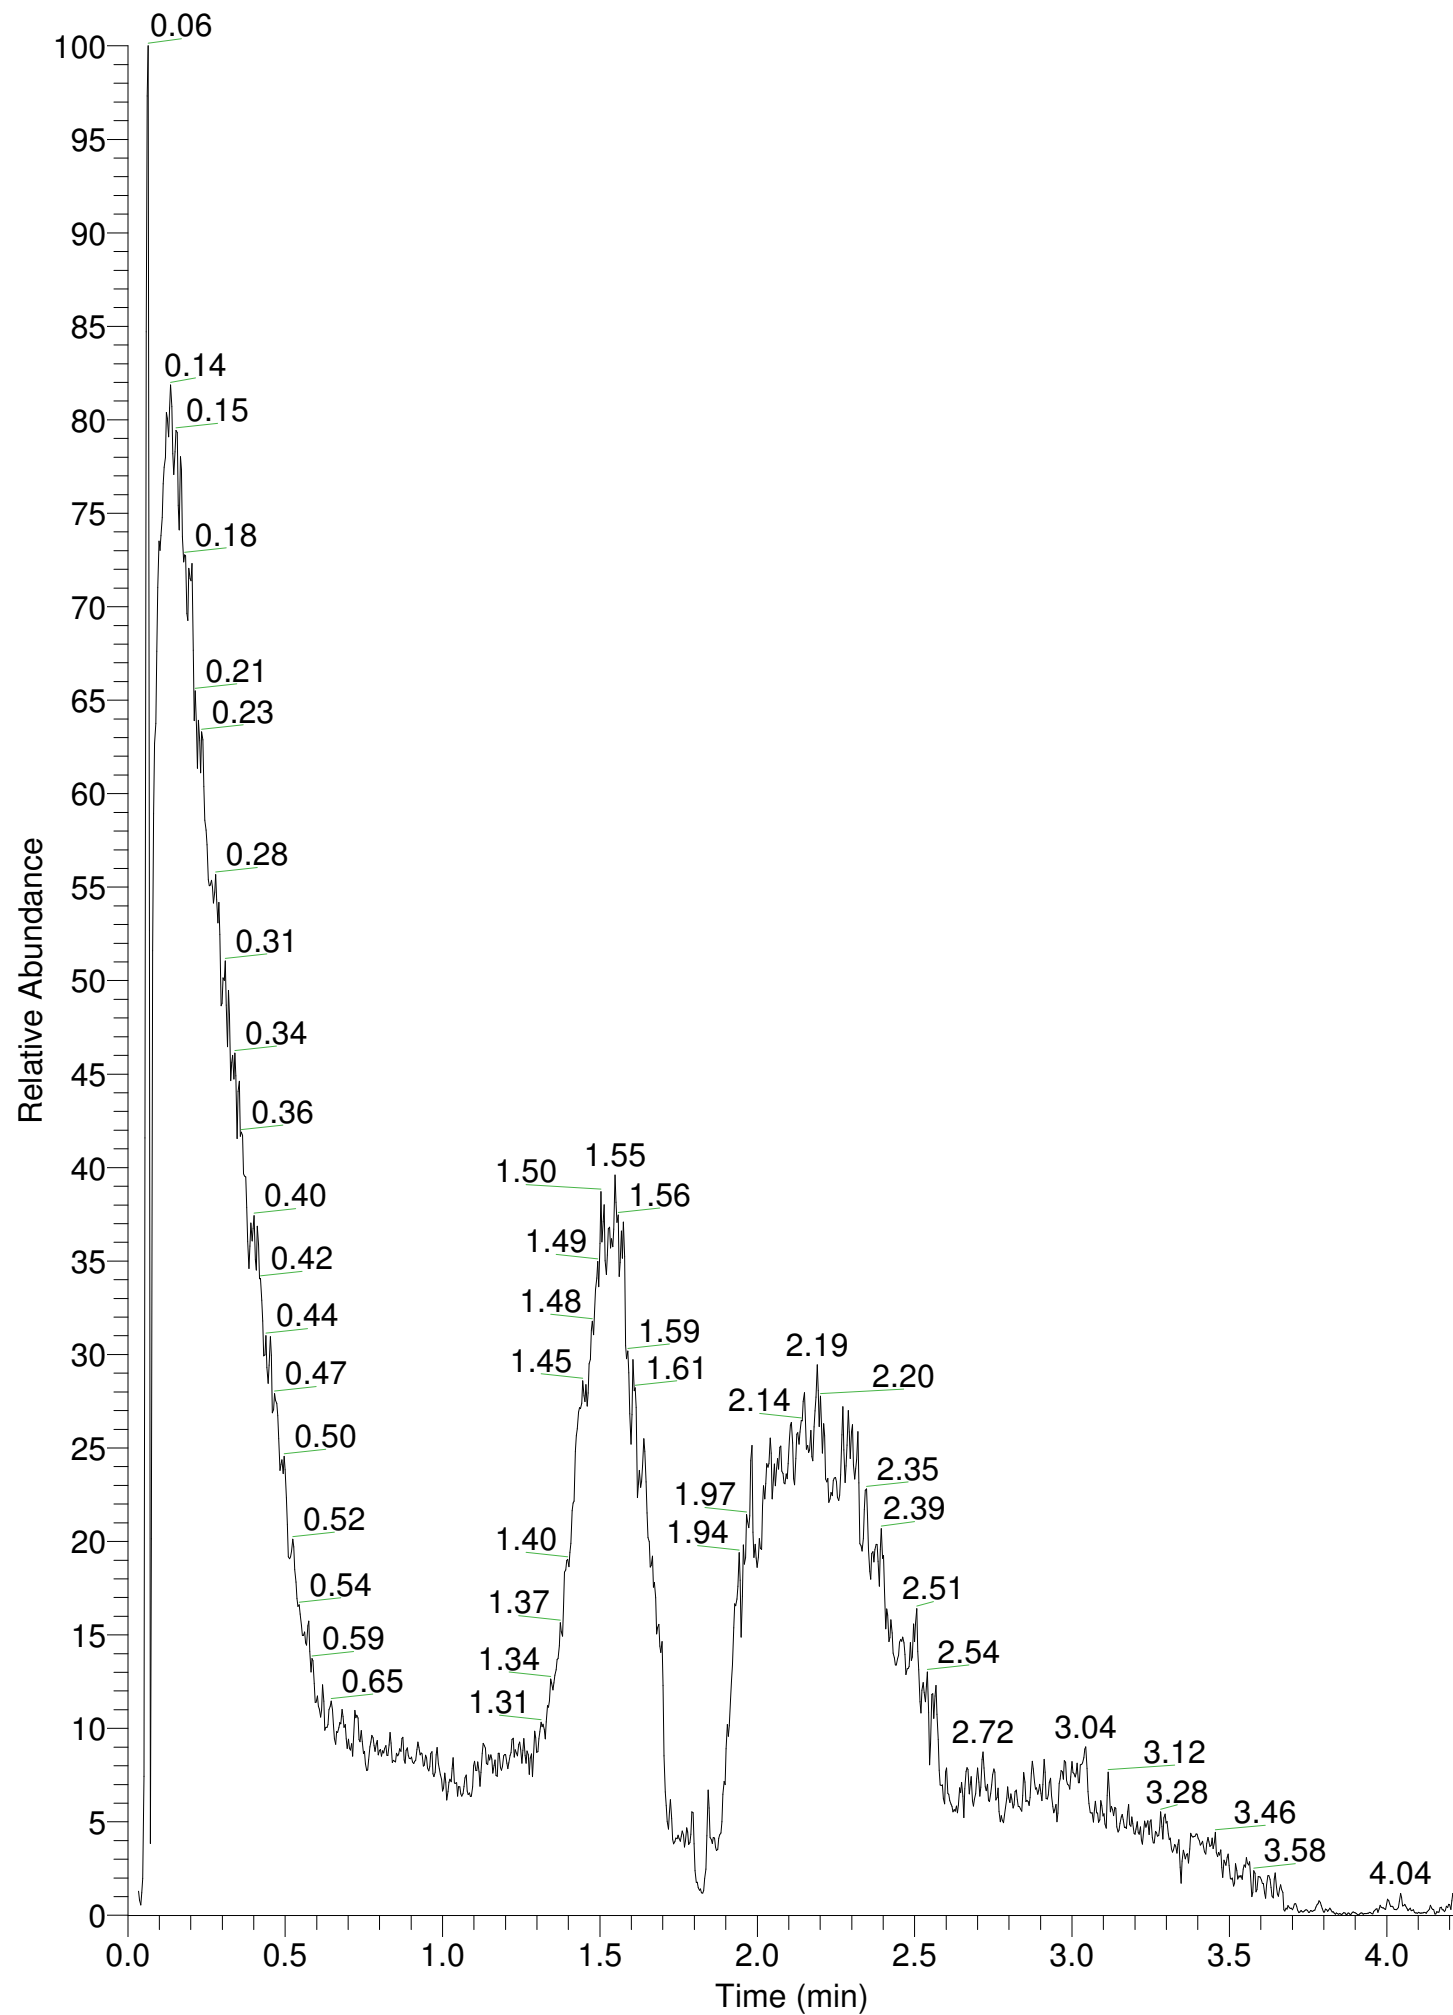

Selwan-42A #698 RT: 2.40 AV: 1 NL: 3.90E4

T: {0,0} + c EI Full ms [50.00-1000.00]

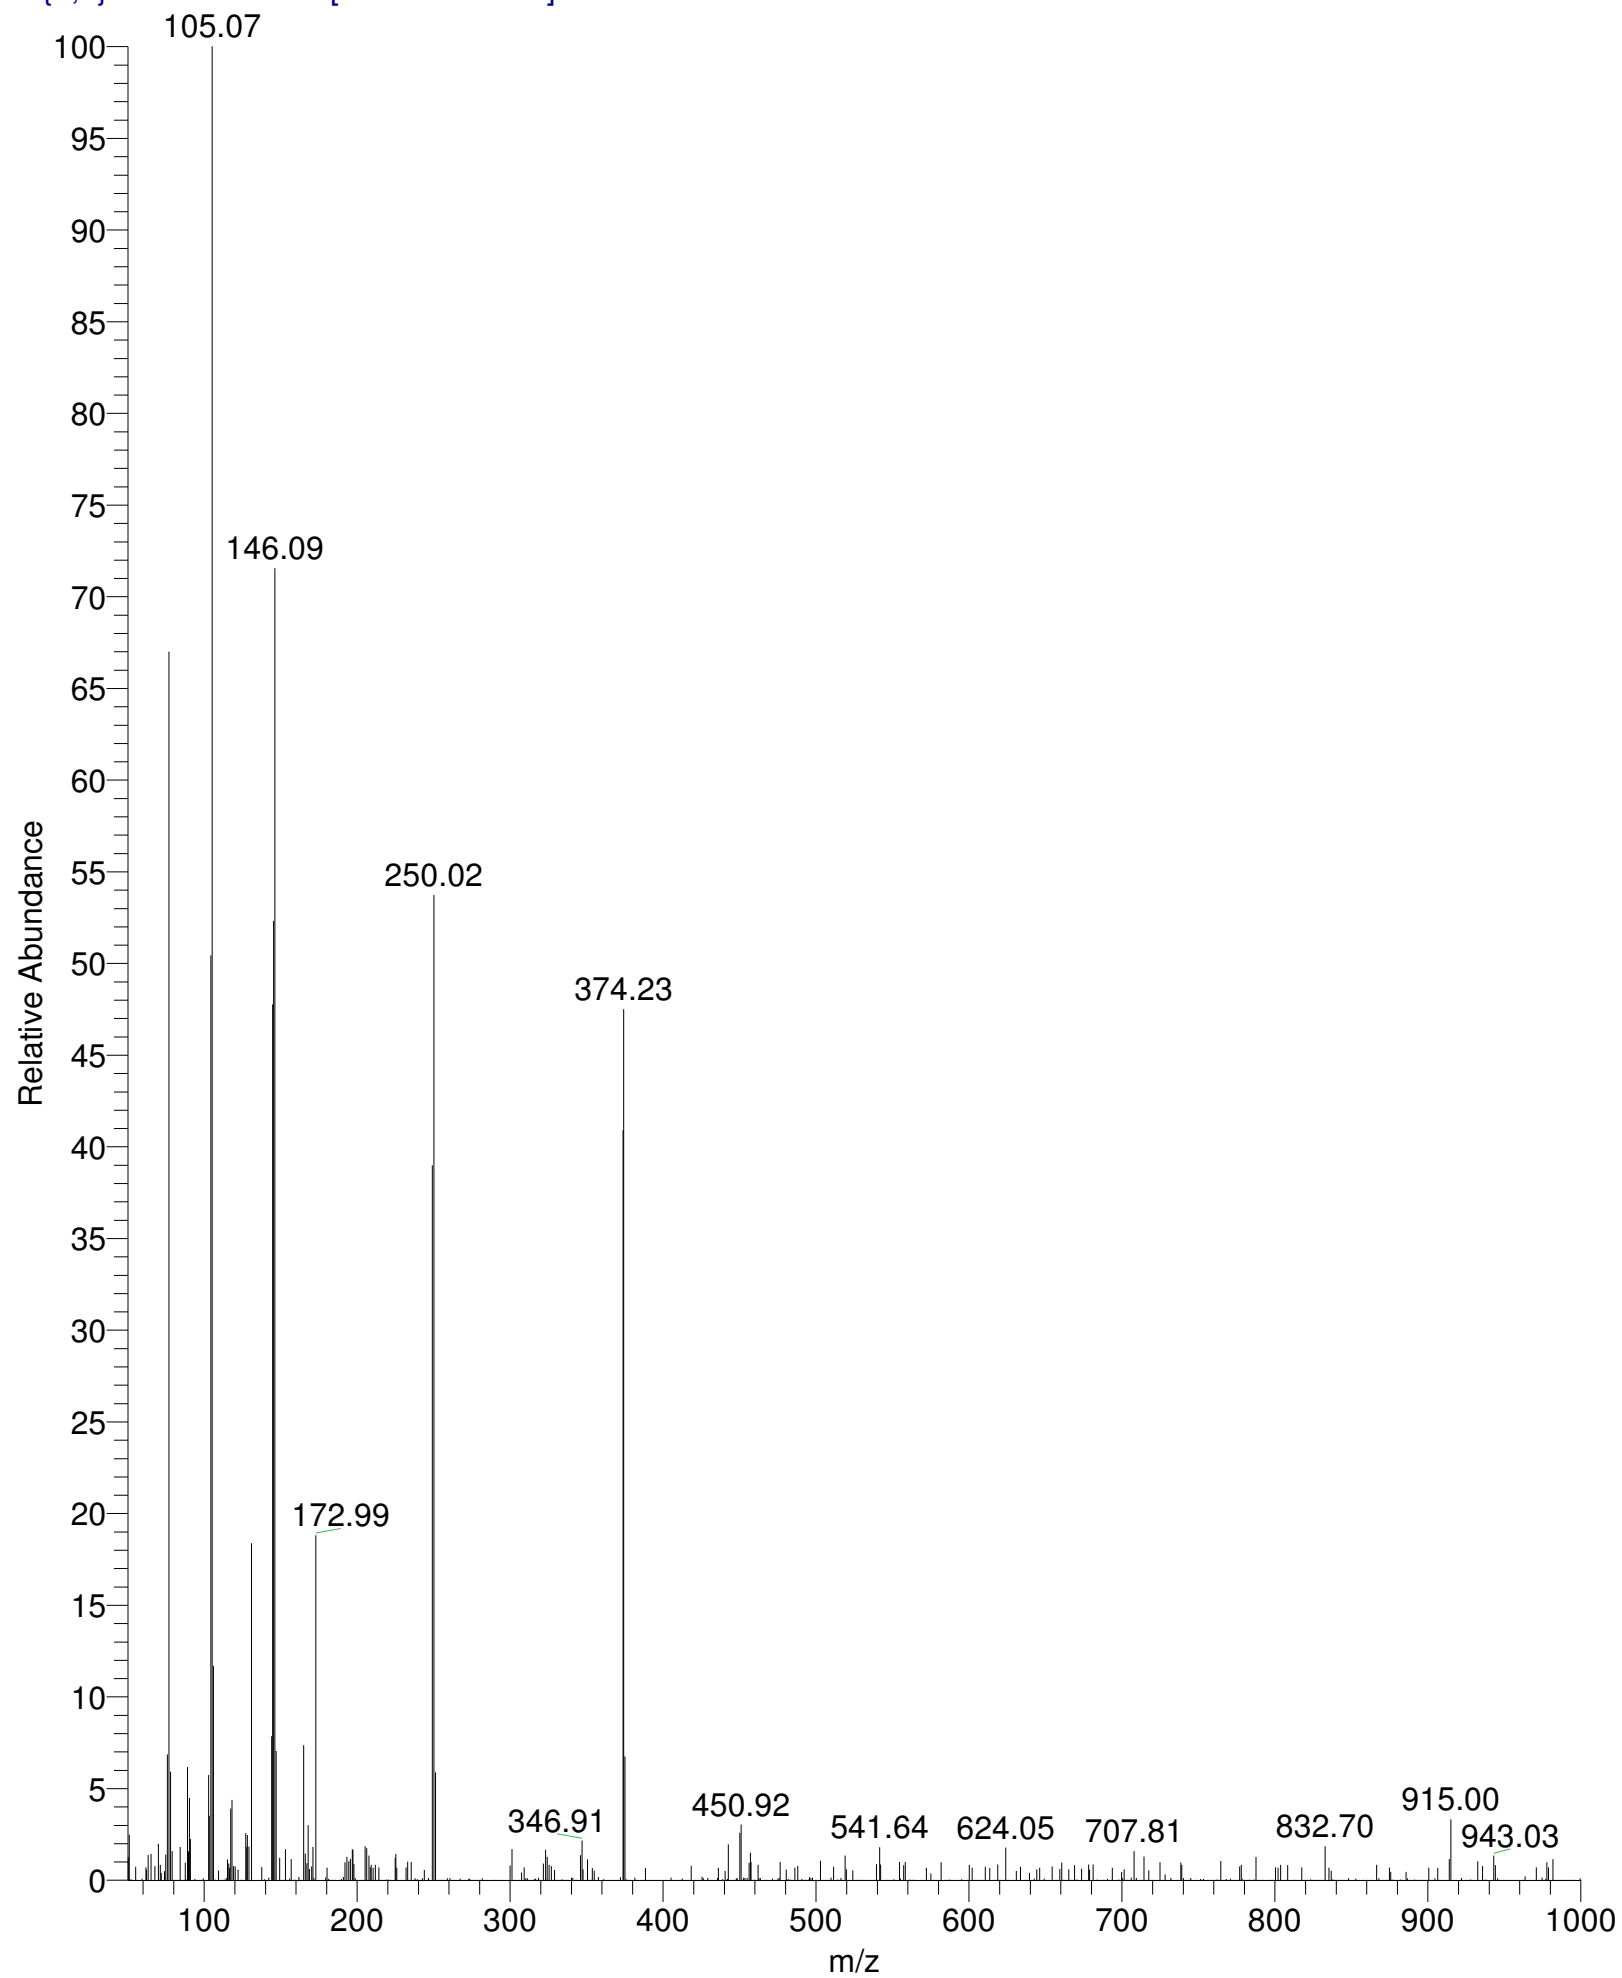

Selwan-42A#698 RT: 2.40

T: {0,0} + c EI Full ms [50.00-1000.00]

m/z= 50.00-1000.04

| m/z    | Intensity | Relative |
|--------|-----------|----------|
| 50.24  | 488.9     | 1.25     |
| 50.99  | 963.2     | 2.47     |
| 52.05  | 17.9      | 0.05     |
| 52.56  | 0.0       | 0.00     |
| 53.31  | 0.1       | 0.00     |
| 54.12  | 0.0       | 0.00     |
| 55.11  | 279.8     | 0.72     |
| 56.05  | 0.0       | 0.00     |
| 56.85  | 0.2       | 0.00     |
| 58.23  | 0.1       | 0.00     |
| 59.30  | 29.3      | 0.08     |
| 61.19  | 0.5       | 0.00     |
| 61.78  | 271.9     | 0.70     |
| 62.33  | 222.9     | 0.57     |
| 63.39  | 533.1     | 1.37     |
| 65.20  | 554.1     | 1.42     |
| 66.34  | 0.2       | 0.00     |
| 67.72  | 295.0     | 0.76     |
| 69.97  | 773.5     | 1.98     |
| 70.67  | 0.0       | 0.00     |
| 71.28  | 322.5     | 0.83     |
| 71.96  | 150.7     | 0.39     |
| 73.09  | 0.2       | 0.00     |
| 74.04  | 189.0     | 0.48     |
| 74.84  | 541.1     | 1.39     |
| 75.93  | 2673.5    | 6.85     |
| 76.94  | 26132.7   | 66.99    |
| 77.91  | 2306.7    | 5.91     |
| 78.89  | 615.2     | 1.58     |
| 79.52  | 0.0       | 0.00     |
| 80.20  | 0.0       | 0.00     |
| 81.37  | 0.1       | 0.00     |
| 82.41  | 0.0       | 0.00     |
| 83.32  | 0.2       | 0.00     |
| 84.19  | 702.9     | 1.80     |
| 84.79  | 0.1       | 0.00     |
| 85.75  | 0.0       | 0.00     |
| 86.41  | 0.0       | 0.00     |
| 87.02  | 0.0       | 0.00     |
| 87.54  | 370.7     | 0.95     |
| 88.12  | 9.5       | 0.02     |
| 88.97  | 2404.0    | 6.16     |
| 89.58  | 609.8     | 1.56     |
| 90.21  | 1748.6    | 4.48     |
| 90.94  | 878.0     | 2.25     |
| 92.24  | 0.0       | 0.00     |
| 93.15  | 0.3       | 0.00     |
| 93.92  | 24.8      | 0.06     |
| 94.56  | 0.0       | 0.00     |
| 95.45  | 0.2       | 0.00     |
| 96.71  | 0.2       | 0.00     |
| 97.53  | 0.0       | 0.00     |
| 98.17  | 0.0       | 0.00     |
| 99.28  | 36.3      | 0.09     |
| 100.15 | 0.0       | 0.00     |

Selwan-42A#698 RT: 2.40

T: {0,0} + c EI Full ms [50.00-1000.00]

m/z= 50.00-1000.04

| m/z    | Intensity | Relative |
|--------|-----------|----------|
| 100.65 | 0.1       | 0.00     |
| 102.00 | 6.4       | 0.02     |
| 102.80 | 2234.8    | 5.73     |
| 103.34 | 1368.2    | 3.51     |
| 104.28 | 19672.4   | 50.43    |
| 105.07 | 39009.2   | 100.00   |
| 105.95 | 4560.5    | 11.69    |
| 106.91 | 7.2       | 0.02     |
| 107.71 | 0.1       | 0.00     |
| 109.25 | 202.7     | 0.52     |
| 110.46 | 1.5       | 0.00     |
| 111.22 | 0.1       | 0.00     |
| 111.96 | 0.2       | 0.00     |
| 112.75 | 0.0       | 0.00     |
| 113.47 | 11.1      | 0.03     |
| 114.30 | 46.5      | 0.12     |
| 115.09 | 438.5     | 1.12     |
| 115.97 | 349.5     | 0.90     |
| 116.51 | 264.8     | 0.68     |
| 117.36 | 1521.6    | 3.90     |
| 118.10 | 1705.7    | 4.37     |
| 119.17 | 293.4     | 0.75     |
| 120.15 | 287.1     | 0.74     |
| 121.24 | 2.7       | 0.01     |
| 122.06 | 219.5     | 0.56     |
| 123.38 | 0.0       | 0.00     |
| 123.91 | 0.0       | 0.00     |
| 124.57 | 0.0       | 0.00     |
| 125.26 | 0.0       | 0.00     |
| 125.86 | 0.0       | 0.00     |
| 127.09 | 995.1     | 2.55     |
| 127.64 | 701.5     | 1.80     |
| 128.18 | 959.6     | 2.46     |
| 129.28 | 713.0     | 1.83     |
| 130.87 | 7166.9    | 18.37    |
| 132.48 | 0.4       | 0.00     |
| 133.96 | 1.5       | 0.00     |
| 135.42 | 0.1       | 0.00     |
| 136.16 | 0.0       | 0.00     |
| 137.61 | 277.1     | 0.71     |
| 138.37 | 0.0       | 0.00     |
| 138.94 | 0.3       | 0.00     |
| 139.44 | 15.9      | 0.04     |
| 140.99 | 0.3       | 0.00     |
| 142.23 | 48.6      | 0.12     |
| 143.99 | 3060.1    | 7.84     |
| 144.72 | 18631.6   | 47.76    |
| 145.25 | 20408.8   | 52.32    |
| 146.09 | 27909.6   | 71.55    |
| 146.95 | 2744.4    | 7.04     |
| 148.55 | 1.1       | 0.00     |
| 149.29 | 470.6     | 1.21     |
| 150.50 | 0.0       | 0.00     |
| 151.08 | 0.0       | 0.00     |
| 151.94 | 0.4       | 0.00     |

Selwan-42A#698 RT: 2.40

T: {0,0} + c EI Full ms [50.00-1000.00]

m/z= 50.00-1000.04

| m/z    | Intensity | Relative |
|--------|-----------|----------|
| 153.04 | 654.8     | 1.68     |
| 153.83 | 0.0       | 0.00     |
| 154.56 | 0.0       | 0.00     |
| 155.67 | 30.0      | 0.08     |
| 156.70 | 448.4     | 1.15     |
| 158.32 | 0.0       | 0.00     |
| 159.39 | 13.4      | 0.03     |
| 160.51 | 0.0       | 0.00     |
| 161.80 | 66.8      | 0.17     |
| 162.59 | 0.0       | 0.00     |
| 163.32 | 0.0       | 0.00     |
| 163.88 | 0.0       | 0.00     |
| 164.98 | 2867.6    | 7.35     |
| 166.10 | 559.6     | 1.43     |
| 167.07 | 355.5     | 0.91     |
| 167.89 | 1169.8    | 3.00     |
| 168.73 | 233.4     | 0.60     |
| 169.40 | 0.3       | 0.00     |
| 170.11 | 291.6     | 0.75     |
| 171.08 | 703.2     | 1.80     |
| 171.70 | 42.7      | 0.11     |
| 172.99 | 7335.9    | 18.81    |
| 174.22 | 1.7       | 0.00     |
| 175.29 | 0.0       | 0.00     |
| 176.51 | 0.3       | 0.00     |
| 178.13 | 0.6       | 0.00     |
| 178.96 | 0.3       | 0.00     |
| 179.50 | 59.3      | 0.15     |
| 180.19 | 263.6     | 0.68     |
| 181.31 | 22.2      | 0.06     |
| 182.12 | 0.0       | 0.00     |
| 182.71 | 0.0       | 0.00     |
| 183.72 | 0.0       | 0.00     |
| 184.39 | 0.0       | 0.00     |
| 185.60 | 0.0       | 0.00     |
| 186.19 | 0.0       | 0.00     |
| 187.53 | 6.1       | 0.02     |
| 188.48 | 0.0       | 0.00     |
| 189.55 | 25.6      | 0.07     |
| 190.86 | 65.7      | 0.17     |
| 191.96 | 380.2     | 0.97     |
| 192.72 | 0.0       | 0.00     |
| 193.26 | 495.9     | 1.27     |
| 194.50 | 400.0     | 1.03     |
| 195.57 | 452.5     | 1.16     |
| 196.69 | 656.3     | 1.68     |
| 197.24 | 639.5     | 1.64     |
| 197.79 | 344.0     | 0.88     |
| 198.68 | 41.8      | 0.11     |
| 199.45 | 0.0       | 0.00     |
| 200.13 | 0.0       | 0.00     |
| 201.77 | 0.0       | 0.00     |
| 202.77 | 0.1       | 0.00     |
| 203.28 | 0.0       | 0.00     |
| 203.98 | 0.0       | 0.00     |

Selwan-42A#698 RT: 2.40

T: {0,0} + c EI Full ms [50.00-1000.00]

m/z= 50.00-1000.04

| m/z    | Intensity | Relative |
|--------|-----------|----------|
| 204.56 | 0.0       | 0.00     |
| 205.21 | 719.4     | 1.84     |
| 206.09 | 676.9     | 1.74     |
| 206.87 | 0.3       | 0.00     |
| 207.62 | 519.7     | 1.33     |
| 208.48 | 270.0     | 0.69     |
| 209.09 | 325.0     | 0.83     |
| 210.30 | 259.2     | 0.66     |
| 211.08 | 0.0       | 0.00     |
| 211.92 | 320.4     | 0.82     |
| 212.47 | 0.0       | 0.00     |
| 213.42 | 1.4       | 0.00     |
| 214.15 | 265.9     | 0.68     |
| 214.75 | 0.2       | 0.00     |
| 215.55 | 0.0       | 0.00     |
| 216.09 | 0.0       | 0.00     |
| 216.75 | 0.0       | 0.00     |
| 217.63 | 0.0       | 0.00     |
| 218.30 | 0.0       | 0.00     |
| 219.20 | 13.0      | 0.03     |
| 220.30 | 13.2      | 0.03     |
| 220.94 | 0.0       | 0.00     |
| 221.70 | 0.2       | 0.00     |
| 222.57 | 0.1       | 0.00     |
| 224.23 | 0.0       | 0.00     |
| 224.76 | 475.2     | 1.22     |
| 225.28 | 556.5     | 1.43     |
| 225.91 | 261.8     | 0.67     |
| 227.25 | 0.0       | 0.00     |
| 227.95 | 0.0       | 0.00     |
| 228.52 | 0.2       | 0.00     |
| 229.99 | 0.0       | 0.00     |
| 230.74 | 0.0       | 0.00     |
| 232.01 | 267.0     | 0.68     |
| 233.00 | 394.6     | 1.01     |
| 233.61 | 0.2       | 0.00     |
| 234.69 | 0.9       | 0.00     |
| 235.24 | 385.7     | 0.99     |
| 236.63 | 0.0       | 0.00     |
| 237.15 | 1.6       | 0.00     |
| 237.86 | 40.0      | 0.10     |
| 238.50 | 0.0       | 0.00     |
| 239.24 | 17.8      | 0.05     |
| 240.15 | 0.0       | 0.00     |
| 241.31 | 0.4       | 0.00     |
| 242.50 | 36.0      | 0.09     |
| 243.40 | 0.3       | 0.00     |
| 243.92 | 211.1     | 0.54     |
| 244.85 | 0.0       | 0.00     |
| 245.91 | 0.0       | 0.00     |
| 246.64 | 41.9      | 0.11     |
| 247.25 | 0.0       | 0.00     |
| 248.96 | 15206.2   | 38.98    |
| 250.02 | 20955.6   | 53.72    |
| 251.18 | 2291.4    | 5.87     |

Selwan-42A#698 RT: 2.40

T: {0,0} + c EI Full ms [50.00-1000.00]

m/z= 50.00-1000.04

| m/z    | Intensity | Relative |
|--------|-----------|----------|
| 252.07 | 0.3       | 0.00     |
| 252.87 | 0.0       | 0.00     |
| 253.44 | 0.0       | 0.00     |
| 254.17 | 0.0       | 0.00     |
| 254.86 | 0.0       | 0.00     |
| 255.48 | 0.0       | 0.00     |
| 256.04 | 0.0       | 0.00     |
| 256.74 | 0.0       | 0.00     |
| 257.80 | 0.0       | 0.00     |
| 258.98 | 35.7      | 0.09     |
| 259.50 | 0.0       | 0.00     |
| 260.59 | 42.2      | 0.11     |
| 261.63 | 0.0       | 0.00     |
| 262.46 | 0.0       | 0.00     |
| 263.25 | 0.0       | 0.00     |
| 263.82 | 0.0       | 0.00     |
| 264.71 | 0.0       | 0.00     |
| 265.57 | 0.2       | 0.00     |
| 266.52 | 0.2       | 0.00     |
| 267.29 | 29.3      | 0.08     |
| 268.36 | 0.0       | 0.00     |
| 269.12 | 0.3       | 0.00     |
| 270.34 | 0.0       | 0.00     |
| 270.86 | 0.1       | 0.00     |
| 271.98 | 0.0       | 0.00     |
| 272.89 | 25.2      | 0.06     |
| 273.60 | 29.2      | 0.07     |
| 274.18 | 0.0       | 0.00     |
| 274.84 | 0.2       | 0.00     |
| 275.39 | 0.0       | 0.00     |
| 276.40 | 0.0       | 0.00     |
| 277.49 | 0.0       | 0.00     |
| 278.12 | 0.0       | 0.00     |
| 278.79 | 1.7       | 0.00     |
| 279.82 | 0.1       | 0.00     |
| 280.41 | 0.0       | 0.00     |
| 281.65 | 35.8      | 0.09     |
| 283.05 | 1.0       | 0.00     |
| 283.73 | 0.0       | 0.00     |
| 284.98 | 0.0       | 0.00     |
| 285.48 | 0.0       | 0.00     |
| 286.71 | 0.0       | 0.00     |
| 287.27 | 0.0       | 0.00     |
| 288.99 | 0.0       | 0.00     |
| 289.65 | 0.0       | 0.00     |
| 290.27 | 0.0       | 0.00     |
| 290.93 | 0.0       | 0.00     |
| 292.16 | 0.2       | 0.00     |
| 293.14 | 0.0       | 0.00     |
| 293.89 | 0.0       | 0.00     |
| 294.60 | 1.4       | 0.00     |
| 295.80 | 0.2       | 0.00     |
| 296.69 | 0.0       | 0.00     |
| 297.89 | 0.0       | 0.00     |
| 298.43 | 0.0       | 0.00     |

Selwan-42A#698 RT: 2.40

T: {0,0} + c EI Full ms [50.00-1000.00]

m/z= 50.00-1000.04

| m/z    | Intensity | Relative |
|--------|-----------|----------|
| 299.86 | 307.6     | 0.79     |
| 301.17 | 658.6     | 1.69     |
| 302.26 | 0.0       | 0.00     |
| 302.96 | 4.2       | 0.01     |
| 303.56 | 0.1       | 0.00     |
| 304.97 | 0.0       | 0.00     |
| 305.67 | 0.0       | 0.00     |
| 306.32 | 0.0       | 0.00     |
| 307.40 | 157.3     | 0.40     |
| 308.51 | 0.0       | 0.00     |
| 309.01 | 270.5     | 0.69     |
| 310.06 | 35.7      | 0.09     |
| 310.57 | 0.1       | 0.00     |
| 311.20 | 36.4      | 0.09     |
| 311.83 | 0.0       | 0.00     |
| 312.65 | 0.6       | 0.00     |
| 313.46 | 0.0       | 0.00     |
| 314.54 | 0.0       | 0.00     |
| 315.06 | 0.0       | 0.00     |
| 315.89 | 17.1      | 0.04     |
| 316.68 | 33.9      | 0.09     |
| 317.62 | 0.3       | 0.00     |
| 318.50 | 42.4      | 0.11     |
| 319.01 | 0.0       | 0.00     |
| 319.69 | 0.0       | 0.00     |
| 320.41 | 0.0       | 0.00     |
| 321.72 | 352.9     | 0.90     |
| 323.11 | 642.5     | 1.65     |
| 323.63 | 9.1       | 0.02     |
| 324.26 | 495.4     | 1.27     |
| 325.34 | 320.4     | 0.82     |
| 325.97 | 0.0       | 0.00     |
| 326.93 | 293.8     | 0.75     |
| 327.58 | 0.2       | 0.00     |
| 328.33 | 0.1       | 0.00     |
| 328.98 | 212.6     | 0.54     |
| 329.84 | 0.0       | 0.00     |
| 330.38 | 0.0       | 0.00     |
| 330.92 | 0.0       | 0.00     |
| 331.59 | 0.0       | 0.00     |
| 332.58 | 0.0       | 0.00     |
| 333.37 | 10.8      | 0.03     |
| 334.32 | 10.6      | 0.03     |
| 335.03 | 0.0       | 0.00     |
| 335.71 | 0.0       | 0.00     |
| 336.60 | 0.0       | 0.00     |
| 337.41 | 0.0       | 0.00     |
| 338.07 | 0.3       | 0.00     |
| 339.02 | 0.0       | 0.00     |
| 340.06 | 49.2      | 0.13     |
| 340.93 | 41.9      | 0.11     |
| 341.95 | 0.0       | 0.00     |
| 342.53 | 0.0       | 0.00     |
| 343.13 | 0.0       | 0.00     |
| 343.65 | 0.0       | 0.00     |



Selwan-42A#698 RT: 2.40

T: {0,0} + c EI Full ms [50.00-1000.00]

m/z= 50.00-1000.04

| m/z    | Intensity | Relative |
|--------|-----------|----------|
| 344.30 | 0.6       | 0.00     |
| 345.94 | 530.4     | 1.36     |
| 346.91 | 840.4     | 2.15     |
| 347.70 | 226.1     | 0.58     |
| 349.05 | 0.1       | 0.00     |
| 349.91 | 0.0       | 0.00     |
| 350.52 | 436.0     | 1.12     |
| 351.04 | 0.0       | 0.00     |
| 351.86 | 0.0       | 0.00     |
| 352.38 | 0.0       | 0.00     |
| 353.08 | 0.0       | 0.00     |
| 353.71 | 252.2     | 0.65     |
| 354.27 | 0.0       | 0.00     |
| 354.87 | 202.4     | 0.52     |
| 355.68 | 0.4       | 0.00     |
| 356.87 | 0.0       | 0.00     |
| 357.61 | 67.5      | 0.17     |
| 359.88 | 0.0       | 0.00     |
| 360.55 | 0.0       | 0.00     |
| 361.23 | 17.8      | 0.05     |
| 361.86 | 0.0       | 0.00     |
| 363.62 | 0.0       | 0.00     |
| 364.90 | 0.0       | 0.00     |
| 365.69 | 0.1       | 0.00     |
| 366.23 | 0.0       | 0.00     |
| 366.84 | 0.0       | 0.00     |
| 368.20 | 0.0       | 0.00     |
| 368.71 | 0.0       | 0.00     |
| 369.85 | 0.0       | 0.00     |
| 370.58 | 0.0       | 0.00     |
| 371.10 | 0.0       | 0.00     |
| 371.99 | 57.6      | 0.15     |
| 373.65 | 15951.1   | 40.89    |
| 374.23 | 18525.2   | 47.49    |
| 375.11 | 2633.9    | 6.75     |
| 375.92 | 18.7      | 0.05     |
| 376.73 | 0.6       | 0.00     |
| 377.75 | 0.1       | 0.00     |
| 378.55 | 0.7       | 0.00     |
| 379.59 | 1.4       | 0.00     |
| 380.54 | 0.1       | 0.00     |
| 381.58 | 50.0      | 0.13     |
| 382.86 | 0.3       | 0.00     |
| 383.76 | 0.0       | 0.00     |
| 385.49 | 1.4       | 0.00     |
| 386.35 | 0.0       | 0.00     |
| 387.19 | 0.0       | 0.00     |
| 388.50 | 257.4     | 0.66     |
| 389.03 | 0.0       | 0.00     |
| 389.61 | 0.0       | 0.00     |
| 390.55 | 0.0       | 0.00     |
| 391.15 | 0.0       | 0.00     |
| 391.72 | 0.0       | 0.00     |
| 393.07 | 0.0       | 0.00     |
| 393.85 | 0.0       | 0.00     |

Selwan-42A#698 RT: 2.40

T: {0,0} + c EI Full ms [50.00-1000.00]

m/z= 50.00-1000.04

| m/z    | Intensity | Relative |
|--------|-----------|----------|
| 394.95 | 0.0       | 0.00     |
| 395.67 | 0.0       | 0.00     |
| 396.95 | 0.0       | 0.00     |
| 398.06 | 0.0       | 0.00     |
| 398.67 | 1.7       | 0.00     |
| 399.89 | 0.0       | 0.00     |
| 400.43 | 0.0       | 0.00     |
| 401.35 | 0.1       | 0.00     |
| 402.04 | 0.0       | 0.00     |
| 402.62 | 0.0       | 0.00     |
| 403.61 | 0.0       | 0.00     |
| 405.06 | 48.6      | 0.12     |
| 405.82 | 0.0       | 0.00     |
| 406.44 | 0.0       | 0.00     |
| 407.37 | 0.2       | 0.00     |
| 408.44 | 0.3       | 0.00     |
| 409.06 | 0.0       | 0.00     |
| 410.25 | 0.4       | 0.00     |
| 411.15 | 0.0       | 0.00     |
| 411.76 | 0.0       | 0.00     |
| 412.41 | 29.7      | 0.08     |
| 413.39 | 0.0       | 0.00     |
| 414.55 | 0.0       | 0.00     |
| 415.87 | 0.0       | 0.00     |
| 416.72 | 0.0       | 0.00     |
| 417.36 | 0.0       | 0.00     |
| 418.37 | 301.5     | 0.77     |
| 419.66 | 0.0       | 0.00     |
| 421.00 | 0.0       | 0.00     |
| 422.02 | 0.0       | 0.00     |
| 423.48 | 0.0       | 0.00     |
| 424.33 | 0.0       | 0.00     |
| 425.53 | 70.6      | 0.18     |
| 426.19 | 35.7      | 0.09     |
| 427.08 | 0.1       | 0.00     |
| 429.15 | 42.5      | 0.11     |
| 430.05 | 0.0       | 0.00     |
| 430.77 | 0.0       | 0.00     |
| 431.43 | 0.0       | 0.00     |
| 432.38 | 0.0       | 0.00     |
| 433.78 | 0.0       | 0.00     |
| 435.41 | 42.4      | 0.11     |
| 436.00 | 263.8     | 0.68     |
| 437.00 | 0.5       | 0.00     |
| 438.26 | 0.0       | 0.00     |
| 438.77 | 16.5      | 0.04     |
| 439.72 | 0.0       | 0.00     |
| 440.44 | 197.0     | 0.51     |
| 441.33 | 0.3       | 0.00     |
| 441.94 | 22.8      | 0.06     |
| 442.64 | 762.0     | 1.95     |
| 443.95 | 0.0       | 0.00     |
| 444.55 | 0.0       | 0.00     |
| 445.49 | 0.1       | 0.00     |
| 446.36 | 0.0       | 0.00     |

Selwan-42A#698 RT: 2.40

T: {0,0} + c EI Full ms [50.00-1000.00]

m/z= 50.00-1000.04

| m/z    | Intensity | Relative |
|--------|-----------|----------|
| 447.03 | 0.0       | 0.00     |
| 447.75 | 40.5      | 0.10     |
| 448.44 | 35.8      | 0.09     |
| 450.06 | 1007.0    | 2.58     |
| 450.92 | 1179.7    | 3.02     |
| 451.76 | 11.8      | 0.03     |
| 452.69 | 48.7      | 0.12     |
| 453.51 | 42.2      | 0.11     |
| 454.24 | 0.0       | 0.00     |
| 454.86 | 42.1      | 0.11     |
| 456.15 | 363.7     | 0.93     |
| 456.93 | 583.4     | 1.50     |
| 457.43 | 382.2     | 0.98     |
| 458.15 | 0.0       | 0.00     |
| 459.39 | 11.3      | 0.03     |
| 460.62 | 0.0       | 0.00     |
| 461.39 | 0.0       | 0.00     |
| 462.10 | 322.3     | 0.83     |
| 462.77 | 35.2      | 0.09     |
| 463.59 | 41.4      | 0.11     |
| 464.53 | 0.0       | 0.00     |
| 465.96 | 0.0       | 0.00     |
| 466.62 | 0.0       | 0.00     |
| 467.32 | 0.0       | 0.00     |
| 467.91 | 0.1       | 0.00     |
| 469.15 | 6.1       | 0.02     |
| 470.02 | 0.0       | 0.00     |
| 471.54 | 28.5      | 0.07     |
| 472.64 | 0.4       | 0.00     |
| 473.45 | 0.3       | 0.00     |
| 474.32 | 1.2       | 0.00     |
| 475.05 | 27.5      | 0.07     |
| 475.76 | 41.3      | 0.11     |
| 476.44 | 387.3     | 0.99     |
| 478.02 | 0.0       | 0.00     |
| 479.13 | 0.0       | 0.00     |
| 480.38 | 222.7     | 0.57     |
| 481.16 | 0.3       | 0.00     |
| 481.77 | 27.0      | 0.07     |
| 482.67 | 0.0       | 0.00     |
| 483.43 | 13.2      | 0.03     |
| 484.50 | 0.1       | 0.00     |
| 485.09 | 0.0       | 0.00     |
| 486.01 | 261.7     | 0.67     |
| 486.76 | 0.0       | 0.00     |
| 487.96 | 304.8     | 0.78     |
| 488.84 | 0.0       | 0.00     |
| 489.35 | 0.0       | 0.00     |
| 490.71 | 23.3      | 0.06     |
| 491.63 | 0.0       | 0.00     |
| 492.45 | 0.2       | 0.00     |
| 493.11 | 0.2       | 0.00     |
| 493.62 | 0.0       | 0.00     |
| 494.12 | 0.0       | 0.00     |
| 495.05 | 11.2      | 0.03     |

Selwan-42A#698 RT: 2.40

T: {0,0} + c EI Full ms [50.00-1000.00]

m/z= 50.00-1000.04

| m/z    | Intensity | Relative |
|--------|-----------|----------|
| 495.76 | 62.4      | 0.16     |
| 496.49 | 36.4      | 0.09     |
| 497.69 | 47.9      | 0.12     |
| 499.05 | 0.0       | 0.00     |
| 499.61 | 1.5       | 0.00     |
| 500.35 | 0.3       | 0.00     |
| 501.07 | 0.0       | 0.00     |
| 502.34 | 0.1       | 0.00     |
| 502.92 | 414.2     | 1.06     |
| 504.32 | 0.0       | 0.00     |
| 504.99 | 0.0       | 0.00     |
| 505.90 | 1.2       | 0.00     |
| 506.52 | 0.0       | 0.00     |
| 507.15 | 0.0       | 0.00     |
| 507.94 | 0.2       | 0.00     |
| 508.97 | 0.0       | 0.00     |
| 509.73 | 48.0      | 0.12     |
| 510.43 | 0.0       | 0.00     |
| 511.52 | 280.7     | 0.72     |
| 512.80 | 0.0       | 0.00     |
| 513.93 | 13.4      | 0.03     |
| 514.49 | 0.0       | 0.00     |
| 515.50 | 0.0       | 0.00     |
| 516.17 | 41.6      | 0.11     |
| 517.15 | 0.3       | 0.00     |
| 517.95 | 0.0       | 0.00     |
| 518.88 | 521.1     | 1.34     |
| 519.75 | 231.4     | 0.59     |
| 520.28 | 0.0       | 0.00     |
| 521.59 | 0.2       | 0.00     |
| 522.19 | 0.1       | 0.00     |
| 523.88 | 207.4     | 0.53     |
| 524.67 | 0.0       | 0.00     |
| 525.20 | 0.3       | 0.00     |
| 526.00 | 0.0       | 0.00     |
| 526.81 | 0.0       | 0.00     |
| 527.41 | 0.0       | 0.00     |
| 527.94 | 0.2       | 0.00     |
| 528.96 | 0.0       | 0.00     |
| 529.55 | 0.2       | 0.00     |
| 531.00 | 0.0       | 0.00     |
| 531.52 | 0.0       | 0.00     |
| 532.63 | 0.0       | 0.00     |
| 533.56 | 0.0       | 0.00     |
| 534.24 | 0.1       | 0.00     |
| 535.73 | 0.0       | 0.00     |
| 536.36 | 0.0       | 0.00     |
| 537.57 | 0.0       | 0.00     |
| 538.20 | 0.0       | 0.00     |
| 538.71 | 0.0       | 0.00     |
| 539.42 | 334.1     | 0.86     |
| 539.98 | 0.2       | 0.00     |
| 540.65 | 0.0       | 0.00     |
| 541.64 | 695.2     | 1.78     |
| 542.17 | 329.9     | 0.85     |

Selwan-42A#698 RT: 2.40

T: {0,0} + c EI Full ms [50.00-1000.00]

m/z= 50.00-1000.04

| m/z    | Intensity | Relative |
|--------|-----------|----------|
| 543.58 | 0.0       | 0.00     |
| 545.12 | 0.0       | 0.00     |
| 545.76 | 0.0       | 0.00     |
| 546.27 | 0.1       | 0.00     |
| 547.27 | 0.0       | 0.00     |
| 548.50 | 0.0       | 0.00     |
| 549.36 | 0.0       | 0.00     |
| 550.22 | 0.1       | 0.00     |
| 551.01 | 15.6      | 0.04     |
| 552.24 | 0.0       | 0.00     |
| 553.38 | 0.0       | 0.00     |
| 554.49 | 382.2     | 0.98     |
| 555.19 | 29.3      | 0.08     |
| 556.67 | 0.0       | 0.00     |
| 557.28 | 317.9     | 0.81     |
| 558.26 | 381.3     | 0.98     |
| 559.18 | 0.0       | 0.00     |
| 560.66 | 0.0       | 0.00     |
| 561.27 | 8.9       | 0.02     |
| 561.91 | 0.0       | 0.00     |
| 562.84 | 0.0       | 0.00     |
| 563.47 | 0.0       | 0.00     |
| 564.02 | 0.0       | 0.00     |
| 564.63 | 0.0       | 0.00     |
| 565.27 | 0.0       | 0.00     |
| 567.61 | 0.1       | 0.00     |
| 568.83 | 0.0       | 0.00     |
| 569.48 | 0.0       | 0.00     |
| 570.96 | 0.0       | 0.00     |
| 572.19 | 259.0     | 0.66     |
| 573.56 | 0.3       | 0.00     |
| 575.09 | 140.0     | 0.36     |
| 576.26 | 0.0       | 0.00     |
| 577.07 | 1.2       | 0.00     |
| 577.79 | 0.0       | 0.00     |
| 578.79 | 0.0       | 0.00     |
| 579.92 | 0.0       | 0.00     |
| 580.53 | 0.0       | 0.00     |
| 581.75 | 374.5     | 0.96     |
| 583.86 | 0.0       | 0.00     |
| 584.56 | 0.0       | 0.00     |
| 585.22 | 0.0       | 0.00     |
| 585.84 | 0.0       | 0.00     |
| 586.52 | 0.0       | 0.00     |
| 587.47 | 11.0      | 0.03     |
| 588.07 | 0.0       | 0.00     |
| 588.95 | 1.7       | 0.00     |
| 590.38 | 0.0       | 0.00     |
| 591.51 | 0.0       | 0.00     |
| 592.48 | 0.0       | 0.00     |
| 593.89 | 0.0       | 0.00     |
| 595.05 | 15.9      | 0.04     |
| 595.96 | 0.0       | 0.00     |
| 597.28 | 0.0       | 0.00     |
| 598.43 | 0.0       | 0.00     |

Selwan-42A#698 RT: 2.40

T: {0,0} + c EI Full ms [50.00-1000.00]

m/z= 50.00-1000.04

| m/z    | Intensity | Relative |
|--------|-----------|----------|
| 599.21 | 0.0       | 0.00     |
| 600.12 | 322.4     | 0.83     |
| 600.87 | 0.9       | 0.00     |
| 602.05 | 260.3     | 0.67     |
| 603.09 | 0.0       | 0.00     |
| 603.93 | 0.2       | 0.00     |
| 604.51 | 0.0       | 0.00     |
| 605.47 | 0.0       | 0.00     |
| 606.53 | 0.1       | 0.00     |
| 607.24 | 0.0       | 0.00     |
| 607.94 | 0.0       | 0.00     |
| 608.69 | 0.0       | 0.00     |
| 609.34 | 0.0       | 0.00     |
| 610.56 | 282.5     | 0.72     |
| 611.54 | 0.1       | 0.00     |
| 612.62 | 0.0       | 0.00     |
| 613.49 | 257.3     | 0.66     |
| 615.84 | 0.1       | 0.00     |
| 616.50 | 0.0       | 0.00     |
| 617.56 | 0.2       | 0.00     |
| 618.07 | 0.0       | 0.00     |
| 618.78 | 333.1     | 0.85     |
| 619.81 | 0.0       | 0.00     |
| 620.53 | 0.0       | 0.00     |
| 621.18 | 0.0       | 0.00     |
| 622.49 | 0.0       | 0.00     |
| 623.52 | 0.0       | 0.00     |
| 624.05 | 694.1     | 1.78     |
| 625.10 | 0.0       | 0.00     |
| 625.69 | 1.7       | 0.00     |
| 626.34 | 0.0       | 0.00     |
| 627.83 | 1.4       | 0.00     |
| 628.64 | 0.0       | 0.00     |
| 629.17 | 0.0       | 0.00     |
| 630.84 | 196.1     | 0.50     |
| 631.78 | 0.0       | 0.00     |
| 632.71 | 0.0       | 0.00     |
| 633.58 | 280.5     | 0.72     |
| 635.01 | 1.7       | 0.00     |
| 636.04 | 0.0       | 0.00     |
| 636.90 | 0.0       | 0.00     |
| 637.52 | 0.2       | 0.00     |
| 639.56 | 151.3     | 0.39     |
| 640.69 | 0.0       | 0.00     |
| 641.38 | 0.0       | 0.00     |
| 642.60 | 29.0      | 0.07     |
| 644.21 | 228.9     | 0.59     |
| 644.82 | 0.0       | 0.00     |
| 645.55 | 0.0       | 0.00     |
| 646.20 | 260.3     | 0.67     |
| 647.68 | 0.0       | 0.00     |
| 649.18 | 28.4      | 0.07     |
| 650.20 | 0.0       | 0.00     |
| 650.82 | 0.0       | 0.00     |
| 651.74 | 0.0       | 0.00     |

Selwan-42A#698 RT: 2.40

T: {0,0} + c EI Full ms [50.00-1000.00]

m/z= 50.00-1000.04

| m/z    | Intensity | Relative |
|--------|-----------|----------|
| 653.01 | 1.2       | 0.00     |
| 654.40 | 290.1     | 0.74     |
| 655.30 | 0.0       | 0.00     |
| 656.48 | 0.3       | 0.00     |
| 657.13 | 0.0       | 0.00     |
| 657.77 | 0.0       | 0.00     |
| 658.42 | 0.1       | 0.00     |
| 659.32 | 233.5     | 0.60     |
| 660.49 | 368.0     | 0.94     |
| 661.38 | 0.0       | 0.00     |
| 661.91 | 0.0       | 0.00     |
| 662.79 | 0.0       | 0.00     |
| 663.81 | 0.9       | 0.00     |
| 665.11 | 228.3     | 0.59     |
| 665.78 | 0.0       | 0.00     |
| 666.39 | 0.0       | 0.00     |
| 667.06 | 0.0       | 0.00     |
| 668.15 | 0.0       | 0.00     |
| 668.87 | 318.3     | 0.82     |
| 669.81 | 0.0       | 0.00     |
| 670.32 | 13.2      | 0.03     |
| 671.01 | 0.9       | 0.00     |
| 672.91 | 0.0       | 0.00     |
| 673.49 | 242.7     | 0.62     |
| 676.34 | 0.0       | 0.00     |
| 678.08 | 330.0     | 0.85     |
| 678.88 | 222.3     | 0.57     |
| 681.12 | 328.7     | 0.84     |
| 681.76 | 0.0       | 0.00     |
| 682.94 | 0.0       | 0.00     |
| 683.78 | 13.4      | 0.03     |
| 685.42 | 0.0       | 0.00     |
| 686.26 | 0.0       | 0.00     |
| 687.39 | 0.0       | 0.00     |
| 687.97 | 0.1       | 0.00     |
| 688.47 | 0.0       | 0.00     |
| 689.74 | 0.0       | 0.00     |
| 690.43 | 22.7      | 0.06     |
| 691.75 | 0.0       | 0.00     |
| 693.00 | 0.0       | 0.00     |
| 693.55 | 258.8     | 0.66     |
| 694.29 | 0.1       | 0.00     |
| 696.28 | 0.0       | 0.00     |
| 697.14 | 0.0       | 0.00     |
| 698.10 | 11.2      | 0.03     |
| 699.81 | 171.3     | 0.44     |
| 700.33 | 35.2      | 0.09     |
| 701.44 | 227.5     | 0.58     |
| 702.11 | 0.0       | 0.00     |
| 702.63 | 0.0       | 0.00     |
| 703.17 | 0.0       | 0.00     |
| 703.91 | 0.0       | 0.00     |
| 704.79 | 0.0       | 0.00     |
| 706.09 | 47.9      | 0.12     |
| 706.93 | 0.0       | 0.00     |

Selwan-42A#698 RT: 2.40

T: {0,0} + c EI Full ms [50.00-1000.00]

m/z= 50.00-1000.04

| m/z    | Intensity | Relative |
|--------|-----------|----------|
| 707.81 | 613.8     | 1.57     |
| 708.62 | 0.0       | 0.00     |
| 709.38 | 41.1      | 0.11     |
| 710.00 | 0.0       | 0.00     |
| 711.44 | 0.0       | 0.00     |
| 712.05 | 0.0       | 0.00     |
| 712.88 | 0.0       | 0.00     |
| 713.44 | 0.0       | 0.00     |
| 714.38 | 500.7     | 1.28     |
| 714.95 | 0.0       | 0.00     |
| 716.17 | 0.0       | 0.00     |
| 716.84 | 0.0       | 0.00     |
| 717.50 | 210.6     | 0.54     |
| 718.69 | 0.0       | 0.00     |
| 719.45 | 0.0       | 0.00     |
| 720.06 | 0.0       | 0.00     |
| 720.90 | 0.0       | 0.00     |
| 721.65 | 0.1       | 0.00     |
| 722.88 | 0.5       | 0.00     |
| 723.42 | 0.0       | 0.00     |
| 724.85 | 377.3     | 0.97     |
| 726.04 | 0.0       | 0.00     |
| 726.99 | 0.0       | 0.00     |
| 728.16 | 118.7     | 0.30     |
| 729.57 | 0.0       | 0.00     |
| 730.88 | 0.0       | 0.00     |
| 731.87 | 41.1      | 0.11     |
| 732.62 | 0.0       | 0.00     |
| 733.28 | 0.0       | 0.00     |
| 734.60 | 0.2       | 0.00     |
| 735.90 | 0.0       | 0.00     |
| 736.47 | 0.0       | 0.00     |
| 737.21 | 0.0       | 0.00     |
| 737.90 | 0.0       | 0.00     |
| 738.40 | 374.2     | 0.96     |
| 739.08 | 321.1     | 0.82     |
| 740.14 | 41.3      | 0.11     |
| 741.15 | 0.0       | 0.00     |
| 742.35 | 0.0       | 0.00     |
| 743.16 | 0.0       | 0.00     |
| 743.75 | 0.0       | 0.00     |
| 744.99 | 42.7      | 0.11     |
| 745.63 | 1.1       | 0.00     |
| 746.94 | 0.0       | 0.00     |
| 747.80 | 0.0       | 0.00     |
| 748.72 | 0.0       | 0.00     |
| 750.41 | 0.0       | 0.00     |
| 751.47 | 23.0      | 0.06     |
| 752.35 | 1.8       | 0.00     |
| 753.35 | 22.8      | 0.06     |
| 753.88 | 0.0       | 0.00     |
| 755.84 | 0.0       | 0.00     |
| 756.51 | 0.0       | 0.00     |
| 757.18 | 0.0       | 0.00     |
| 757.69 | 0.0       | 0.00     |



Selwan-42A#698 RT: 2.40

T: {0,0} + c EI Full ms [50.00-1000.00]

m/z= 50.00-1000.04

| m/z    | Intensity | Relative |
|--------|-----------|----------|
| 758.61 | 0.0       | 0.00     |
| 759.24 | 0.0       | 0.00     |
| 760.36 | 0.0       | 0.00     |
| 761.54 | 10.9      | 0.03     |
| 762.92 | 11.1      | 0.03     |
| 764.49 | 405.9     | 1.04     |
| 765.17 | 0.0       | 0.00     |
| 766.24 | 0.0       | 0.00     |
| 767.32 | 0.4       | 0.00     |
| 767.88 | 13.2      | 0.03     |
| 768.43 | 15.6      | 0.04     |
| 769.15 | 0.0       | 0.00     |
| 770.80 | 29.7      | 0.08     |
| 772.07 | 0.0       | 0.00     |
| 773.40 | 0.0       | 0.00     |
| 774.03 | 0.0       | 0.00     |
| 774.69 | 0.0       | 0.00     |
| 775.71 | 0.0       | 0.00     |
| 776.26 | 1.3       | 0.00     |
| 777.01 | 286.6     | 0.73     |
| 777.87 | 321.0     | 0.82     |
| 778.64 | 23.2      | 0.06     |
| 779.56 | 0.0       | 0.00     |
| 780.15 | 0.0       | 0.00     |
| 780.96 | 0.0       | 0.00     |
| 782.02 | 0.0       | 0.00     |
| 783.12 | 9.0       | 0.02     |
| 784.38 | 0.0       | 0.00     |
| 785.67 | 0.0       | 0.00     |
| 786.25 | 13.4      | 0.03     |
| 787.62 | 493.5     | 1.27     |
| 788.91 | 0.0       | 0.00     |
| 789.46 | 0.0       | 0.00     |
| 790.30 | 0.0       | 0.00     |
| 791.26 | 0.0       | 0.00     |
| 791.92 | 0.0       | 0.00     |
| 792.59 | 0.0       | 0.00     |
| 794.09 | 0.0       | 0.00     |
| 795.04 | 0.0       | 0.00     |
| 795.70 | 0.0       | 0.00     |
| 796.34 | 0.0       | 0.00     |
| 797.28 | 0.0       | 0.00     |
| 797.96 | 0.0       | 0.00     |
| 798.62 | 0.0       | 0.00     |
| 799.16 | 0.0       | 0.00     |
| 799.78 | 0.0       | 0.00     |
| 800.41 | 266.2     | 0.68     |
| 801.37 | 0.0       | 0.00     |
| 802.00 | 261.8     | 0.67     |
| 802.61 | 0.0       | 0.00     |
| 803.60 | 320.6     | 0.82     |
| 804.35 | 0.0       | 0.00     |
| 805.73 | 0.0       | 0.00     |
| 806.43 | 0.3       | 0.00     |
| 807.05 | 0.0       | 0.00     |

Selwan-42A#698 RT: 2.40

T: {0,0} + c EI Full ms [50.00-1000.00]

m/z= 50.00-1000.04

| m/z    | Intensity | Relative |
|--------|-----------|----------|
| 807.58 | 0.4       | 0.00     |
| 808.34 | 315.3     | 0.81     |
| 808.91 | 0.0       | 0.00     |
| 810.13 | 0.0       | 0.00     |
| 811.58 | 0.0       | 0.00     |
| 812.33 | 0.0       | 0.00     |
| 812.99 | 0.0       | 0.00     |
| 813.50 | 0.0       | 0.00     |
| 814.25 | 0.0       | 0.00     |
| 814.88 | 2.0       | 0.01     |
| 816.03 | 0.0       | 0.00     |
| 816.79 | 0.0       | 0.00     |
| 817.54 | 270.4     | 0.69     |
| 818.60 | 0.0       | 0.00     |
| 819.33 | 0.0       | 0.00     |
| 819.88 | 0.0       | 0.00     |
| 820.74 | 0.0       | 0.00     |
| 821.28 | 0.0       | 0.00     |
| 822.06 | 0.0       | 0.00     |
| 823.37 | 15.6      | 0.04     |
| 824.76 | 0.0       | 0.00     |
| 825.29 | 0.0       | 0.00     |
| 826.04 | 0.0       | 0.00     |
| 826.71 | 0.0       | 0.00     |
| 827.29 | 0.0       | 0.00     |
| 828.13 | 0.0       | 0.00     |
| 828.69 | 0.0       | 0.00     |
| 829.51 | 0.0       | 0.00     |
| 830.26 | 0.0       | 0.00     |
| 830.91 | 1.6       | 0.00     |
| 831.89 | 0.0       | 0.00     |
| 832.70 | 715.4     | 1.83     |
| 833.40 | 0.3       | 0.00     |
| 834.64 | 0.0       | 0.00     |
| 835.36 | 260.5     | 0.67     |
| 835.94 | 0.0       | 0.00     |
| 836.79 | 198.5     | 0.51     |
| 837.76 | 14.3      | 0.04     |
| 839.22 | 1.4       | 0.00     |
| 839.74 | 0.0       | 0.00     |
| 840.37 | 0.1       | 0.00     |
| 841.53 | 0.3       | 0.00     |
| 842.32 | 0.0       | 0.00     |
| 843.10 | 0.0       | 0.00     |
| 843.78 | 0.0       | 0.00     |
| 844.60 | 1.9       | 0.00     |
| 845.34 | 1.1       | 0.00     |
| 846.56 | 0.1       | 0.00     |
| 847.99 | 36.6      | 0.09     |
| 848.63 | 0.0       | 0.00     |
| 849.56 | 0.0       | 0.00     |
| 851.27 | 0.0       | 0.00     |
| 852.20 | 0.0       | 0.00     |
| 852.79 | 28.7      | 0.07     |
| 853.66 | 0.0       | 0.00     |

Selwan-42A#698 RT: 2.40

T: {0,0} + c EI Full ms [50.00-1000.00]

m/z= 50.00-1000.04

| m/z    | Intensity | Relative |
|--------|-----------|----------|
| 854.66 | 0.0       | 0.00     |
| 855.46 | 0.0       | 0.00     |
| 857.17 | 0.0       | 0.00     |
| 857.94 | 0.2       | 0.00     |
| 859.00 | 0.0       | 0.00     |
| 860.06 | 0.0       | 0.00     |
| 860.77 | 0.0       | 0.00     |
| 862.02 | 0.0       | 0.00     |
| 862.95 | 0.0       | 0.00     |
| 863.56 | 0.2       | 0.00     |
| 864.70 | 0.0       | 0.00     |
| 866.38 | 320.6     | 0.82     |
| 867.12 | 0.0       | 0.00     |
| 867.98 | 36.2      | 0.09     |
| 868.79 | 0.0       | 0.00     |
| 869.94 | 0.0       | 0.00     |
| 870.75 | 0.0       | 0.00     |
| 871.37 | 0.0       | 0.00     |
| 872.32 | 0.0       | 0.00     |
| 872.91 | 0.0       | 0.00     |
| 873.52 | 0.0       | 0.00     |
| 874.05 | 0.0       | 0.00     |
| 874.93 | 260.3     | 0.67     |
| 875.62 | 176.7     | 0.45     |
| 876.43 | 10.9      | 0.03     |
| 876.94 | 0.0       | 0.00     |
| 877.60 | 0.0       | 0.00     |
| 878.34 | 0.0       | 0.00     |
| 879.22 | 0.0       | 0.00     |
| 879.95 | 0.0       | 0.00     |
| 880.67 | 0.0       | 0.00     |
| 881.51 | 0.2       | 0.00     |
| 882.09 | 11.4      | 0.03     |
| 882.65 | 0.0       | 0.00     |
| 883.46 | 1.3       | 0.00     |
| 884.37 | 0.0       | 0.00     |
| 884.98 | 0.0       | 0.00     |
| 885.79 | 176.9     | 0.45     |
| 886.56 | 35.3      | 0.09     |
| 887.07 | 0.0       | 0.00     |
| 888.23 | 0.0       | 0.00     |
| 888.77 | 0.0       | 0.00     |
| 890.09 | 0.0       | 0.00     |
| 890.77 | 0.0       | 0.00     |
| 891.41 | 8.6       | 0.02     |
| 892.45 | 0.0       | 0.00     |
| 893.30 | 0.0       | 0.00     |
| 893.91 | 0.0       | 0.00     |
| 895.06 | 0.0       | 0.00     |
| 895.76 | 0.0       | 0.00     |
| 896.39 | 0.0       | 0.00     |
| 896.92 | 0.0       | 0.00     |
| 898.20 | 0.0       | 0.00     |
| 898.73 | 0.0       | 0.00     |
| 899.35 | 0.0       | 0.00     |

Selwan-42A#698 RT: 2.40

T: {0,0} + c EI Full ms [50.00-1000.00]

m/z= 50.00-1000.04

| m/z    | Intensity | Relative |
|--------|-----------|----------|
| 899.95 | 0.0       | 0.00     |
| 900.57 | 263.0     | 0.67     |
| 901.28 | 0.0       | 0.00     |
| 902.04 | 0.0       | 0.00     |
| 902.80 | 0.0       | 0.00     |
| 903.30 | 0.0       | 0.00     |
| 904.43 | 35.3      | 0.09     |
| 905.61 | 0.0       | 0.00     |
| 906.47 | 257.1     | 0.66     |
| 907.71 | 0.2       | 0.00     |
| 908.29 | 0.0       | 0.00     |
| 909.25 | 0.3       | 0.00     |
| 910.72 | 0.0       | 0.00     |
| 911.43 | 0.1       | 0.00     |
| 912.88 | 1.6       | 0.00     |
| 913.91 | 446.2     | 1.14     |
| 915.00 | 1289.0    | 3.30     |
| 915.74 | 0.1       | 0.00     |
| 916.67 | 0.0       | 0.00     |
| 917.99 | 0.0       | 0.00     |
| 918.65 | 0.0       | 0.00     |
| 920.84 | 0.0       | 0.00     |
| 921.81 | 47.6      | 0.12     |
| 922.49 | 0.0       | 0.00     |
| 923.49 | 0.0       | 0.00     |
| 924.68 | 0.0       | 0.00     |
| 925.43 | 0.0       | 0.00     |
| 926.69 | 0.0       | 0.00     |
| 927.50 | 0.0       | 0.00     |
| 928.03 | 10.5      | 0.03     |
| 928.61 | 0.0       | 0.00     |
| 929.63 | 0.0       | 0.00     |
| 930.29 | 0.0       | 0.00     |
| 931.21 | 0.2       | 0.00     |
| 932.61 | 396.2     | 1.02     |
| 933.53 | 0.3       | 0.00     |
| 934.99 | 0.0       | 0.00     |
| 935.74 | 295.6     | 0.76     |
| 936.72 | 0.0       | 0.00     |
| 937.76 | 8.3       | 0.02     |
| 938.55 | 0.1       | 0.00     |
| 941.23 | 0.0       | 0.00     |
| 942.08 | 0.0       | 0.00     |
| 943.03 | 519.6     | 1.33     |
| 944.12 | 314.9     | 0.81     |
| 945.61 | 34.5      | 0.09     |
| 946.47 | 0.1       | 0.00     |
| 947.03 | 0.0       | 0.00     |
| 947.76 | 0.0       | 0.00     |
| 948.69 | 0.0       | 0.00     |
| 949.51 | 0.0       | 0.00     |
| 950.02 | 0.0       | 0.00     |
| 951.18 | 0.0       | 0.00     |
| 952.25 | 0.0       | 0.00     |
| 953.10 | 0.0       | 0.00     |

Selwan-42A#698 RT: 2.40

T: {0,0} + c EI Full ms [50.00-1000.00]

m/z= 50.00-1000.04

| m/z    | Intensity | Relative |
|--------|-----------|----------|
| 953.86 | 0.0       | 0.00     |
| 954.93 | 0.0       | 0.00     |
| 955.94 | 0.0       | 0.00     |
| 956.64 | 0.0       | 0.00     |
| 957.18 | 0.0       | 0.00     |
| 958.99 | 0.2       | 0.00     |
| 959.81 | 0.2       | 0.00     |
| 961.08 | 3.9       | 0.01     |
| 961.89 | 0.0       | 0.00     |
| 962.67 | 0.0       | 0.00     |
| 963.46 | 75.1      | 0.19     |
| 964.19 | 0.0       | 0.00     |
| 965.56 | 0.0       | 0.00     |
| 967.03 | 1.6       | 0.00     |
| 968.42 | 0.2       | 0.00     |
| 969.58 | 0.0       | 0.00     |
| 970.43 | 1.1       | 0.00     |
| 970.94 | 268.1     | 0.69     |
| 971.84 | 1.6       | 0.00     |
| 972.63 | 0.0       | 0.00     |
| 973.59 | 0.0       | 0.00     |
| 974.55 | 50.5      | 0.13     |
| 975.09 | 0.0       | 0.00     |
| 975.71 | 0.0       | 0.00     |
| 976.93 | 25.6      | 0.07     |
| 977.66 | 378.7     | 0.97     |
| 978.33 | 0.0       | 0.00     |
| 978.88 | 267.2     | 0.68     |
| 979.74 | 0.0       | 0.00     |
| 981.02 | 0.0       | 0.00     |
| 981.77 | 443.2     | 1.14     |
| 982.35 | 0.0       | 0.00     |
| 983.01 | 0.3       | 0.00     |
| 983.93 | 0.0       | 0.00     |
| 984.54 | 0.0       | 0.00     |
| 985.48 | 0.5       | 0.00     |
| 986.41 | 0.1       | 0.00     |
| 987.50 | 0.0       | 0.00     |
| 988.04 | 0.0       | 0.00     |
| 988.82 | 0.0       | 0.00     |
| 989.36 | 0.0       | 0.00     |
| 990.11 | 0.0       | 0.00     |
| 990.91 | 0.3       | 0.00     |
| 991.68 | 0.0       | 0.00     |
| 992.19 | 0.0       | 0.00     |
| 993.42 | 1.6       | 0.00     |
| 993.95 | 0.0       | 0.00     |
| 994.78 | 0.0       | 0.00     |
| 995.99 | 0.0       | 0.00     |
| 996.52 | 0.0       | 0.00     |
| 997.73 | 0.0       | 0.00     |
| 998.75 | 0.0       | 0.00     |
| 999.44 | 35.0      | 0.09     |
| 999.99 | 0.1       | 0.00     |
