# Supplementary material for: A Simple and Efficient Multicomponent Synthesis of Novel Pyrazole, N-aminopyridine and Pyrazolo[3,4-b]Pyridine Derivatives in Water
Source: Preprints.org preprint supplement (doi:10.20944/preprints202312.1232.v1), 2023-12-28
Supplement: Supplementary file 25 [file supplementary]

Peak Find - 41.jws

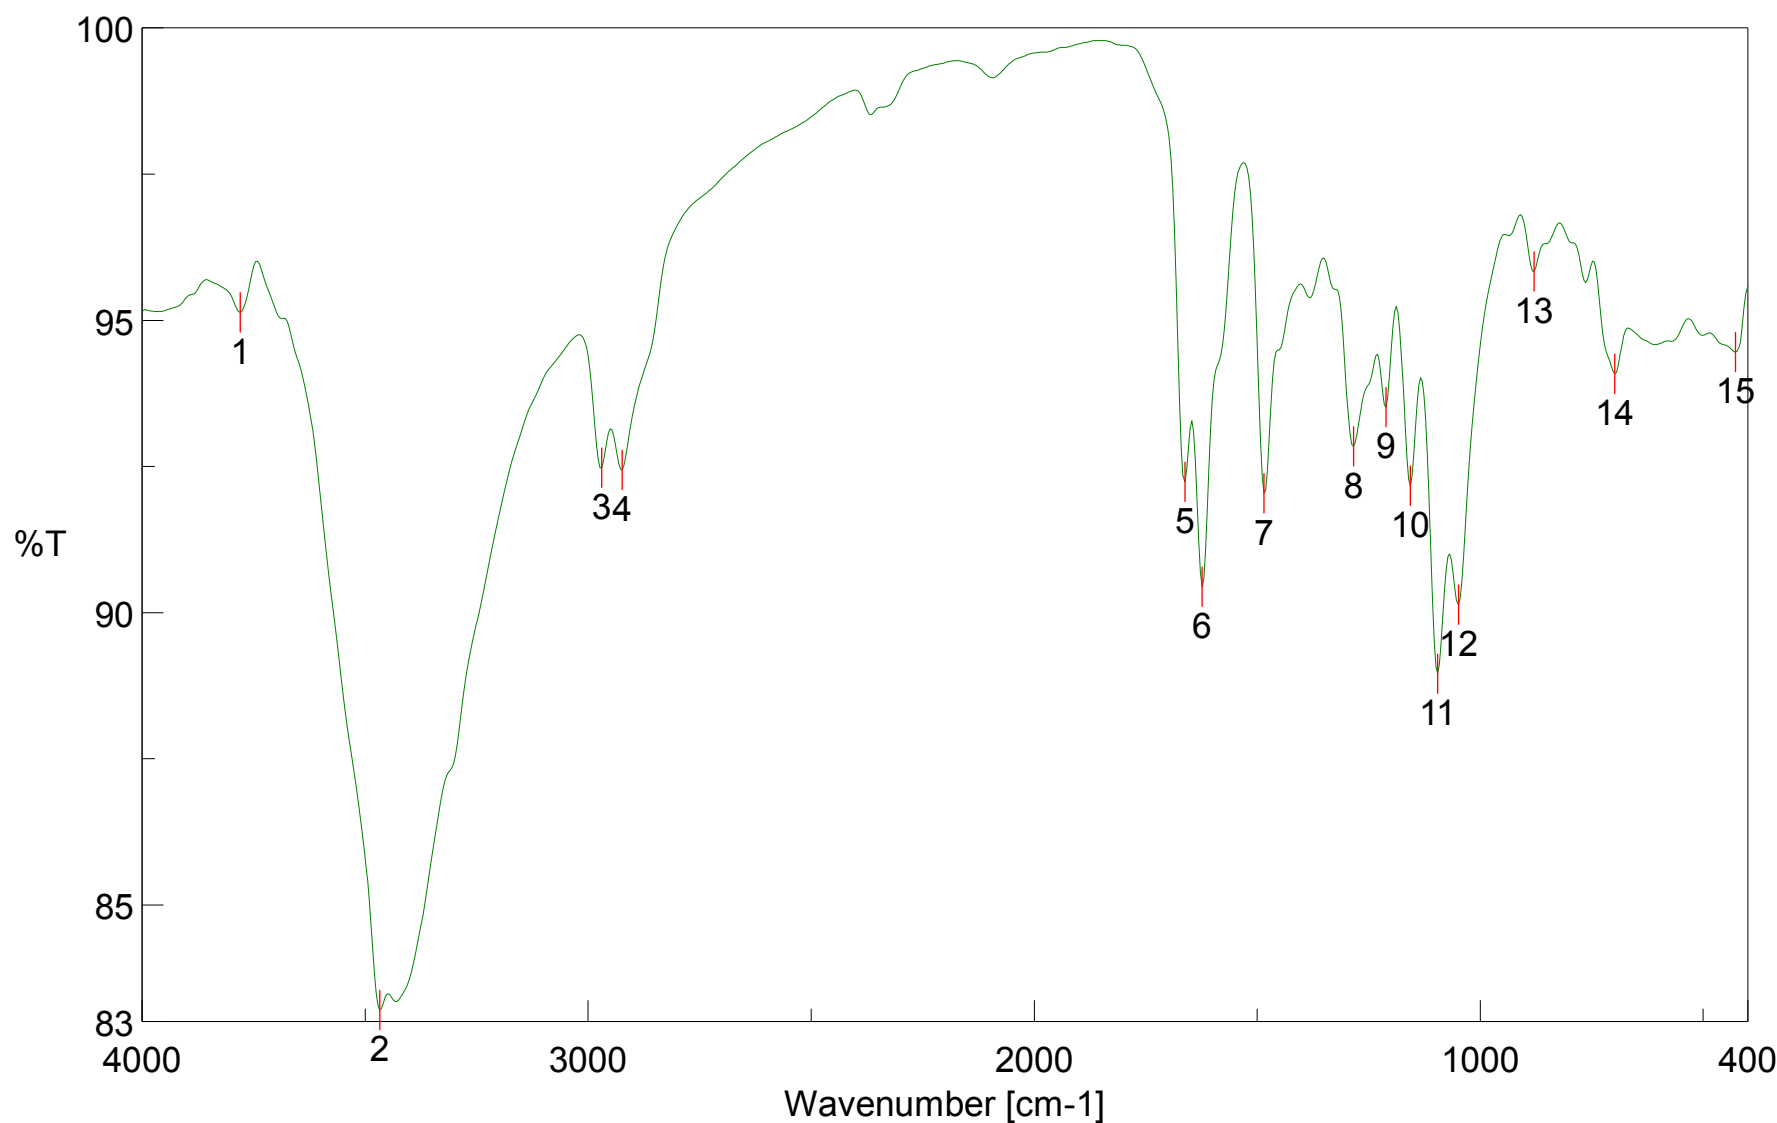

[ Result of Peak Picking ]

| No. | Position | Intensity | No. | Position | Intensity | No. | Position | Intensity |
|-----|----------|-----------|-----|----------|-----------|-----|----------|-----------|
| 1   | 3779.8   | 95.1326   | 2   | 3467.38  | 83.1954   | 3   | 2969.84  | 92.4742   |
| 4   | 2923.56  | 92.4395   | 5   | 1662.34  | 92.233    | 6   | 1623.77  | 90.4401   |
| 7   | 1484.92  | 92.0369   | 8   | 1284.36  | 92.8371   | 9   | 1211.08  | 93.5137   |
| 10  | 1157.08  | 92.1677   | 11  | 1095.37  | 88.946    | 12  | 1049.09  | 90.1346   |
| 13  | 879.381  | 95.8295   | 14  | 698.105  | 94.0781   | 15  | 428.12   | 94.4504   |
