# Supplementary material for: A Simple and Efficient Multicomponent Synthesis of Novel Pyrazole, N-aminopyridine and Pyrazolo[3,4-b]Pyridine Derivatives in Water
Source: Preprints.org preprint supplement (doi:10.20944/preprints202312.1232.v1), 2023-12-28
Supplement: Supplementary file 27 [file supplementary]

RT: 0.00 - 4.21

NL:  
2.87E5  
TIC MS  
Selwan-59

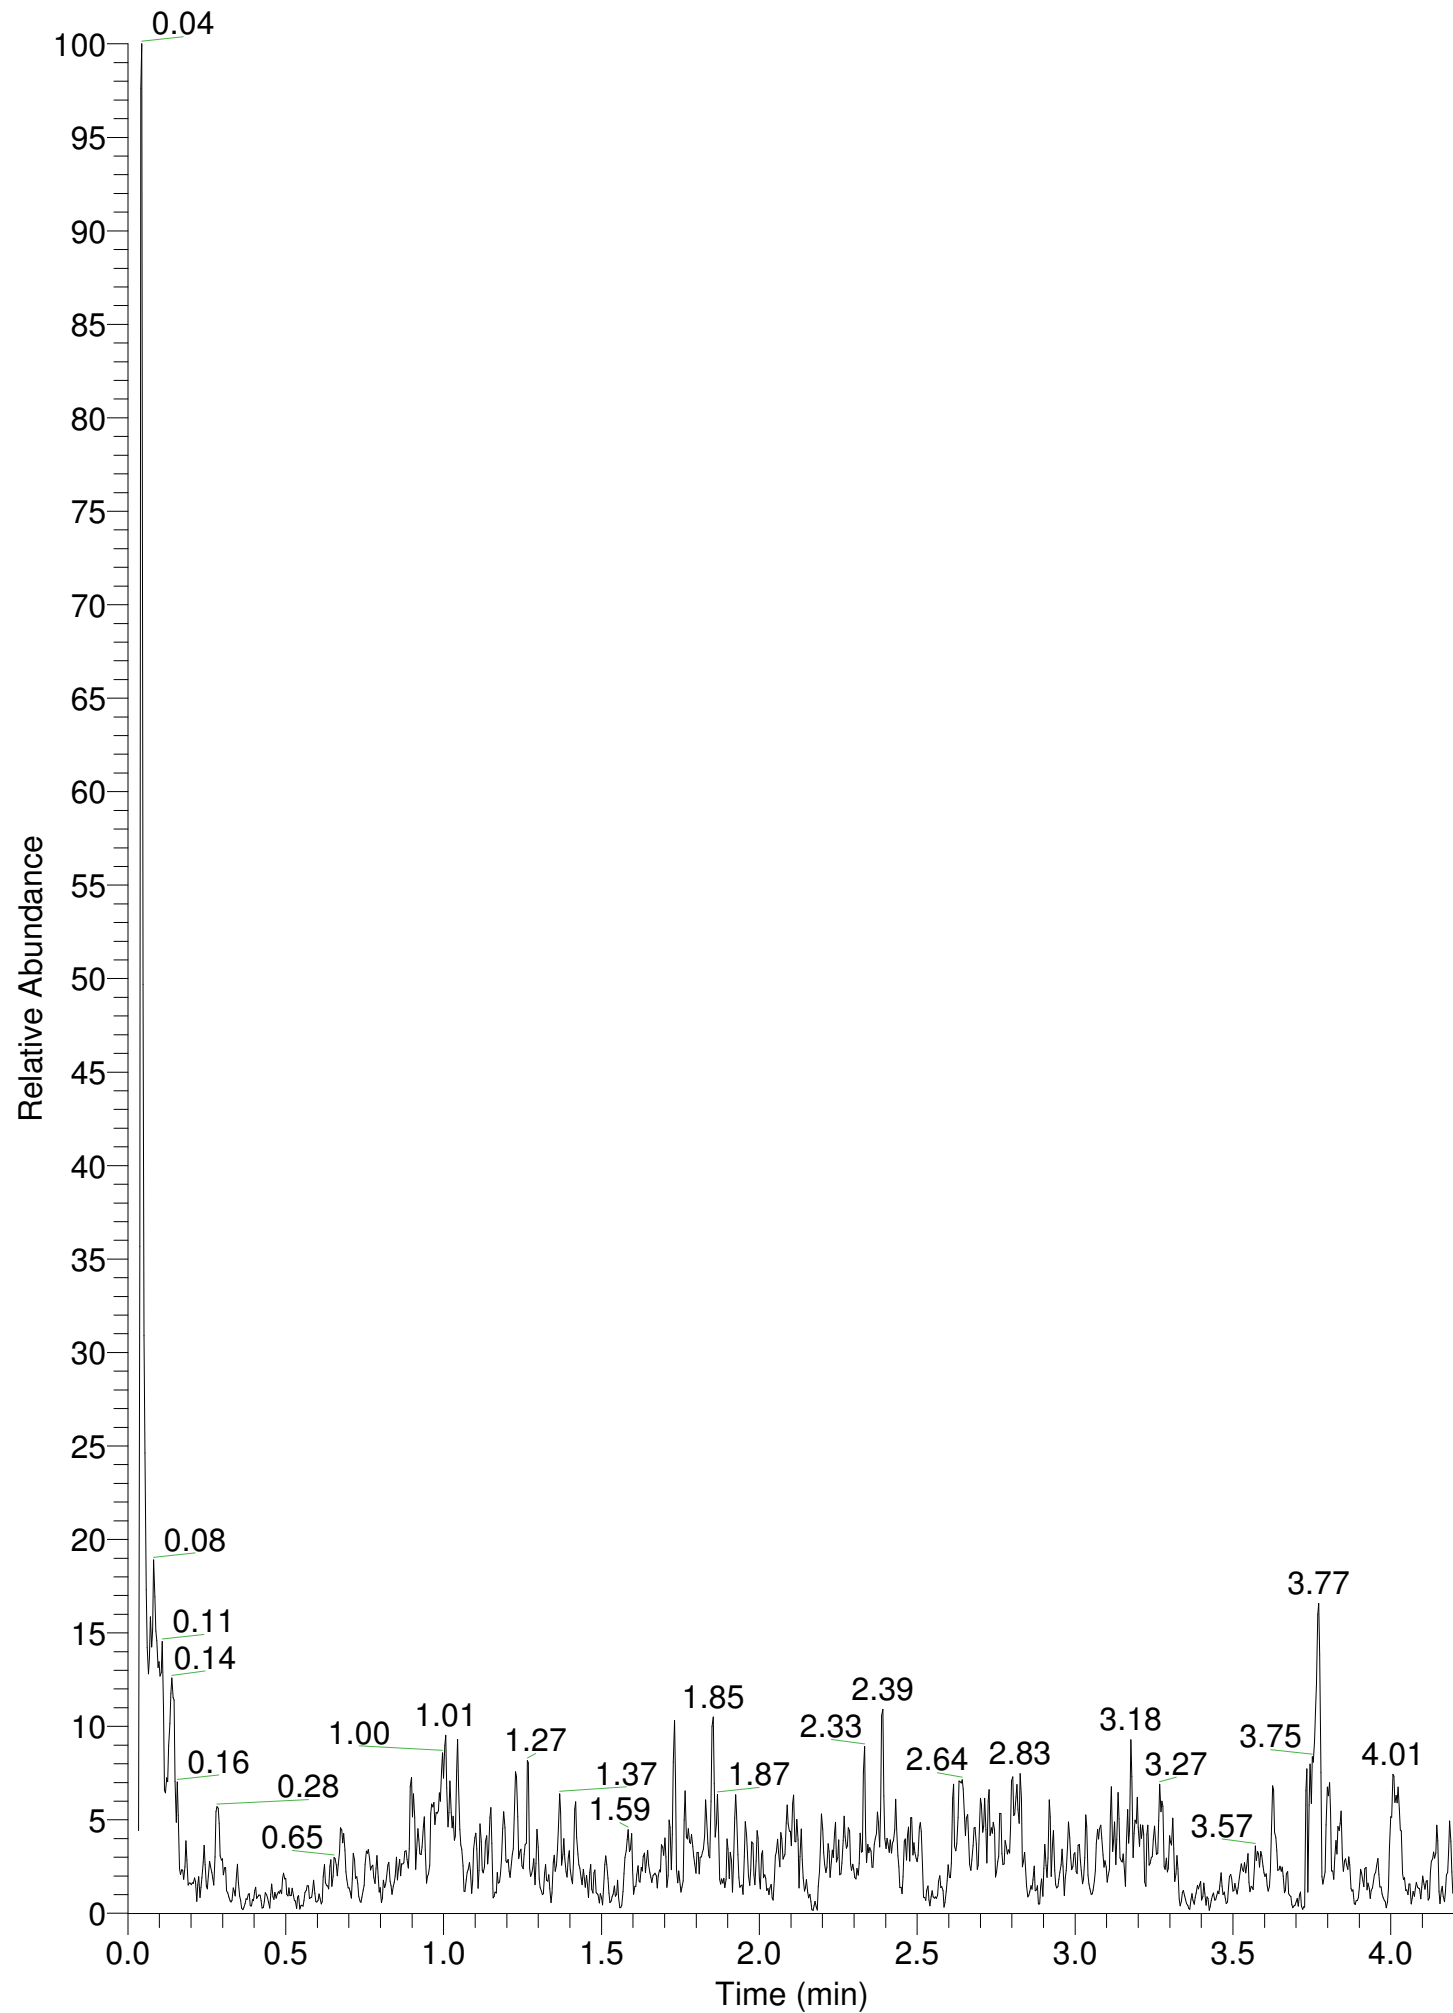

Selwan-59 #15 RT: 0.08 AV: 1 NL: 1.15E4

T: {0,0} + c EI Full ms [50.00-1000.00]

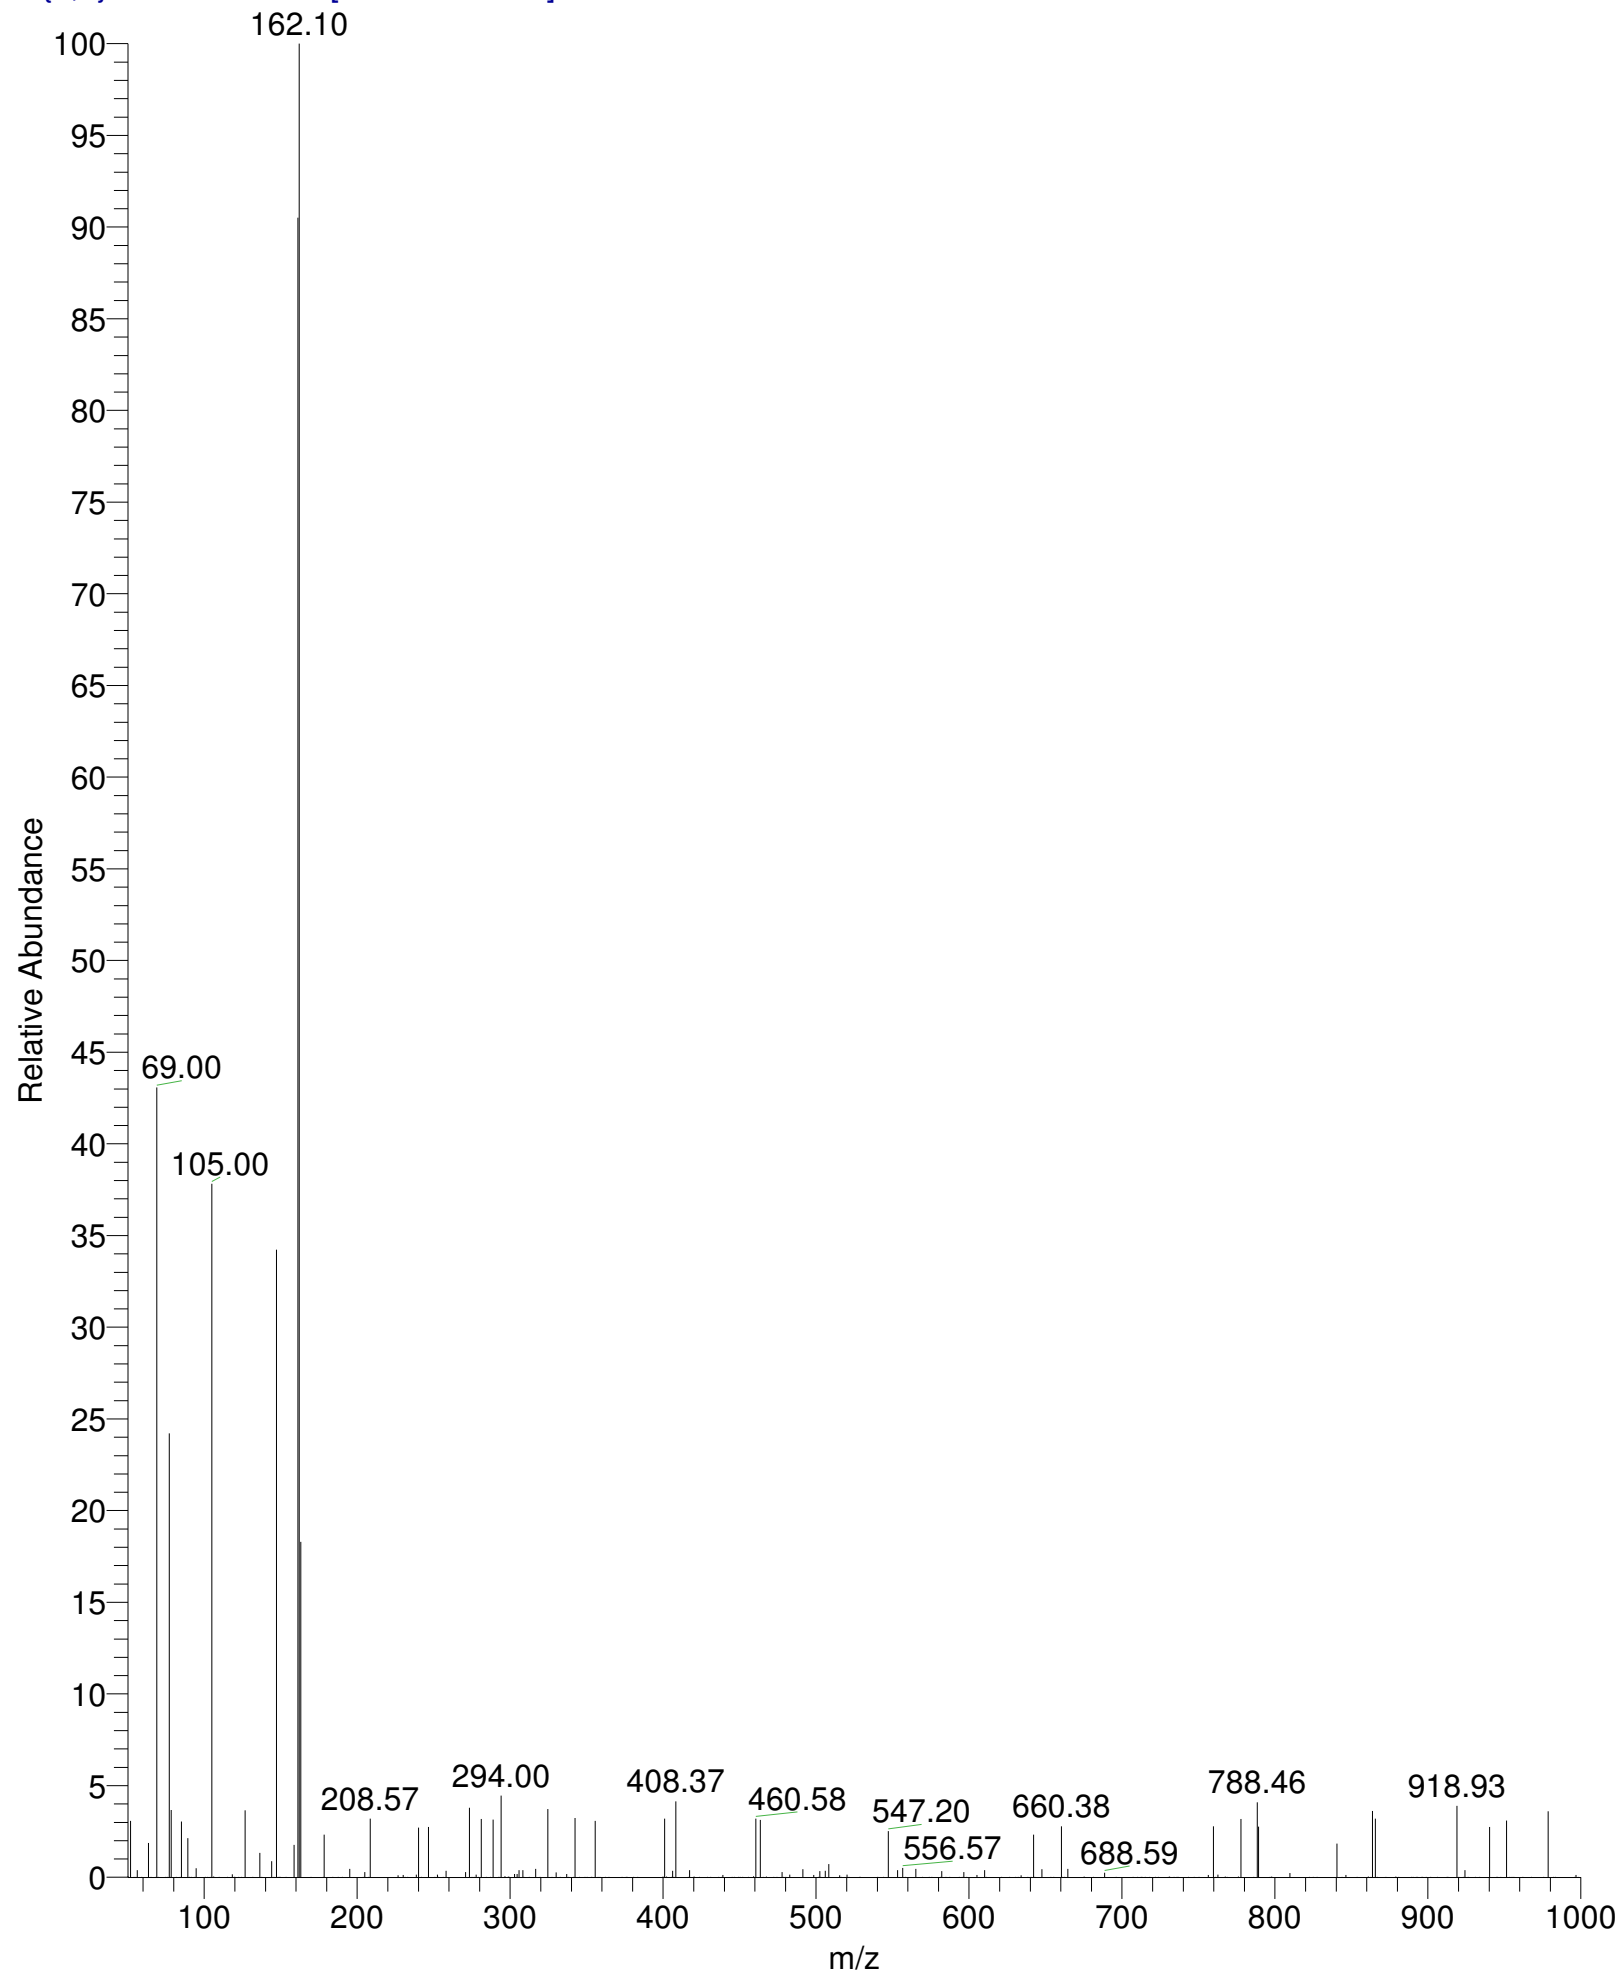

Selwan-59#15 RT: 0.08

T: {0,0} + c EI Full ms [50.00-1000.00]

m/z= 50.00-1000.04

| m/z    | Intensity | Relative |
|--------|-----------|----------|
| 50.01  | 5.9       | 0.05     |
| 50.57  | 0.2       | 0.00     |
| 51.73  | 351.3     | 3.07     |
| 54.17  | 0.0       | 0.00     |
| 55.30  | 0.1       | 0.00     |
| 56.16  | 43.7      | 0.38     |
| 59.07  | 0.0       | 0.00     |
| 63.48  | 212.6     | 1.86     |
| 65.21  | 0.2       | 0.00     |
| 68.24  | 0.1       | 0.00     |
| 69.00  | 4932.9    | 43.07    |
| 69.88  | 0.2       | 0.00     |
| 74.83  | 0.2       | 0.00     |
| 76.14  | 0.2       | 0.00     |
| 77.00  | 2772.1    | 24.20    |
| 77.75  | 0.1       | 0.00     |
| 78.44  | 417.8     | 3.65     |
| 81.78  | 0.0       | 0.00     |
| 84.18  | 0.3       | 0.00     |
| 85.09  | 346.8     | 3.03     |
| 89.15  | 242.0     | 2.11     |
| 90.29  | 0.0       | 0.00     |
| 91.61  | 0.0       | 0.00     |
| 93.92  | 0.3       | 0.00     |
| 94.73  | 54.3      | 0.47     |
| 100.65 | 0.1       | 0.00     |
| 102.23 | 0.6       | 0.01     |
| 103.80 | 0.1       | 0.00     |
| 105.00 | 4330.2    | 37.81    |
| 106.02 | 2.7       | 0.02     |
| 106.68 | 0.0       | 0.00     |
| 109.69 | 0.0       | 0.00     |
| 115.27 | 0.1       | 0.00     |
| 118.35 | 16.1      | 0.14     |
| 119.53 | 1.9       | 0.02     |
| 120.05 | 0.1       | 0.00     |
| 122.58 | 0.3       | 0.00     |
| 124.31 | 0.0       | 0.00     |
| 126.75 | 415.8     | 3.63     |
| 131.60 | 0.9       | 0.01     |
| 136.22 | 150.5     | 1.31     |
| 137.53 | 0.0       | 0.00     |
| 143.96 | 98.1      | 0.86     |
| 145.53 | 0.2       | 0.00     |
| 147.08 | 3918.4    | 34.21    |
| 148.26 | 0.5       | 0.00     |
| 148.97 | 0.1       | 0.00     |
| 149.73 | 1.8       | 0.02     |
| 153.55 | 0.0       | 0.00     |
| 158.61 | 200.9     | 1.75     |
| 161.15 | 10364.2   | 90.49    |
| 162.10 | 11453.6   | 100.00   |
| 163.13 | 2094.5    | 18.29    |
| 169.72 | 0.0       | 0.00     |
| 177.76 | 0.0       | 0.00     |

Selwan-59#15 RT: 0.08

T: {0,0} + c EI Full ms [50.00-1000.00]

m/z= 50.00-1000.04

| m/z    | Intensity | Relative |
|--------|-----------|----------|
| 178.31 | 264.8     | 2.31     |
| 184.07 | 0.1       | 0.00     |
| 187.45 | 0.0       | 0.00     |
| 190.27 | 0.2       | 0.00     |
| 195.15 | 51.8      | 0.45     |
| 203.84 | 0.0       | 0.00     |
| 204.88 | 31.6      | 0.28     |
| 207.39 | 0.0       | 0.00     |
| 208.57 | 363.8     | 3.18     |
| 226.70 | 11.3      | 0.10     |
| 230.05 | 13.8      | 0.12     |
| 231.27 | 0.1       | 0.00     |
| 233.01 | 0.0       | 0.00     |
| 238.65 | 14.1      | 0.12     |
| 240.02 | 309.4     | 2.70     |
| 242.06 | 0.2       | 0.00     |
| 246.50 | 313.3     | 2.74     |
| 250.80 | 0.0       | 0.00     |
| 252.33 | 14.1      | 0.12     |
| 253.06 | 0.0       | 0.00     |
| 256.16 | 0.0       | 0.00     |
| 258.11 | 38.1      | 0.33     |
| 270.80 | 31.9      | 0.28     |
| 273.41 | 432.7     | 3.78     |
| 275.01 | 0.2       | 0.00     |
| 276.49 | 0.0       | 0.00     |
| 277.65 | 14.5      | 0.13     |
| 279.12 | 0.0       | 0.00     |
| 281.13 | 362.1     | 3.16     |
| 284.43 | 0.1       | 0.00     |
| 287.14 | 0.2       | 0.00     |
| 288.91 | 359.4     | 3.14     |
| 292.45 | 0.1       | 0.00     |
| 293.20 | 0.2       | 0.00     |
| 294.00 | 509.3     | 4.45     |
| 296.58 | 4.9       | 0.04     |
| 298.42 | 0.0       | 0.00     |
| 299.03 | 2.0       | 0.02     |
| 302.81 | 18.5      | 0.16     |
| 304.47 | 18.6      | 0.16     |
| 305.73 | 43.6      | 0.38     |
| 308.28 | 43.5      | 0.38     |
| 308.93 | 0.3       | 0.00     |
| 312.36 | 1.0       | 0.01     |
| 316.55 | 50.1      | 0.44     |
| 319.49 | 1.8       | 0.02     |
| 324.50 | 424.3     | 3.70     |
| 327.39 | 0.0       | 0.00     |
| 329.96 | 29.4      | 0.26     |
| 332.85 | 0.1       | 0.00     |
| 336.93 | 18.6      | 0.16     |
| 338.14 | 0.4       | 0.00     |
| 341.23 | 0.0       | 0.00     |
| 342.30 | 367.9     | 3.21     |
| 345.29 | 0.1       | 0.00     |

Selwan-59#15 RT: 0.08

T: {0,0} + c EI Full ms [50.00-1000.00]

m/z= 50.00-1000.04

| m/z    | Intensity | Relative |
|--------|-----------|----------|
| 348.78 | 0.0       | 0.00     |
| 350.34 | 0.0       | 0.00     |
| 352.98 | 0.0       | 0.00     |
| 353.51 | 0.1       | 0.00     |
| 355.58 | 351.5     | 3.07     |
| 357.34 | 0.0       | 0.00     |
| 358.76 | 0.0       | 0.00     |
| 362.21 | 1.8       | 0.02     |
| 364.59 | 1.8       | 0.02     |
| 373.12 | 0.2       | 0.00     |
| 375.75 | 1.5       | 0.01     |
| 376.53 | 0.0       | 0.00     |
| 380.63 | 0.4       | 0.00     |
| 383.43 | 0.0       | 0.00     |
| 399.92 | 2.1       | 0.02     |
| 400.86 | 365.2     | 3.19     |
| 402.18 | 2.1       | 0.02     |
| 405.54 | 0.1       | 0.00     |
| 406.10 | 39.2      | 0.34     |
| 407.05 | 1.5       | 0.01     |
| 408.37 | 473.0     | 4.13     |
| 416.35 | 0.0       | 0.00     |
| 417.33 | 43.2      | 0.38     |
| 420.26 | 3.0       | 0.03     |
| 423.82 | 0.0       | 0.00     |
| 429.09 | 0.1       | 0.00     |
| 431.17 | 0.0       | 0.00     |
| 436.32 | 0.0       | 0.00     |
| 438.47 | 0.0       | 0.00     |
| 439.10 | 13.8      | 0.12     |
| 445.03 | 0.0       | 0.00     |
| 446.61 | 0.0       | 0.00     |
| 449.25 | 0.1       | 0.00     |
| 450.29 | 0.0       | 0.00     |
| 452.11 | 0.0       | 0.00     |
| 455.86 | 0.0       | 0.00     |
| 459.21 | 4.4       | 0.04     |
| 460.58 | 365.8     | 3.19     |
| 463.51 | 356.1     | 3.11     |
| 465.34 | 0.1       | 0.00     |
| 467.58 | 2.1       | 0.02     |
| 472.20 | 0.1       | 0.00     |
| 474.33 | 0.0       | 0.00     |
| 477.80 | 30.9      | 0.27     |
| 478.69 | 1.8       | 0.02     |
| 480.26 | 0.0       | 0.00     |
| 482.67 | 14.3      | 0.12     |
| 491.36 | 49.2      | 0.43     |
| 498.45 | 12.2      | 0.11     |
| 501.66 | 0.0       | 0.00     |
| 502.33 | 36.7      | 0.32     |
| 503.15 | 0.0       | 0.00     |
| 506.01 | 38.4      | 0.34     |
| 508.38 | 81.9      | 0.71     |
| 515.37 | 11.8      | 0.10     |

Selwan-59#15 RT: 0.08

T: {0,0} + c EI Full ms [50.00-1000.00]

m/z= 50.00-1000.04

| m/z    | Intensity | Relative |
|--------|-----------|----------|
| 516.39 | 0.0       | 0.00     |
| 520.14 | 14.4      | 0.13     |
| 521.55 | 1.8       | 0.02     |
| 528.28 | 0.2       | 0.00     |
| 528.95 | 0.0       | 0.00     |
| 540.26 | 0.0       | 0.00     |
| 544.06 | 0.1       | 0.00     |
| 547.20 | 287.5     | 2.51     |
| 553.33 | 43.6      | 0.38     |
| 556.57 | 57.4      | 0.50     |
| 558.44 | 0.1       | 0.00     |
| 565.13 | 51.6      | 0.45     |
| 569.68 | 0.0       | 0.00     |
| 574.00 | 0.0       | 0.00     |
| 575.61 | 1.7       | 0.02     |
| 581.31 | 0.3       | 0.00     |
| 582.06 | 37.1      | 0.32     |
| 584.86 | 0.0       | 0.00     |
| 587.33 | 0.0       | 0.00     |
| 593.62 | 0.0       | 0.00     |
| 595.43 | 0.0       | 0.00     |
| 596.59 | 30.8      | 0.27     |
| 598.51 | 0.0       | 0.00     |
| 605.14 | 13.9      | 0.12     |
| 610.27 | 43.6      | 0.38     |
| 611.11 | 1.2       | 0.01     |
| 621.25 | 0.2       | 0.00     |
| 626.44 | 0.0       | 0.00     |
| 630.44 | 1.8       | 0.02     |
| 632.22 | 0.0       | 0.00     |
| 634.02 | 11.6      | 0.10     |
| 638.37 | 0.1       | 0.00     |
| 640.45 | 0.0       | 0.00     |
| 642.20 | 264.5     | 2.31     |
| 642.92 | 0.0       | 0.00     |
| 647.62 | 48.4      | 0.42     |
| 653.55 | 0.2       | 0.00     |
| 655.40 | 0.0       | 0.00     |
| 660.38 | 317.3     | 2.77     |
| 661.31 | 0.0       | 0.00     |
| 662.39 | 0.0       | 0.00     |
| 664.65 | 51.2      | 0.45     |
| 675.26 | 2.1       | 0.02     |
| 681.39 | 0.2       | 0.00     |
| 688.59 | 27.8      | 0.24     |
| 696.12 | 0.0       | 0.00     |
| 707.21 | 0.0       | 0.00     |
| 710.08 | 0.2       | 0.00     |
| 712.55 | 0.1       | 0.00     |
| 713.19 | 0.4       | 0.00     |
| 715.22 | 0.2       | 0.00     |
| 718.15 | 0.0       | 0.00     |
| 721.93 | 0.1       | 0.00     |
| 723.75 | 1.4       | 0.01     |
| 730.32 | 0.1       | 0.00     |

Selwan-59#15 RT: 0.08

T: {0,0} + c EI Full ms [50.00-1000.00]

m/z= 50.00-1000.04

| m/z    | Intensity | Relative |
|--------|-----------|----------|
| 731.19 | 2.1       | 0.02     |
| 733.96 | 0.3       | 0.00     |
| 735.83 | 0.0       | 0.00     |
| 736.73 | 0.0       | 0.00     |
| 743.36 | 0.0       | 0.00     |
| 747.20 | 0.0       | 0.00     |
| 750.38 | 1.8       | 0.02     |
| 756.46 | 13.6      | 0.12     |
| 759.71 | 317.2     | 2.77     |
| 761.20 | 0.0       | 0.00     |
| 762.75 | 14.0      | 0.12     |
| 767.41 | 2.3       | 0.02     |
| 768.84 | 1.8       | 0.02     |
| 776.18 | 2.0       | 0.02     |
| 777.73 | 362.3     | 3.16     |
| 786.18 | 0.2       | 0.00     |
| 788.46 | 466.3     | 4.07     |
| 789.27 | 315.4     | 2.75     |
| 796.87 | 0.1       | 0.00     |
| 797.73 | 2.0       | 0.02     |
| 809.74 | 24.9      | 0.22     |
| 822.44 | 0.0       | 0.00     |
| 824.93 | 0.0       | 0.00     |
| 827.48 | 0.3       | 0.00     |
| 840.50 | 209.5     | 1.83     |
| 843.78 | 1.5       | 0.01     |
| 846.38 | 13.9      | 0.12     |
| 853.73 | 0.0       | 0.00     |
| 860.94 | 2.1       | 0.02     |
| 862.71 | 0.4       | 0.00     |
| 863.73 | 412.4     | 3.60     |
| 865.71 | 364.0     | 3.18     |
| 866.93 | 0.0       | 0.00     |
| 872.46 | 0.4       | 0.00     |
| 879.03 | 2.3       | 0.02     |
| 880.80 | 0.3       | 0.00     |
| 889.23 | 0.3       | 0.00     |
| 890.35 | 0.4       | 0.00     |
| 892.32 | 0.0       | 0.00     |
| 893.23 | 0.1       | 0.00     |
| 895.86 | 0.0       | 0.00     |
| 896.59 | 0.0       | 0.00     |
| 898.83 | 0.2       | 0.00     |
| 901.90 | 1.8       | 0.02     |
| 906.25 | 0.1       | 0.00     |
| 912.44 | 0.1       | 0.00     |
| 913.10 | 1.8       | 0.02     |
| 918.93 | 443.9     | 3.88     |
| 920.20 | 0.0       | 0.00     |
| 923.19 | 0.1       | 0.00     |
| 924.28 | 43.2      | 0.38     |
| 926.23 | 0.0       | 0.00     |
| 931.05 | 0.0       | 0.00     |
| 933.78 | 0.0       | 0.00     |
| 940.20 | 312.6     | 2.73     |

Selwan-59#15 RT: 0.08

T: {0,0} + c EI Full ms [50.00-1000.00]

m/z= 50.00-1000.04

| m/z    | Intensity | Relative |
|--------|-----------|----------|
| 944.94 | 0.0       | 0.00     |
| 945.49 | 0.0       | 0.00     |
| 947.71 | 0.0       | 0.00     |
| 951.44 | 353.0     | 3.08     |
| 953.58 | 0.0       | 0.00     |
| 954.85 | 0.4       | 0.00     |
| 956.12 | 0.4       | 0.00     |
| 962.05 | 0.2       | 0.00     |
| 967.69 | 1.8       | 0.02     |
| 975.71 | 0.0       | 0.00     |
| 978.69 | 411.7     | 3.59     |
| 982.13 | 0.0       | 0.00     |
| 983.48 | 0.0       | 0.00     |
| 995.90 | 0.0       | 0.00     |
| 996.70 | 13.6      | 0.12     |
| 998.27 | 1.8       | 0.02     |
