# Supplementary material for: A Simple and Efficient Multicomponent Synthesis of Novel Pyrazole, N-aminopyridine and Pyrazolo[3,4-b]Pyridine Derivatives in Water
Source: Preprints.org preprint supplement (doi:10.20944/preprints202312.1232.v1), 2023-12-28
Supplement: Supplementary file 34 [file supplementary]

RT: 0.00 - 4.18

NL:  
3.04E6  
TIC MS  
Selwan-40A

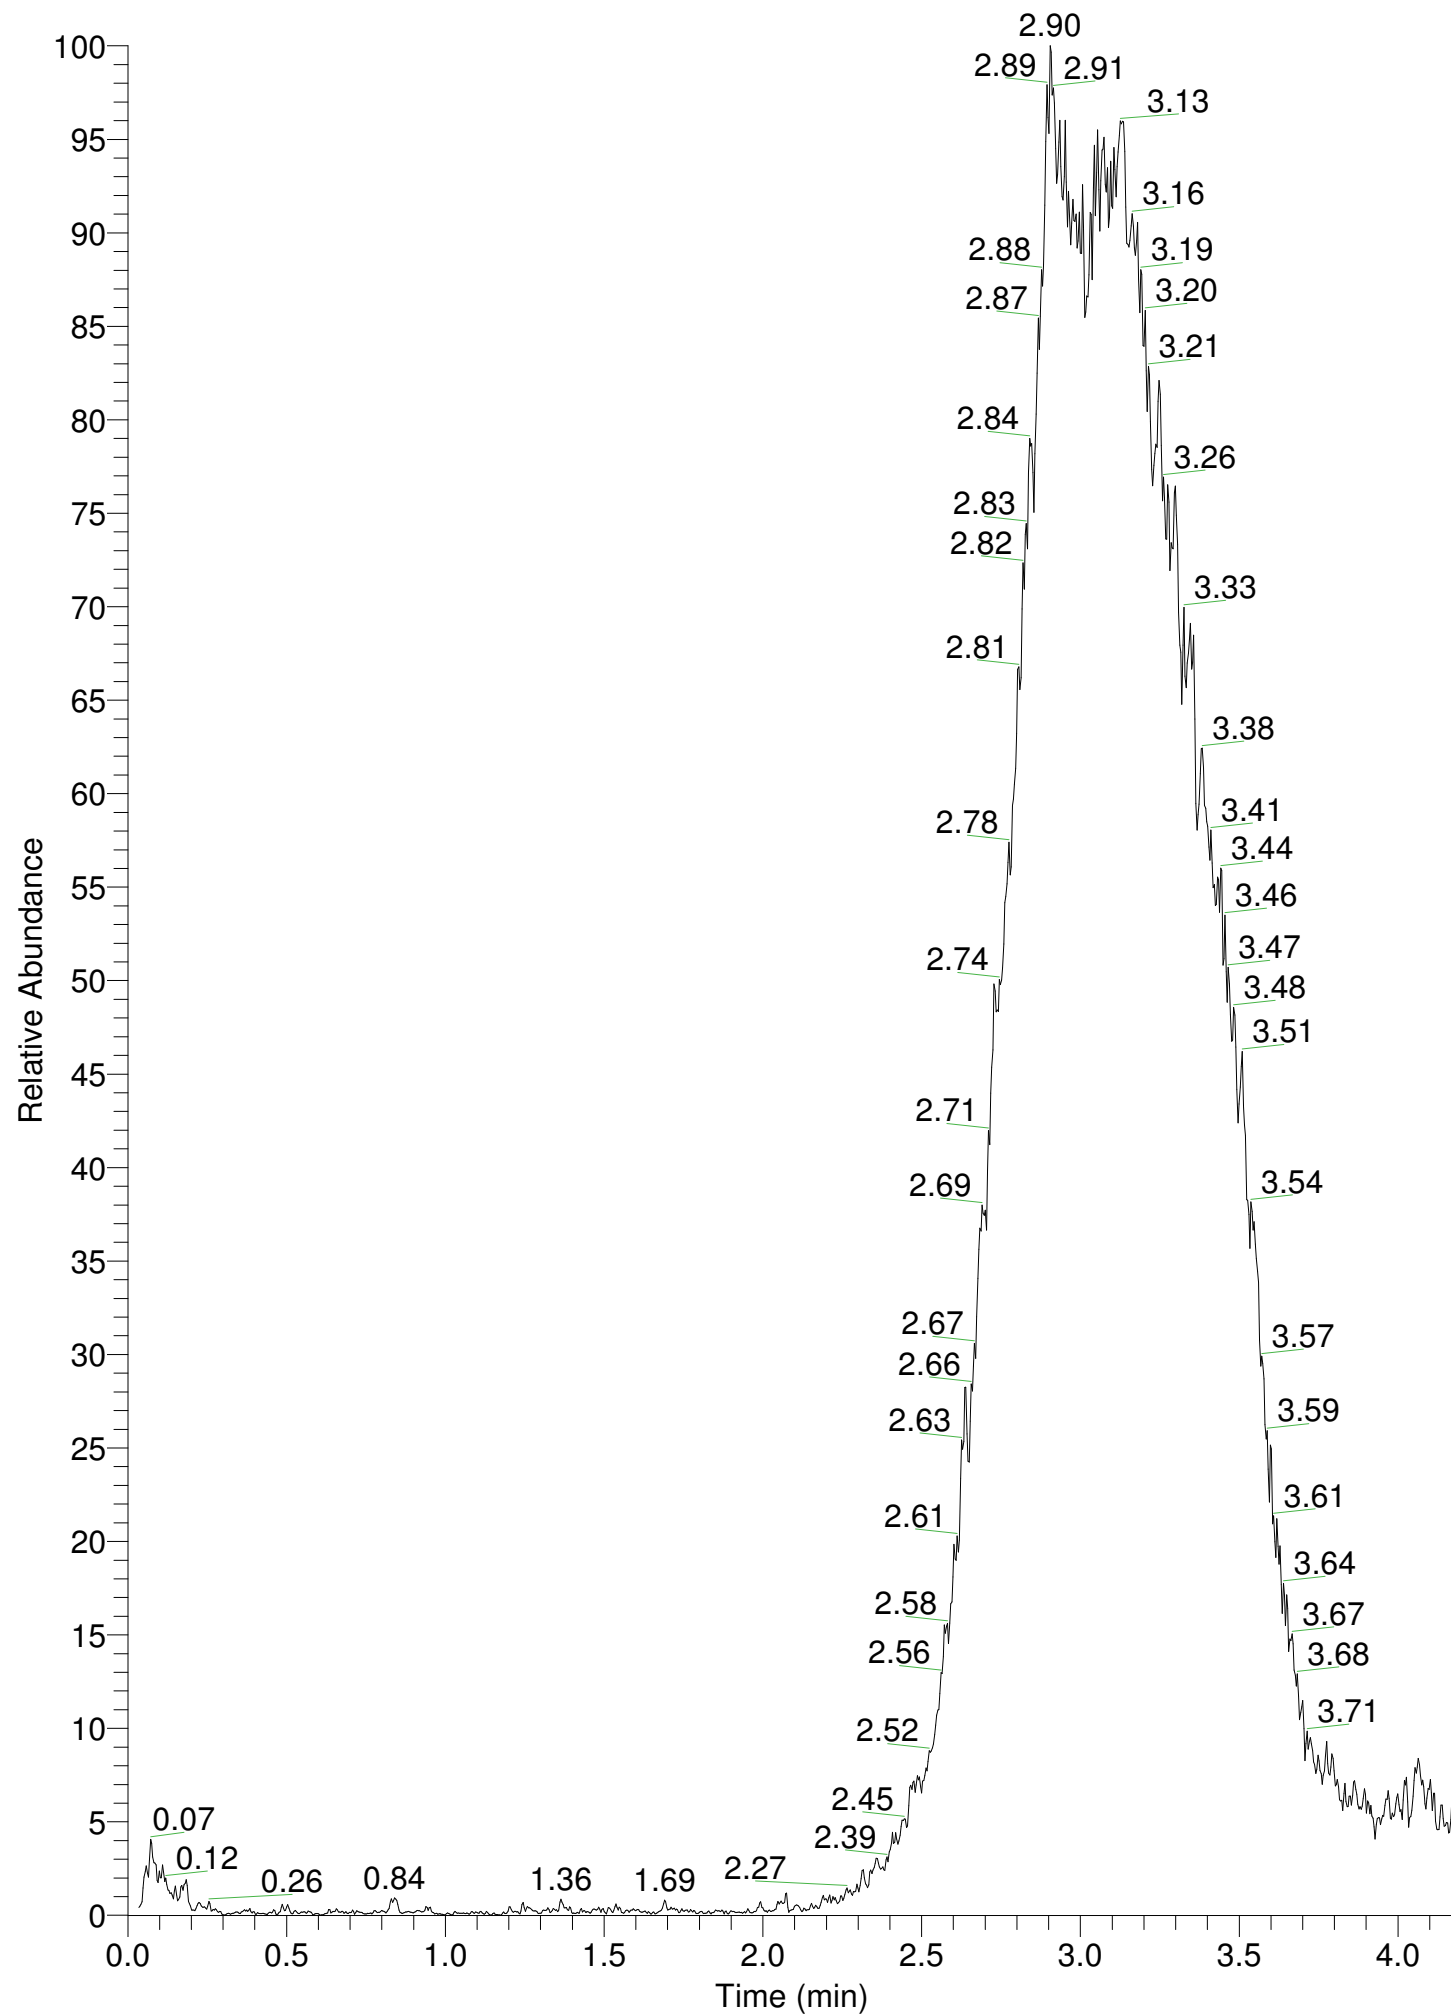

Selwan-40A #876 RT: 3.01 AV: 1 NL: 4.64E5

T: {0,0} + c EI Full ms [50.00-1000.00]

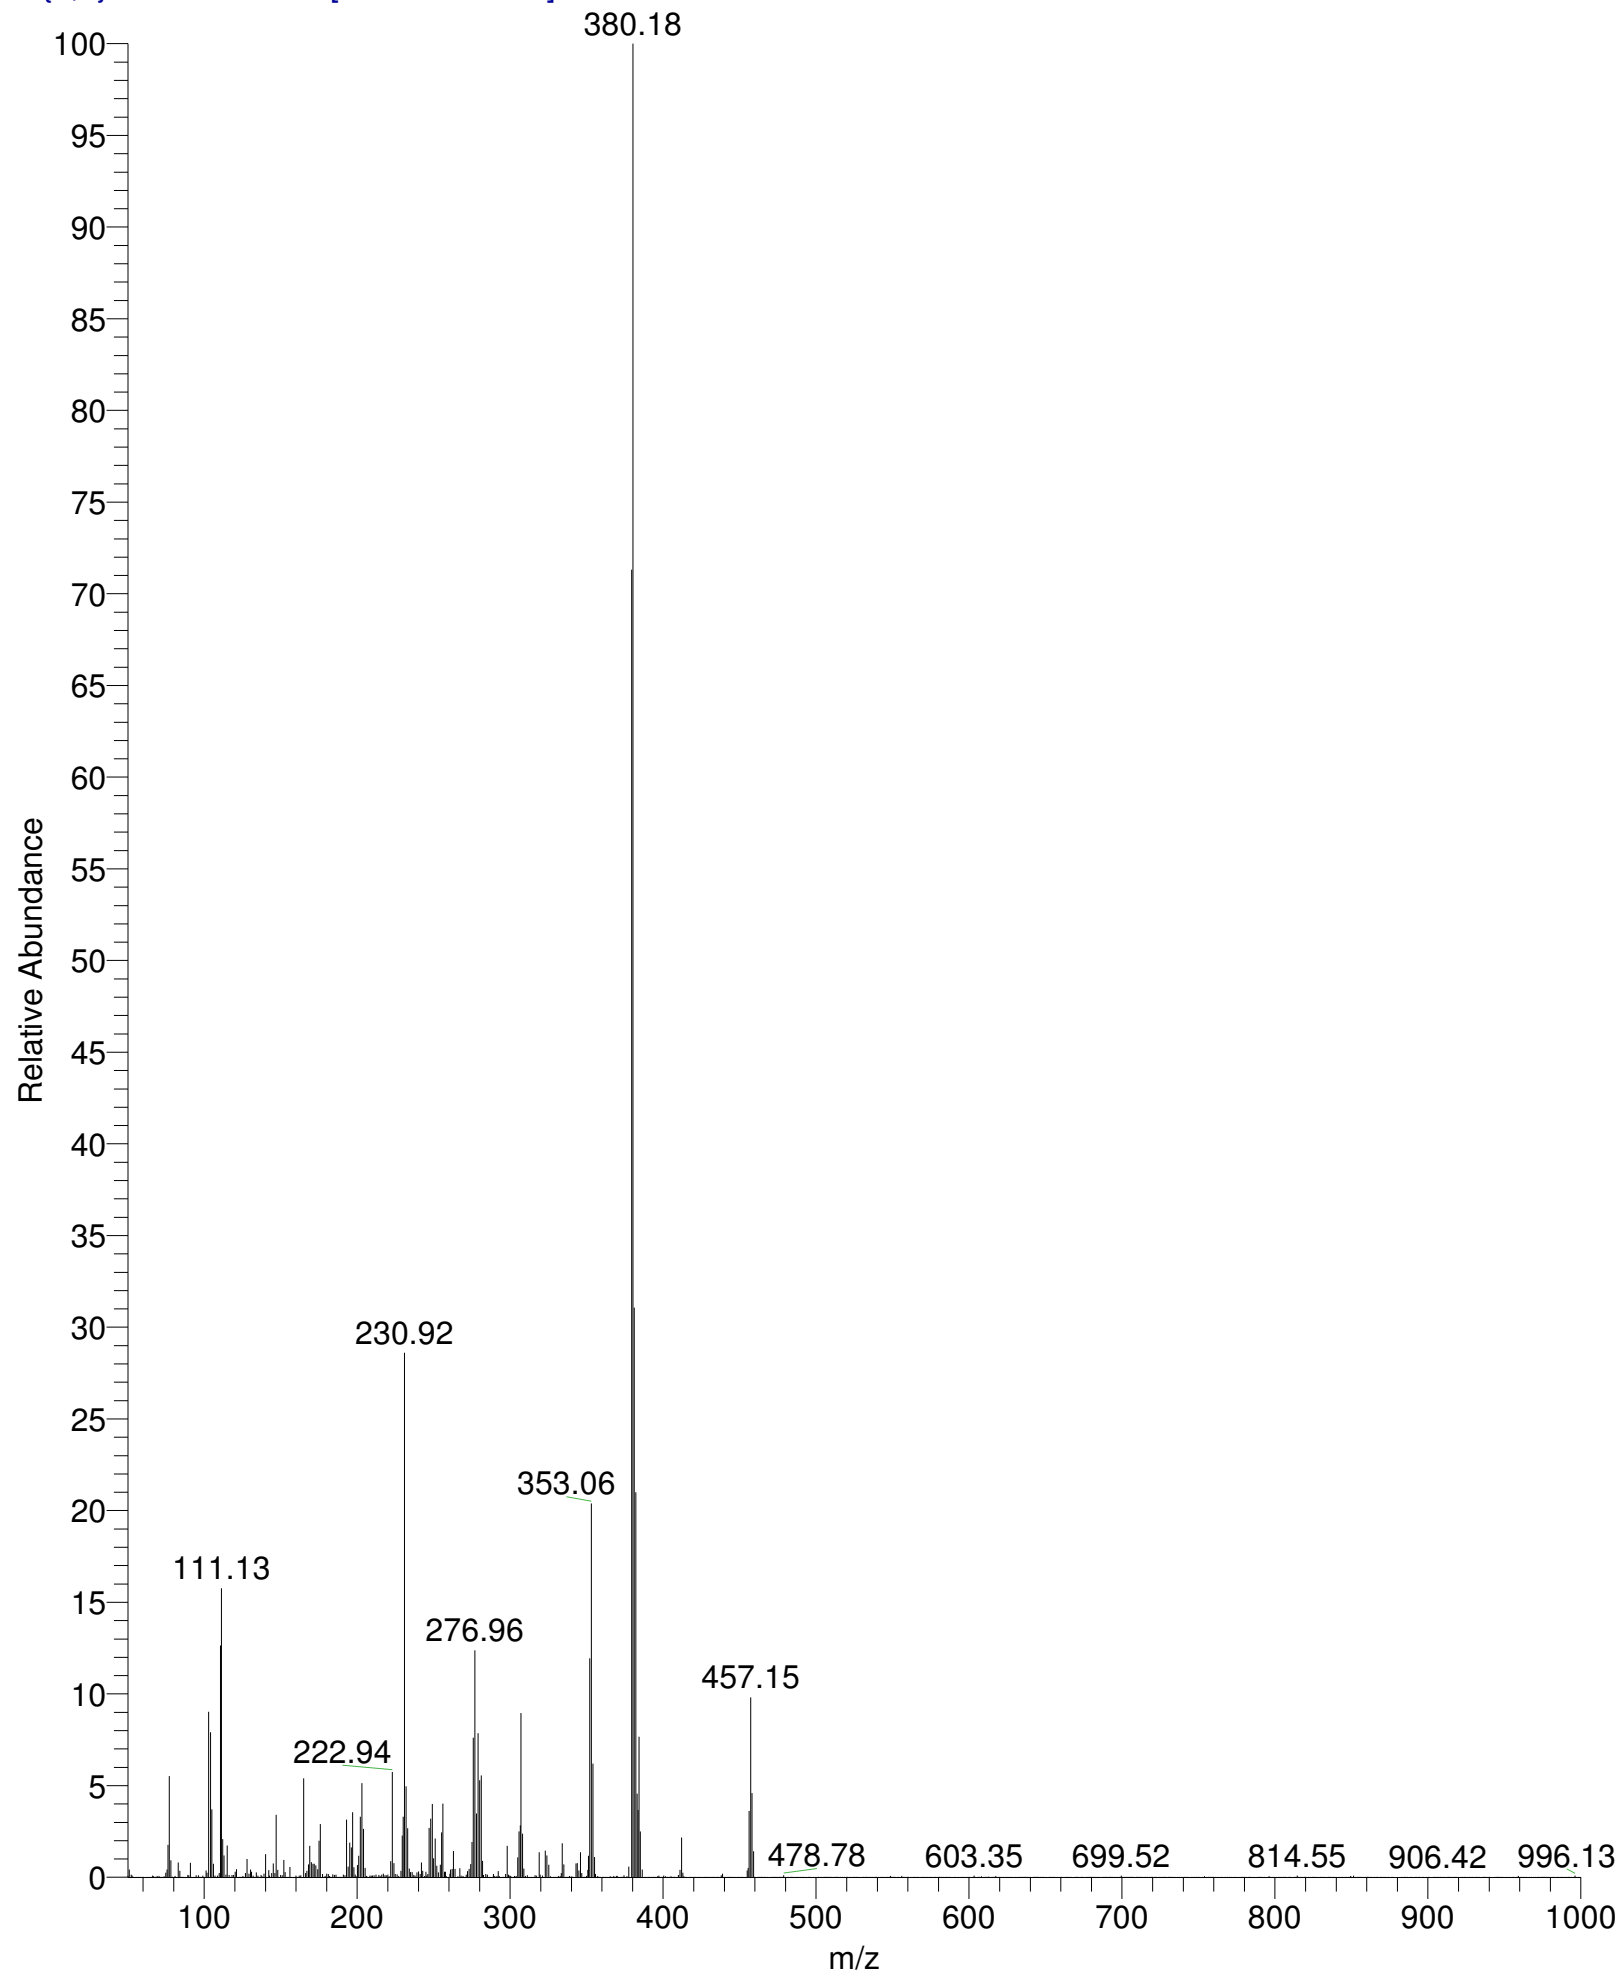

Selwan-40A#876 RT: 3.01

T: {0,0} + c EI Full ms [50.00-1000.00]

m/z= 50.00-1000.04

| m/z   | Intensity | Relative |
|-------|-----------|----------|
| 50.04 | 277.6     | 0.06     |
| 50.97 | 1925.7    | 0.42     |
| 52.18 | 574.4     | 0.12     |
| 52.84 | 376.1     | 0.08     |
| 53.38 | 0.0       | 0.00     |
| 53.88 | 40.7      | 0.01     |
| 55.36 | 0.0       | 0.00     |
| 56.25 | 0.0       | 0.00     |
| 56.92 | 1.1       | 0.00     |
| 57.83 | 0.0       | 0.00     |
| 58.44 | 0.0       | 0.00     |
| 59.45 | 0.0       | 0.00     |
| 60.17 | 0.0       | 0.00     |
| 62.26 | 0.8       | 0.00     |
| 63.22 | 0.0       | 0.00     |
| 64.29 | 12.9      | 0.00     |
| 65.34 | 0.0       | 0.00     |
| 66.24 | 375.5     | 0.08     |
| 66.85 | 189.1     | 0.04     |
| 67.65 | 0.0       | 0.00     |
| 68.15 | 0.0       | 0.00     |
| 69.13 | 266.1     | 0.06     |
| 69.68 | 0.2       | 0.00     |
| 70.35 | 313.5     | 0.07     |
| 71.36 | 0.0       | 0.00     |
| 72.02 | 0.3       | 0.00     |
| 73.08 | 1.8       | 0.00     |
| 73.84 | 225.5     | 0.05     |
| 74.83 | 1098.2    | 0.24     |
| 75.65 | 1900.4    | 0.41     |
| 76.16 | 8094.3    | 1.75     |
| 77.00 | 25554.8   | 5.51     |
| 78.14 | 4228.3    | 0.91     |
| 78.99 | 131.3     | 0.03     |
| 80.81 | 318.9     | 0.07     |
| 81.33 | 0.0       | 0.00     |
| 82.97 | 3655.6    | 0.79     |
| 83.98 | 1600.8    | 0.35     |
| 84.60 | 0.0       | 0.00     |
| 85.14 | 0.2       | 0.00     |
| 85.68 | 0.3       | 0.00     |
| 86.39 | 0.0       | 0.00     |
| 87.57 | 0.0       | 0.00     |
| 89.21 | 552.9     | 0.12     |
| 89.95 | 451.2     | 0.10     |
| 90.96 | 3620.7    | 0.78     |
| 91.84 | 0.0       | 0.00     |
| 93.11 | 0.3       | 0.00     |
| 93.94 | 0.0       | 0.00     |
| 94.58 | 413.4     | 0.09     |
| 96.03 | 430.9     | 0.09     |
| 96.82 | 0.0       | 0.00     |
| 97.37 | 0.2       | 0.00     |
| 97.91 | 0.4       | 0.00     |
| 99.12 | 324.4     | 0.07     |

Selwan-40A#876 RT: 3.01

T: {0,0} + c EI Full ms [50.00-1000.00]

m/z= 50.00-1000.04

| m/z    | Intensity | Relative |
|--------|-----------|----------|
| 100.06 | 0.3       | 0.00     |
| 101.23 | 1677.2    | 0.36     |
| 101.81 | 1065.8    | 0.23     |
| 102.90 | 41753.4   | 9.01     |
| 104.00 | 36578.3   | 7.89     |
| 105.01 | 17140.8   | 3.70     |
| 106.01 | 3360.0    | 0.72     |
| 107.10 | 380.9     | 0.08     |
| 108.15 | 29.8      | 0.01     |
| 108.75 | 330.9     | 0.07     |
| 109.65 | 971.4     | 0.21     |
| 110.60 | 58505.3   | 12.62    |
| 111.13 | 72997.0   | 15.75    |
| 111.98 | 9573.6    | 2.07     |
| 112.94 | 5420.5    | 1.17     |
| 114.04 | 640.4     | 0.14     |
| 114.98 | 7963.2    | 1.72     |
| 116.21 | 535.9     | 0.12     |
| 117.29 | 0.4       | 0.00     |
| 118.05 | 500.9     | 0.11     |
| 119.14 | 542.8     | 0.12     |
| 120.13 | 1311.1    | 0.28     |
| 121.06 | 1964.0    | 0.42     |
| 122.12 | 61.6      | 0.01     |
| 122.84 | 0.3       | 0.00     |
| 123.52 | 0.0       | 0.00     |
| 124.24 | 46.8      | 0.01     |
| 125.28 | 277.6     | 0.06     |
| 125.88 | 33.6      | 0.01     |
| 126.97 | 992.6     | 0.21     |
| 127.95 | 4548.7    | 0.98     |
| 128.61 | 48.7      | 0.01     |
| 129.27 | 810.4     | 0.17     |
| 130.19 | 1916.5    | 0.41     |
| 130.94 | 1331.7    | 0.29     |
| 131.90 | 378.8     | 0.08     |
| 132.61 | 47.5      | 0.01     |
| 133.23 | 41.4      | 0.01     |
| 134.00 | 1213.1    | 0.26     |
| 134.52 | 34.3      | 0.01     |
| 135.06 | 324.2     | 0.07     |
| 135.67 | 57.2      | 0.01     |
| 136.45 | 6.3       | 0.00     |
| 137.11 | 548.5     | 0.12     |
| 137.75 | 181.2     | 0.04     |
| 139.12 | 884.1     | 0.19     |
| 140.07 | 5798.7    | 1.25     |
| 141.45 | 79.5      | 0.02     |
| 142.07 | 1747.1    | 0.38     |
| 142.59 | 342.5     | 0.07     |
| 143.31 | 1.9       | 0.00     |
| 144.04 | 988.5     | 0.21     |
| 145.06 | 3471.7    | 0.75     |
| 146.13 | 1008.9    | 0.22     |
| 146.99 | 15700.9   | 3.39     |

Selwan-40A#876 RT: 3.01

T: {0,0} + c EI Full ms [50.00-1000.00]

m/z= 50.00-1000.04

| m/z    | Intensity | Relative |
|--------|-----------|----------|
| 148.03 | 1780.4    | 0.38     |
| 148.74 | 17.6      | 0.00     |
| 149.80 | 529.5     | 0.11     |
| 151.02 | 473.7     | 0.10     |
| 152.01 | 4317.8    | 0.93     |
| 152.90 | 1289.7    | 0.28     |
| 153.55 | 41.5      | 0.01     |
| 154.09 | 76.2      | 0.02     |
| 155.12 | 49.7      | 0.01     |
| 156.00 | 2586.0    | 0.56     |
| 156.88 | 0.8       | 0.00     |
| 158.42 | 51.7      | 0.01     |
| 159.29 | 46.6      | 0.01     |
| 159.98 | 381.3     | 0.08     |
| 160.81 | 0.0       | 0.00     |
| 161.97 | 389.9     | 0.08     |
| 162.63 | 0.0       | 0.00     |
| 163.16 | 431.0     | 0.09     |
| 164.90 | 24955.3   | 5.38     |
| 166.17 | 983.7     | 0.21     |
| 166.99 | 1581.7    | 0.34     |
| 168.06 | 3157.9    | 0.68     |
| 169.01 | 7883.3    | 1.70     |
| 170.02 | 3738.8    | 0.81     |
| 170.96 | 3369.8    | 0.73     |
| 171.96 | 3377.8    | 0.73     |
| 172.94 | 2959.1    | 0.64     |
| 174.11 | 1999.1    | 0.43     |
| 175.02 | 9186.4    | 1.98     |
| 175.93 | 13351.6   | 2.88     |
| 177.38 | 760.5     | 0.16     |
| 178.36 | 46.7      | 0.01     |
| 179.05 | 248.8     | 0.05     |
| 180.10 | 876.1     | 0.19     |
| 181.13 | 801.4     | 0.17     |
| 181.90 | 319.8     | 0.07     |
| 182.41 | 38.9      | 0.01     |
| 183.47 | 0.1       | 0.00     |
| 184.10 | 679.2     | 0.15     |
| 184.97 | 513.7     | 0.11     |
| 186.03 | 573.9     | 0.12     |
| 186.84 | 0.7       | 0.00     |
| 187.45 | 0.0       | 0.00     |
| 188.35 | 0.5       | 0.00     |
| 189.07 | 16.1      | 0.00     |
| 189.81 | 26.8      | 0.01     |
| 190.90 | 566.6     | 0.12     |
| 191.90 | 405.5     | 0.09     |
| 193.03 | 14494.9   | 3.13     |
| 194.00 | 2595.2    | 0.56     |
| 195.01 | 8695.2    | 1.88     |
| 196.07 | 7515.2    | 1.62     |
| 196.98 | 16367.2   | 3.53     |
| 197.82 | 2437.9    | 0.53     |
| 198.61 | 586.2     | 0.13     |

Selwan-40A#876 RT: 3.01

T: {0,0} + c EI Full ms [50.00-1000.00]

m/z= 50.00-1000.04

| m/z    | Intensity | Relative |
|--------|-----------|----------|
| 199.37 | 217.8     | 0.05     |
| 200.19 | 3032.6    | 0.65     |
| 201.01 | 5399.3    | 1.16     |
| 201.93 | 15262.6   | 3.29     |
| 202.97 | 23756.1   | 5.12     |
| 204.00 | 12162.7   | 2.62     |
| 205.03 | 2299.6    | 0.50     |
| 205.92 | 278.6     | 0.06     |
| 206.49 | 125.4     | 0.03     |
| 207.63 | 0.0       | 0.00     |
| 208.23 | 361.9     | 0.08     |
| 209.04 | 380.1     | 0.08     |
| 209.98 | 371.5     | 0.08     |
| 210.91 | 430.6     | 0.09     |
| 211.58 | 9.2       | 0.00     |
| 212.29 | 575.4     | 0.12     |
| 212.86 | 47.2      | 0.01     |
| 213.57 | 1.5       | 0.00     |
| 214.13 | 525.1     | 0.11     |
| 214.92 | 262.7     | 0.06     |
| 216.04 | 617.5     | 0.13     |
| 217.08 | 813.2     | 0.18     |
| 218.13 | 444.2     | 0.10     |
| 218.84 | 424.3     | 0.09     |
| 219.50 | 0.1       | 0.00     |
| 220.07 | 595.3     | 0.13     |
| 220.75 | 224.3     | 0.05     |
| 221.95 | 4023.6    | 0.87     |
| 222.94 | 26551.0   | 5.73     |
| 223.95 | 3506.5    | 0.76     |
| 224.72 | 775.2     | 0.17     |
| 225.23 | 50.0      | 0.01     |
| 226.07 | 653.5     | 0.14     |
| 227.03 | 306.0     | 0.07     |
| 228.57 | 1537.4    | 0.33     |
| 229.46 | 10483.1   | 2.26     |
| 230.04 | 15217.0   | 3.28     |
| 230.92 | 132569.2  | 28.60    |
| 231.96 | 22897.2   | 4.94     |
| 232.97 | 12324.9   | 2.66     |
| 234.07 | 2161.9    | 0.47     |
| 234.89 | 1275.0    | 0.28     |
| 235.97 | 1233.7    | 0.27     |
| 236.97 | 528.7     | 0.11     |
| 237.87 | 374.0     | 0.08     |
| 238.39 | 14.2      | 0.00     |
| 239.03 | 1158.4    | 0.25     |
| 239.98 | 1386.3    | 0.30     |
| 241.15 | 758.4     | 0.16     |
| 242.04 | 3666.7    | 0.79     |
| 242.84 | 1560.2    | 0.34     |
| 244.02 | 311.3     | 0.07     |
| 244.94 | 1316.4    | 0.28     |
| 245.53 | 326.1     | 0.07     |
| 246.22 | 773.0     | 0.17     |

Selwan-40A#876 RT: 3.01

T: {0,0} + c EI Full ms [50.00-1000.00]

m/z= 50.00-1000.04

| m/z    | Intensity | Relative |
|--------|-----------|----------|
| 247.01 | 12399.1   | 2.67     |
| 248.01 | 14756.5   | 3.18     |
| 249.00 | 18497.2   | 3.99     |
| 250.00 | 4739.3    | 1.02     |
| 250.88 | 9756.9    | 2.10     |
| 251.95 | 2902.4    | 0.63     |
| 253.05 | 1196.2    | 0.26     |
| 254.32 | 3109.9    | 0.67     |
| 255.13 | 11251.9   | 2.43     |
| 256.06 | 18545.9   | 4.00     |
| 257.02 | 1296.7    | 0.28     |
| 257.74 | 1298.1    | 0.28     |
| 258.28 | 240.3     | 0.05     |
| 259.42 | 0.5       | 0.00     |
| 260.50 | 827.5     | 0.18     |
| 261.08 | 1924.0    | 0.42     |
| 262.14 | 2070.7    | 0.45     |
| 262.95 | 6627.5    | 1.43     |
| 263.97 | 2053.9    | 0.44     |
| 265.86 | 204.0     | 0.04     |
| 266.99 | 2209.0    | 0.48     |
| 267.99 | 327.4     | 0.07     |
| 268.65 | 0.2       | 0.00     |
| 269.18 | 307.7     | 0.07     |
| 269.68 | 0.0       | 0.00     |
| 270.53 | 0.0       | 0.00     |
| 271.24 | 592.4     | 0.13     |
| 272.16 | 1501.6    | 0.32     |
| 273.03 | 2043.3    | 0.44     |
| 274.09 | 3301.2    | 0.71     |
| 274.98 | 8851.8    | 1.91     |
| 275.94 | 35248.7   | 7.60     |
| 276.96 | 57288.1   | 12.36    |
| 277.99 | 16021.1   | 3.46     |
| 278.93 | 36334.1   | 7.84     |
| 279.99 | 24478.8   | 5.28     |
| 280.99 | 25662.5   | 5.54     |
| 282.01 | 4062.0    | 0.88     |
| 282.63 | 486.9     | 0.11     |
| 283.90 | 777.6     | 0.17     |
| 284.45 | 0.0       | 0.00     |
| 285.13 | 592.1     | 0.13     |
| 286.16 | 0.1       | 0.00     |
| 286.77 | 1.6       | 0.00     |
| 288.34 | 27.6      | 0.01     |
| 288.98 | 740.9     | 0.16     |
| 289.84 | 278.2     | 0.06     |
| 290.54 | 0.0       | 0.00     |
| 291.43 | 319.0     | 0.07     |
| 292.12 | 1512.0    | 0.33     |
| 293.09 | 214.6     | 0.05     |
| 294.74 | 22.4      | 0.00     |
| 295.35 | 0.3       | 0.00     |
| 295.94 | 16.0      | 0.00     |
| 297.03 | 733.0     | 0.16     |

Selwan-40A#876 RT: 3.01

T: {0,0} + c EI Full ms [50.00-1000.00]

m/z= 50.00-1000.04

| m/z    | Intensity | Relative |
|--------|-----------|----------|
| 297.96 | 7919.9    | 1.71     |
| 298.86 | 597.6     | 0.13     |
| 299.69 | 358.7     | 0.08     |
| 300.24 | 317.9     | 0.07     |
| 301.00 | 9.2       | 0.00     |
| 301.93 | 21.3      | 0.00     |
| 302.78 | 257.6     | 0.06     |
| 303.89 | 301.0     | 0.06     |
| 304.90 | 4943.5    | 1.07     |
| 305.84 | 11521.2   | 2.49     |
| 306.53 | 13073.4   | 2.82     |
| 307.09 | 41477.1   | 8.95     |
| 308.05 | 10938.0   | 2.36     |
| 308.91 | 2162.7    | 0.47     |
| 310.03 | 261.2     | 0.06     |
| 311.28 | 462.8     | 0.10     |
| 312.17 | 0.2       | 0.00     |
| 313.43 | 10.2      | 0.00     |
| 314.06 | 0.0       | 0.00     |
| 315.31 | 0.0       | 0.00     |
| 316.24 | 426.6     | 0.09     |
| 317.08 | 370.8     | 0.08     |
| 317.74 | 1.6       | 0.00     |
| 318.96 | 6252.3    | 1.35     |
| 319.61 | 637.1     | 0.14     |
| 321.08 | 335.4     | 0.07     |
| 321.92 | 10.3      | 0.00     |
| 322.95 | 6658.6    | 1.44     |
| 324.01 | 5443.6    | 1.17     |
| 325.24 | 3154.2    | 0.68     |
| 326.18 | 226.2     | 0.05     |
| 327.05 | 33.4      | 0.01     |
| 328.37 | 0.0       | 0.00     |
| 329.24 | 0.0       | 0.00     |
| 329.85 | 0.0       | 0.00     |
| 330.61 | 0.0       | 0.00     |
| 331.26 | 0.0       | 0.00     |
| 331.80 | 300.0     | 0.06     |
| 332.69 | 204.9     | 0.04     |
| 333.40 | 978.7     | 0.21     |
| 334.06 | 8533.4    | 1.84     |
| 335.09 | 3156.5    | 0.68     |
| 336.34 | 0.2       | 0.00     |
| 336.96 | 0.0       | 0.00     |
| 337.52 | 0.0       | 0.00     |
| 338.07 | 0.0       | 0.00     |
| 338.80 | 312.2     | 0.07     |
| 339.37 | 0.1       | 0.00     |
| 340.27 | 181.6     | 0.04     |
| 341.56 | 0.0       | 0.00     |
| 343.04 | 3461.2    | 0.75     |
| 343.91 | 3523.6    | 0.76     |
| 344.98 | 1641.0    | 0.35     |
| 345.97 | 6284.6    | 1.36     |
| 346.84 | 1022.7    | 0.22     |

Selwan-40A#876 RT: 3.01

T: {0,0} + c EI Full ms [50.00-1000.00]

m/z= 50.00-1000.04

| m/z    | Intensity | Relative |
|--------|-----------|----------|
| 347.93 | 33.6      | 0.01     |
| 348.50 | 0.2       | 0.00     |
| 349.06 | 40.0      | 0.01     |
| 349.88 | 248.1     | 0.05     |
| 350.64 | 1780.1    | 0.38     |
| 351.21 | 5364.2    | 1.16     |
| 352.03 | 55292.6   | 11.93    |
| 353.06 | 94439.5   | 20.37    |
| 354.14 | 28675.6   | 6.19     |
| 355.05 | 5017.5    | 1.08     |
| 355.86 | 730.1     | 0.16     |
| 356.54 | 0.0       | 0.00     |
| 357.27 | 265.1     | 0.06     |
| 357.99 | 0.0       | 0.00     |
| 358.99 | 0.0       | 0.00     |
| 360.34 | 0.0       | 0.00     |
| 360.87 | 0.0       | 0.00     |
| 361.74 | 0.0       | 0.00     |
| 362.68 | 0.0       | 0.00     |
| 363.70 | 0.0       | 0.00     |
| 364.85 | 0.0       | 0.00     |
| 365.48 | 224.2     | 0.05     |
| 366.29 | 0.2       | 0.00     |
| 367.03 | 34.5      | 0.01     |
| 367.63 | 276.8     | 0.06     |
| 368.38 | 41.6      | 0.01     |
| 369.39 | 253.5     | 0.05     |
| 370.03 | 247.5     | 0.05     |
| 370.74 | 0.0       | 0.00     |
| 371.78 | 0.3       | 0.00     |
| 372.70 | 0.0       | 0.00     |
| 373.32 | 0.0       | 0.00     |
| 373.85 | 0.0       | 0.00     |
| 374.48 | 434.7     | 0.09     |
| 375.03 | 0.0       | 0.00     |
| 376.17 | 162.4     | 0.04     |
| 376.76 | 40.2      | 0.01     |
| 377.45 | 2607.8    | 0.56     |
| 379.38 | 330555.8  | 71.31    |
| 380.18 | 463556.9  | 100.00   |
| 381.13 | 143975.2  | 31.06    |
| 382.08 | 97261.3   | 20.98    |
| 383.03 | 21085.1   | 4.55     |
| 383.53 | 16975.3   | 3.66     |
| 384.12 | 35466.3   | 7.65     |
| 385.11 | 11490.2   | 2.48     |
| 386.24 | 1884.2    | 0.41     |
| 387.62 | 0.2       | 0.00     |
| 388.50 | 0.0       | 0.00     |
| 389.30 | 0.2       | 0.00     |
| 390.17 | 0.0       | 0.00     |
| 390.70 | 1.2       | 0.00     |
| 391.38 | 0.0       | 0.00     |
| 392.38 | 0.0       | 0.00     |
| 393.32 | 0.0       | 0.00     |

Selwan-40A#876 RT: 3.01

T: {0,0} + c EI Full ms [50.00-1000.00]

m/z= 50.00-1000.04

| m/z    | Intensity | Relative |
|--------|-----------|----------|
| 393.86 | 0.1       | 0.00     |
| 394.64 | 0.1       | 0.00     |
| 395.25 | 0.0       | 0.00     |
| 396.45 | 217.1     | 0.05     |
| 397.19 | 377.2     | 0.08     |
| 397.95 | 0.0       | 0.00     |
| 398.84 | 0.0       | 0.00     |
| 399.68 | 0.0       | 0.00     |
| 400.31 | 370.3     | 0.08     |
| 401.00 | 0.0       | 0.00     |
| 401.68 | 188.4     | 0.04     |
| 402.56 | 0.0       | 0.00     |
| 403.16 | 0.0       | 0.00     |
| 404.15 | 0.0       | 0.00     |
| 405.05 | 212.3     | 0.05     |
| 406.23 | 0.2       | 0.00     |
| 406.87 | 0.0       | 0.00     |
| 407.39 | 0.0       | 0.00     |
| 407.93 | 0.0       | 0.00     |
| 409.09 | 9.5       | 0.00     |
| 410.03 | 532.5     | 0.11     |
| 411.03 | 1797.8    | 0.39     |
| 411.99 | 9973.3    | 2.15     |
| 412.92 | 1108.7    | 0.24     |
| 413.43 | 185.5     | 0.04     |
| 414.42 | 29.2      | 0.01     |
| 415.37 | 0.0       | 0.00     |
| 417.09 | 0.0       | 0.00     |
| 417.86 | 0.0       | 0.00     |
| 418.68 | 0.4       | 0.00     |
| 419.54 | 0.0       | 0.00     |
| 420.31 | 0.0       | 0.00     |
| 421.24 | 0.0       | 0.00     |
| 422.22 | 0.0       | 0.00     |
| 423.34 | 0.0       | 0.00     |
| 424.07 | 12.3      | 0.00     |
| 425.30 | 0.0       | 0.00     |
| 426.67 | 0.0       | 0.00     |
| 427.36 | 21.0      | 0.00     |
| 427.98 | 0.0       | 0.00     |
| 428.86 | 34.1      | 0.01     |
| 429.76 | 0.0       | 0.00     |
| 430.45 | 0.0       | 0.00     |
| 431.56 | 0.0       | 0.00     |
| 432.26 | 0.0       | 0.00     |
| 432.98 | 0.0       | 0.00     |
| 433.65 | 0.0       | 0.00     |
| 434.91 | 0.0       | 0.00     |
| 435.47 | 0.0       | 0.00     |
| 436.20 | 10.3      | 0.00     |
| 437.38 | 12.3      | 0.00     |
| 437.93 | 480.4     | 0.10     |
| 438.77 | 812.5     | 0.18     |
| 439.70 | 0.0       | 0.00     |
| 440.46 | 1.8       | 0.00     |

Selwan-40A#876 RT: 3.01

T: {0,0} + c EI Full ms [50.00-1000.00]

m/z= 50.00-1000.04

| m/z    | Intensity | Relative |
|--------|-----------|----------|
| 441.14 | 0.0       | 0.00     |
| 442.20 | 0.0       | 0.00     |
| 442.87 | 0.0       | 0.00     |
| 443.56 | 0.0       | 0.00     |
| 444.29 | 0.0       | 0.00     |
| 444.84 | 0.0       | 0.00     |
| 445.95 | 0.0       | 0.00     |
| 447.09 | 0.0       | 0.00     |
| 448.46 | 0.0       | 0.00     |
| 449.29 | 0.0       | 0.00     |
| 450.49 | 0.0       | 0.00     |
| 451.46 | 0.0       | 0.00     |
| 452.23 | 0.0       | 0.00     |
| 453.75 | 1.1       | 0.00     |
| 454.84 | 1623.4    | 0.35     |
| 455.48 | 2277.3    | 0.49     |
| 456.25 | 16730.6   | 3.61     |
| 457.15 | 45416.7   | 9.80     |
| 458.16 | 21246.1   | 4.58     |
| 459.10 | 6502.6    | 1.40     |
| 459.73 | 29.4      | 0.01     |
| 460.24 | 14.8      | 0.00     |
| 461.83 | 0.2       | 0.00     |
| 462.61 | 0.0       | 0.00     |
| 463.28 | 0.0       | 0.00     |
| 464.08 | 1.2       | 0.00     |
| 464.61 | 0.0       | 0.00     |
| 465.23 | 0.0       | 0.00     |
| 466.20 | 52.7      | 0.01     |
| 466.91 | 46.6      | 0.01     |
| 468.11 | 0.0       | 0.00     |
| 470.04 | 0.0       | 0.00     |
| 471.14 | 0.0       | 0.00     |
| 471.89 | 0.0       | 0.00     |
| 472.41 | 0.0       | 0.00     |
| 473.10 | 0.0       | 0.00     |
| 473.70 | 0.0       | 0.00     |
| 474.58 | 0.0       | 0.00     |
| 475.79 | 0.0       | 0.00     |
| 476.30 | 0.0       | 0.00     |
| 476.80 | 0.0       | 0.00     |
| 477.53 | 0.0       | 0.00     |
| 478.18 | 0.0       | 0.00     |
| 478.78 | 463.3     | 0.10     |
| 479.60 | 0.0       | 0.00     |
| 481.35 | 0.0       | 0.00     |
| 482.08 | 0.0       | 0.00     |
| 483.30 | 0.0       | 0.00     |
| 483.85 | 0.0       | 0.00     |
| 484.50 | 0.0       | 0.00     |
| 485.29 | 0.0       | 0.00     |
| 486.69 | 0.2       | 0.00     |
| 487.58 | 0.0       | 0.00     |
| 488.70 | 46.3      | 0.01     |
| 489.74 | 0.0       | 0.00     |

Selwan-40A#876 RT: 3.01

T: {0,0} + c EI Full ms [50.00-1000.00]

m/z= 50.00-1000.04

| m/z    | Intensity | Relative |
|--------|-----------|----------|
| 490.83 | 0.0       | 0.00     |
| 491.79 | 0.0       | 0.00     |
| 493.29 | 0.2       | 0.00     |
| 494.91 | 0.0       | 0.00     |
| 495.68 | 0.0       | 0.00     |
| 496.32 | 0.0       | 0.00     |
| 498.53 | 0.0       | 0.00     |
| 499.93 | 0.1       | 0.00     |
| 501.15 | 0.0       | 0.00     |
| 501.66 | 0.0       | 0.00     |
| 502.54 | 0.0       | 0.00     |
| 503.56 | 0.0       | 0.00     |
| 504.98 | 0.0       | 0.00     |
| 505.52 | 0.0       | 0.00     |
| 506.07 | 0.0       | 0.00     |
| 506.63 | 0.0       | 0.00     |
| 507.23 | 0.0       | 0.00     |
| 507.82 | 0.0       | 0.00     |
| 508.59 | 0.0       | 0.00     |
| 509.35 | 0.0       | 0.00     |
| 509.89 | 0.0       | 0.00     |
| 510.96 | 0.0       | 0.00     |
| 512.28 | 0.0       | 0.00     |
| 512.83 | 0.0       | 0.00     |
| 513.36 | 0.0       | 0.00     |
| 513.96 | 0.0       | 0.00     |
| 514.86 | 0.0       | 0.00     |
| 515.88 | 0.0       | 0.00     |
| 517.28 | 0.0       | 0.00     |
| 518.54 | 0.0       | 0.00     |
| 519.92 | 0.0       | 0.00     |
| 520.48 | 0.0       | 0.00     |
| 521.81 | 0.0       | 0.00     |
| 523.28 | 0.0       | 0.00     |
| 524.67 | 0.0       | 0.00     |
| 525.24 | 0.0       | 0.00     |
| 526.20 | 0.0       | 0.00     |
| 527.20 | 0.0       | 0.00     |
| 528.26 | 0.0       | 0.00     |
| 530.40 | 0.0       | 0.00     |
| 531.03 | 0.2       | 0.00     |
| 532.10 | 0.0       | 0.00     |
| 532.62 | 0.0       | 0.00     |
| 533.19 | 0.0       | 0.00     |
| 533.97 | 0.0       | 0.00     |
| 534.77 | 0.0       | 0.00     |
| 535.81 | 0.0       | 0.00     |
| 536.78 | 0.0       | 0.00     |
| 537.89 | 0.0       | 0.00     |
| 538.77 | 0.0       | 0.00     |
| 539.35 | 0.0       | 0.00     |
| 541.00 | 0.0       | 0.00     |
| 542.46 | 0.0       | 0.00     |
| 542.99 | 0.0       | 0.00     |
| 544.24 | 0.0       | 0.00     |

Selwan-40A#876 RT: 3.01

T: {0,0} + c EI Full ms [50.00-1000.00]

m/z= 50.00-1000.04

| m/z    | Intensity | Relative |
|--------|-----------|----------|
| 545.75 | 0.0       | 0.00     |
| 546.50 | 0.0       | 0.00     |
| 547.31 | 0.0       | 0.00     |
| 547.95 | 0.0       | 0.00     |
| 548.65 | 319.7     | 0.07     |
| 549.43 | 0.0       | 0.00     |
| 550.36 | 0.0       | 0.00     |
| 550.95 | 0.0       | 0.00     |
| 551.68 | 0.0       | 0.00     |
| 553.50 | 0.0       | 0.00     |
| 554.24 | 0.0       | 0.00     |
| 556.03 | 247.6     | 0.05     |
| 557.03 | 0.0       | 0.00     |
| 557.62 | 0.0       | 0.00     |
| 558.43 | 0.0       | 0.00     |
| 559.33 | 0.0       | 0.00     |
| 559.91 | 0.0       | 0.00     |
| 560.46 | 0.0       | 0.00     |
| 561.99 | 0.0       | 0.00     |
| 563.46 | 0.0       | 0.00     |
| 564.20 | 0.0       | 0.00     |
| 564.86 | 0.0       | 0.00     |
| 565.94 | 0.3       | 0.00     |
| 566.70 | 0.0       | 0.00     |
| 568.68 | 0.0       | 0.00     |
| 569.78 | 0.0       | 0.00     |
| 570.55 | 0.0       | 0.00     |
| 571.58 | 0.0       | 0.00     |
| 572.79 | 0.0       | 0.00     |
| 574.04 | 0.0       | 0.00     |
| 574.77 | 0.0       | 0.00     |
| 575.94 | 0.0       | 0.00     |
| 577.44 | 0.0       | 0.00     |
| 577.95 | 0.0       | 0.00     |
| 579.26 | 0.0       | 0.00     |
| 579.95 | 0.0       | 0.00     |
| 580.57 | 0.0       | 0.00     |
| 581.57 | 0.0       | 0.00     |
| 582.16 | 0.0       | 0.00     |
| 583.18 | 0.0       | 0.00     |
| 584.41 | 0.0       | 0.00     |
| 585.11 | 0.0       | 0.00     |
| 585.90 | 0.0       | 0.00     |
| 586.79 | 0.0       | 0.00     |
| 587.87 | 0.0       | 0.00     |
| 590.15 | 0.0       | 0.00     |
| 591.07 | 0.0       | 0.00     |
| 592.95 | 0.0       | 0.00     |
| 594.60 | 0.0       | 0.00     |
| 595.66 | 0.0       | 0.00     |
| 596.62 | 0.1       | 0.00     |
| 598.10 | 0.0       | 0.00     |
| 599.13 | 0.0       | 0.00     |
| 599.97 | 0.0       | 0.00     |
| 600.54 | 27.0      | 0.01     |

Selwan-40A#876 RT: 3.01

T: {0,0} + c EI Full ms [50.00-1000.00]

m/z= 50.00-1000.04

| m/z    | Intensity | Relative |
|--------|-----------|----------|
| 601.94 | 0.0       | 0.00     |
| 603.35 | 327.3     | 0.07     |
| 603.86 | 0.0       | 0.00     |
| 605.52 | 0.0       | 0.00     |
| 606.17 | 0.0       | 0.00     |
| 606.80 | 0.0       | 0.00     |
| 608.04 | 184.2     | 0.04     |
| 609.69 | 0.0       | 0.00     |
| 610.54 | 0.0       | 0.00     |
| 611.22 | 0.0       | 0.00     |
| 611.75 | 0.1       | 0.00     |
| 612.80 | 159.4     | 0.03     |
| 614.86 | 0.0       | 0.00     |
| 615.41 | 0.0       | 0.00     |
| 616.09 | 0.0       | 0.00     |
| 616.68 | 0.0       | 0.00     |
| 617.54 | 310.1     | 0.07     |
| 618.86 | 0.0       | 0.00     |
| 619.55 | 0.0       | 0.00     |
| 620.11 | 0.0       | 0.00     |
| 621.11 | 0.3       | 0.00     |
| 622.46 | 0.0       | 0.00     |
| 623.53 | 0.0       | 0.00     |
| 624.74 | 0.0       | 0.00     |
| 625.63 | 0.0       | 0.00     |
| 626.89 | 0.0       | 0.00     |
| 627.97 | 0.0       | 0.00     |
| 630.06 | 0.0       | 0.00     |
| 631.47 | 0.0       | 0.00     |
| 632.81 | 0.0       | 0.00     |
| 633.66 | 0.0       | 0.00     |
| 634.48 | 0.2       | 0.00     |
| 635.02 | 0.0       | 0.00     |
| 635.91 | 0.0       | 0.00     |
| 636.45 | 0.0       | 0.00     |
| 637.21 | 0.0       | 0.00     |
| 638.04 | 0.0       | 0.00     |
| 638.94 | 0.0       | 0.00     |
| 640.04 | 0.0       | 0.00     |
| 641.90 | 0.0       | 0.00     |
| 642.58 | 0.1       | 0.00     |
| 643.14 | 0.0       | 0.00     |
| 643.73 | 0.0       | 0.00     |
| 644.38 | 0.0       | 0.00     |
| 645.00 | 0.0       | 0.00     |
| 645.65 | 0.0       | 0.00     |
| 646.87 | 0.0       | 0.00     |
| 647.82 | 0.0       | 0.00     |
| 648.76 | 0.0       | 0.00     |
| 650.22 | 0.0       | 0.00     |
| 652.41 | 0.0       | 0.00     |
| 653.17 | 0.0       | 0.00     |
| 654.09 | 0.2       | 0.00     |
| 655.23 | 0.0       | 0.00     |
| 656.04 | 0.0       | 0.00     |

Selwan-40A#876 RT: 3.01

T: {0,0} + c EI Full ms [50.00-1000.00]

m/z= 50.00-1000.04

| m/z    | Intensity | Relative |
|--------|-----------|----------|
| 657.76 | 0.0       | 0.00     |
| 659.51 | 0.0       | 0.00     |
| 660.44 | 0.0       | 0.00     |
| 661.30 | 0.0       | 0.00     |
| 662.83 | 0.0       | 0.00     |
| 663.64 | 0.0       | 0.00     |
| 664.53 | 0.0       | 0.00     |
| 665.48 | 0.0       | 0.00     |
| 666.62 | 0.0       | 0.00     |
| 669.33 | 0.0       | 0.00     |
| 669.99 | 0.0       | 0.00     |
| 670.64 | 0.0       | 0.00     |
| 671.54 | 0.0       | 0.00     |
| 673.27 | 0.0       | 0.00     |
| 673.81 | 0.0       | 0.00     |
| 674.42 | 0.0       | 0.00     |
| 676.42 | 0.0       | 0.00     |
| 677.26 | 0.0       | 0.00     |
| 678.22 | 0.0       | 0.00     |
| 678.75 | 0.0       | 0.00     |
| 679.36 | 0.0       | 0.00     |
| 679.90 | 0.0       | 0.00     |
| 680.44 | 0.0       | 0.00     |
| 680.99 | 0.0       | 0.00     |
| 682.15 | 0.0       | 0.00     |
| 682.90 | 0.0       | 0.00     |
| 684.24 | 0.0       | 0.00     |
| 685.11 | 0.0       | 0.00     |
| 687.12 | 0.0       | 0.00     |
| 687.95 | 0.0       | 0.00     |
| 688.75 | 0.0       | 0.00     |
| 689.46 | 0.0       | 0.00     |
| 690.18 | 0.0       | 0.00     |
| 691.27 | 1.5       | 0.00     |
| 691.98 | 0.0       | 0.00     |
| 692.56 | 0.0       | 0.00     |
| 693.19 | 0.0       | 0.00     |
| 693.85 | 0.0       | 0.00     |
| 694.85 | 0.0       | 0.00     |
| 696.07 | 0.0       | 0.00     |
| 696.95 | 0.0       | 0.00     |
| 698.28 | 0.0       | 0.00     |
| 698.93 | 0.0       | 0.00     |
| 699.52 | 324.8     | 0.07     |
| 700.17 | 0.0       | 0.00     |
| 700.70 | 0.0       | 0.00     |
| 701.47 | 0.0       | 0.00     |
| 702.03 | 0.0       | 0.00     |
| 702.85 | 0.0       | 0.00     |
| 703.58 | 0.0       | 0.00     |
| 704.33 | 0.0       | 0.00     |
| 705.12 | 0.0       | 0.00     |
| 705.64 | 0.0       | 0.00     |
| 706.22 | 0.0       | 0.00     |
| 707.09 | 0.0       | 0.00     |

Selwan-40A#876 RT: 3.01

T: {0,0} + c EI Full ms [50.00-1000.00]

m/z= 50.00-1000.04

| m/z    | Intensity | Relative |
|--------|-----------|----------|
| 707.73 | 0.0       | 0.00     |
| 709.26 | 0.0       | 0.00     |
| 710.01 | 0.0       | 0.00     |
| 710.57 | 0.0       | 0.00     |
| 711.41 | 0.0       | 0.00     |
| 712.14 | 0.0       | 0.00     |
| 712.70 | 0.1       | 0.00     |
| 713.63 | 0.0       | 0.00     |
| 715.06 | 0.0       | 0.00     |
| 715.63 | 0.0       | 0.00     |
| 716.57 | 0.0       | 0.00     |
| 718.10 | 0.0       | 0.00     |
| 718.97 | 0.0       | 0.00     |
| 719.47 | 0.0       | 0.00     |
| 720.09 | 0.0       | 0.00     |
| 721.05 | 0.0       | 0.00     |
| 721.96 | 0.0       | 0.00     |
| 722.70 | 0.0       | 0.00     |
| 724.12 | 0.0       | 0.00     |
| 725.38 | 0.0       | 0.00     |
| 726.19 | 0.0       | 0.00     |
| 727.27 | 0.0       | 0.00     |
| 727.98 | 0.0       | 0.00     |
| 728.66 | 0.1       | 0.00     |
| 730.20 | 0.0       | 0.00     |
| 731.06 | 0.0       | 0.00     |
| 731.78 | 0.0       | 0.00     |
| 732.58 | 0.0       | 0.00     |
| 733.46 | 0.0       | 0.00     |
| 734.75 | 0.0       | 0.00     |
| 736.34 | 0.0       | 0.00     |
| 737.56 | 0.0       | 0.00     |
| 739.02 | 0.0       | 0.00     |
| 740.42 | 0.0       | 0.00     |
| 741.17 | 0.0       | 0.00     |
| 742.11 | 0.0       | 0.00     |
| 743.17 | 0.0       | 0.00     |
| 745.38 | 0.0       | 0.00     |
| 746.44 | 0.0       | 0.00     |
| 747.49 | 0.0       | 0.00     |
| 748.73 | 0.0       | 0.00     |
| 749.58 | 0.0       | 0.00     |
| 750.26 | 0.0       | 0.00     |
| 752.36 | 0.0       | 0.00     |
| 753.92 | 187.4     | 0.04     |
| 755.41 | 0.0       | 0.00     |
| 756.39 | 0.0       | 0.00     |
| 757.20 | 0.0       | 0.00     |
| 757.98 | 0.0       | 0.00     |
| 758.65 | 0.0       | 0.00     |
| 759.27 | 0.0       | 0.00     |
| 759.77 | 0.4       | 0.00     |
| 760.98 | 0.0       | 0.00     |
| 762.55 | 0.0       | 0.00     |
| 764.51 | 0.0       | 0.00     |

Selwan-40A#876 RT: 3.01

T: {0,0} + c EI Full ms [50.00-1000.00]

m/z= 50.00-1000.04

| m/z    | Intensity | Relative |
|--------|-----------|----------|
| 765.42 | 0.0       | 0.00     |
| 767.59 | 0.0       | 0.00     |
| 768.77 | 0.0       | 0.00     |
| 770.14 | 0.0       | 0.00     |
| 771.51 | 0.0       | 0.00     |
| 773.18 | 0.0       | 0.00     |
| 774.44 | 0.0       | 0.00     |
| 776.19 | 0.0       | 0.00     |
| 777.80 | 0.0       | 0.00     |
| 778.68 | 0.0       | 0.00     |
| 779.37 | 0.0       | 0.00     |
| 780.12 | 0.0       | 0.00     |
| 781.20 | 0.0       | 0.00     |
| 782.53 | 0.0       | 0.00     |
| 783.44 | 0.0       | 0.00     |
| 784.10 | 0.0       | 0.00     |
| 786.26 | 0.0       | 0.00     |
| 788.59 | 0.0       | 0.00     |
| 789.61 | 0.0       | 0.00     |
| 790.23 | 0.0       | 0.00     |
| 790.87 | 0.0       | 0.00     |
| 791.99 | 0.0       | 0.00     |
| 793.52 | 0.0       | 0.00     |
| 795.46 | 0.0       | 0.00     |
| 796.15 | 175.0     | 0.04     |
| 797.23 | 0.0       | 0.00     |
| 798.36 | 0.2       | 0.00     |
| 799.49 | 0.0       | 0.00     |
| 801.07 | 49.7      | 0.01     |
| 802.46 | 0.0       | 0.00     |
| 803.37 | 0.0       | 0.00     |
| 804.26 | 0.0       | 0.00     |
| 805.64 | 0.0       | 0.00     |
| 806.50 | 0.0       | 0.00     |
| 807.03 | 0.0       | 0.00     |
| 809.01 | 0.0       | 0.00     |
| 809.67 | 0.0       | 0.00     |
| 810.27 | 0.0       | 0.00     |
| 812.52 | 0.0       | 0.00     |
| 813.33 | 5.6       | 0.00     |
| 813.87 | 0.0       | 0.00     |
| 814.55 | 377.6     | 0.08     |
| 815.41 | 0.0       | 0.00     |
| 816.42 | 0.0       | 0.00     |
| 817.08 | 0.0       | 0.00     |
| 817.90 | 0.0       | 0.00     |
| 819.27 | 0.0       | 0.00     |
| 819.79 | 0.0       | 0.00     |
| 820.35 | 0.0       | 0.00     |
| 821.90 | 0.0       | 0.00     |
| 823.24 | 0.0       | 0.00     |
| 824.35 | 0.0       | 0.00     |
| 825.09 | 0.0       | 0.00     |
| 825.96 | 0.1       | 0.00     |
| 826.66 | 0.0       | 0.00     |

Selwan-40A#876 RT: 3.01

T: {0,0} + c EI Full ms [50.00-1000.00]

m/z= 50.00-1000.04

| m/z    | Intensity | Relative |
|--------|-----------|----------|
| 828.07 | 0.0       | 0.00     |
| 829.91 | 0.0       | 0.00     |
| 830.69 | 0.0       | 0.00     |
| 831.81 | 0.0       | 0.00     |
| 832.85 | 0.0       | 0.00     |
| 834.55 | 0.1       | 0.00     |
| 835.27 | 0.0       | 0.00     |
| 835.93 | 0.0       | 0.00     |
| 836.73 | 0.0       | 0.00     |
| 838.01 | 12.8      | 0.00     |
| 838.62 | 0.0       | 0.00     |
| 839.89 | 0.0       | 0.00     |
| 841.91 | 0.0       | 0.00     |
| 843.16 | 0.0       | 0.00     |
| 844.00 | 0.0       | 0.00     |
| 845.73 | 0.0       | 0.00     |
| 846.82 | 0.0       | 0.00     |
| 847.84 | 0.0       | 0.00     |
| 848.95 | 0.0       | 0.00     |
| 849.48 | 275.5     | 0.06     |
| 850.13 | 0.4       | 0.00     |
| 851.35 | 366.7     | 0.08     |
| 852.79 | 0.0       | 0.00     |
| 854.00 | 0.0       | 0.00     |
| 854.67 | 0.0       | 0.00     |
| 855.19 | 0.0       | 0.00     |
| 856.03 | 47.0      | 0.01     |
| 856.91 | 0.0       | 0.00     |
| 858.09 | 0.0       | 0.00     |
| 859.25 | 0.0       | 0.00     |
| 860.10 | 0.0       | 0.00     |
| 860.69 | 0.0       | 0.00     |
| 861.31 | 0.0       | 0.00     |
| 862.20 | 0.0       | 0.00     |
| 863.37 | 0.0       | 0.00     |
| 864.89 | 0.0       | 0.00     |
| 866.31 | 0.0       | 0.00     |
| 867.03 | 0.0       | 0.00     |
| 868.91 | 0.0       | 0.00     |
| 869.68 | 0.0       | 0.00     |
| 870.66 | 0.0       | 0.00     |
| 871.53 | 0.0       | 0.00     |
| 872.53 | 0.0       | 0.00     |
| 874.29 | 0.0       | 0.00     |
| 876.23 | 0.0       | 0.00     |
| 877.21 | 0.0       | 0.00     |
| 883.08 | 0.0       | 0.00     |
| 884.48 | 0.0       | 0.00     |
| 885.35 | 0.0       | 0.00     |
| 886.61 | 0.0       | 0.00     |
| 888.85 | 0.0       | 0.00     |
| 889.49 | 0.0       | 0.00     |
| 891.52 | 0.0       | 0.00     |
| 892.34 | 0.0       | 0.00     |
| 893.99 | 0.2       | 0.00     |

Selwan-40A#876 RT: 3.01

T: {0,0} + c EI Full ms [50.00-1000.00]

m/z= 50.00-1000.04

| m/z    | Intensity | Relative |
|--------|-----------|----------|
| 894.59 | 0.0       | 0.00     |
| 896.50 | 0.0       | 0.00     |
| 897.21 | 0.0       | 0.00     |
| 898.88 | 0.0       | 0.00     |
| 900.21 | 0.0       | 0.00     |
| 900.74 | 0.0       | 0.00     |
| 903.85 | 0.0       | 0.00     |
| 904.50 | 0.0       | 0.00     |
| 905.12 | 0.0       | 0.00     |
| 906.42 | 0.4       | 0.00     |
| 907.13 | 0.0       | 0.00     |
| 908.06 | 0.0       | 0.00     |
| 908.84 | 0.0       | 0.00     |
| 909.90 | 0.0       | 0.00     |
| 911.04 | 0.0       | 0.00     |
| 912.77 | 0.0       | 0.00     |
| 913.45 | 0.0       | 0.00     |
| 914.03 | 0.0       | 0.00     |
| 914.77 | 0.0       | 0.00     |
| 915.79 | 0.0       | 0.00     |
| 917.06 | 0.0       | 0.00     |
| 917.87 | 0.0       | 0.00     |
| 918.46 | 0.0       | 0.00     |
| 919.60 | 0.0       | 0.00     |
| 921.77 | 0.0       | 0.00     |
| 922.82 | 0.1       | 0.00     |
| 923.69 | 0.0       | 0.00     |
| 924.48 | 0.0       | 0.00     |
| 925.77 | 0.0       | 0.00     |
| 927.30 | 0.0       | 0.00     |
| 928.09 | 0.0       | 0.00     |
| 929.20 | 0.0       | 0.00     |
| 930.91 | 0.0       | 0.00     |
| 931.64 | 0.0       | 0.00     |
| 932.57 | 0.0       | 0.00     |
| 933.68 | 0.0       | 0.00     |
| 935.72 | 0.0       | 0.00     |
| 936.50 | 0.0       | 0.00     |
| 937.06 | 0.0       | 0.00     |
| 937.63 | 0.0       | 0.00     |
| 938.79 | 0.0       | 0.00     |
| 939.95 | 0.0       | 0.00     |
| 940.47 | 0.0       | 0.00     |
| 943.81 | 0.0       | 0.00     |
| 944.94 | 0.0       | 0.00     |
| 945.57 | 0.3       | 0.00     |
| 946.30 | 0.0       | 0.00     |
| 947.01 | 0.0       | 0.00     |
| 948.02 | 0.0       | 0.00     |
| 948.96 | 0.0       | 0.00     |
| 950.71 | 0.0       | 0.00     |
| 952.46 | 0.0       | 0.00     |
| 953.68 | 0.0       | 0.00     |
| 955.58 | 0.0       | 0.00     |
| 956.18 | 0.0       | 0.00     |

Selwan-40A#876 RT: 3.01

T: {0,0} + c EI Full ms [50.00-1000.00]

m/z= 50.00-1000.04

| m/z    | Intensity | Relative |
|--------|-----------|----------|
| 957.84 | 0.0       | 0.00     |
| 958.47 | 0.0       | 0.00     |
| 959.21 | 257.2     | 0.06     |
| 960.59 | 0.0       | 0.00     |
| 961.53 | 0.0       | 0.00     |
| 962.37 | 0.0       | 0.00     |
| 963.33 | 0.0       | 0.00     |
| 964.34 | 0.0       | 0.00     |
| 966.35 | 0.0       | 0.00     |
| 967.77 | 0.0       | 0.00     |
| 969.22 | 0.0       | 0.00     |
| 970.44 | 0.0       | 0.00     |
| 971.82 | 0.0       | 0.00     |
| 972.39 | 0.0       | 0.00     |
| 973.44 | 0.0       | 0.00     |
| 974.11 | 0.0       | 0.00     |
| 975.11 | 0.0       | 0.00     |
| 975.66 | 0.0       | 0.00     |
| 976.26 | 0.0       | 0.00     |
| 977.20 | 0.0       | 0.00     |
| 977.86 | 0.0       | 0.00     |
| 978.90 | 0.0       | 0.00     |
| 979.80 | 0.0       | 0.00     |
| 981.18 | 0.3       | 0.00     |
| 981.79 | 0.0       | 0.00     |
| 983.06 | 0.0       | 0.00     |
| 984.59 | 0.0       | 0.00     |
| 985.21 | 0.0       | 0.00     |
| 986.54 | 0.0       | 0.00     |
| 987.49 | 0.0       | 0.00     |
| 988.23 | 0.1       | 0.00     |
| 989.59 | 0.0       | 0.00     |
| 990.76 | 0.0       | 0.00     |
| 991.76 | 0.0       | 0.00     |
| 992.37 | 0.0       | 0.00     |
| 992.97 | 0.0       | 0.00     |
| 993.81 | 0.0       | 0.00     |
| 995.18 | 0.0       | 0.00     |
| 996.13 | 374.8     | 0.08     |
| 996.84 | 0.0       | 0.00     |
| 998.54 | 0.0       | 0.00     |
| 999.26 | 0.0       | 0.00     |
