# Supplementary material for: A Simple and Efficient Multicomponent Synthesis of Novel Pyrazole, N-aminopyridine and Pyrazolo[3,4-b]Pyridine Derivatives in Water
Source: Preprints.org preprint supplement (doi:10.20944/preprints202312.1232.v1), 2023-12-28
Supplement: Supplementary file 42 [file supplementary]

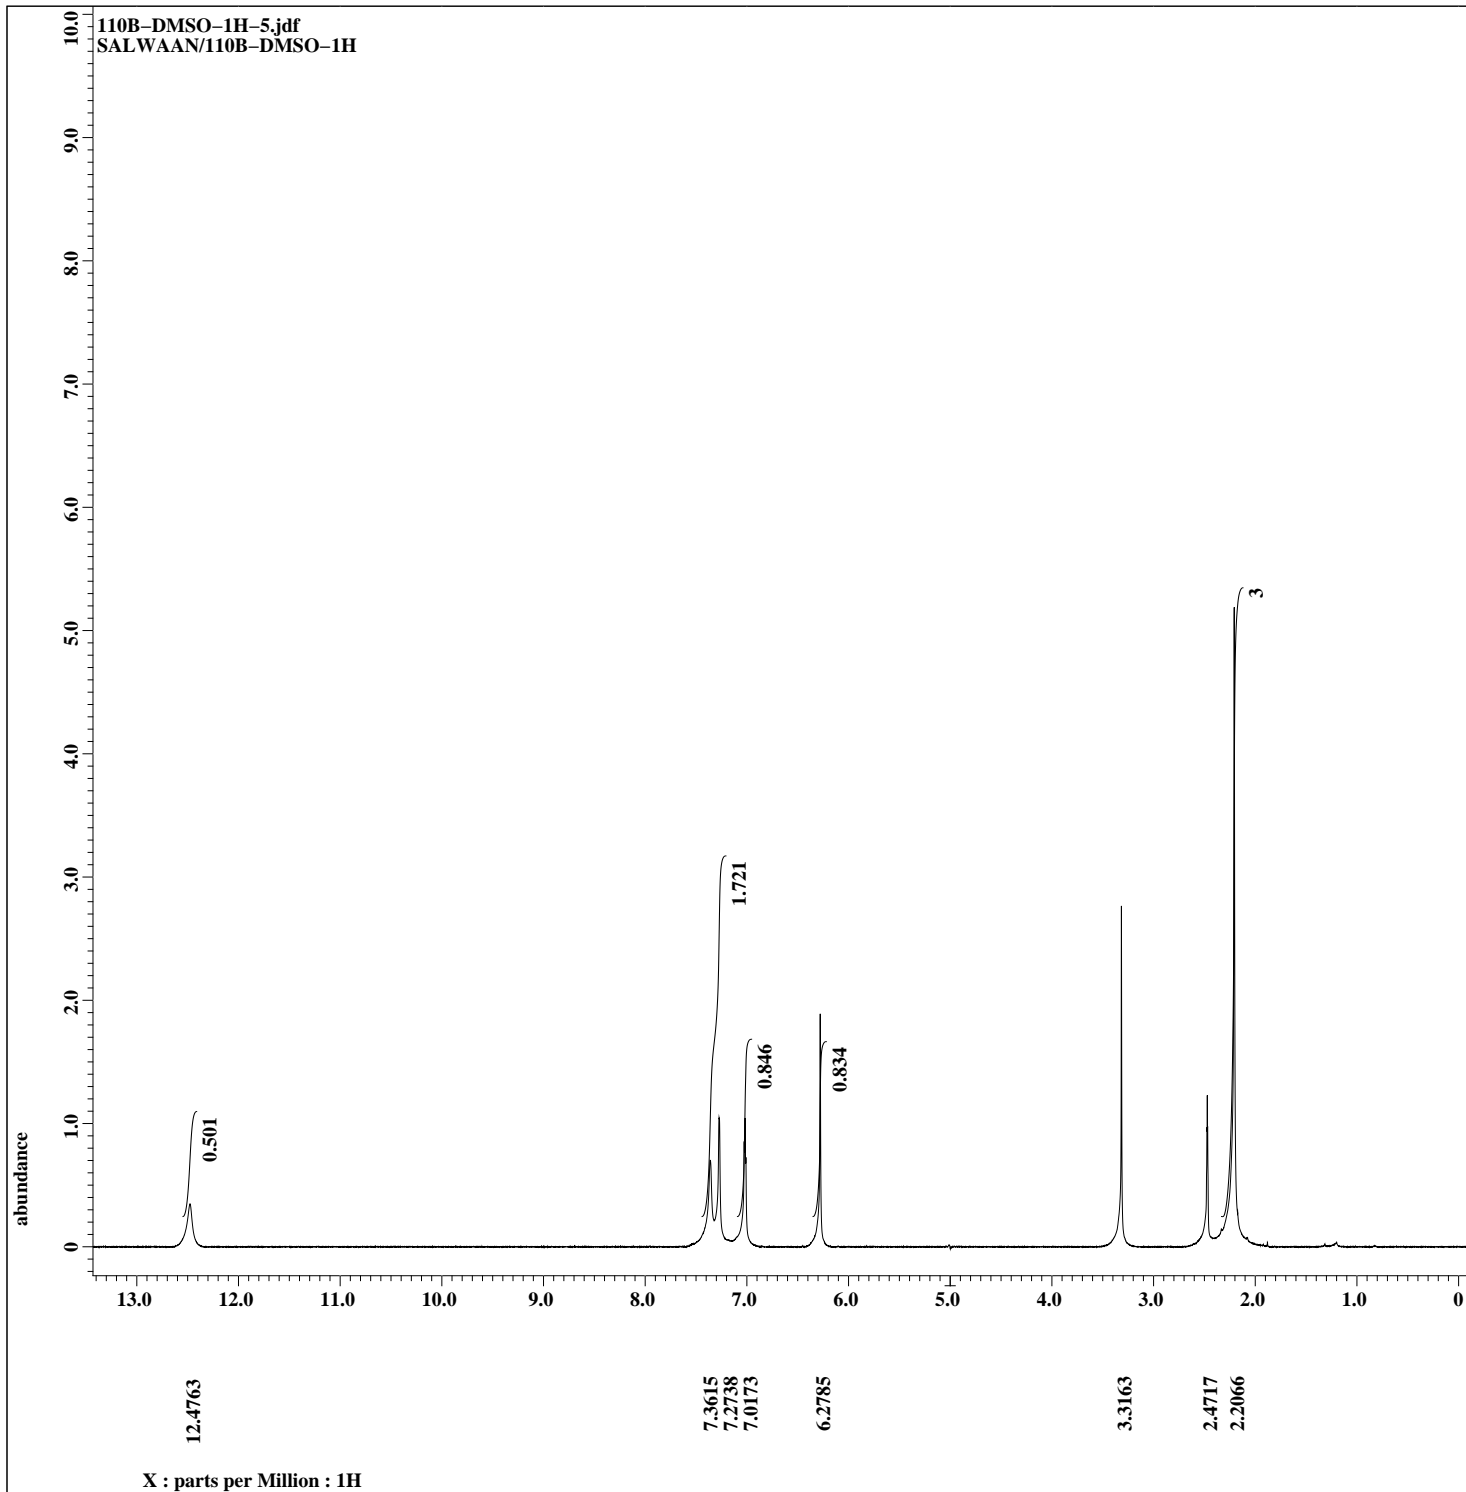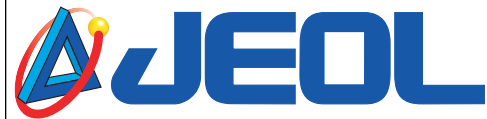

Author = delta3  
Content = SALWAAN/110B-DMS  
Creation\_time = 12-NOV-2023 18:4  
Current\_time = 12-NOV-2023 11:3  
Data\_format = 1D REAL  
Dim\_size = 26214  
Dim\_title = 1H  
Dim\_units = [ppm]  
Dimensions = X  
Filename = 110B-DMSO-1H-5.j  
Machine = scc  
Revision\_time = 12-NOV-2023 11:3  
Sample\_id = SALWAAN/110B-DMS  
Site = ECA500 (Datum BL  
Spectrometer = DELTA2\_NMR  
Scans = 22  
Mod\_return = 1  
Total\_scans = 22  
X\_points = 32768  
X\_prescans = 1  
X\_domain = 1H  
X\_offset = 5.0[ppm]  
X\_freq = 500.15991521[MHz]  
X\_sweep = 15.625[kHz]  
X\_resolution = 0.47683716[Hz]  
Irr\_domain = 1H  
Irr\_offset = 5.0[ppm]  
Irr\_freq = 500.15991521[MHz]  
Tri\_domain = 1H  
Tri\_offset = 5.0[ppm]  
Tri\_freq = 500.15991521[MHz]  
X\_acq\_duration = 2.097152[s]  
Digital\_filter = TRUE  
Filter\_factor = 32  
Af\_version = 1  
Delay\_of\_start = 1.99999974[s]  
Actual\_start\_time = 12-NOV-2023 18:4  
Acq\_delay = 5.5[us]  
Digital\_filter\_status = 2P  
Clipped = TRUE  
Dc\_balanced = FALSE  
X90 = 10.50092[us]  
Irr90 = 10[us]  
Tri90 = 10[us]  
Qua90 = 10[us]  
Qui90 = 10[us]  
Sex90 = 10[us]  
Sep90 = 10[us]  
Oct90 = 10[us]  
Non90 = 10[us]  
Dec90 = 10[us]  
X90\_hi = 92[us]  
Irr90\_hi = 10[us]  
Tri90\_hi = 10[us]  
Qua90\_hi = 10[us]  
Qui90\_hi = 10[us]  
Sex90\_hi = 10[us]  
Sep90\_hi = 10[us]  
Oct90\_hi = 10[us]  
Non90\_hi = 10[us]  
Dec90\_hi = 10[us]  
X90\_lo = 92[us]  
Irr90\_lo = 10[us]  
Tri90\_lo = 10[us]  
Qua90\_lo = 10[us]  
Qui90\_lo = 10[us]  
Sex90\_lo = 10[us]  
Sep90\_lo = 10[us]  
Oct90\_lo = 10[us]  
Non90\_lo = 10[us]
