# Supplementary material for: A Simple and Efficient Multicomponent Synthesis of Novel Pyrazole, N-aminopyridine and Pyrazolo[3,4-b]Pyridine Derivatives in Water
Source: Preprints.org preprint supplement (doi:10.20944/preprints202312.1232.v1), 2023-12-28
Supplement: Supplementary file 45 [file supplementary]

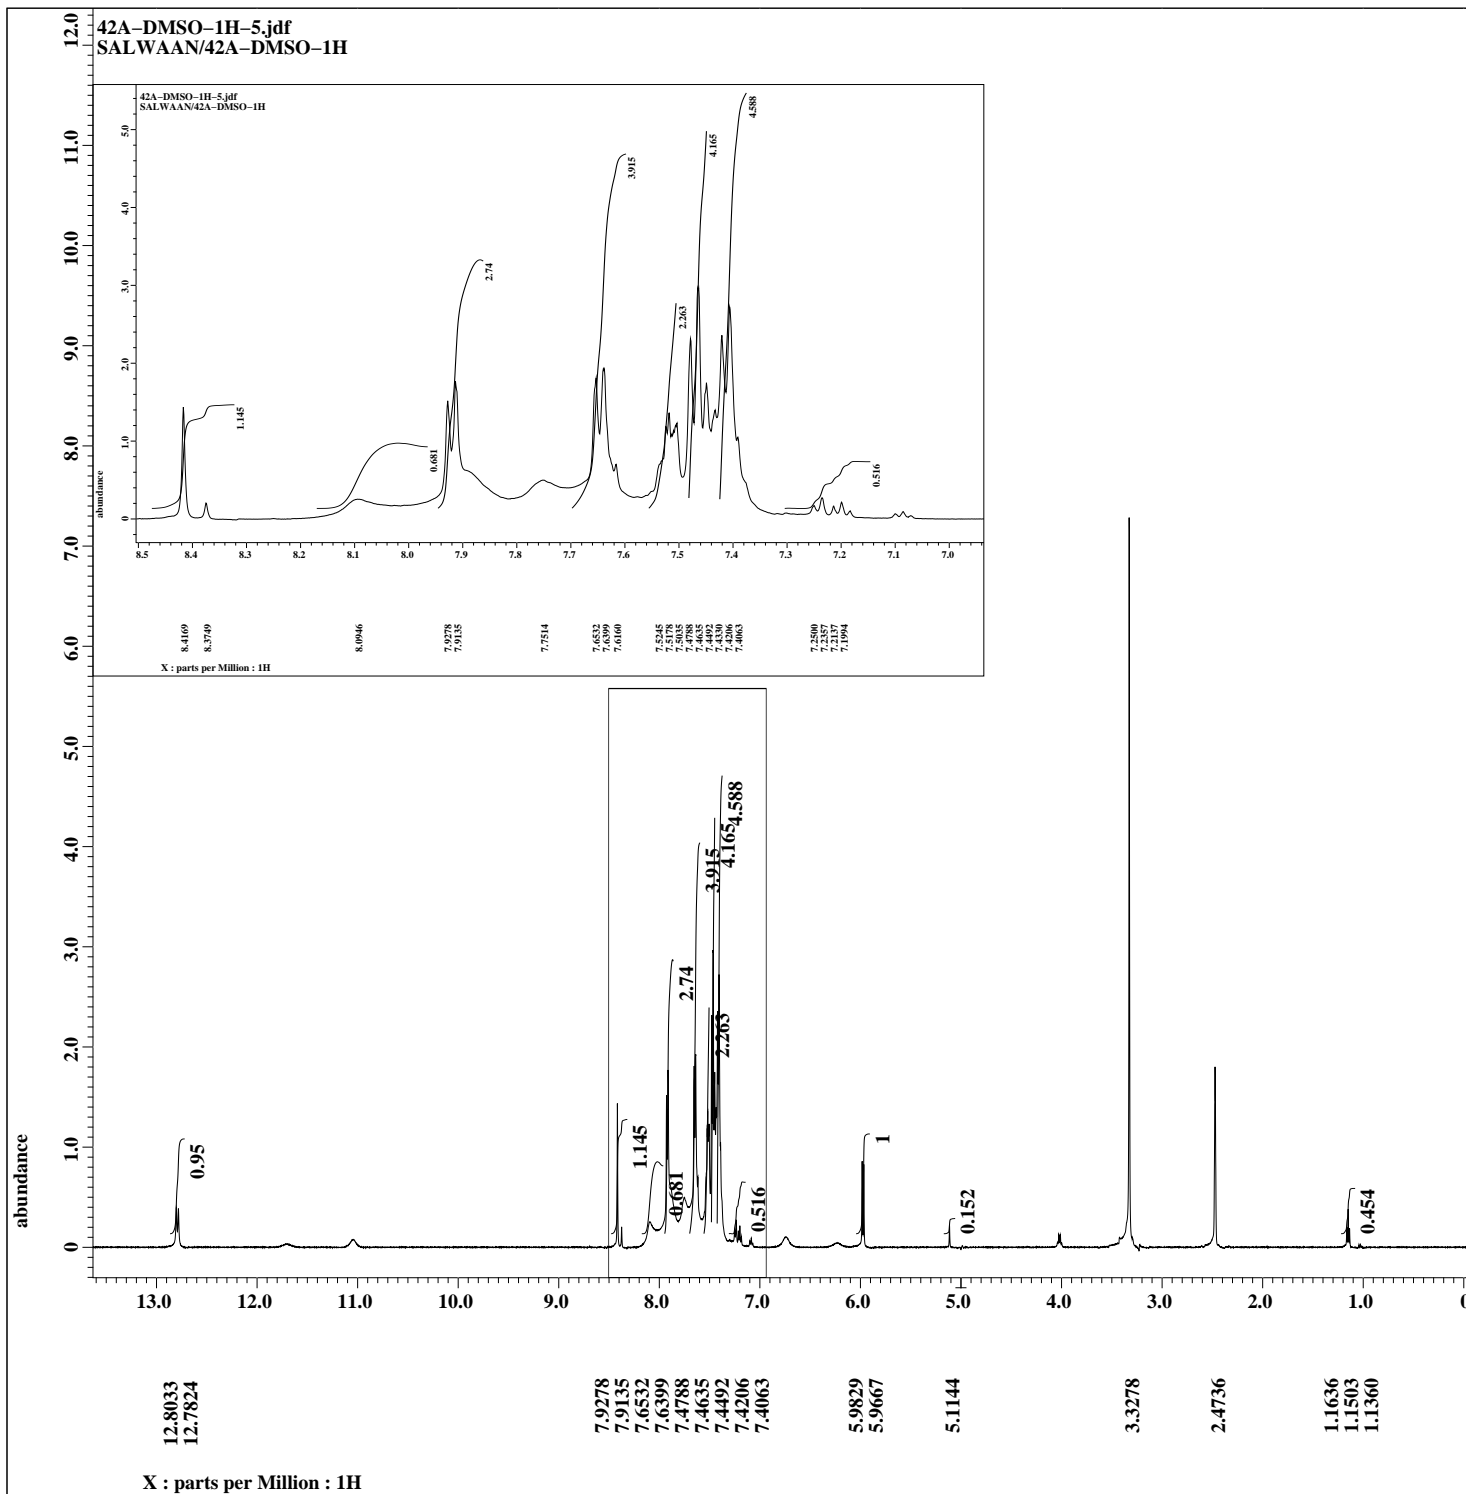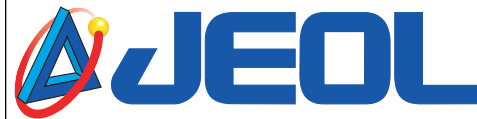

```

Author           = delta3
Content          = SALWAAN/42A-DMSO
Creation_time    = 12-NOV-2023 18:2
Current_time     = 12-NOV-2023 11:2
Data_format      = 1D_REAL
Dim_size         = 26214
Dim_title        = 1H
Dim_units        = [ppm]
Dimensions       = X
Filename         = 42A-DMSO-1H-5.jd
Machine          = scc
Revision_time    = 12-NOV-2023 11:2
Sample_id        = SALWAAN/42A-DMSO
Site             = ECA500 (Datum BL
Spectrometer     = DELTA2_NMR
Scans            = 14
Mod_return       = 1
Total_scans      = 14
X_points         = 32768
X_prescans       = 1
X_domain         = 1H
X_offset         = 5.0[ppm]
X_freq           = 500.15991521[MHz]
X_sweep          = 15.625[kHz]
X_resolution     = 0.47683716[Hz]
Irr_domain       = 1H
Irr_offset       = 5.0[ppm]
Irr_freq         = 500.15991521[MHz]
Tri_domain       = 1H
Tri_offset       = 5.0[ppm]
Tri_freq         = 500.15991521[MHz]
X_acq_duration   = 2.097152[s]
Digital_filter   = TRUE
Filter_factor    = 32
Af_version       = 1
Delay_of_start   = 1.99999974[s]
Actual_start_time = 12-NOV-2023 18:2
Acq_delay        = 5.5[us]
Digital_filter_status = 2P
Clipped          = TRUE
Dc_balanced      = FALSE
X90              = 10.50092[us]
Irr90            = 10[us]
Tri90            = 10[us]
Qua90            = 10[us]
Qui90            = 10[us]
Sex90            = 10[us]
Sep90            = 10[us]
Oct90            = 10[us]
Non90            = 10[us]
Dec90            = 10[us]
X90_hi           = 92[us]
Irr90_hi         = 10[us]
Tri90_hi         = 10[us]
Qua90_hi         = 10[us]
Qui90_hi         = 10[us]
Sex90_hi         = 10[us]
Sep90_hi         = 10[us]
Oct90_hi         = 10[us]
Non90_hi         = 10[us]
Dec90_hi         = 10[us]
X90_lo           = 92[us]
Irr90_lo         = 10[us]
Tri90_lo         = 10[us]
Qua90_lo         = 10[us]
Qui90_lo         = 10[us]
Sex90_lo         = 10[us]
Sep90_lo         = 10[us]
Oct90_lo         = 10[us]
Non90_lo         = 10[us]

```
