# Supplementary material for: A Simple and Efficient Multicomponent Synthesis of Novel Pyrazole, N-aminopyridine and Pyrazolo[3,4-b]Pyridine Derivatives in Water
Source: Preprints.org preprint supplement (doi:10.20944/preprints202312.1232.v1), 2023-12-28
Supplement: Supplementary file 52 [file supplementary]

Peak Find - 42A.jws

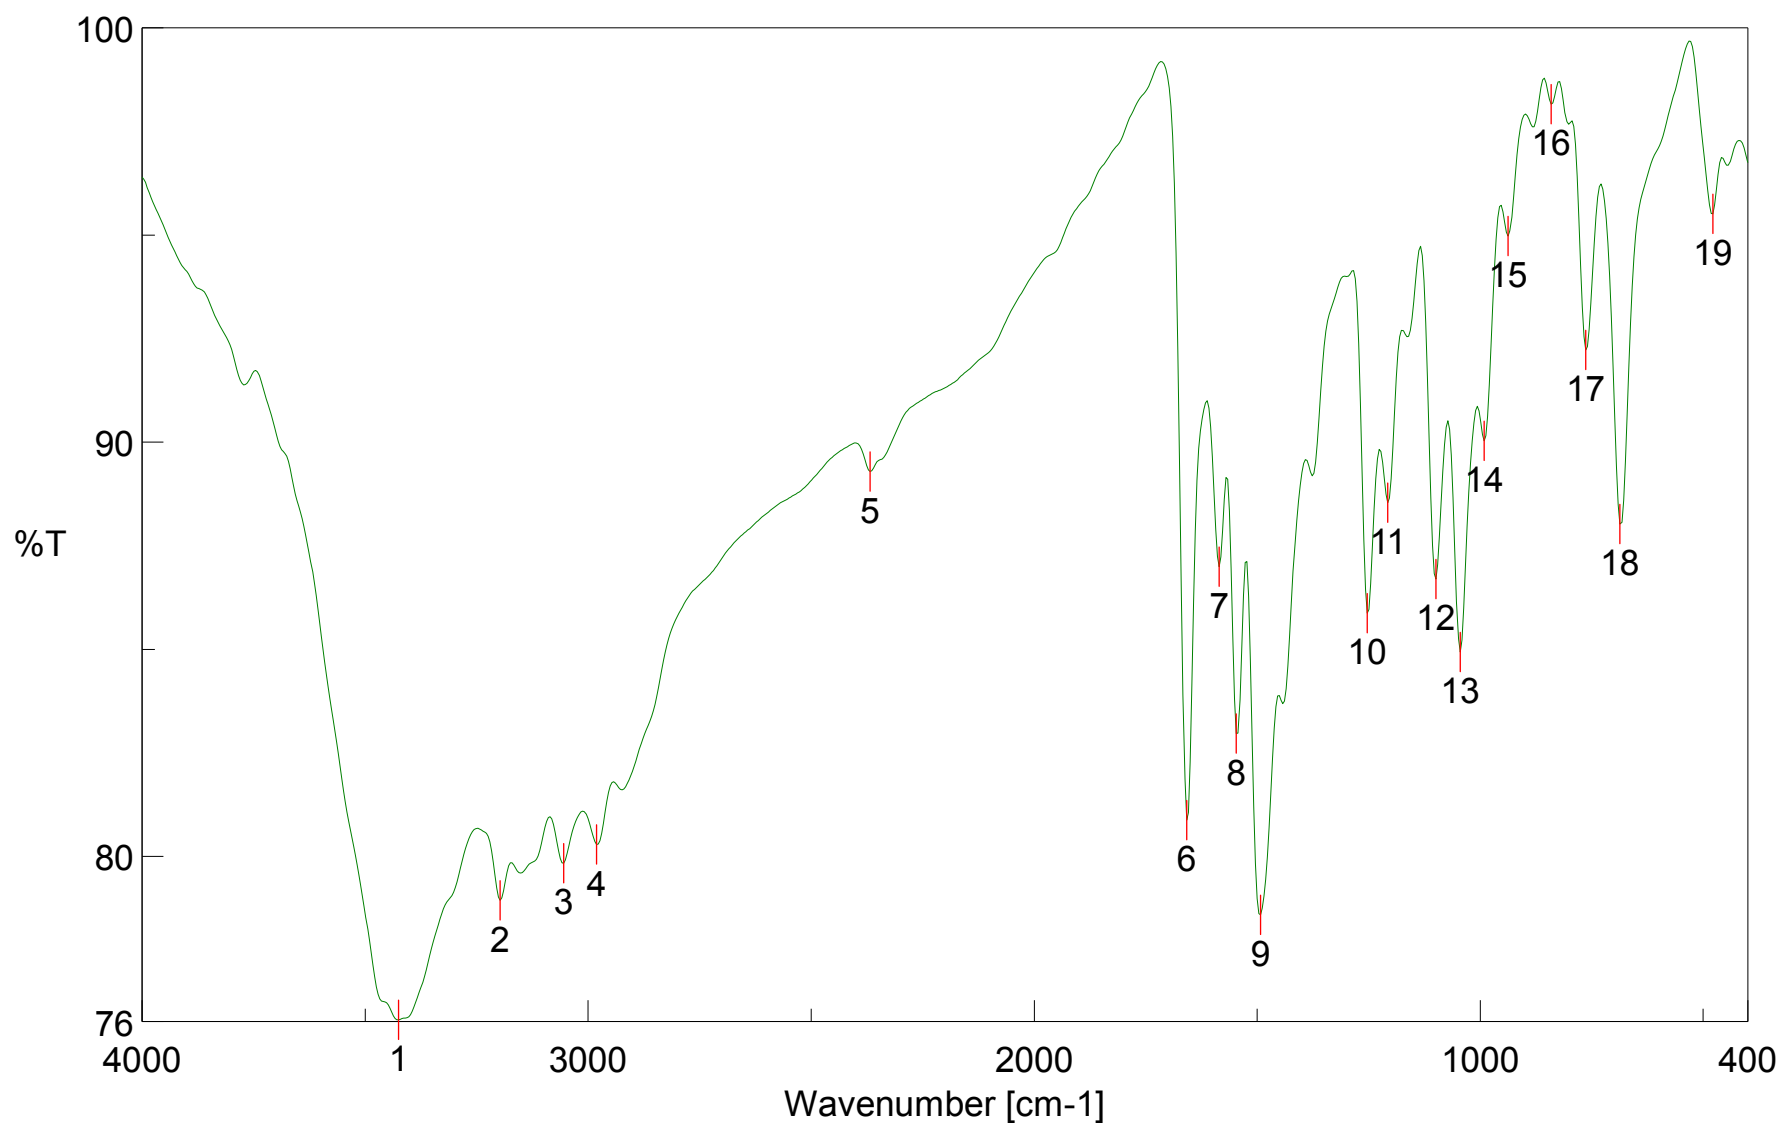

[ Result of Peak Picking ]

| No. | Position | Intensity | No. | Position | Intensity | No. | Position | Intensity |
|-----|----------|-----------|-----|----------|-----------|-----|----------|-----------|
| 1   | 3424.96  | 76.0394   | 2   | 3197.4   | 78.9286   | 3   | 3054.69  | 79.8234   |
| 4   | 2981.41  | 80.2816   | 5   | 2368.16  | 89.2829   | 6   | 1658.48  | 80.8621   |
| 7   | 1585.2   | 86.9862   | 8   | 1546.63  | 82.9555   | 9   | 1492.63  | 78.5768   |
| 10  | 1253.5   | 85.8644   | 11  | 1207.22  | 88.5303   | 12  | 1099.23  | 86.6886   |
| 13  | 1045.23  | 84.9207   | 14  | 991.232  | 90.0235   | 15  | 937.235  | 94.974    |
| 16  | 840.812  | 98.1536   | 17  | 763.673  | 92.2245   | 18  | 686.534  | 88.013    |
| 19  | 478.26   | 95.5115   |     |          |           |     |          |           |
