# Supplementary material for: A Simple and Efficient Multicomponent Synthesis of Novel Pyrazole, N-aminopyridine and Pyrazolo[3,4-b]Pyridine Derivatives in Water
Source: Preprints.org preprint supplement (doi:10.20944/preprints202312.1232.v1), 2023-12-28
Supplement: Supplementary file 54 [file supplementary]

RT: 0.00 - 4.20

NL:  
1.14E7  
TIC MS  
Hayam-128

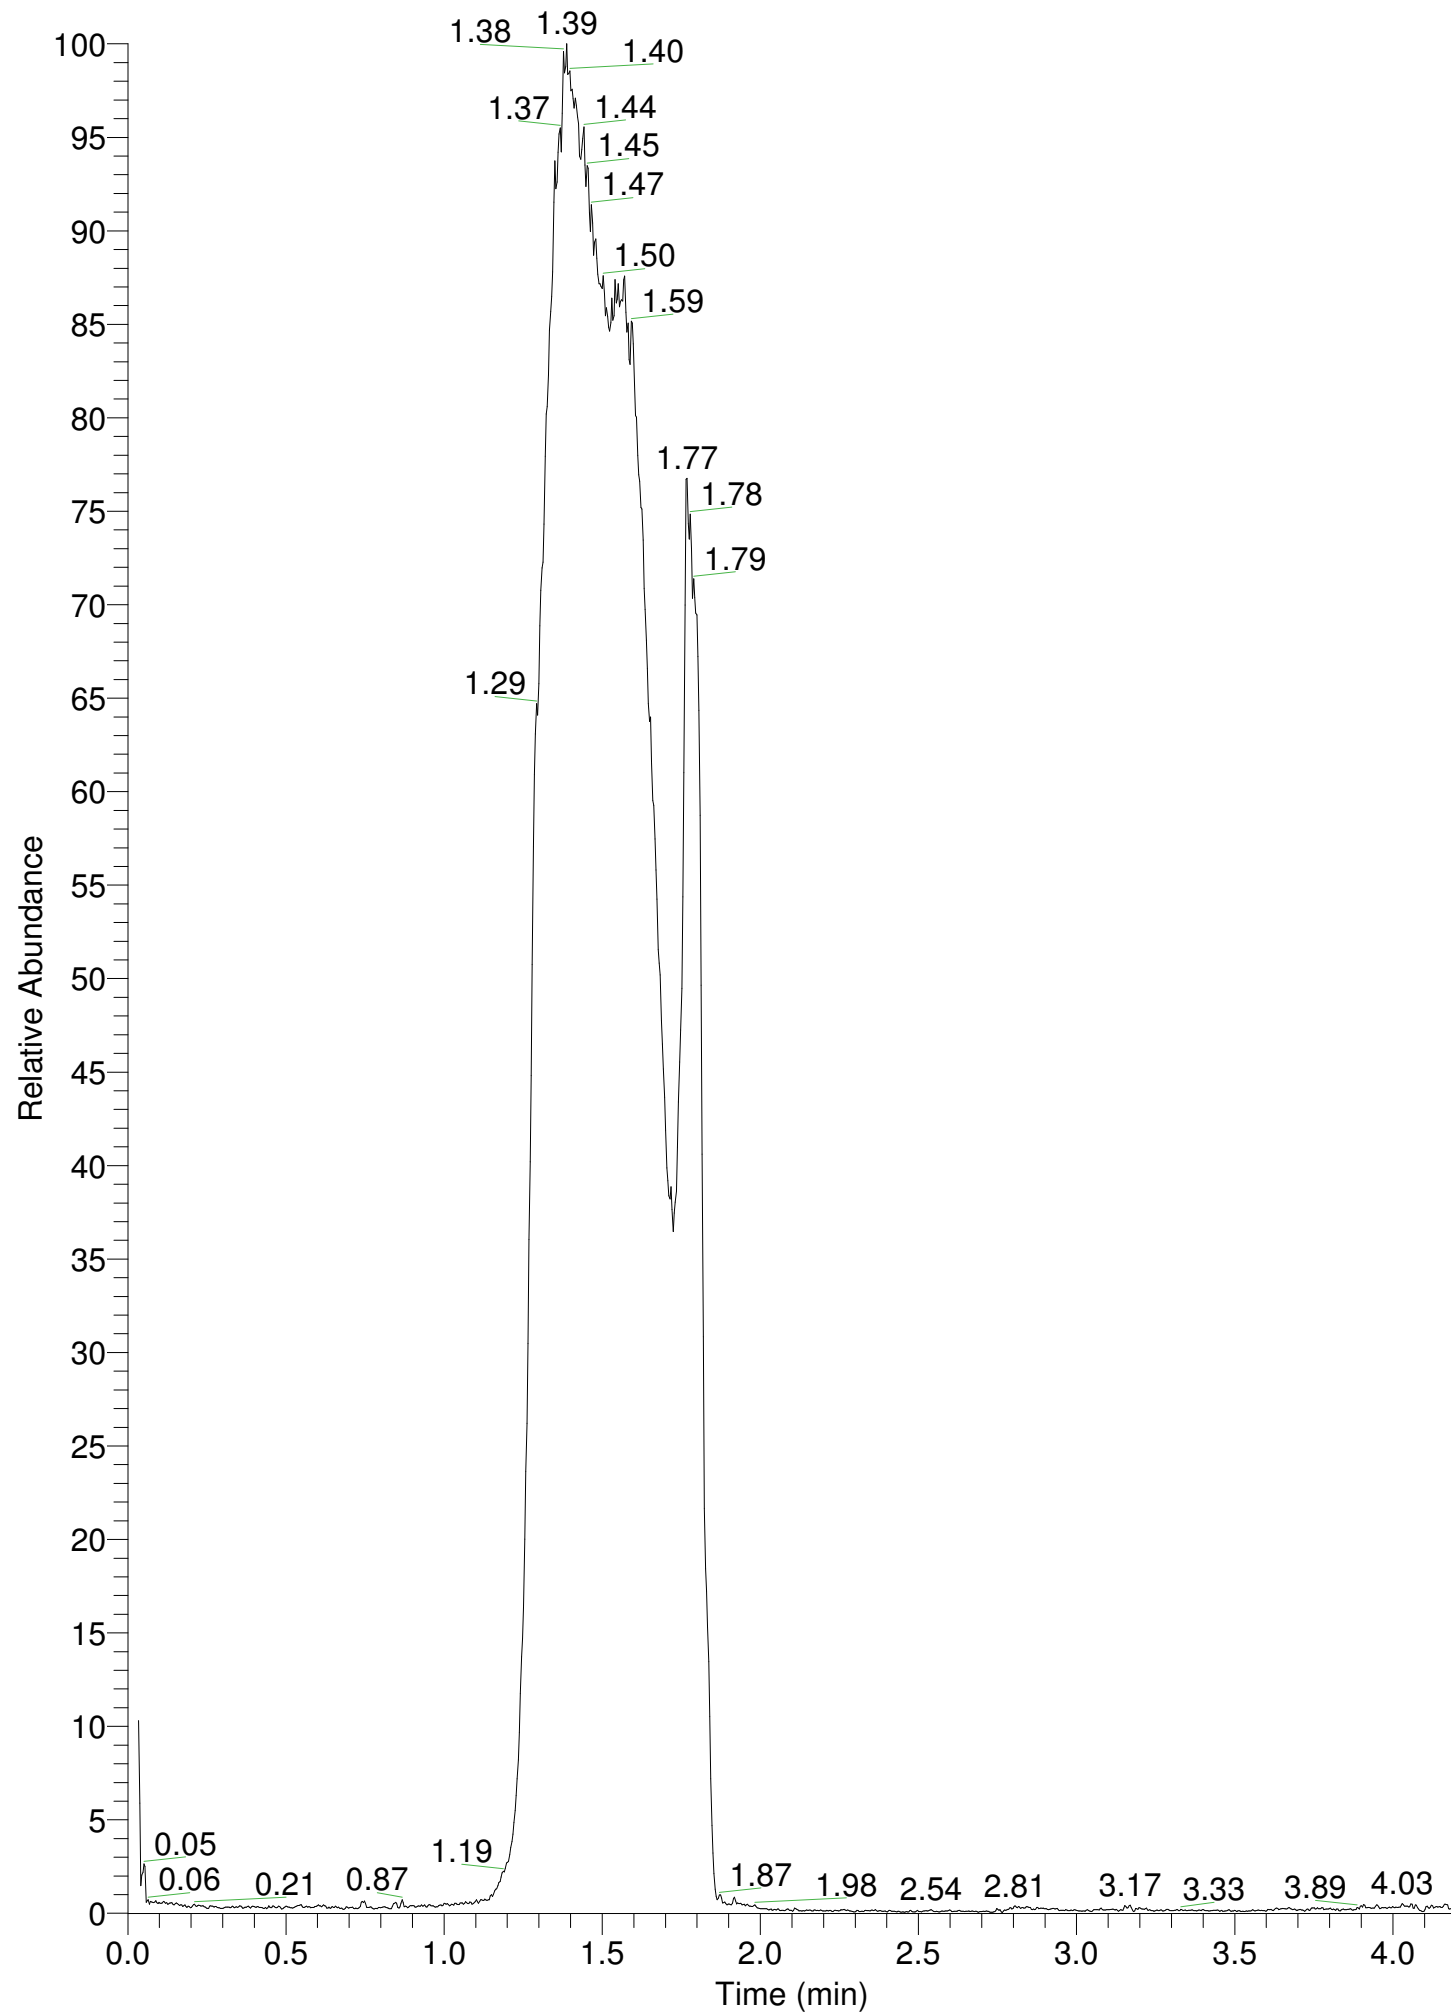

Hayam-128 #421 RT: 1.46 AV: 1 NL: 1.70E6

T: {0,0} + c EI Full ms [50.00-600.00]

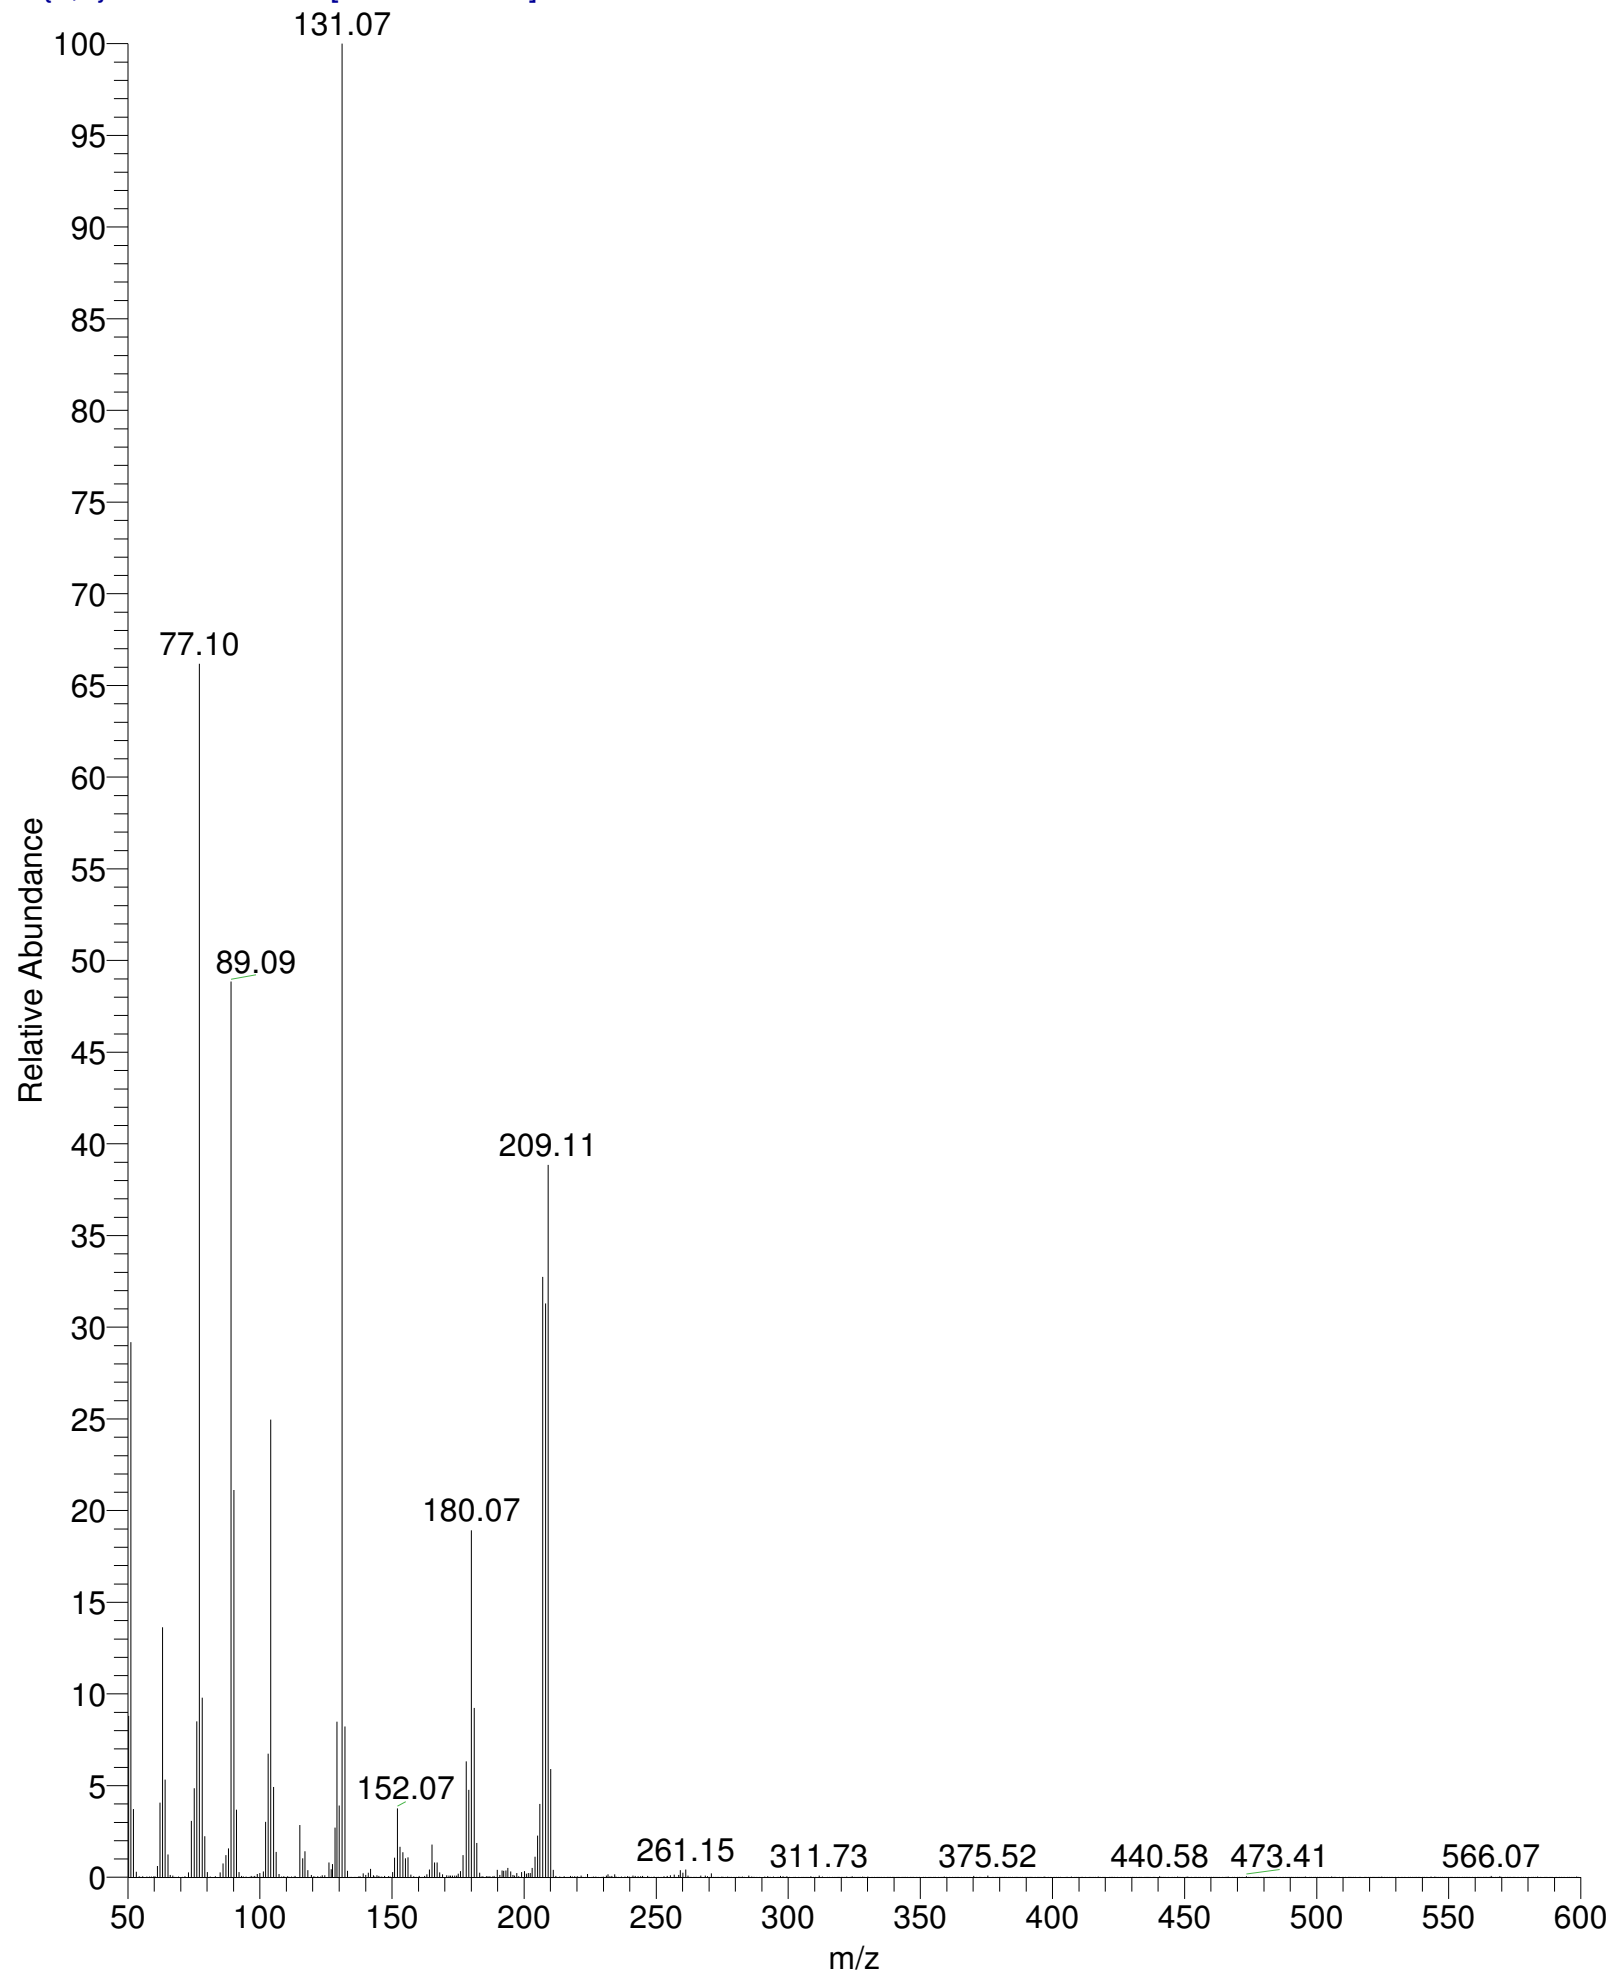

Hayam-128#421 RT: 1.46

T: {0,0} + c EI Full ms [50.00-600.00]

m/z= 50.00-600.02

| m/z    | Intensity | Relative |
|--------|-----------|----------|
| 50.25  | 149247.9  | 8.78     |
| 51.14  | 495884.7  | 29.17    |
| 52.13  | 63071.8   | 3.71     |
| 53.20  | 4784.7    | 0.28     |
| 54.27  | 719.7     | 0.04     |
| 54.92  | 252.4     | 0.01     |
| 55.62  | 595.3     | 0.04     |
| 57.23  | 560.7     | 0.03     |
| 58.16  | 299.2     | 0.02     |
| 58.95  | 483.2     | 0.03     |
| 59.82  | 769.8     | 0.05     |
| 60.39  | 481.9     | 0.03     |
| 61.15  | 10367.4   | 0.61     |
| 62.14  | 69029.8   | 4.06     |
| 63.12  | 231642.8  | 13.63    |
| 64.12  | 90312.7   | 5.31     |
| 65.15  | 20916.2   | 1.23     |
| 66.01  | 2031.1    | 0.12     |
| 67.05  | 1205.8    | 0.07     |
| 67.62  | 3.1       | 0.00     |
| 68.21  | 25.4      | 0.00     |
| 69.20  | 433.9     | 0.03     |
| 70.65  | 114.8     | 0.01     |
| 71.57  | 695.1     | 0.04     |
| 72.97  | 4194.0    | 0.25     |
| 74.08  | 51944.3   | 3.06     |
| 75.13  | 82368.9   | 4.85     |
| 76.15  | 144476.2  | 8.50     |
| 77.10  | 1124828.9 | 66.17    |
| 78.14  | 166382.9  | 9.79     |
| 79.08  | 37732.3   | 2.22     |
| 80.04  | 4636.4    | 0.27     |
| 81.23  | 474.2     | 0.03     |
| 83.18  | 756.5     | 0.04     |
| 84.99  | 4261.7    | 0.25     |
| 86.05  | 12572.1   | 0.74     |
| 87.11  | 20259.5   | 1.19     |
| 88.13  | 26510.9   | 1.56     |
| 89.09  | 830369.5  | 48.85    |
| 90.12  | 358866.7  | 21.11    |
| 91.14  | 62301.9   | 3.66     |
| 92.13  | 4529.2    | 0.27     |
| 93.06  | 1007.6    | 0.06     |
| 93.79  | 489.4     | 0.03     |
| 94.72  | 365.8     | 0.02     |
| 95.93  | 199.8     | 0.01     |
| 96.69  | 945.3     | 0.06     |
| 97.42  | 586.7     | 0.03     |
| 98.03  | 941.7     | 0.06     |
| 98.99  | 2885.6    | 0.17     |
| 99.98  | 3680.6    | 0.22     |
| 100.50 | 252.5     | 0.01     |
| 101.31 | 5054.1    | 0.30     |
| 102.12 | 51225.8   | 3.01     |
| 103.10 | 114444.4  | 6.73     |

Hayam-128#421 RT: 1.46

T: {0,0} + c EI Full ms [50.00-600.00]

m/z= 50.00-600.02

| m/z    | Intensity | Relative |
|--------|-----------|----------|
| 104.10 | 424061.0  | 24.95    |
| 105.13 | 83452.4   | 4.91     |
| 106.16 | 23199.6   | 1.36     |
| 107.22 | 2730.6    | 0.16     |
| 108.16 | 512.2     | 0.03     |
| 109.10 | 670.5     | 0.04     |
| 109.84 | 0.0       | 0.00     |
| 110.54 | 659.3     | 0.04     |
| 111.09 | 32.1      | 0.00     |
| 111.95 | 377.5     | 0.02     |
| 112.65 | 280.6     | 0.02     |
| 113.32 | 928.2     | 0.05     |
| 115.11 | 48274.9   | 2.84     |
| 116.13 | 17431.7   | 1.03     |
| 117.10 | 23795.9   | 1.40     |
| 118.13 | 6236.4    | 0.37     |
| 119.41 | 1920.4    | 0.11     |
| 120.38 | 822.4     | 0.05     |
| 121.04 | 148.7     | 0.01     |
| 121.89 | 731.6     | 0.04     |
| 122.93 | 349.7     | 0.02     |
| 123.58 | 1534.3    | 0.09     |
| 124.61 | 1649.3    | 0.10     |
| 126.10 | 13404.3   | 0.79     |
| 126.93 | 7386.7    | 0.43     |
| 127.46 | 12075.7   | 0.71     |
| 128.39 | 45779.1   | 2.69     |
| 129.14 | 144033.1  | 8.47     |
| 129.98 | 66364.2   | 3.90     |
| 131.07 | 1699943.5 | 100.00   |
| 132.13 | 139455.0  | 8.20     |
| 133.15 | 5800.7    | 0.34     |
| 134.11 | 26.7      | 0.00     |
| 134.79 | 38.2      | 0.00     |
| 135.66 | 230.9     | 0.01     |
| 136.31 | 6.8       | 0.00     |
| 137.26 | 532.6     | 0.03     |
| 137.86 | 880.8     | 0.05     |
| 139.13 | 3314.6    | 0.19     |
| 140.09 | 1800.1    | 0.11     |
| 140.98 | 4083.3    | 0.24     |
| 141.88 | 7456.3    | 0.44     |
| 142.91 | 1521.3    | 0.09     |
| 143.46 | 366.3     | 0.02     |
| 144.29 | 1615.9    | 0.10     |
| 145.06 | 1091.5    | 0.06     |
| 145.58 | 11.9      | 0.00     |
| 146.13 | 422.7     | 0.02     |
| 147.22 | 891.8     | 0.05     |
| 148.71 | 616.3     | 0.04     |
| 149.24 | 445.9     | 0.03     |
| 150.27 | 4550.8    | 0.27     |
| 151.01 | 17804.8   | 1.05     |
| 152.07 | 63531.4   | 3.74     |
| 153.07 | 27992.6   | 1.65     |

Hayam-128#421 RT: 1.46

T: {0,0} + c EI Full ms [50.00-600.00]

m/z= 50.00-600.02

| m/z    | Intensity | Relative |
|--------|-----------|----------|
| 154.10 | 23133.0   | 1.36     |
| 155.10 | 17453.1   | 1.03     |
| 156.09 | 18124.2   | 1.07     |
| 157.13 | 2221.6    | 0.13     |
| 158.17 | 736.6     | 0.04     |
| 159.21 | 0.9       | 0.00     |
| 160.26 | 1129.4    | 0.07     |
| 161.31 | 237.6     | 0.01     |
| 162.31 | 1166.6    | 0.07     |
| 163.25 | 2565.2    | 0.15     |
| 164.15 | 7084.5    | 0.42     |
| 165.07 | 30090.0   | 1.77     |
| 166.08 | 13505.5   | 0.79     |
| 167.06 | 13363.6   | 0.79     |
| 168.07 | 4334.5    | 0.25     |
| 169.18 | 2483.7    | 0.15     |
| 170.66 | 1591.9    | 0.09     |
| 171.51 | 1293.8    | 0.08     |
| 172.12 | 1395.4    | 0.08     |
| 172.92 | 1217.9    | 0.07     |
| 173.73 | 1460.1    | 0.09     |
| 174.40 | 1312.7    | 0.08     |
| 175.07 | 3214.0    | 0.19     |
| 175.86 | 5475.9    | 0.32     |
| 176.88 | 20317.4   | 1.20     |
| 178.05 | 107121.1  | 6.30     |
| 179.10 | 80876.1   | 4.76     |
| 180.07 | 321459.5  | 18.91    |
| 181.11 | 156717.5  | 9.22     |
| 182.12 | 31672.4   | 1.86     |
| 183.13 | 4045.5    | 0.24     |
| 183.73 | 321.0     | 0.02     |
| 184.39 | 871.2     | 0.05     |
| 185.69 | 668.5     | 0.04     |
| 186.34 | 679.5     | 0.04     |
| 187.09 | 640.1     | 0.04     |
| 188.01 | 406.3     | 0.02     |
| 188.57 | 1100.3    | 0.06     |
| 189.90 | 6633.2    | 0.39     |
| 190.77 | 1967.3    | 0.12     |
| 191.65 | 5973.9    | 0.35     |
| 192.22 | 5864.3    | 0.34     |
| 193.11 | 6157.7    | 0.36     |
| 193.88 | 8413.9    | 0.49     |
| 194.99 | 5224.3    | 0.31     |
| 195.72 | 1958.1    | 0.12     |
| 196.43 | 1301.4    | 0.08     |
| 197.17 | 3657.9    | 0.22     |
| 197.94 | 792.9     | 0.05     |
| 199.04 | 4503.7    | 0.26     |
| 200.13 | 5550.3    | 0.33     |
| 200.89 | 3028.4    | 0.18     |
| 201.64 | 3766.0    | 0.22     |
| 202.25 | 3743.0    | 0.22     |
| 203.00 | 8579.9    | 0.50     |

Hayam-128#421 RT: 1.46

T: {0,0} + c EI Full ms [50.00-600.00]

m/z= 50.00-600.02

| m/z    | Intensity | Relative |
|--------|-----------|----------|
| 204.12 | 18924.1   | 1.11     |
| 205.11 | 38443.3   | 2.26     |
| 205.92 | 67851.1   | 3.99     |
| 207.03 | 556464.1  | 32.73    |
| 208.09 | 531657.1  | 31.27    |
| 209.11 | 660295.1  | 38.84    |
| 210.11 | 100140.0  | 5.89     |
| 211.09 | 6625.4    | 0.39     |
| 211.94 | 937.2     | 0.06     |
| 213.41 | 299.1     | 0.02     |
| 213.94 | 205.7     | 0.01     |
| 215.14 | 852.8     | 0.05     |
| 216.19 | 38.8      | 0.00     |
| 217.00 | 292.4     | 0.02     |
| 217.60 | 992.3     | 0.06     |
| 218.33 | 387.0     | 0.02     |
| 219.20 | 677.6     | 0.04     |
| 220.07 | 778.1     | 0.05     |
| 220.71 | 151.7     | 0.01     |
| 221.60 | 1316.4    | 0.08     |
| 222.31 | 90.3      | 0.01     |
| 223.24 | 62.6      | 0.00     |
| 224.00 | 2786.3    | 0.16     |
| 225.65 | 168.4     | 0.01     |
| 226.31 | 382.7     | 0.02     |
| 227.13 | 446.8     | 0.03     |
| 228.08 | 18.6      | 0.00     |
| 229.20 | 145.0     | 0.01     |
| 229.91 | 443.6     | 0.03     |
| 231.16 | 1310.8    | 0.08     |
| 231.71 | 2470.4    | 0.15     |
| 232.47 | 861.5     | 0.05     |
| 233.14 | 970.1     | 0.06     |
| 234.24 | 2428.1    | 0.14     |
| 234.81 | 402.7     | 0.02     |
| 235.75 | 18.7      | 0.00     |
| 236.81 | 452.2     | 0.03     |
| 238.12 | 503.2     | 0.03     |
| 239.14 | 754.1     | 0.04     |
| 239.74 | 381.2     | 0.02     |
| 240.55 | 280.9     | 0.02     |
| 241.16 | 1392.3    | 0.08     |
| 241.99 | 1062.1    | 0.06     |
| 243.18 | 666.4     | 0.04     |
| 244.11 | 720.9     | 0.04     |
| 244.84 | 1096.8    | 0.06     |
| 245.39 | 50.3      | 0.00     |
| 246.79 | 1175.3    | 0.07     |
| 247.45 | 0.2       | 0.00     |
| 248.22 | 178.3     | 0.01     |
| 249.24 | 468.9     | 0.03     |
| 250.34 | 0.0       | 0.00     |
| 250.89 | 20.1      | 0.00     |
| 251.85 | 2.6       | 0.00     |
| 252.99 | 635.5     | 0.04     |

Hayam-128#421 RT: 1.46

T: {0,0} + c EI Full ms [50.00-600.00]

m/z= 50.00-600.02

| m/z    | Intensity | Relative |
|--------|-----------|----------|
| 254.21 | 1029.4    | 0.06     |
| 255.32 | 1492.2    | 0.09     |
| 256.83 | 2092.2    | 0.12     |
| 257.51 | 251.6     | 0.01     |
| 258.50 | 2011.9    | 0.12     |
| 259.10 | 6454.5    | 0.38     |
| 260.10 | 4120.5    | 0.24     |
| 261.15 | 7077.5    | 0.42     |
| 262.05 | 1319.7    | 0.08     |
| 262.70 | 248.3     | 0.01     |
| 263.23 | 28.0      | 0.00     |
| 264.21 | 0.0       | 0.00     |
| 264.71 | 0.0       | 0.00     |
| 265.29 | 25.9      | 0.00     |
| 266.23 | 1.9       | 0.00     |
| 266.90 | 1190.8    | 0.07     |
| 268.59 | 1330.1    | 0.08     |
| 269.46 | 764.7     | 0.04     |
| 270.24 | 0.0       | 0.00     |
| 270.88 | 3408.9    | 0.20     |
| 271.64 | 53.3      | 0.00     |
| 272.34 | 0.6       | 0.00     |
| 273.10 | 13.1      | 0.00     |
| 273.67 | 0.4       | 0.00     |
| 274.89 | 381.7     | 0.02     |
| 275.49 | 0.0       | 0.00     |
| 276.34 | 0.0       | 0.00     |
| 277.01 | 302.8     | 0.02     |
| 277.88 | 28.3      | 0.00     |
| 278.54 | 178.1     | 0.01     |
| 279.51 | 9.7       | 0.00     |
| 280.32 | 3.7       | 0.00     |
| 281.24 | 388.0     | 0.02     |
| 282.06 | 253.4     | 0.01     |
| 282.63 | 547.8     | 0.03     |
| 283.35 | 282.1     | 0.02     |
| 285.09 | 1354.3    | 0.08     |
| 286.15 | 371.7     | 0.02     |
| 286.69 | 0.0       | 0.00     |
| 287.27 | 232.1     | 0.01     |
| 288.12 | 0.3       | 0.00     |
| 289.11 | 2.2       | 0.00     |
| 291.04 | 320.8     | 0.02     |
| 292.18 | 686.0     | 0.04     |
| 292.73 | 34.2      | 0.00     |
| 293.28 | 0.2       | 0.00     |
| 294.41 | 372.8     | 0.02     |
| 295.77 | 250.6     | 0.01     |
| 296.34 | 65.2      | 0.00     |
| 297.08 | 1008.6    | 0.06     |
| 297.98 | 887.0     | 0.05     |
| 298.74 | 207.1     | 0.01     |
| 299.50 | 637.6     | 0.04     |
| 300.48 | 36.7      | 0.00     |
| 302.07 | 0.0       | 0.00     |

Hayam-128#421 RT: 1.46

T: {0,0} + c EI Full ms [50.00-600.00]

m/z= 50.00-600.02

| m/z    | Intensity | Relative |
|--------|-----------|----------|
| 302.78 | 0.0       | 0.00     |
| 303.97 | 0.1       | 0.00     |
| 305.19 | 0.0       | 0.00     |
| 305.85 | 21.7      | 0.00     |
| 306.75 | 0.1       | 0.00     |
| 307.51 | 65.3      | 0.00     |
| 308.49 | 676.4     | 0.04     |
| 309.55 | 0.0       | 0.00     |
| 310.33 | 0.2       | 0.00     |
| 311.73 | 1243.1    | 0.07     |
| 312.86 | 572.6     | 0.03     |
| 314.81 | 1.6       | 0.00     |
| 315.62 | 0.0       | 0.00     |
| 316.74 | 0.0       | 0.00     |
| 317.61 | 0.0       | 0.00     |
| 318.43 | 0.0       | 0.00     |
| 318.95 | 0.0       | 0.00     |
| 319.50 | 0.1       | 0.00     |
| 320.11 | 0.1       | 0.00     |
| 320.67 | 0.0       | 0.00     |
| 321.39 | 0.0       | 0.00     |
| 322.16 | 451.2     | 0.03     |
| 323.42 | 0.3       | 0.00     |
| 324.14 | 799.8     | 0.05     |
| 324.96 | 0.0       | 0.00     |
| 325.64 | 0.0       | 0.00     |
| 326.31 | 166.1     | 0.01     |
| 326.84 | 0.1       | 0.00     |
| 327.37 | 0.0       | 0.00     |
| 328.16 | 482.3     | 0.03     |
| 328.91 | 0.0       | 0.00     |
| 330.12 | 341.4     | 0.02     |
| 331.66 | 241.5     | 0.01     |
| 332.67 | 153.3     | 0.01     |
| 333.66 | 0.1       | 0.00     |
| 334.34 | 0.0       | 0.00     |
| 335.13 | 0.0       | 0.00     |
| 336.31 | 39.6      | 0.00     |
| 337.46 | 10.5      | 0.00     |
| 338.10 | 17.5      | 0.00     |
| 338.76 | 45.3      | 0.00     |
| 339.54 | 267.8     | 0.02     |
| 340.07 | 11.7      | 0.00     |
| 341.09 | 0.3       | 0.00     |
| 341.85 | 0.0       | 0.00     |
| 343.09 | 170.0     | 0.01     |
| 343.80 | 0.0       | 0.00     |
| 344.38 | 0.0       | 0.00     |
| 345.10 | 161.5     | 0.01     |
| 346.23 | 0.0       | 0.00     |
| 346.79 | 0.0       | 0.00     |
| 347.44 | 0.0       | 0.00     |
| 348.67 | 0.1       | 0.00     |
| 349.61 | 266.5     | 0.02     |
| 351.20 | 0.0       | 0.00     |



Hayam-128#421 RT: 1.46

T: {0,0} + c EI Full ms [50.00-600.00]

m/z= 50.00-600.02

| m/z    | Intensity | Relative |
|--------|-----------|----------|
| 351.95 | 139.6     | 0.01     |
| 353.25 | 0.1       | 0.00     |
| 353.94 | 0.0       | 0.00     |
| 355.07 | 0.1       | 0.00     |
| 355.67 | 0.0       | 0.00     |
| 356.87 | 0.0       | 0.00     |
| 357.88 | 119.6     | 0.01     |
| 358.55 | 22.4      | 0.00     |
| 359.06 | 477.6     | 0.03     |
| 359.95 | 0.0       | 0.00     |
| 361.07 | 22.6      | 0.00     |
| 362.22 | 19.0      | 0.00     |
| 363.16 | 15.7      | 0.00     |
| 363.95 | 1.3       | 0.00     |
| 364.47 | 0.0       | 0.00     |
| 365.56 | 0.1       | 0.00     |
| 366.52 | 58.2      | 0.00     |
| 367.67 | 0.2       | 0.00     |
| 368.69 | 12.2      | 0.00     |
| 370.24 | 906.2     | 0.05     |
| 371.30 | 0.0       | 0.00     |
| 372.38 | 0.0       | 0.00     |
| 372.88 | 1.2       | 0.00     |
| 374.42 | 253.5     | 0.01     |
| 375.52 | 1265.3    | 0.07     |
| 377.46 | 24.3      | 0.00     |
| 378.55 | 1.4       | 0.00     |
| 379.29 | 0.4       | 0.00     |
| 379.94 | 0.0       | 0.00     |
| 380.48 | 0.0       | 0.00     |
| 381.20 | 0.0       | 0.00     |
| 381.81 | 0.0       | 0.00     |
| 382.46 | 0.0       | 0.00     |
| 383.43 | 0.0       | 0.00     |
| 383.96 | 23.5      | 0.00     |
| 384.88 | 0.0       | 0.00     |
| 385.86 | 0.0       | 0.00     |
| 386.38 | 0.2       | 0.00     |
| 386.96 | 0.0       | 0.00     |
| 387.80 | 7.6       | 0.00     |
| 388.65 | 26.3      | 0.00     |
| 389.73 | 0.0       | 0.00     |
| 390.37 | 0.1       | 0.00     |
| 391.18 | 0.2       | 0.00     |
| 391.74 | 0.1       | 0.00     |
| 392.27 | 0.3       | 0.00     |
| 393.41 | 0.2       | 0.00     |
| 394.39 | 41.0      | 0.00     |
| 394.95 | 0.0       | 0.00     |
| 395.61 | 152.0     | 0.01     |
| 396.80 | 309.4     | 0.02     |
| 397.36 | 0.1       | 0.00     |
| 398.39 | 7.3       | 0.00     |
| 399.37 | 223.0     | 0.01     |
| 400.61 | 0.0       | 0.00     |

Hayam-128#421 RT: 1.46

T: {0,0} + c EI Full ms [50.00-600.00]

m/z= 50.00-600.02

| m/z    | Intensity | Relative |
|--------|-----------|----------|
| 401.41 | 1.1       | 0.00     |
| 402.34 | 0.0       | 0.00     |
| 403.03 | 0.3       | 0.00     |
| 405.16 | 25.9      | 0.00     |
| 405.68 | 0.1       | 0.00     |
| 407.18 | 384.8     | 0.02     |
| 408.44 | 0.0       | 0.00     |
| 409.23 | 0.1       | 0.00     |
| 409.95 | 0.0       | 0.00     |
| 410.85 | 0.0       | 0.00     |
| 411.37 | 0.2       | 0.00     |
| 412.49 | 0.1       | 0.00     |
| 413.86 | 206.2     | 0.01     |
| 414.46 | 0.0       | 0.00     |
| 415.33 | 0.0       | 0.00     |
| 416.23 | 33.8      | 0.00     |
| 417.28 | 389.4     | 0.02     |
| 418.08 | 0.0       | 0.00     |
| 419.17 | 0.5       | 0.00     |
| 419.90 | 0.1       | 0.00     |
| 421.73 | 0.0       | 0.00     |
| 422.28 | 1.0       | 0.00     |
| 422.79 | 0.0       | 0.00     |
| 423.55 | 0.0       | 0.00     |
| 424.52 | 0.7       | 0.00     |
| 426.06 | 0.0       | 0.00     |
| 427.16 | 184.6     | 0.01     |
| 428.63 | 21.9      | 0.00     |
| 429.72 | 123.8     | 0.01     |
| 430.29 | 0.0       | 0.00     |
| 430.92 | 245.3     | 0.01     |
| 431.72 | 0.1       | 0.00     |
| 432.78 | 1.2       | 0.00     |
| 433.51 | 0.0       | 0.00     |
| 435.05 | 50.5      | 0.00     |
| 435.72 | 0.0       | 0.00     |
| 436.25 | 0.2       | 0.00     |
| 436.91 | 0.0       | 0.00     |
| 438.11 | 0.0       | 0.00     |
| 438.74 | 0.0       | 0.00     |
| 440.58 | 710.0     | 0.04     |
| 441.21 | 0.3       | 0.00     |
| 441.87 | 0.0       | 0.00     |
| 442.61 | 0.0       | 0.00     |
| 443.87 | 0.1       | 0.00     |
| 445.28 | 258.2     | 0.02     |
| 446.22 | 133.8     | 0.01     |
| 447.36 | 429.5     | 0.03     |
| 448.01 | 0.0       | 0.00     |
| 448.61 | 0.2       | 0.00     |
| 449.45 | 0.0       | 0.00     |
| 450.44 | 178.1     | 0.01     |
| 450.94 | 361.6     | 0.02     |
| 451.50 | 26.2      | 0.00     |
| 452.50 | 19.1      | 0.00     |

Hayam-128#421 RT: 1.46

T: {0,0} + c EI Full ms [50.00-600.00]

m/z= 50.00-600.02

| m/z    | Intensity | Relative |
|--------|-----------|----------|
| 453.84 | 253.1     | 0.01     |
| 454.41 | 0.0       | 0.00     |
| 455.35 | 11.8      | 0.00     |
| 456.00 | 188.0     | 0.01     |
| 457.07 | 0.0       | 0.00     |
| 458.20 | 38.0      | 0.00     |
| 459.54 | 253.9     | 0.01     |
| 460.17 | 0.0       | 0.00     |
| 460.86 | 103.8     | 0.01     |
| 461.53 | 0.0       | 0.00     |
| 462.20 | 0.0       | 0.00     |
| 463.07 | 0.0       | 0.00     |
| 464.41 | 0.1       | 0.00     |
| 465.38 | 123.7     | 0.01     |
| 465.88 | 25.8      | 0.00     |
| 466.54 | 405.6     | 0.02     |
| 468.16 | 83.2      | 0.00     |
| 468.97 | 0.0       | 0.00     |
| 470.10 | 17.4      | 0.00     |
| 470.83 | 0.0       | 0.00     |
| 471.80 | 0.1       | 0.00     |
| 473.41 | 648.2     | 0.04     |
| 474.07 | 0.0       | 0.00     |
| 474.83 | 0.0       | 0.00     |
| 475.92 | 0.8       | 0.00     |
| 476.71 | 0.1       | 0.00     |
| 477.43 | 0.0       | 0.00     |
| 478.05 | 22.2      | 0.00     |
| 478.92 | 1.2       | 0.00     |
| 479.94 | 248.8     | 0.01     |
| 480.84 | 17.9      | 0.00     |
| 481.47 | 0.0       | 0.00     |
| 482.10 | 0.3       | 0.00     |
| 482.68 | 243.9     | 0.01     |
| 483.41 | 0.3       | 0.00     |
| 484.14 | 0.0       | 0.00     |
| 484.79 | 0.3       | 0.00     |
| 486.08 | 217.6     | 0.01     |
| 487.38 | 0.1       | 0.00     |
| 488.24 | 151.5     | 0.01     |
| 489.14 | 0.0       | 0.00     |
| 489.84 | 0.1       | 0.00     |
| 490.43 | 0.0       | 0.00     |
| 491.10 | 17.1      | 0.00     |
| 492.09 | 0.0       | 0.00     |
| 492.71 | 0.0       | 0.00     |
| 493.38 | 1.3       | 0.00     |
| 494.15 | 0.3       | 0.00     |
| 494.77 | 0.0       | 0.00     |
| 495.29 | 0.0       | 0.00     |
| 495.84 | 312.9     | 0.02     |
| 497.37 | 7.2       | 0.00     |
| 497.99 | 201.9     | 0.01     |
| 498.93 | 0.7       | 0.00     |
| 499.59 | 0.1       | 0.00     |

Hayam-128#421 RT: 1.46

T: {0,0} + c EI Full ms [50.00-600.00]

m/z= 50.00-600.02

| m/z    | Intensity | Relative |
|--------|-----------|----------|
| 500.30 | 17.4      | 0.00     |
| 501.06 | 0.0       | 0.00     |
| 501.59 | 8.6       | 0.00     |
| 502.69 | 0.0       | 0.00     |
| 503.52 | 0.0       | 0.00     |
| 504.35 | 75.9      | 0.00     |
| 505.56 | 543.5     | 0.03     |
| 506.07 | 0.3       | 0.00     |
| 506.66 | 1.7       | 0.00     |
| 507.23 | 5.5       | 0.00     |
| 508.62 | 5.0       | 0.00     |
| 509.93 | 176.3     | 0.01     |
| 510.95 | 0.0       | 0.00     |
| 511.99 | 0.0       | 0.00     |
| 512.50 | 0.0       | 0.00     |
| 513.03 | 0.2       | 0.00     |
| 513.90 | 0.0       | 0.00     |
| 514.75 | 104.3     | 0.01     |
| 516.12 | 0.0       | 0.00     |
| 516.69 | 0.0       | 0.00     |
| 518.19 | 0.0       | 0.00     |
| 518.73 | 0.0       | 0.00     |
| 519.54 | 0.4       | 0.00     |
| 520.21 | 0.0       | 0.00     |
| 520.98 | 0.0       | 0.00     |
| 521.62 | 0.0       | 0.00     |
| 522.13 | 7.3       | 0.00     |
| 522.84 | 1.3       | 0.00     |
| 523.44 | 7.0       | 0.00     |
| 523.95 | 1.1       | 0.00     |
| 524.58 | 308.5     | 0.02     |
| 525.70 | 0.1       | 0.00     |
| 526.69 | 0.2       | 0.00     |
| 527.68 | 266.7     | 0.02     |
| 528.54 | 22.6      | 0.00     |
| 529.81 | 0.1       | 0.00     |
| 530.90 | 174.9     | 0.01     |
| 532.26 | 0.0       | 0.00     |
| 533.30 | 22.8      | 0.00     |
| 534.79 | 8.4       | 0.00     |
| 535.50 | 0.0       | 0.00     |
| 536.38 | 0.3       | 0.00     |
| 537.26 | 0.1       | 0.00     |
| 537.84 | 0.0       | 0.00     |
| 538.52 | 36.2      | 0.00     |
| 539.05 | 21.1      | 0.00     |
| 540.16 | 0.4       | 0.00     |
| 540.77 | 0.1       | 0.00     |
| 541.66 | 146.9     | 0.01     |
| 543.29 | 385.6     | 0.02     |
| 544.71 | 541.7     | 0.03     |
| 545.51 | 0.0       | 0.00     |
| 546.16 | 0.0       | 0.00     |
| 546.94 | 0.0       | 0.00     |
| 547.68 | 24.8      | 0.00     |

Hayam-128#421 RT: 1.46

T: {0,0} + c EI Full ms [50.00-600.00]

m/z= 50.00-600.02

| m/z    | Intensity | Relative |
|--------|-----------|----------|
| 548.43 | 0.0       | 0.00     |
| 549.26 | 0.3       | 0.00     |
| 549.93 | 0.0       | 0.00     |
| 550.75 | 0.0       | 0.00     |
| 551.29 | 0.0       | 0.00     |
| 552.41 | 1.6       | 0.00     |
| 553.17 | 1.0       | 0.00     |
| 553.98 | 0.1       | 0.00     |
| 555.10 | 0.1       | 0.00     |
| 555.90 | 5.0       | 0.00     |
| 556.54 | 0.1       | 0.00     |
| 557.21 | 0.2       | 0.00     |
| 557.95 | 0.0       | 0.00     |
| 559.03 | 0.1       | 0.00     |
| 559.97 | 0.0       | 0.00     |
| 560.92 | 0.0       | 0.00     |
| 561.45 | 0.0       | 0.00     |
| 562.20 | 0.0       | 0.00     |
| 563.20 | 0.0       | 0.00     |
| 563.72 | 0.9       | 0.00     |
| 564.39 | 0.0       | 0.00     |
| 565.34 | 17.3      | 0.00     |
| 566.07 | 941.3     | 0.06     |
| 566.71 | 44.1      | 0.00     |
| 567.79 | 0.0       | 0.00     |
| 568.58 | 0.9       | 0.00     |
| 569.28 | 878.8     | 0.05     |
| 569.97 | 188.4     | 0.01     |
| 571.32 | 19.6      | 0.00     |
| 572.23 | 0.1       | 0.00     |
| 572.82 | 187.4     | 0.01     |
| 573.49 | 0.7       | 0.00     |
| 574.40 | 198.3     | 0.01     |
| 574.99 | 0.0       | 0.00     |
| 576.21 | 131.3     | 0.01     |
| 577.59 | 0.0       | 0.00     |
| 578.31 | 0.1       | 0.00     |
| 578.98 | 190.0     | 0.01     |
| 580.20 | 36.2      | 0.00     |
| 581.39 | 0.0       | 0.00     |
| 582.07 | 0.1       | 0.00     |
| 582.89 | 0.0       | 0.00     |
| 583.62 | 566.4     | 0.03     |
| 584.81 | 172.6     | 0.01     |
| 586.37 | 0.0       | 0.00     |
| 587.07 | 0.0       | 0.00     |
| 588.38 | 59.5      | 0.00     |
| 589.02 | 0.1       | 0.00     |
| 590.67 | 1.9       | 0.00     |
| 591.82 | 207.4     | 0.01     |
| 592.72 | 0.2       | 0.00     |
| 593.63 | 0.0       | 0.00     |
| 595.03 | 0.1       | 0.00     |
| 595.77 | 0.2       | 0.00     |
| 596.54 | 30.8      | 0.00     |

Hayam-128#421 RT: 1.46

T: {0,0} + c EI Full ms [50.00-600.00]

m/z= 50.00-600.02

| m/z    | Intensity | Relative |
|--------|-----------|----------|
| 597.38 | 0.1       | 0.00     |
| 598.42 | 392.1     | 0.02     |
| 599.04 | 0.0       | 0.00     |
