# Supplementary material for: A Simple and Efficient Multicomponent Synthesis of Novel Pyrazole, N-aminopyridine and Pyrazolo[3,4-b]Pyridine Derivatives in Water
Source: Preprints.org preprint supplement (doi:10.20944/preprints202312.1232.v1), 2023-12-28
Supplement: Supplementary file 55 [file supplementary]

RT: 0.00 - 4.24

NL:  
8.22E4  
TIC MS  
Selwan-64

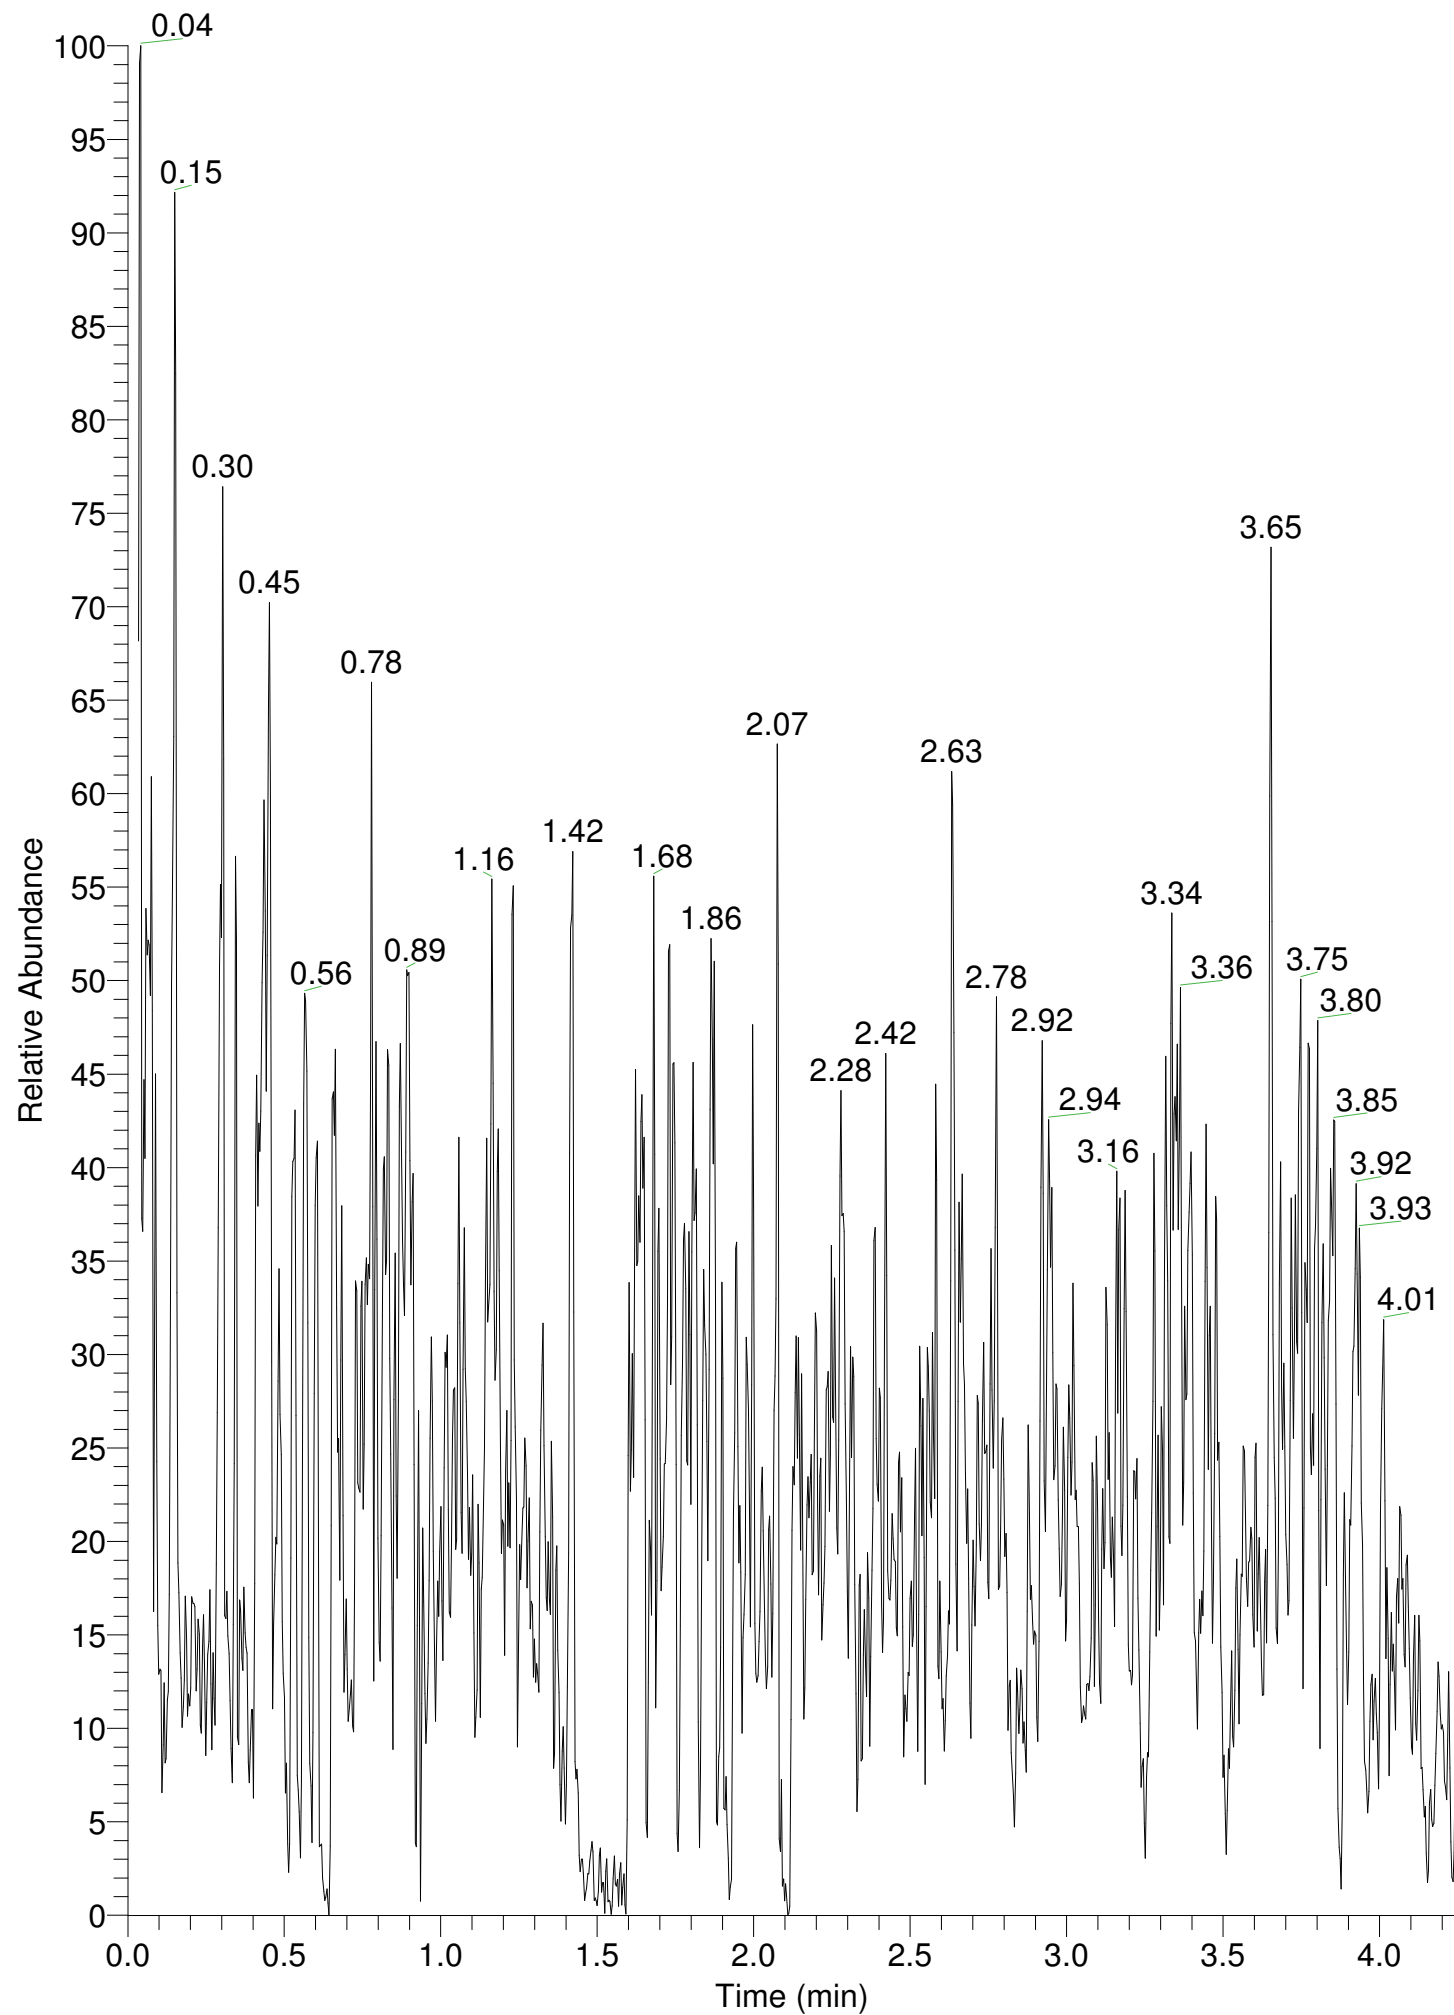

Selwan-64 #117-121 RT: 0.43-0.44 AV: 5 NL: 7.03E3

T: {0,0} + c EI Full ms [50.00-1000.00]

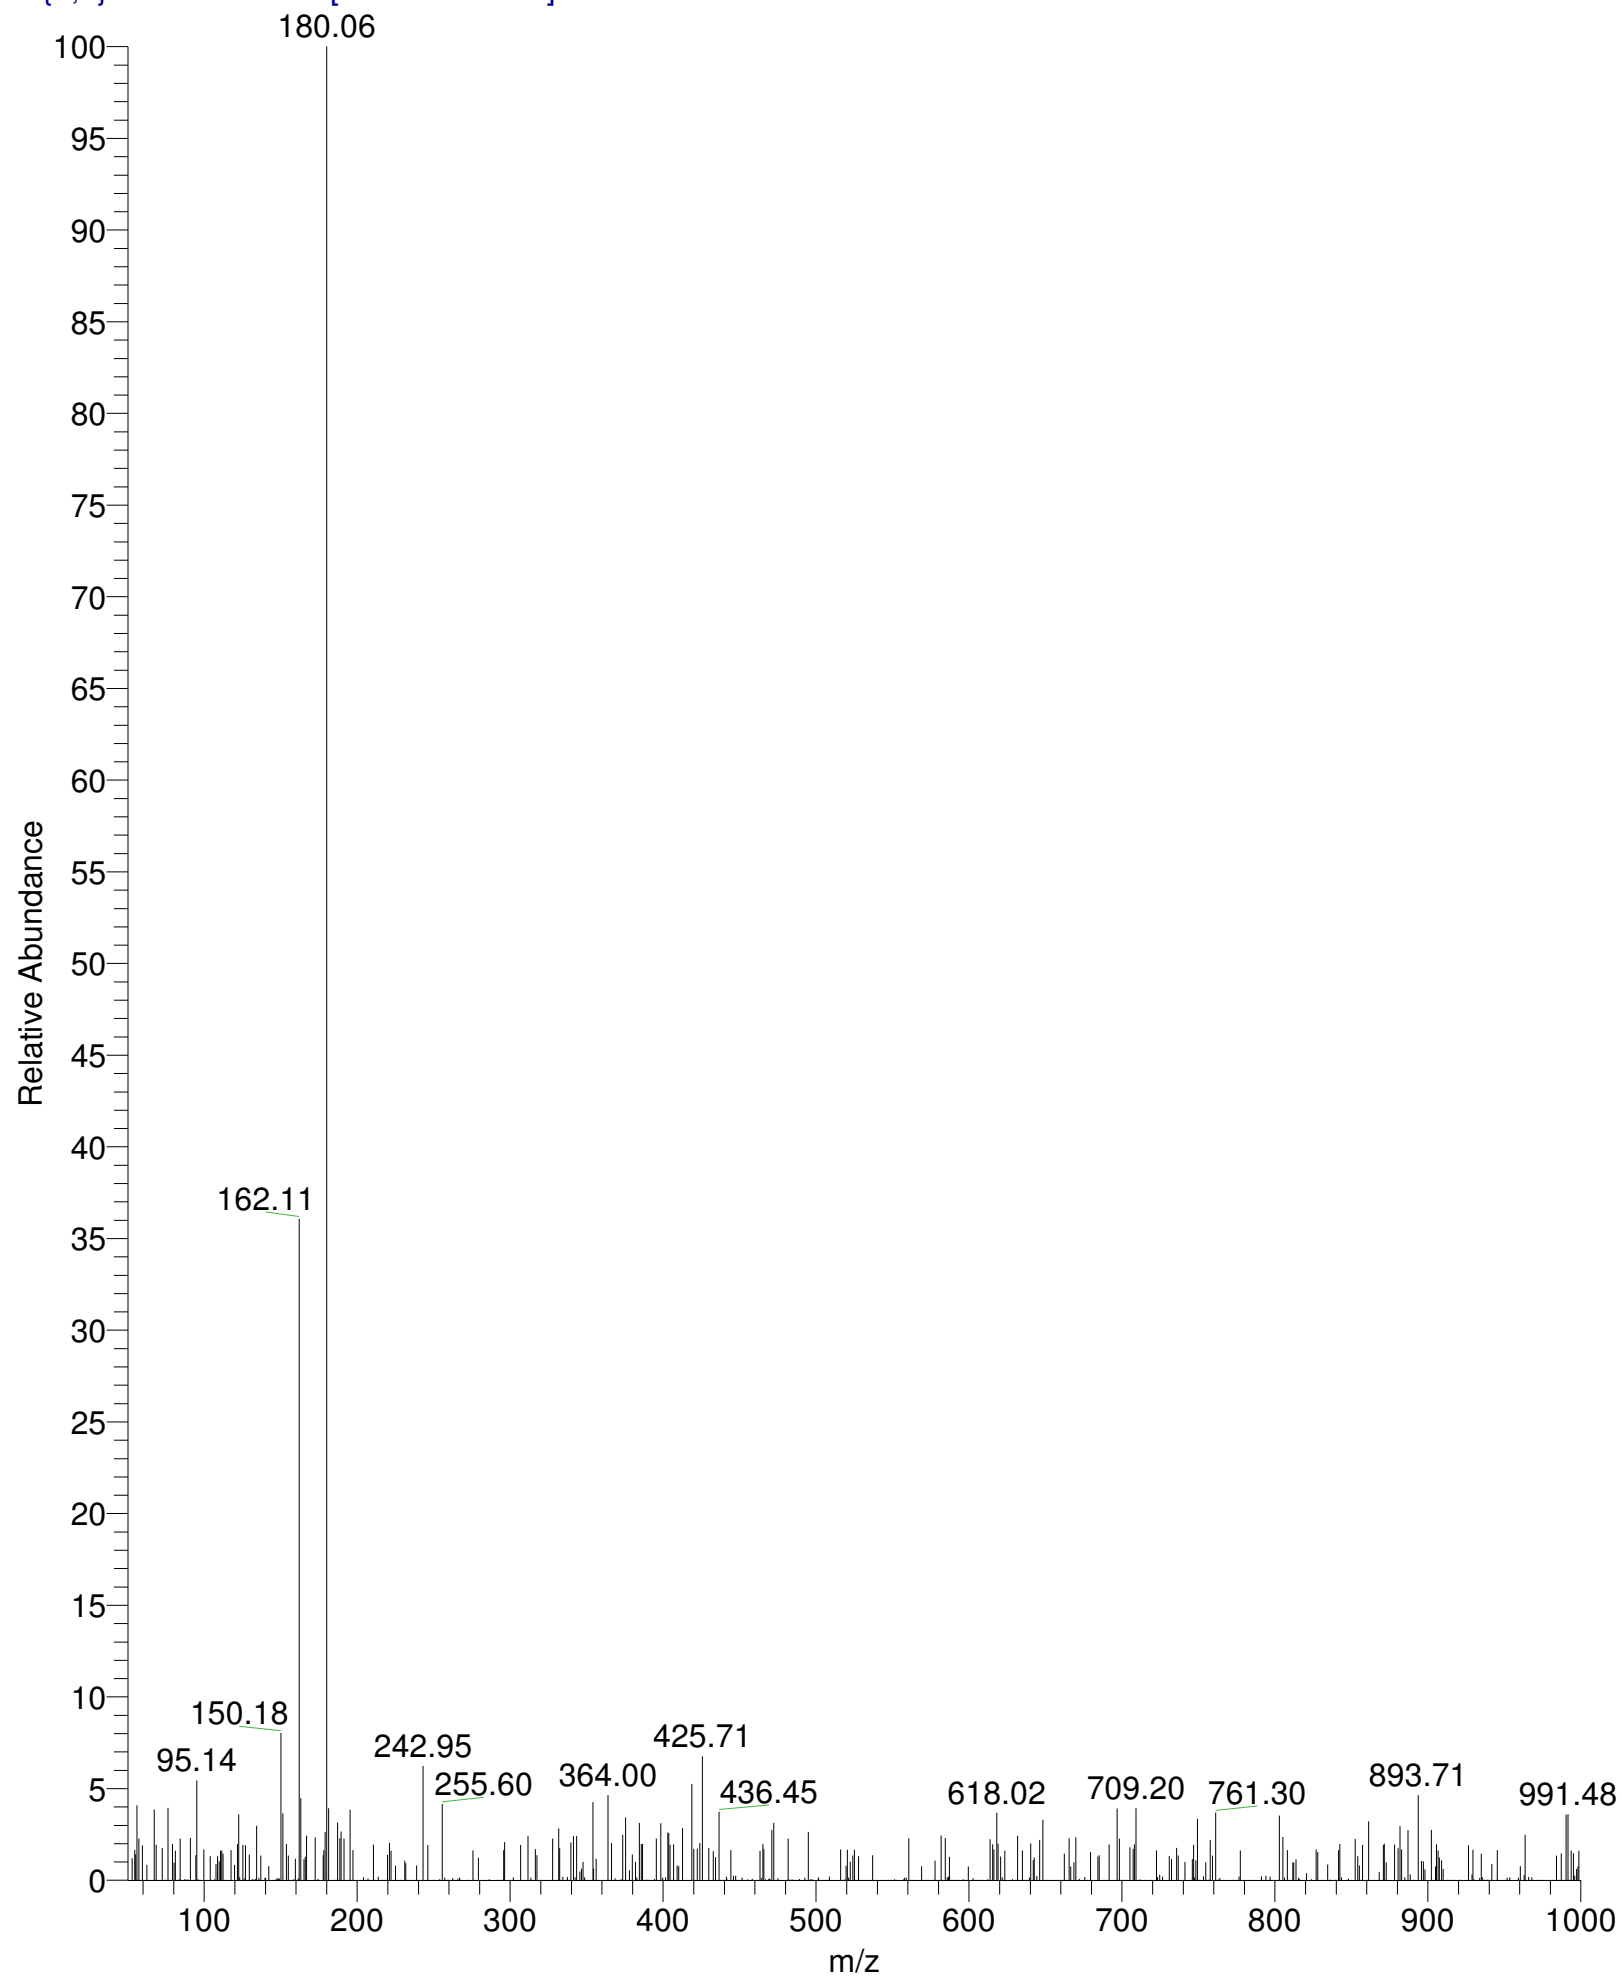

Selwan-64#117-121 RT: 0.43-0.44 AV: 5

T: {0,0} + c EI Full ms [50.00-1000.00]

m/z= 50.00-1000.04

| m/z    | Intensity | Relative |
|--------|-----------|----------|
| 50.05  | 0.1       | 0.00     |
| 51.26  | 0.0       | 0.00     |
| 52.89  | 83.6      | 1.19     |
| 54.49  | 116.4     | 1.66     |
| 55.15  | 99.3      | 1.41     |
| 55.98  | 286.4     | 4.07     |
| 56.37  | 0.0       | 0.00     |
| 57.13  | 158.7     | 2.26     |
| 57.99  | 0.0       | 0.00     |
| 58.53  | 0.0       | 0.00     |
| 59.49  | 133.5     | 1.90     |
| 60.34  | 0.0       | 0.00     |
| 61.27  | 0.0       | 0.00     |
| 62.53  | 58.6      | 0.83     |
| 63.51  | 0.0       | 0.00     |
| 64.84  | 0.0       | 0.00     |
| 65.93  | 0.0       | 0.00     |
| 67.28  | 270.5     | 3.85     |
| 67.65  | 0.1       | 0.00     |
| 68.49  | 135.7     | 1.93     |
| 69.25  | 0.0       | 0.00     |
| 69.87  | 0.0       | 0.00     |
| 71.04  | 0.0       | 0.00     |
| 72.55  | 123.8     | 1.76     |
| 73.55  | 0.0       | 0.00     |
| 74.10  | 0.0       | 0.00     |
| 74.61  | 0.0       | 0.00     |
| 75.16  | 0.0       | 0.00     |
| 76.22  | 276.2     | 3.93     |
| 77.04  | 0.0       | 0.00     |
| 77.98  | 0.0       | 0.00     |
| 79.24  | 137.7     | 1.96     |
| 80.18  | 67.4      | 0.96     |
| 80.99  | 112.0     | 1.59     |
| 81.51  | 0.0       | 0.00     |
| 82.33  | 0.0       | 0.00     |
| 83.64  | 3.0       | 0.04     |
| 84.27  | 158.9     | 2.26     |
| 85.26  | 0.0       | 0.00     |
| 85.90  | 0.0       | 0.00     |
| 87.36  | 3.7       | 0.05     |
| 87.97  | 0.0       | 0.00     |
| 89.31  | 3.1       | 0.04     |
| 90.90  | 161.9     | 2.30     |
| 91.87  | 0.0       | 0.00     |
| 92.72  | 0.0       | 0.00     |
| 93.55  | 0.0       | 0.00     |
| 94.40  | 94.8      | 1.35     |
| 95.14  | 381.7     | 5.43     |
| 95.94  | 2.5       | 0.04     |
| 97.25  | 0.0       | 0.00     |
| 98.28  | 0.0       | 0.00     |
| 99.64  | 116.8     | 1.66     |
| 100.89 | 0.0       | 0.00     |
| 101.93 | 0.0       | 0.00     |

Selwan-64#117-121 RT: 0.43-0.44 AV: 5

T: {0,0} + c EI Full ms [50.00-1000.00]

m/z= 50.00-1000.04

| m/z    | Intensity | Relative |
|--------|-----------|----------|
| 103.27 | 0.0       | 0.00     |
| 103.96 | 91.7      | 1.30     |
| 104.55 | 0.5       | 0.01     |
| 105.16 | 0.0       | 0.00     |
| 106.56 | 3.6       | 0.05     |
| 107.73 | 60.4      | 0.86     |
| 108.77 | 91.7      | 1.30     |
| 109.82 | 72.3      | 1.03     |
| 110.52 | 112.8     | 1.60     |
| 111.42 | 113.7     | 1.62     |
| 112.22 | 101.6     | 1.44     |
| 113.42 | 0.0       | 0.00     |
| 114.40 | 0.0       | 0.00     |
| 115.23 | 0.0       | 0.00     |
| 117.54 | 114.3     | 1.63     |
| 118.71 | 0.0       | 0.00     |
| 119.87 | 58.5      | 0.83     |
| 120.56 | 0.0       | 0.00     |
| 121.63 | 137.9     | 1.96     |
| 122.46 | 251.8     | 3.58     |
| 123.12 | 10.8      | 0.15     |
| 124.32 | 0.0       | 0.00     |
| 125.16 | 134.9     | 1.92     |
| 126.06 | 5.4       | 0.08     |
| 126.91 | 133.5     | 1.90     |
| 127.73 | 0.0       | 0.00     |
| 128.89 | 0.0       | 0.00     |
| 129.44 | 97.2      | 1.38     |
| 129.96 | 0.0       | 0.00     |
| 130.75 | 0.0       | 0.00     |
| 131.44 | 2.5       | 0.04     |
| 132.37 | 1.6       | 0.02     |
| 132.90 | 0.0       | 0.00     |
| 133.55 | 4.2       | 0.06     |
| 134.26 | 207.8     | 2.96     |
| 135.70 | 7.8       | 0.11     |
| 136.35 | 0.0       | 0.00     |
| 136.95 | 94.2      | 1.34     |
| 137.74 | 0.0       | 0.00     |
| 138.47 | 0.0       | 0.00     |
| 139.58 | 7.4       | 0.11     |
| 140.16 | 9.0       | 0.13     |
| 141.47 | 0.0       | 0.00     |
| 142.07 | 53.4      | 0.76     |
| 143.01 | 0.0       | 0.00     |
| 144.69 | 0.0       | 0.00     |
| 145.50 | 0.1       | 0.00     |
| 146.15 | 0.0       | 0.00     |
| 146.96 | 2.6       | 0.04     |
| 147.70 | 5.4       | 0.08     |
| 148.28 | 7.5       | 0.11     |
| 149.13 | 5.7       | 0.08     |
| 150.18 | 564.3     | 8.02     |
| 151.36 | 256.2     | 3.64     |
| 152.28 | 0.0       | 0.00     |

Selwan-64#117-121 RT: 0.43-0.44 AV: 5

T: {0,0} + c EI Full ms [50.00-1000.00]

m/z= 50.00-1000.04

| m/z    | Intensity | Relative |
|--------|-----------|----------|
| 153.58 | 137.7     | 1.96     |
| 154.29 | 0.0       | 0.00     |
| 154.84 | 93.3      | 1.33     |
| 156.12 | 0.0       | 0.00     |
| 156.69 | 0.0       | 0.00     |
| 157.82 | 0.0       | 0.00     |
| 158.57 | 2.6       | 0.04     |
| 159.49 | 81.7      | 1.16     |
| 160.77 | 0.0       | 0.00     |
| 161.35 | 6.6       | 0.09     |
| 162.11 | 2535.4    | 36.06    |
| 163.10 | 314.1     | 4.47     |
| 163.72 | 0.0       | 0.00     |
| 165.27 | 80.8      | 1.15     |
| 165.95 | 88.4      | 1.26     |
| 166.80 | 170.3     | 2.42     |
| 168.02 | 0.0       | 0.00     |
| 170.50 | 0.0       | 0.00     |
| 171.53 | 0.0       | 0.00     |
| 172.48 | 164.2     | 2.34     |
| 173.08 | 0.0       | 0.00     |
| 174.30 | 4.1       | 0.06     |
| 174.88 | 0.0       | 0.00     |
| 177.73 | 95.2      | 1.35     |
| 178.24 | 115.0     | 1.64     |
| 178.89 | 184.5     | 2.62     |
| 180.06 | 7032.0    | 100.00   |
| 180.71 | 0.0       | 0.00     |
| 181.28 | 275.1     | 3.91     |
| 181.93 | 0.0       | 0.00     |
| 183.34 | 0.0       | 0.00     |
| 184.53 | 0.0       | 0.00     |
| 185.42 | 0.0       | 0.00     |
| 185.93 | 0.0       | 0.00     |
| 186.53 | 0.0       | 0.00     |
| 187.17 | 219.9     | 3.13     |
| 187.69 | 0.3       | 0.00     |
| 188.68 | 160.8     | 2.29     |
| 189.50 | 186.5     | 2.65     |
| 189.93 | 0.0       | 0.00     |
| 191.28 | 159.1     | 2.26     |
| 191.95 | 0.0       | 0.00     |
| 192.47 | 0.0       | 0.00     |
| 193.74 | 0.0       | 0.00     |
| 194.41 | 0.0       | 0.00     |
| 195.24 | 269.9     | 3.84     |
| 195.78 | 0.0       | 0.00     |
| 197.21 | 114.3     | 1.63     |
| 197.82 | 0.0       | 0.00     |
| 198.51 | 0.0       | 0.00     |
| 199.85 | 0.0       | 0.00     |
| 200.44 | 0.0       | 0.00     |
| 201.90 | 0.0       | 0.00     |
| 203.19 | 0.0       | 0.00     |
| 204.17 | 10.7      | 0.15     |

Selwan-64#117-121 RT: 0.43-0.44 AV: 5

T: {0,0} + c EI Full ms [50.00-1000.00]

m/z= 50.00-1000.04

| m/z    | Intensity | Relative |
|--------|-----------|----------|
| 205.32 | 0.0       | 0.00     |
| 206.19 | 0.0       | 0.00     |
| 207.00 | 5.1       | 0.07     |
| 208.07 | 0.0       | 0.00     |
| 208.61 | 0.0       | 0.00     |
| 210.57 | 135.1     | 1.92     |
| 211.49 | 0.0       | 0.00     |
| 212.06 | 0.0       | 0.00     |
| 213.62 | 12.6      | 0.18     |
| 214.27 | 0.0       | 0.00     |
| 215.57 | 0.0       | 0.00     |
| 216.40 | 0.0       | 0.00     |
| 217.35 | 0.0       | 0.00     |
| 218.09 | 0.0       | 0.00     |
| 218.74 | 0.0       | 0.00     |
| 219.87 | 96.7      | 1.38     |
| 221.10 | 143.2     | 2.04     |
| 222.17 | 112.2     | 1.60     |
| 223.68 | 0.0       | 0.00     |
| 224.41 | 0.0       | 0.00     |
| 224.92 | 54.3      | 0.77     |
| 226.08 | 0.0       | 0.00     |
| 226.99 | 0.0       | 0.00     |
| 228.14 | 0.0       | 0.00     |
| 228.72 | 0.0       | 0.00     |
| 229.52 | 0.0       | 0.00     |
| 230.87 | 0.0       | 0.00     |
| 231.10 | 74.4      | 1.06     |
| 231.77 | 63.9      | 0.91     |
| 232.43 | 0.0       | 0.00     |
| 233.16 | 0.0       | 0.00     |
| 234.84 | 0.0       | 0.00     |
| 235.84 | 0.0       | 0.00     |
| 236.73 | 0.0       | 0.00     |
| 237.98 | 0.0       | 0.00     |
| 238.72 | 55.4      | 0.79     |
| 239.92 | 0.0       | 0.00     |
| 241.04 | 0.0       | 0.00     |
| 242.25 | 0.0       | 0.00     |
| 242.95 | 437.2     | 6.22     |
| 244.15 | 0.0       | 0.00     |
| 245.20 | 0.0       | 0.00     |
| 246.05 | 134.4     | 1.91     |
| 247.18 | 0.0       | 0.00     |
| 248.32 | 0.0       | 0.00     |
| 249.77 | 0.0       | 0.00     |
| 250.38 | 0.0       | 0.00     |
| 250.90 | 0.0       | 0.00     |
| 252.29 | 0.0       | 0.00     |
| 253.23 | 0.0       | 0.00     |
| 253.94 | 2.5       | 0.04     |
| 255.60 | 291.5     | 4.15     |
| 256.79 | 0.0       | 0.00     |
| 257.30 | 9.3       | 0.13     |
| 258.80 | 0.0       | 0.00     |

Selwan-64#117-121 RT: 0.43-0.44 AV: 5

T: {0,0} + c EI Full ms [50.00-1000.00]

m/z= 50.00-1000.04

| m/z    | Intensity | Relative |
|--------|-----------|----------|
| 259.37 | 0.0       | 0.00     |
| 259.82 | 0.0       | 0.00     |
| 260.66 | 0.0       | 0.00     |
| 261.44 | 0.0       | 0.00     |
| 262.50 | 7.5       | 0.11     |
| 263.61 | 0.0       | 0.00     |
| 264.32 | 0.0       | 0.00     |
| 265.76 | 5.3       | 0.08     |
| 266.75 | 9.0       | 0.13     |
| 267.53 | 1.6       | 0.02     |
| 268.13 | 0.0       | 0.00     |
| 271.30 | 0.0       | 0.00     |
| 271.97 | 0.0       | 0.00     |
| 272.58 | 0.0       | 0.00     |
| 273.96 | 0.0       | 0.00     |
| 275.54 | 114.0     | 1.62     |
| 276.13 | 0.0       | 0.00     |
| 276.76 | 0.0       | 0.00     |
| 277.37 | 0.0       | 0.00     |
| 279.28 | 85.9      | 1.22     |
| 281.13 | 0.0       | 0.00     |
| 281.75 | 0.0       | 0.00     |
| 282.66 | 0.0       | 0.00     |
| 283.34 | 0.0       | 0.00     |
| 285.34 | 0.0       | 0.00     |
| 286.27 | 3.6       | 0.05     |
| 287.19 | 0.0       | 0.00     |
| 290.01 | 0.0       | 0.00     |
| 291.29 | 0.0       | 0.00     |
| 291.80 | 0.0       | 0.00     |
| 292.50 | 0.0       | 0.00     |
| 293.73 | 0.3       | 0.00     |
| 294.27 | 0.0       | 0.00     |
| 294.91 | 0.0       | 0.00     |
| 295.66 | 114.3     | 1.63     |
| 296.42 | 145.9     | 2.08     |
| 298.79 | 0.0       | 0.00     |
| 299.37 | 0.0       | 0.00     |
| 300.29 | 0.0       | 0.00     |
| 300.82 | 0.0       | 0.00     |
| 302.01 | 10.6      | 0.15     |
| 303.03 | 0.0       | 0.00     |
| 303.98 | 0.0       | 0.00     |
| 305.51 | 0.0       | 0.00     |
| 306.82 | 135.0     | 1.92     |
| 307.04 | 0.0       | 0.00     |
| 307.66 | 0.0       | 0.00     |
| 309.12 | 0.0       | 0.00     |
| 309.63 | 0.0       | 0.00     |
| 311.60 | 170.3     | 2.42     |
| 312.84 | 0.0       | 0.00     |
| 313.59 | 8.9       | 0.13     |
| 314.82 | 0.0       | 0.00     |
| 316.41 | 118.7     | 1.69     |
| 317.57 | 95.4      | 1.36     |

Selwan-64#117-121 RT: 0.43-0.44 AV: 5

T: {0,0} + c EI Full ms [50.00-1000.00]

m/z= 50.00-1000.04

| m/z    | Intensity | Relative |
|--------|-----------|----------|
| 319.33 | 0.0       | 0.00     |
| 319.89 | 0.0       | 0.00     |
| 320.62 | 0.0       | 0.00     |
| 321.32 | 0.0       | 0.00     |
| 322.60 | 0.0       | 0.00     |
| 323.26 | 0.0       | 0.00     |
| 324.38 | 0.0       | 0.00     |
| 325.38 | 0.0       | 0.00     |
| 325.94 | 0.0       | 0.00     |
| 327.73 | 159.5     | 2.27     |
| 328.43 | 0.0       | 0.00     |
| 329.88 | 0.0       | 0.00     |
| 330.65 | 0.0       | 0.00     |
| 331.75 | 198.4     | 2.82     |
| 332.42 | 122.0     | 1.73     |
| 333.03 | 0.0       | 0.00     |
| 333.62 | 0.0       | 0.00     |
| 334.52 | 12.7      | 0.18     |
| 335.82 | 0.0       | 0.00     |
| 336.74 | 0.0       | 0.00     |
| 337.43 | 11.1      | 0.16     |
| 338.07 | 0.0       | 0.00     |
| 339.08 | 0.0       | 0.00     |
| 339.69 | 144.3     | 2.05     |
| 341.39 | 169.3     | 2.41     |
| 342.33 | 10.8      | 0.15     |
| 343.49 | 168.4     | 2.40     |
| 344.85 | 0.0       | 0.00     |
| 345.56 | 32.4      | 0.46     |
| 346.51 | 44.1      | 0.63     |
| 347.58 | 69.1      | 0.98     |
| 348.65 | 10.7      | 0.15     |
| 349.37 | 0.0       | 0.00     |
| 350.11 | 0.0       | 0.00     |
| 351.40 | 0.0       | 0.00     |
| 353.12 | 0.0       | 0.00     |
| 354.05 | 299.4     | 4.26     |
| 354.58 | 43.3      | 0.62     |
| 355.21 | 0.0       | 0.00     |
| 356.17 | 82.0      | 1.17     |
| 356.96 | 0.3       | 0.00     |
| 357.60 | 0.0       | 0.00     |
| 358.88 | 0.0       | 0.00     |
| 360.55 | 0.0       | 0.00     |
| 361.10 | 0.0       | 0.00     |
| 362.05 | 0.0       | 0.00     |
| 363.32 | 0.0       | 0.00     |
| 364.00 | 326.2     | 4.64     |
| 365.00 | 0.0       | 0.00     |
| 366.17 | 142.3     | 2.02     |
| 366.71 | 0.0       | 0.00     |
| 368.44 | 7.3       | 0.10     |
| 369.15 | 0.0       | 0.00     |
| 369.71 | 0.0       | 0.00     |
| 370.78 | 0.0       | 0.00     |



Selwan-64#117-121 RT: 0.43-0.44 AV: 5

T: {0,0} + c EI Full ms [50.00-1000.00]

m/z= 50.00-1000.04

| m/z    | Intensity | Relative |
|--------|-----------|----------|
| 371.81 | 0.0       | 0.00     |
| 372.57 | 3.1       | 0.04     |
| 373.52 | 173.5     | 2.47     |
| 374.38 | 0.0       | 0.00     |
| 375.37 | 240.2     | 3.42     |
| 375.97 | 0.4       | 0.01     |
| 377.03 | 0.0       | 0.00     |
| 378.04 | 37.7      | 0.54     |
| 379.01 | 0.0       | 0.00     |
| 379.82 | 97.9      | 1.39     |
| 380.62 | 0.3       | 0.00     |
| 381.88 | 69.9      | 0.99     |
| 382.84 | 8.7       | 0.12     |
| 383.35 | 0.0       | 0.00     |
| 384.37 | 218.9     | 3.11     |
| 385.62 | 138.2     | 1.96     |
| 386.44 | 138.1     | 1.96     |
| 387.41 | 0.0       | 0.00     |
| 389.03 | 2.1       | 0.03     |
| 389.24 | 0.0       | 0.00     |
| 390.24 | 0.0       | 0.00     |
| 391.14 | 0.0       | 0.00     |
| 392.06 | 0.2       | 0.00     |
| 392.70 | 0.0       | 0.00     |
| 394.32 | 4.2       | 0.06     |
| 395.43 | 158.6     | 2.25     |
| 396.47 | 0.0       | 0.00     |
| 397.53 | 0.0       | 0.00     |
| 398.39 | 218.4     | 3.11     |
| 398.93 | 0.0       | 0.00     |
| 399.75 | 8.7       | 0.12     |
| 400.32 | 0.0       | 0.00     |
| 401.03 | 0.0       | 0.00     |
| 401.63 | 11.0      | 0.16     |
| 403.00 | 182.6     | 2.60     |
| 403.59 | 179.8     | 2.56     |
| 404.48 | 135.2     | 1.92     |
| 405.15 | 0.0       | 0.00     |
| 406.07 | 0.0       | 0.00     |
| 406.72 | 136.8     | 1.95     |
| 407.70 | 0.0       | 0.00     |
| 409.13 | 55.4      | 0.79     |
| 410.22 | 53.1      | 0.76     |
| 412.57 | 199.2     | 2.83     |
| 414.66 | 0.0       | 0.00     |
| 416.05 | 0.3       | 0.00     |
| 417.13 | 0.0       | 0.00     |
| 417.87 | 0.0       | 0.00     |
| 418.70 | 368.9     | 5.25     |
| 419.93 | 119.5     | 1.70     |
| 420.94 | 0.0       | 0.00     |
| 422.38 | 120.8     | 1.72     |
| 423.91 | 141.5     | 2.01     |
| 425.71 | 474.8     | 6.75     |
| 427.83 | 0.0       | 0.00     |

Selwan-64#117-121 RT: 0.43-0.44 AV: 5

T: {0,0} + c EI Full ms [50.00-1000.00]

m/z= 50.00-1000.04

| m/z    | Intensity | Relative |
|--------|-----------|----------|
| 429.72 | 123.9     | 1.76     |
| 431.75 | 0.0       | 0.00     |
| 432.68 | 111.0     | 1.58     |
| 433.64 | 0.0       | 0.00     |
| 434.17 | 87.9      | 1.25     |
| 435.07 | 0.0       | 0.00     |
| 436.45 | 262.4     | 3.73     |
| 437.05 | 0.0       | 0.00     |
| 437.56 | 0.0       | 0.00     |
| 438.34 | 0.0       | 0.00     |
| 438.91 | 0.0       | 0.00     |
| 440.16 | 0.0       | 0.00     |
| 441.25 | 13.2      | 0.19     |
| 441.83 | 3.2       | 0.05     |
| 442.44 | 0.0       | 0.00     |
| 444.30 | 115.1     | 1.64     |
| 445.01 | 0.0       | 0.00     |
| 445.88 | 16.5      | 0.23     |
| 447.42 | 16.2      | 0.23     |
| 448.31 | 0.0       | 0.00     |
| 449.29 | 0.0       | 0.00     |
| 449.98 | 0.0       | 0.00     |
| 450.96 | 0.0       | 0.00     |
| 451.54 | 9.1       | 0.13     |
| 452.50 | 0.0       | 0.00     |
| 453.31 | 0.0       | 0.00     |
| 454.62 | 0.0       | 0.00     |
| 455.30 | 3.2       | 0.05     |
| 456.84 | 0.0       | 0.00     |
| 457.62 | 0.0       | 0.00     |
| 458.20 | 4.2       | 0.06     |
| 459.56 | 0.0       | 0.00     |
| 461.21 | 0.0       | 0.00     |
| 461.82 | 0.1       | 0.00     |
| 462.70 | 0.0       | 0.00     |
| 463.38 | 112.3     | 1.60     |
| 464.16 | 7.9       | 0.11     |
| 464.76 | 0.0       | 0.00     |
| 465.27 | 137.9     | 1.96     |
| 465.88 | 120.1     | 1.71     |
| 466.96 | 2.5       | 0.04     |
| 468.66 | 2.5       | 0.04     |
| 469.45 | 5.5       | 0.08     |
| 470.04 | 3.2       | 0.05     |
| 471.11 | 192.6     | 2.74     |
| 472.39 | 218.5     | 3.11     |
| 473.38 | 0.0       | 0.00     |
| 474.23 | 0.0       | 0.00     |
| 474.95 | 7.3       | 0.10     |
| 475.93 | 0.0       | 0.00     |
| 476.54 | 0.0       | 0.00     |
| 477.75 | 0.0       | 0.00     |
| 479.03 | 0.0       | 0.00     |
| 480.92 | 0.0       | 0.00     |
| 481.68 | 158.3     | 2.25     |

Selwan-64#117-121 RT: 0.43-0.44 AV: 5

T: {0,0} + c EI Full ms [50.00-1000.00]

m/z= 50.00-1000.04

| m/z    | Intensity | Relative |
|--------|-----------|----------|
| 482.21 | 2.5       | 0.04     |
| 482.87 | 0.0       | 0.00     |
| 484.15 | 2.6       | 0.04     |
| 485.09 | 0.0       | 0.00     |
| 485.71 | 0.0       | 0.00     |
| 486.50 | 0.0       | 0.00     |
| 487.62 | 0.0       | 0.00     |
| 488.24 | 0.0       | 0.00     |
| 489.01 | 3.7       | 0.05     |
| 490.36 | 0.0       | 0.00     |
| 490.89 | 0.0       | 0.00     |
| 492.57 | 9.3       | 0.13     |
| 493.19 | 0.3       | 0.00     |
| 493.98 | 0.0       | 0.00     |
| 494.90 | 185.0     | 2.63     |
| 496.29 | 3.0       | 0.04     |
| 497.21 | 3.6       | 0.05     |
| 498.22 | 0.0       | 0.00     |
| 498.93 | 0.0       | 0.00     |
| 500.95 | 2.1       | 0.03     |
| 501.56 | 10.7      | 0.15     |
| 502.73 | 0.0       | 0.00     |
| 503.28 | 0.0       | 0.00     |
| 503.94 | 0.0       | 0.00     |
| 505.07 | 0.3       | 0.00     |
| 505.99 | 0.0       | 0.00     |
| 506.53 | 0.0       | 0.00     |
| 507.38 | 0.0       | 0.00     |
| 508.00 | 0.0       | 0.00     |
| 508.67 | 12.6      | 0.18     |
| 509.70 | 0.0       | 0.00     |
| 511.15 | 0.0       | 0.00     |
| 513.80 | 0.0       | 0.00     |
| 514.85 | 0.0       | 0.00     |
| 515.98 | 116.6     | 1.66     |
| 516.79 | 0.5       | 0.01     |
| 517.57 | 0.0       | 0.00     |
| 518.14 | 0.0       | 0.00     |
| 519.01 | 2.6       | 0.04     |
| 519.60 | 54.6      | 0.78     |
| 520.40 | 116.4     | 1.66     |
| 521.27 | 9.2       | 0.13     |
| 522.35 | 71.0      | 1.01     |
| 524.02 | 93.3      | 1.33     |
| 525.09 | 116.5     | 1.66     |
| 525.74 | 0.0       | 0.00     |
| 526.49 | 0.0       | 0.00     |
| 527.28 | 0.0       | 0.00     |
| 527.83 | 91.6      | 1.30     |
| 528.64 | 0.3       | 0.00     |
| 530.17 | 0.0       | 0.00     |
| 531.32 | 0.0       | 0.00     |
| 531.89 | 0.0       | 0.00     |
| 533.64 | 0.3       | 0.00     |
| 535.19 | 0.0       | 0.00     |

Selwan-64#117-121 RT: 0.43-0.44 AV: 5

T: {0,0} + c EI Full ms [50.00-1000.00]

m/z= 50.00-1000.04

| m/z    | Intensity | Relative |
|--------|-----------|----------|
| 536.10 | 0.0       | 0.00     |
| 536.99 | 95.1      | 1.35     |
| 537.63 | 0.0       | 0.00     |
| 538.23 | 0.0       | 0.00     |
| 538.78 | 0.0       | 0.00     |
| 540.37 | 0.0       | 0.00     |
| 542.62 | 0.0       | 0.00     |
| 543.67 | 0.0       | 0.00     |
| 544.37 | 0.0       | 0.00     |
| 545.34 | 0.0       | 0.00     |
| 546.55 | 0.0       | 0.00     |
| 547.35 | 0.0       | 0.00     |
| 548.42 | 0.0       | 0.00     |
| 549.38 | 0.0       | 0.00     |
| 550.77 | 0.0       | 0.00     |
| 551.31 | 2.6       | 0.04     |
| 552.25 | 0.0       | 0.00     |
| 552.84 | 0.0       | 0.00     |
| 553.93 | 0.0       | 0.00     |
| 556.97 | 3.1       | 0.04     |
| 557.84 | 9.2       | 0.13     |
| 558.85 | 8.9       | 0.13     |
| 559.64 | 0.0       | 0.00     |
| 560.50 | 159.6     | 2.27     |
| 561.11 | 0.0       | 0.00     |
| 561.68 | 0.0       | 0.00     |
| 562.26 | 0.0       | 0.00     |
| 563.30 | 0.0       | 0.00     |
| 563.93 | 0.0       | 0.00     |
| 564.51 | 0.0       | 0.00     |
| 565.63 | 0.0       | 0.00     |
| 566.93 | 0.0       | 0.00     |
| 568.92 | 53.6      | 0.76     |
| 569.56 | 0.0       | 0.00     |
| 570.44 | 0.0       | 0.00     |
| 571.65 | 0.0       | 0.00     |
| 572.50 | 0.0       | 0.00     |
| 573.32 | 0.0       | 0.00     |
| 574.22 | 0.0       | 0.00     |
| 575.79 | 0.0       | 0.00     |
| 576.30 | 0.0       | 0.00     |
| 576.98 | 0.0       | 0.00     |
| 577.80 | 74.4      | 1.06     |
| 578.79 | 0.0       | 0.00     |
| 579.97 | 0.0       | 0.00     |
| 580.74 | 0.0       | 0.00     |
| 581.67 | 170.8     | 2.43     |
| 582.73 | 0.0       | 0.00     |
| 583.27 | 0.0       | 0.00     |
| 584.53 | 161.5     | 2.30     |
| 585.78 | 10.5      | 0.15     |
| 586.52 | 12.9      | 0.18     |
| 587.24 | 89.4      | 1.27     |
| 587.80 | 0.0       | 0.00     |
| 588.45 | 0.0       | 0.00     |

Selwan-64#117-121 RT: 0.43-0.44 AV: 5

T: {0,0} + c EI Full ms [50.00-1000.00]

m/z= 50.00-1000.04

| m/z    | Intensity | Relative |
|--------|-----------|----------|
| 589.70 | 0.0       | 0.00     |
| 590.33 | 0.0       | 0.00     |
| 590.94 | 0.0       | 0.00     |
| 591.47 | 0.0       | 0.00     |
| 592.54 | 0.0       | 0.00     |
| 593.54 | 0.0       | 0.00     |
| 595.13 | 0.0       | 0.00     |
| 596.09 | 3.2       | 0.05     |
| 597.03 | 0.0       | 0.00     |
| 597.81 | 0.0       | 0.00     |
| 598.45 | 0.0       | 0.00     |
| 599.43 | 52.2      | 0.74     |
| 601.16 | 0.0       | 0.00     |
| 602.01 | 0.0       | 0.00     |
| 602.66 | 7.2       | 0.10     |
| 603.56 | 0.5       | 0.01     |
| 604.41 | 0.0       | 0.00     |
| 605.03 | 0.0       | 0.00     |
| 605.84 | 0.0       | 0.00     |
| 606.48 | 0.0       | 0.00     |
| 607.20 | 0.0       | 0.00     |
| 608.68 | 0.0       | 0.00     |
| 609.42 | 0.0       | 0.00     |
| 611.77 | 0.0       | 0.00     |
| 612.27 | 3.1       | 0.04     |
| 613.66 | 156.4     | 2.22     |
| 614.63 | 0.0       | 0.00     |
| 615.40 | 137.2     | 1.95     |
| 616.31 | 117.8     | 1.68     |
| 618.02 | 258.1     | 3.67     |
| 618.99 | 139.2     | 1.98     |
| 620.62 | 90.1      | 1.28     |
| 621.21 | 0.0       | 0.00     |
| 621.74 | 10.6      | 0.15     |
| 622.52 | 0.0       | 0.00     |
| 623.40 | 112.8     | 1.60     |
| 624.31 | 0.3       | 0.00     |
| 626.21 | 0.0       | 0.00     |
| 627.59 | 0.3       | 0.00     |
| 628.41 | 2.7       | 0.04     |
| 629.78 | 0.0       | 0.00     |
| 630.42 | 0.0       | 0.00     |
| 631.16 | 0.0       | 0.00     |
| 631.79 | 170.1     | 2.42     |
| 633.56 | 0.0       | 0.00     |
| 634.79 | 113.4     | 1.61     |
| 635.42 | 0.0       | 0.00     |
| 636.28 | 0.0       | 0.00     |
| 636.94 | 0.0       | 0.00     |
| 637.74 | 0.0       | 0.00     |
| 638.46 | 0.0       | 0.00     |
| 639.55 | 8.7       | 0.12     |
| 640.38 | 140.4     | 2.00     |
| 641.92 | 76.1      | 1.08     |
| 642.54 | 86.0      | 1.22     |

Selwan-64#117-121 RT: 0.43-0.44 AV: 5

T: {0,0} + c EI Full ms [50.00-1000.00]

m/z= 50.00-1000.04

| m/z    | Intensity | Relative |
|--------|-----------|----------|
| 643.65 | 0.0       | 0.00     |
| 644.23 | 14.8      | 0.21     |
| 645.33 | 0.0       | 0.00     |
| 646.18 | 154.2     | 2.19     |
| 648.19 | 231.3     | 3.29     |
| 648.93 | 1.0       | 0.01     |
| 649.89 | 0.0       | 0.00     |
| 650.49 | 0.0       | 0.00     |
| 651.00 | 0.0       | 0.00     |
| 652.37 | 0.0       | 0.00     |
| 653.60 | 0.0       | 0.00     |
| 654.79 | 0.0       | 0.00     |
| 656.24 | 0.0       | 0.00     |
| 657.01 | 0.0       | 0.00     |
| 657.70 | 0.0       | 0.00     |
| 658.66 | 0.0       | 0.00     |
| 659.80 | 0.0       | 0.00     |
| 660.89 | 0.0       | 0.00     |
| 661.42 | 0.0       | 0.00     |
| 662.19 | 101.5     | 1.44     |
| 663.52 | 0.0       | 0.00     |
| 664.20 | 0.0       | 0.00     |
| 665.35 | 160.5     | 2.28     |
| 666.43 | 52.4      | 0.75     |
| 667.15 | 0.0       | 0.00     |
| 668.56 | 67.9      | 0.97     |
| 669.89 | 163.9     | 2.33     |
| 671.15 | 0.0       | 0.00     |
| 672.09 | 4.3       | 0.06     |
| 672.90 | 0.0       | 0.00     |
| 673.83 | 0.0       | 0.00     |
| 674.94 | 0.0       | 0.00     |
| 675.56 | 11.1      | 0.16     |
| 676.50 | 0.0       | 0.00     |
| 677.23 | 0.0       | 0.00     |
| 677.74 | 0.0       | 0.00     |
| 679.39 | 106.8     | 1.52     |
| 679.97 | 0.1       | 0.00     |
| 680.63 | 0.0       | 0.00     |
| 681.89 | 0.0       | 0.00     |
| 684.31 | 90.0      | 1.28     |
| 685.05 | 95.3      | 1.36     |
| 686.92 | 0.0       | 0.00     |
| 688.07 | 0.0       | 0.00     |
| 688.94 | 0.0       | 0.00     |
| 690.08 | 0.0       | 0.00     |
| 690.69 | 0.0       | 0.00     |
| 691.50 | 137.4     | 1.95     |
| 692.01 | 0.0       | 0.00     |
| 693.59 | 0.0       | 0.00     |
| 695.55 | 0.0       | 0.00     |
| 696.75 | 274.4     | 3.90     |
| 697.39 | 0.0       | 0.00     |
| 698.32 | 159.5     | 2.27     |
| 698.82 | 0.0       | 0.00     |

Selwan-64#117-121 RT: 0.43-0.44 AV: 5

T: {0,0} + c EI Full ms [50.00-1000.00]

m/z= 50.00-1000.04

| m/z    | Intensity | Relative |
|--------|-----------|----------|
| 699.36 | 0.0       | 0.00     |
| 700.70 | 0.0       | 0.00     |
| 701.25 | 0.0       | 0.00     |
| 702.62 | 0.3       | 0.00     |
| 703.53 | 0.0       | 0.00     |
| 705.25 | 125.4     | 1.78     |
| 706.10 | 0.0       | 0.00     |
| 707.19 | 120.0     | 1.71     |
| 708.02 | 137.0     | 1.95     |
| 709.20 | 275.7     | 3.92     |
| 710.49 | 0.0       | 0.00     |
| 711.85 | 2.6       | 0.04     |
| 713.29 | 0.0       | 0.00     |
| 714.62 | 1.1       | 0.02     |
| 715.56 | 0.0       | 0.00     |
| 717.38 | 0.0       | 0.00     |
| 718.43 | 0.0       | 0.00     |
| 719.15 | 0.0       | 0.00     |
| 719.67 | 0.0       | 0.00     |
| 721.50 | 0.0       | 0.00     |
| 722.44 | 113.7     | 1.62     |
| 723.18 | 11.1      | 0.16     |
| 723.73 | 0.0       | 0.00     |
| 724.68 | 19.8      | 0.28     |
| 725.55 | 0.0       | 0.00     |
| 726.06 | 0.0       | 0.00     |
| 726.57 | 12.3      | 0.17     |
| 727.79 | 0.0       | 0.00     |
| 730.23 | 0.1       | 0.00     |
| 730.96 | 92.8      | 1.32     |
| 732.45 | 80.1      | 1.14     |
| 733.38 | 0.0       | 0.00     |
| 734.74 | 0.0       | 0.00     |
| 735.70 | 123.9     | 1.76     |
| 736.70 | 94.0      | 1.34     |
| 737.21 | 0.0       | 0.00     |
| 738.65 | 0.0       | 0.00     |
| 740.18 | 0.0       | 0.00     |
| 741.22 | 69.5      | 0.99     |
| 744.41 | 0.0       | 0.00     |
| 745.10 | 0.0       | 0.00     |
| 745.94 | 80.8      | 1.15     |
| 746.78 | 135.1     | 1.92     |
| 747.36 | 9.2       | 0.13     |
| 748.23 | 74.9      | 1.07     |
| 749.38 | 234.4     | 3.33     |
| 749.96 | 0.0       | 0.00     |
| 750.46 | 0.0       | 0.00     |
| 751.01 | 0.0       | 0.00     |
| 753.28 | 14.3      | 0.20     |
| 754.79 | 67.9      | 0.97     |
| 755.88 | 0.0       | 0.00     |
| 756.77 | 2.1       | 0.03     |
| 757.69 | 153.7     | 2.19     |
| 759.04 | 93.4      | 1.33     |

Selwan-64#117-121 RT: 0.43-0.44 AV: 5

T: {0,0} + c EI Full ms [50.00-1000.00]

m/z= 50.00-1000.04

| m/z    | Intensity | Relative |
|--------|-----------|----------|
| 761.30 | 258.6     | 3.68     |
| 761.89 | 0.0       | 0.00     |
| 762.58 | 0.0       | 0.00     |
| 763.13 | 2.0       | 0.03     |
| 763.99 | 7.5       | 0.11     |
| 765.11 | 0.0       | 0.00     |
| 766.71 | 0.0       | 0.00     |
| 767.87 | 0.0       | 0.00     |
| 769.59 | 0.0       | 0.00     |
| 770.77 | 0.3       | 0.00     |
| 772.15 | 0.0       | 0.00     |
| 772.69 | 0.0       | 0.00     |
| 773.19 | 0.0       | 0.00     |
| 774.55 | 0.0       | 0.00     |
| 775.42 | 0.0       | 0.00     |
| 776.41 | 12.6      | 0.18     |
| 777.38 | 113.4     | 1.61     |
| 778.11 | 0.0       | 0.00     |
| 778.66 | 0.0       | 0.00     |
| 780.30 | 0.0       | 0.00     |
| 781.93 | 0.0       | 0.00     |
| 782.74 | 0.0       | 0.00     |
| 784.06 | 0.0       | 0.00     |
| 785.13 | 0.0       | 0.00     |
| 786.19 | 0.0       | 0.00     |
| 787.09 | 0.0       | 0.00     |
| 788.83 | 0.0       | 0.00     |
| 790.46 | 0.0       | 0.00     |
| 791.12 | 14.6      | 0.21     |
| 792.44 | 0.0       | 0.00     |
| 794.17 | 17.0      | 0.24     |
| 795.60 | 0.0       | 0.00     |
| 796.81 | 12.7      | 0.18     |
| 797.41 | 0.0       | 0.00     |
| 798.54 | 0.0       | 0.00     |
| 799.29 | 0.0       | 0.00     |
| 800.07 | 0.0       | 0.00     |
| 801.30 | 0.0       | 0.00     |
| 802.15 | 0.0       | 0.00     |
| 802.93 | 246.7     | 3.51     |
| 803.99 | 0.0       | 0.00     |
| 805.14 | 164.9     | 2.34     |
| 806.13 | 9.2       | 0.13     |
| 806.85 | 0.0       | 0.00     |
| 808.13 | 114.4     | 1.63     |
| 808.94 | 0.0       | 0.00     |
| 809.52 | 0.0       | 0.00     |
| 810.91 | 0.0       | 0.00     |
| 811.74 | 67.9      | 0.97     |
| 812.37 | 67.1      | 0.95     |
| 813.78 | 79.2      | 1.13     |
| 814.61 | 0.0       | 0.00     |
| 815.50 | 9.2       | 0.13     |
| 816.08 | 2.8       | 0.04     |
| 816.64 | 0.0       | 0.00     |



Selwan-64#117-121 RT: 0.43-0.44 AV: 5

T: {0,0} + c EI Full ms [50.00-1000.00]

m/z= 50.00-1000.04

| m/z    | Intensity | Relative |
|--------|-----------|----------|
| 817.95 | 0.0       | 0.00     |
| 819.27 | 0.0       | 0.00     |
| 820.58 | 26.7      | 0.38     |
| 822.77 | 0.0       | 0.00     |
| 823.70 | 2.7       | 0.04     |
| 825.30 | 0.0       | 0.00     |
| 826.93 | 117.7     | 1.67     |
| 828.05 | 106.8     | 1.52     |
| 828.70 | 0.0       | 0.00     |
| 829.97 | 0.0       | 0.00     |
| 830.98 | 0.0       | 0.00     |
| 831.90 | 0.0       | 0.00     |
| 832.42 | 0.0       | 0.00     |
| 834.46 | 59.7      | 0.85     |
| 835.14 | 0.0       | 0.00     |
| 836.22 | 2.2       | 0.03     |
| 838.37 | 0.0       | 0.00     |
| 839.01 | 0.0       | 0.00     |
| 839.55 | 0.0       | 0.00     |
| 840.15 | 0.0       | 0.00     |
| 840.82 | 0.0       | 0.00     |
| 841.57 | 115.2     | 1.64     |
| 842.35 | 138.0     | 1.96     |
| 843.37 | 10.8      | 0.15     |
| 844.29 | 0.0       | 0.00     |
| 846.87 | 0.0       | 0.00     |
| 847.55 | 0.0       | 0.00     |
| 848.06 | 4.9       | 0.07     |
| 849.53 | 0.0       | 0.00     |
| 850.31 | 0.0       | 0.00     |
| 852.42 | 157.5     | 2.24     |
| 853.52 | 0.0       | 0.00     |
| 854.21 | 91.6      | 1.30     |
| 855.22 | 55.7      | 0.79     |
| 855.94 | 0.0       | 0.00     |
| 856.67 | 0.0       | 0.00     |
| 857.18 | 133.8     | 1.90     |
| 858.87 | 0.0       | 0.00     |
| 859.87 | 0.0       | 0.00     |
| 860.41 | 0.0       | 0.00     |
| 861.32 | 225.2     | 3.20     |
| 862.31 | 0.0       | 0.00     |
| 863.63 | 0.0       | 0.00     |
| 864.38 | 0.0       | 0.00     |
| 865.26 | 0.0       | 0.00     |
| 867.05 | 0.0       | 0.00     |
| 868.13 | 31.4      | 0.45     |
| 868.88 | 0.0       | 0.00     |
| 869.46 | 0.0       | 0.00     |
| 870.85 | 134.8     | 1.92     |
| 871.46 | 139.8     | 1.99     |
| 872.07 | 0.0       | 0.00     |
| 872.78 | 68.5      | 0.97     |
| 874.19 | 0.0       | 0.00     |
| 876.05 | 0.0       | 0.00     |

Selwan-64#117-121 RT: 0.43-0.44 AV: 5

T: {0,0} + c EI Full ms [50.00-1000.00]

m/z= 50.00-1000.04

| m/z    | Intensity | Relative |
|--------|-----------|----------|
| 877.04 | 0.5       | 0.01     |
| 878.24 | 136.1     | 1.94     |
| 880.43 | 122.4     | 1.74     |
| 881.77 | 206.5     | 2.94     |
| 882.75 | 116.9     | 1.66     |
| 884.35 | 0.0       | 0.00     |
| 884.93 | 11.0      | 0.16     |
| 886.10 | 0.0       | 0.00     |
| 886.96 | 191.2     | 2.72     |
| 888.34 | 21.3      | 0.30     |
| 889.42 | 0.0       | 0.00     |
| 890.01 | 0.0       | 0.00     |
| 890.88 | 0.0       | 0.00     |
| 891.77 | 0.0       | 0.00     |
| 893.71 | 325.6     | 4.63     |
| 894.30 | 0.1       | 0.00     |
| 895.76 | 73.6      | 1.05     |
| 896.32 | 0.0       | 0.00     |
| 896.92 | 71.4      | 1.02     |
| 898.05 | 41.4      | 0.59     |
| 898.73 | 0.0       | 0.00     |
| 901.37 | 0.0       | 0.00     |
| 902.13 | 192.6     | 2.74     |
| 903.32 | 0.0       | 0.00     |
| 904.22 | 0.0       | 0.00     |
| 904.86 | 52.1      | 0.74     |
| 905.59 | 137.2     | 1.95     |
| 906.54 | 113.2     | 1.61     |
| 907.53 | 86.0      | 1.22     |
| 908.22 | 0.0       | 0.00     |
| 908.92 | 75.2      | 1.07     |
| 910.04 | 42.0      | 0.60     |
| 911.81 | 0.0       | 0.00     |
| 912.44 | 0.0       | 0.00     |
| 913.12 | 0.0       | 0.00     |
| 913.84 | 0.0       | 0.00     |
| 914.40 | 0.0       | 0.00     |
| 915.27 | 0.0       | 0.00     |
| 916.22 | 0.0       | 0.00     |
| 917.34 | 0.0       | 0.00     |
| 917.99 | 0.0       | 0.00     |
| 919.52 | 0.0       | 0.00     |
| 920.15 | 0.0       | 0.00     |
| 921.01 | 0.0       | 0.00     |
| 921.55 | 0.0       | 0.00     |
| 922.14 | 0.0       | 0.00     |
| 923.71 | 0.5       | 0.01     |
| 926.40 | 132.9     | 1.89     |
| 927.10 | 0.0       | 0.00     |
| 928.84 | 21.6      | 0.31     |
| 929.50 | 115.8     | 1.65     |
| 930.08 | 3.4       | 0.05     |
| 931.12 | 0.0       | 0.00     |
| 932.73 | 0.0       | 0.00     |
| 933.84 | 7.5       | 0.11     |

Selwan-64#117-121 RT: 0.43-0.44 AV: 5

T: {0,0} + c EI Full ms [50.00-1000.00]

m/z= 50.00-1000.04

| m/z    | Intensity | Relative |
|--------|-----------|----------|
| 934.80 | 101.5     | 1.44     |
| 935.49 | 11.1      | 0.16     |
| 936.54 | 2.2       | 0.03     |
| 937.26 | 0.0       | 0.00     |
| 938.70 | 2.0       | 0.03     |
| 939.68 | 0.0       | 0.00     |
| 940.27 | 0.0       | 0.00     |
| 940.80 | 0.0       | 0.00     |
| 941.85 | 62.2      | 0.88     |
| 942.35 | 0.0       | 0.00     |
| 944.30 | 0.4       | 0.01     |
| 944.84 | 0.0       | 0.00     |
| 945.34 | 115.0     | 1.64     |
| 947.16 | 0.0       | 0.00     |
| 948.72 | 0.0       | 0.00     |
| 949.58 | 0.0       | 0.00     |
| 950.35 | 0.0       | 0.00     |
| 951.19 | 0.0       | 0.00     |
| 951.84 | 9.5       | 0.14     |
| 952.50 | 0.0       | 0.00     |
| 953.58 | 11.0      | 0.16     |
| 954.09 | 0.0       | 0.00     |
| 955.79 | 0.0       | 0.00     |
| 957.02 | 0.3       | 0.00     |
| 958.50 | 0.0       | 0.00     |
| 959.17 | 9.0       | 0.13     |
| 959.80 | 0.0       | 0.00     |
| 960.45 | 53.6      | 0.76     |
| 961.43 | 0.0       | 0.00     |
| 962.84 | 18.5      | 0.26     |
| 963.63 | 173.7     | 2.47     |
| 964.62 | 0.0       | 0.00     |
| 965.76 | 11.2      | 0.16     |
| 966.55 | 0.0       | 0.00     |
| 967.36 | 0.0       | 0.00     |
| 967.96 | 10.9      | 0.16     |
| 968.53 | 0.0       | 0.00     |
| 969.10 | 0.0       | 0.00     |
| 970.57 | 0.0       | 0.00     |
| 971.60 | 0.0       | 0.00     |
| 972.43 | 0.0       | 0.00     |
| 973.00 | 0.0       | 0.00     |
| 973.70 | 0.0       | 0.00     |
| 975.00 | 0.0       | 0.00     |
| 976.35 | 0.0       | 0.00     |
| 977.41 | 0.0       | 0.00     |
| 979.01 | 0.0       | 0.00     |
| 979.85 | 0.0       | 0.00     |
| 980.75 | 0.3       | 0.00     |
| 981.33 | 0.0       | 0.00     |
| 982.37 | 0.0       | 0.00     |
| 982.93 | 0.0       | 0.00     |
| 984.02 | 93.4      | 1.33     |
| 985.11 | 0.0       | 0.00     |
| 985.87 | 0.0       | 0.00     |

Selwan-64#117-121 RT: 0.43-0.44 AV: 5

T: {0,0} + c EI Full ms [50.00-1000.00]

m/z= 50.00-1000.04

| m/z    | Intensity | Relative |
|--------|-----------|----------|
| 986.44 | 0.0       | 0.00     |
| 987.20 | 102.1     | 1.45     |
| 987.74 | 0.1       | 0.00     |
| 989.16 | 0.0       | 0.00     |
| 989.72 | 0.0       | 0.00     |
| 990.25 | 250.5     | 3.56     |
| 991.48 | 252.3     | 3.59     |
| 991.99 | 0.0       | 0.00     |
| 992.86 | 0.0       | 0.00     |
| 993.69 | 113.9     | 1.62     |
| 995.19 | 102.2     | 1.45     |
| 995.89 | 16.9      | 0.24     |
| 997.12 | 41.8      | 0.59     |
| 997.32 | 0.0       | 0.00     |
| 997.95 | 52.2      | 0.74     |
| 998.75 | 112.4     | 1.60     |
| 999.38 | 0.0       | 0.00     |
