# Supplementary material for: A Simple and Efficient Multicomponent Synthesis of Novel Pyrazole, N-aminopyridine and Pyrazolo[3,4-b]Pyridine Derivatives in Water
Source: Preprints.org preprint supplement (doi:10.20944/preprints202312.1232.v1), 2023-12-28
Supplement: Supplementary file 56 [file supplementary]

RT: 0.00 - 4.20

NL:  
1.15E7  
TIC MS  
Hayam-106

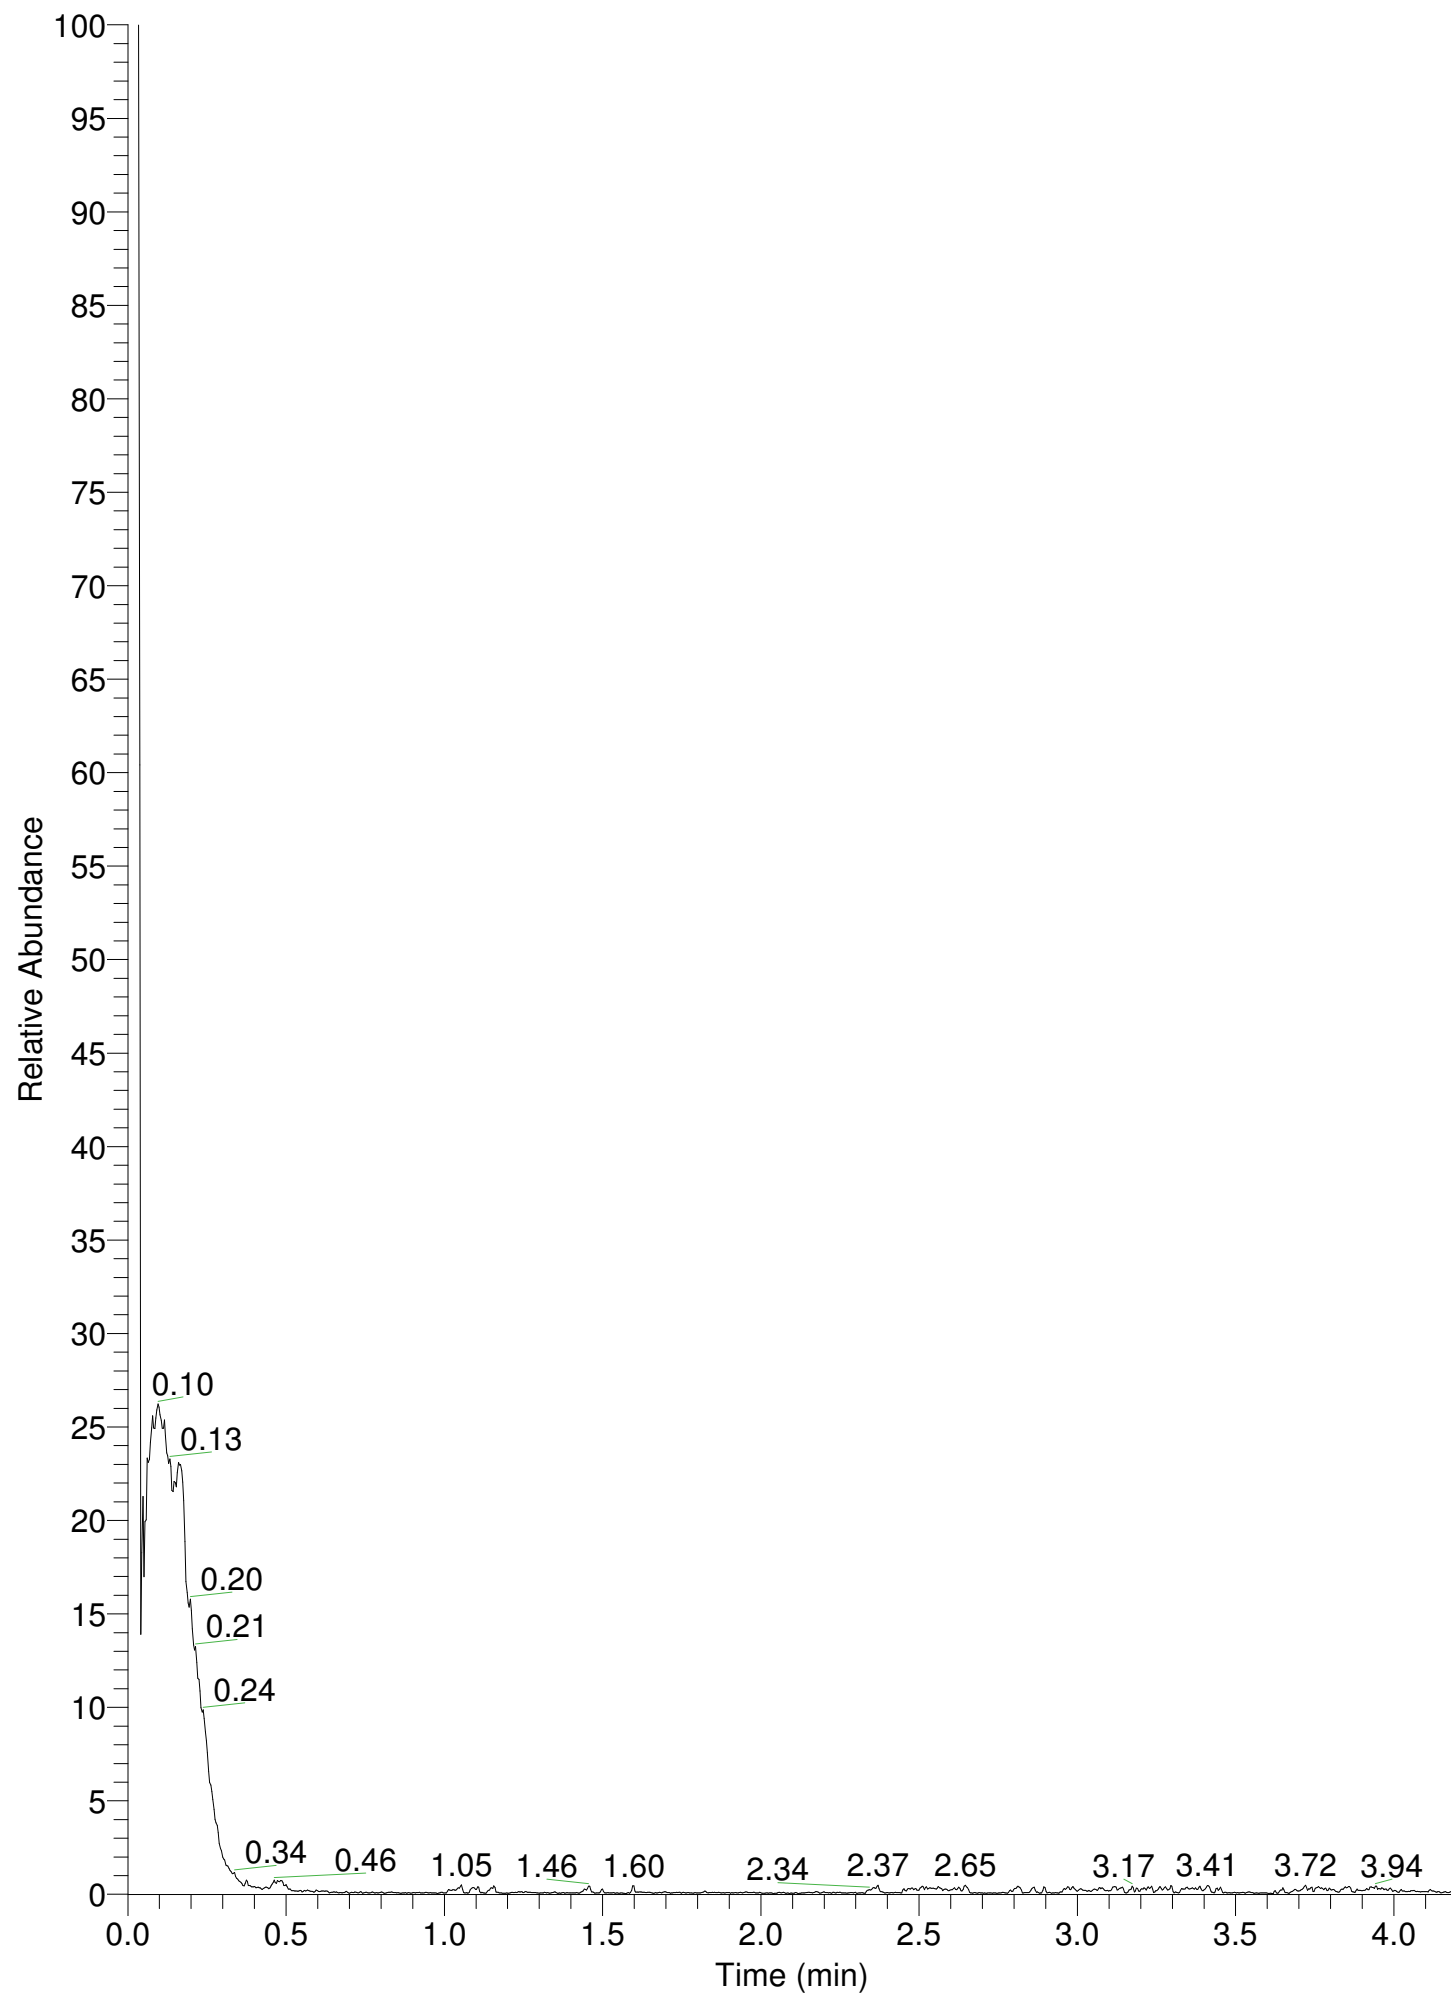

Hayam-106 #33 RT: 0.14 AV: 1 NL: 7.38E5

T: {0,0} + c EI Full ms [50.00-600.00]

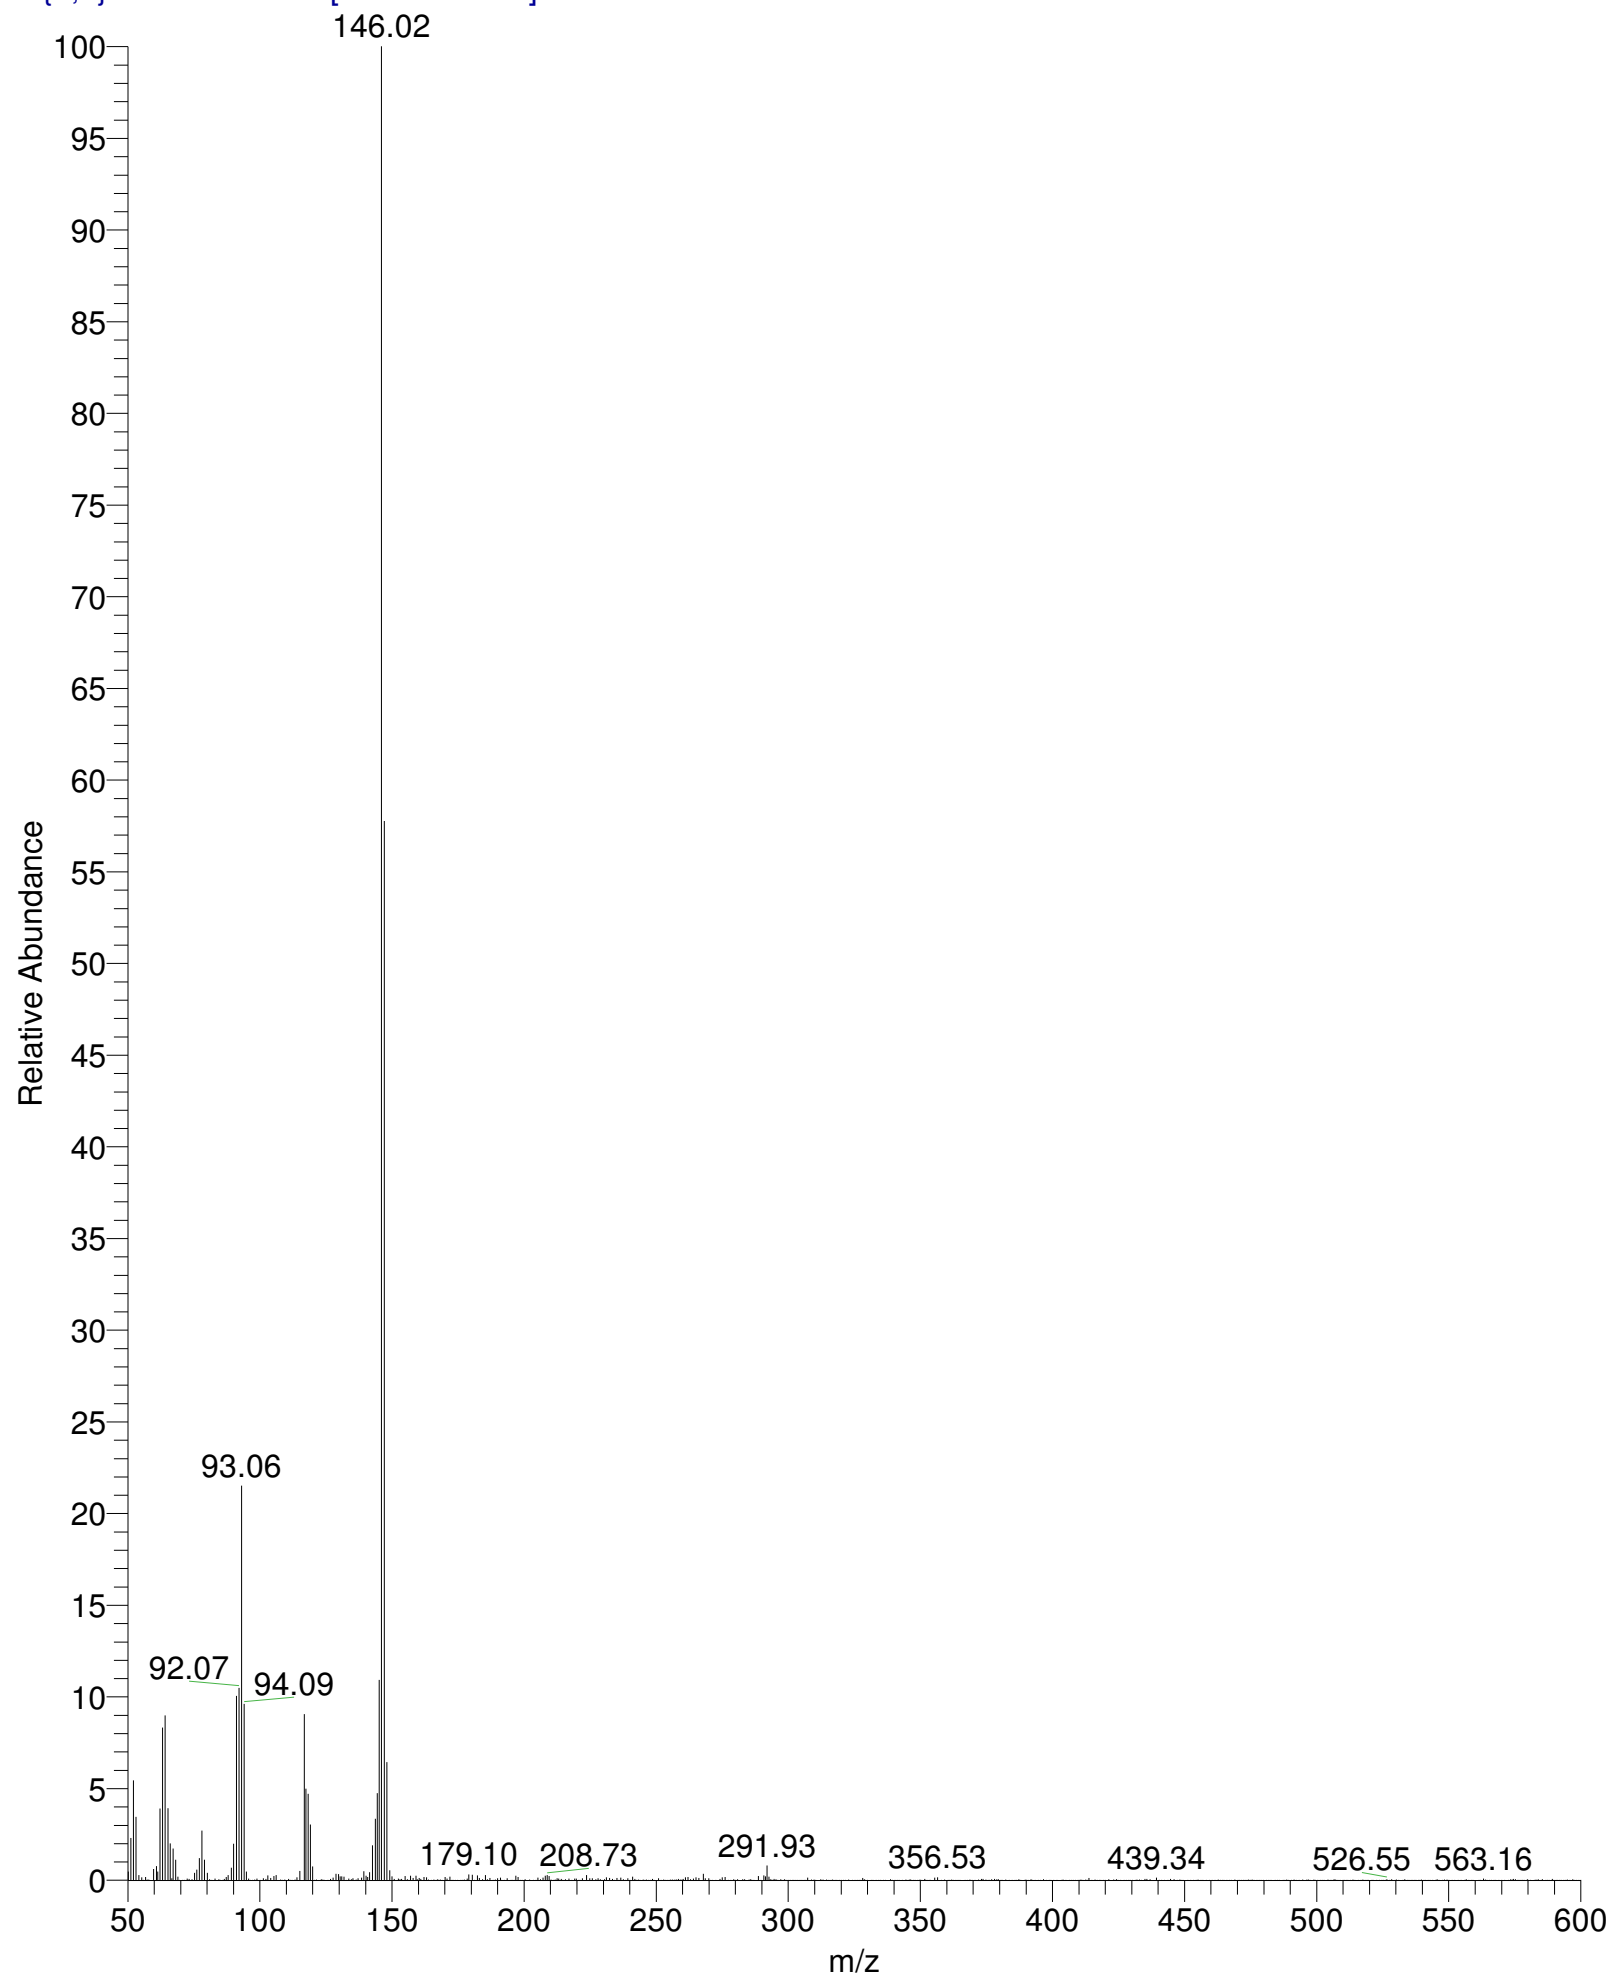

Hayam-106#33 RT: 0.14

T: {0,0} + c EI Full ms [50.00-600.00]

m/z= 50.00-600.02

| m/z   | Intensity | Relative |
|-------|-----------|----------|
| 50.20 | 3461.6    | 0.47     |
| 51.11 | 16909.0   | 2.29     |
| 52.12 | 40123.8   | 5.44     |
| 53.13 | 25427.0   | 3.45     |
| 54.20 | 2008.4    | 0.27     |
| 55.31 | 1138.5    | 0.15     |
| 55.85 | 27.4      | 0.00     |
| 56.67 | 1185.7    | 0.16     |
| 57.31 | 178.6     | 0.02     |
| 57.98 | 209.0     | 0.03     |
| 59.70 | 4420.9    | 0.60     |
| 60.84 | 5623.3    | 0.76     |
| 61.34 | 3372.9    | 0.46     |
| 62.11 | 28779.6   | 3.90     |
| 63.13 | 61359.1   | 8.32     |
| 64.15 | 66188.1   | 8.97     |
| 65.18 | 28881.2   | 3.91     |
| 66.11 | 14684.2   | 1.99     |
| 66.62 | 772.4     | 0.10     |
| 67.13 | 12638.2   | 1.71     |
| 68.12 | 8146.9    | 1.10     |
| 68.90 | 1338.8    | 0.18     |
| 69.62 | 46.9      | 0.01     |
| 70.75 | 0.2       | 0.00     |
| 71.55 | 0.0       | 0.00     |
| 72.52 | 597.6     | 0.08     |
| 73.14 | 504.7     | 0.07     |
| 74.23 | 283.9     | 0.04     |
| 75.24 | 2932.6    | 0.40     |
| 76.11 | 4127.3    | 0.56     |
| 77.10 | 8835.8    | 1.20     |
| 78.07 | 19878.5   | 2.69     |
| 79.05 | 8234.1    | 1.12     |
| 80.06 | 2899.7    | 0.39     |
| 80.95 | 325.1     | 0.04     |
| 81.74 | 26.1      | 0.00     |
| 83.01 | 522.3     | 0.07     |
| 84.51 | 281.8     | 0.04     |
| 85.03 | 2.6       | 0.00     |
| 85.94 | 3.9       | 0.00     |
| 86.51 | 487.9     | 0.07     |
| 87.30 | 1239.0    | 0.17     |
| 88.03 | 1981.3    | 0.27     |
| 89.22 | 4975.2    | 0.67     |
| 89.97 | 14575.8   | 1.98     |
| 91.08 | 74059.4   | 10.04    |
| 92.07 | 77335.9   | 10.48    |
| 93.06 | 158628.3  | 21.50    |
| 94.09 | 70838.0   | 9.60     |
| 94.93 | 3427.0    | 0.46     |
| 95.76 | 641.5     | 0.09     |
| 96.29 | 24.1      | 0.00     |
| 97.19 | 0.3       | 0.00     |
| 98.05 | 191.0     | 0.03     |
| 98.85 | 560.6     | 0.08     |

Hayam-106#33 RT: 0.14

T: {0,0} + c EI Full ms [50.00-600.00]

m/z= 50.00-600.02

| m/z    | Intensity | Relative |
|--------|-----------|----------|
| 100.04 | 15.9      | 0.00     |
| 101.25 | 719.3     | 0.10     |
| 102.26 | 491.2     | 0.07     |
| 102.94 | 1890.0    | 0.26     |
| 104.08 | 860.1     | 0.12     |
| 105.34 | 1641.8    | 0.22     |
| 106.09 | 2010.5    | 0.27     |
| 107.88 | 205.7     | 0.03     |
| 108.53 | 0.1       | 0.00     |
| 109.36 | 228.9     | 0.03     |
| 110.82 | 471.2     | 0.06     |
| 111.62 | 0.3       | 0.00     |
| 112.16 | 11.9      | 0.00     |
| 113.29 | 235.8     | 0.03     |
| 113.98 | 1049.4    | 0.14     |
| 115.12 | 3717.6    | 0.50     |
| 116.81 | 66789.3   | 9.05     |
| 117.46 | 36780.0   | 4.99     |
| 118.21 | 34693.9   | 4.70     |
| 119.13 | 22391.3   | 3.04     |
| 119.99 | 5435.5    | 0.74     |
| 120.62 | 43.4      | 0.01     |
| 121.39 | 182.9     | 0.02     |
| 123.28 | 383.5     | 0.05     |
| 123.81 | 208.6     | 0.03     |
| 124.37 | 0.0       | 0.00     |
| 125.78 | 80.8      | 0.01     |
| 126.78 | 481.9     | 0.07     |
| 127.69 | 944.7     | 0.13     |
| 128.79 | 2525.7    | 0.34     |
| 129.76 | 2418.9    | 0.33     |
| 130.32 | 1490.0    | 0.20     |
| 131.02 | 1467.9    | 0.20     |
| 131.85 | 1291.7    | 0.18     |
| 132.62 | 0.1       | 0.00     |
| 133.67 | 601.6     | 0.08     |
| 134.60 | 282.7     | 0.04     |
| 135.23 | 701.2     | 0.10     |
| 136.37 | 142.4     | 0.02     |
| 137.11 | 748.2     | 0.10     |
| 138.44 | 1006.4    | 0.14     |
| 139.36 | 3499.1    | 0.47     |
| 140.14 | 1757.3    | 0.24     |
| 140.80 | 1191.1    | 0.16     |
| 141.55 | 3152.0    | 0.43     |
| 142.57 | 14025.8   | 1.90     |
| 143.66 | 24650.3   | 3.34     |
| 144.47 | 34901.9   | 4.73     |
| 145.09 | 80515.7   | 10.91    |
| 146.02 | 737745.9  | 100.00   |
| 147.05 | 426111.3  | 57.76    |
| 148.05 | 47400.6   | 6.43     |
| 149.12 | 3864.8    | 0.52     |
| 149.99 | 1504.2    | 0.20     |
| 150.88 | 433.5     | 0.06     |

Hayam-106#33 RT: 0.14

T: {0,0} + c EI Full ms [50.00-600.00]

m/z= 50.00-600.02

| m/z    | Intensity | Relative |
|--------|-----------|----------|
| 152.40 | 561.6     | 0.08     |
| 153.02 | 338.4     | 0.05     |
| 153.66 | 448.7     | 0.06     |
| 154.97 | 1648.4    | 0.22     |
| 155.85 | 385.2     | 0.05     |
| 156.41 | 112.6     | 0.02     |
| 156.96 | 1747.1    | 0.24     |
| 158.02 | 824.4     | 0.11     |
| 159.04 | 1685.2    | 0.23     |
| 159.56 | 322.9     | 0.04     |
| 160.34 | 785.3     | 0.11     |
| 160.95 | 419.6     | 0.06     |
| 162.10 | 1249.5    | 0.17     |
| 163.10 | 1128.6    | 0.15     |
| 163.83 | 170.3     | 0.02     |
| 164.93 | 26.0      | 0.00     |
| 165.85 | 139.8     | 0.02     |
| 166.66 | 40.2      | 0.01     |
| 167.32 | 263.5     | 0.04     |
| 168.24 | 197.9     | 0.03     |
| 169.00 | 15.4      | 0.00     |
| 170.06 | 1245.1    | 0.17     |
| 170.77 | 569.0     | 0.08     |
| 171.94 | 1314.3    | 0.18     |
| 172.61 | 28.0      | 0.00     |
| 173.14 | 10.5      | 0.00     |
| 173.99 | 9.4       | 0.00     |
| 174.84 | 0.1       | 0.00     |
| 176.00 | 9.6       | 0.00     |
| 176.69 | 11.4      | 0.00     |
| 177.39 | 214.1     | 0.03     |
| 178.41 | 602.2     | 0.08     |
| 179.10 | 2201.7    | 0.30     |
| 180.44 | 2095.0    | 0.28     |
| 181.25 | 1.6       | 0.00     |
| 182.33 | 1905.6    | 0.26     |
| 183.02 | 858.8     | 0.12     |
| 184.25 | 319.4     | 0.04     |
| 185.30 | 1933.2    | 0.26     |
| 186.14 | 377.0     | 0.05     |
| 187.07 | 821.1     | 0.11     |
| 188.29 | 0.4       | 0.00     |
| 189.13 | 133.5     | 0.02     |
| 189.94 | 677.9     | 0.09     |
| 191.03 | 965.2     | 0.13     |
| 191.55 | 14.7      | 0.00     |
| 192.48 | 0.0       | 0.00     |
| 193.62 | 763.3     | 0.10     |
| 195.05 | 0.3       | 0.00     |
| 195.56 | 0.1       | 0.00     |
| 196.29 | 10.6      | 0.00     |
| 196.92 | 1694.3    | 0.23     |
| 197.75 | 1231.5    | 0.17     |
| 198.54 | 104.7     | 0.01     |
| 199.23 | 0.0       | 0.00     |

Hayam-106#33 RT: 0.14

T: {0,0} + c EI Full ms [50.00-600.00]

m/z= 50.00-600.02

| m/z    | Intensity | Relative |
|--------|-----------|----------|
| 200.42 | 281.5     | 0.04     |
| 202.10 | 191.1     | 0.03     |
| 203.58 | 20.6      | 0.00     |
| 204.51 | 0.0       | 0.00     |
| 205.21 | 923.8     | 0.13     |
| 206.20 | 329.5     | 0.04     |
| 207.18 | 1021.3    | 0.14     |
| 207.96 | 1723.1    | 0.23     |
| 208.73 | 1972.3    | 0.27     |
| 209.42 | 1657.9    | 0.22     |
| 210.16 | 152.9     | 0.02     |
| 211.00 | 0.6       | 0.00     |
| 211.82 | 254.5     | 0.03     |
| 212.46 | 697.5     | 0.09     |
| 213.14 | 596.6     | 0.08     |
| 214.02 | 513.0     | 0.07     |
| 214.68 | 6.5       | 0.00     |
| 215.68 | 271.0     | 0.04     |
| 216.91 | 641.0     | 0.09     |
| 218.02 | 0.0       | 0.00     |
| 219.10 | 523.7     | 0.07     |
| 219.78 | 610.9     | 0.08     |
| 220.68 | 9.6       | 0.00     |
| 221.24 | 0.2       | 0.00     |
| 222.10 | 723.8     | 0.10     |
| 223.61 | 1943.2    | 0.26     |
| 224.83 | 685.7     | 0.09     |
| 225.84 | 735.9     | 0.10     |
| 227.14 | 305.2     | 0.04     |
| 227.97 | 668.9     | 0.09     |
| 228.78 | 381.1     | 0.05     |
| 229.53 | 89.6      | 0.01     |
| 230.40 | 307.6     | 0.04     |
| 231.18 | 1126.5    | 0.15     |
| 232.33 | 837.1     | 0.11     |
| 233.47 | 437.3     | 0.06     |
| 234.17 | 10.4      | 0.00     |
| 235.16 | 808.0     | 0.11     |
| 235.86 | 100.8     | 0.01     |
| 236.64 | 988.0     | 0.13     |
| 237.60 | 323.6     | 0.04     |
| 238.46 | 6.0       | 0.00     |
| 239.23 | 687.6     | 0.09     |
| 240.09 | 28.9      | 0.00     |
| 241.10 | 1346.2    | 0.18     |
| 241.97 | 499.6     | 0.07     |
| 242.56 | 0.1       | 0.00     |
| 243.29 | 187.4     | 0.03     |
| 243.85 | 0.0       | 0.00     |
| 245.06 | 230.2     | 0.03     |
| 245.64 | 116.9     | 0.02     |
| 246.29 | 167.7     | 0.02     |
| 247.08 | 0.4       | 0.00     |
| 247.82 | 0.4       | 0.00     |
| 248.54 | 412.7     | 0.06     |

Hayam-106#33 RT: 0.14

T: {0,0} + c EI Full ms [50.00-600.00]

m/z= 50.00-600.02

| m/z    | Intensity | Relative |
|--------|-----------|----------|
| 249.19 | 12.5      | 0.00     |
| 250.86 | 655.4     | 0.09     |
| 251.85 | 30.5      | 0.00     |
| 252.82 | 183.5     | 0.02     |
| 253.46 | 11.3      | 0.00     |
| 254.17 | 9.6       | 0.00     |
| 254.92 | 1.4       | 0.00     |
| 255.44 | 229.6     | 0.03     |
| 256.17 | 208.3     | 0.03     |
| 257.10 | 173.6     | 0.02     |
| 257.72 | 177.7     | 0.02     |
| 258.44 | 481.9     | 0.07     |
| 259.06 | 195.4     | 0.03     |
| 259.75 | 206.2     | 0.03     |
| 260.26 | 455.3     | 0.06     |
| 261.04 | 1100.1    | 0.15     |
| 261.99 | 1242.9    | 0.17     |
| 263.05 | 272.8     | 0.04     |
| 264.06 | 628.3     | 0.09     |
| 265.07 | 1085.0    | 0.15     |
| 266.19 | 800.7     | 0.11     |
| 267.84 | 2548.2    | 0.35     |
| 268.53 | 717.6     | 0.10     |
| 269.85 | 647.7     | 0.09     |
| 270.38 | 3.3       | 0.00     |
| 271.20 | 0.1       | 0.00     |
| 272.61 | 0.3       | 0.00     |
| 274.16 | 450.3     | 0.06     |
| 275.01 | 1100.6    | 0.15     |
| 276.04 | 1262.0    | 0.17     |
| 277.30 | 63.6      | 0.01     |
| 278.31 | 0.4       | 0.00     |
| 279.40 | 360.9     | 0.05     |
| 280.10 | 2.1       | 0.00     |
| 280.74 | 305.2     | 0.04     |
| 282.77 | 277.9     | 0.04     |
| 283.49 | 302.3     | 0.04     |
| 285.22 | 235.1     | 0.03     |
| 285.73 | 374.8     | 0.05     |
| 286.25 | 32.0      | 0.00     |
| 287.03 | 0.2       | 0.00     |
| 288.64 | 1636.8    | 0.22     |
| 289.66 | 25.0      | 0.00     |
| 290.77 | 1882.6    | 0.26     |
| 291.35 | 1477.6    | 0.20     |
| 291.93 | 5839.1    | 0.79     |
| 292.62 | 1338.9    | 0.18     |
| 293.22 | 328.3     | 0.04     |
| 293.80 | 193.3     | 0.03     |
| 294.65 | 427.2     | 0.06     |
| 295.34 | 382.9     | 0.05     |
| 296.06 | 25.6      | 0.00     |
| 297.19 | 336.7     | 0.05     |
| 297.94 | 81.8      | 0.01     |
| 298.63 | 321.6     | 0.04     |

Hayam-106#33 RT: 0.14

T: {0,0} + c EI Full ms [50.00-600.00]

m/z= 50.00-600.02

| m/z    | Intensity | Relative |
|--------|-----------|----------|
| 299.43 | 43.8      | 0.01     |
| 300.24 | 37.2      | 0.01     |
| 300.81 | 7.2       | 0.00     |
| 301.62 | 55.7      | 0.01     |
| 302.17 | 0.1       | 0.00     |
| 302.90 | 1.5       | 0.00     |
| 303.58 | 0.0       | 0.00     |
| 304.48 | 0.0       | 0.00     |
| 305.10 | 0.1       | 0.00     |
| 306.02 | 0.0       | 0.00     |
| 306.58 | 12.9      | 0.00     |
| 307.32 | 966.0     | 0.13     |
| 308.78 | 254.5     | 0.03     |
| 309.72 | 204.2     | 0.03     |
| 310.33 | 0.1       | 0.00     |
| 312.27 | 265.9     | 0.04     |
| 313.15 | 208.2     | 0.03     |
| 314.43 | 188.3     | 0.03     |
| 315.27 | 0.1       | 0.00     |
| 316.18 | 0.0       | 0.00     |
| 316.74 | 164.9     | 0.02     |
| 317.72 | 53.0      | 0.01     |
| 318.35 | 0.0       | 0.00     |
| 319.26 | 10.7      | 0.00     |
| 320.08 | 0.2       | 0.00     |
| 320.95 | 1.4       | 0.00     |
| 321.58 | 0.2       | 0.00     |
| 322.82 | 221.0     | 0.03     |
| 324.31 | 2.7       | 0.00     |
| 325.24 | 15.4      | 0.00     |
| 326.06 | 0.0       | 0.00     |
| 326.84 | 0.0       | 0.00     |
| 327.43 | 0.0       | 0.00     |
| 328.19 | 866.9     | 0.12     |
| 328.76 | 260.5     | 0.04     |
| 329.29 | 0.0       | 0.00     |
| 330.01 | 0.0       | 0.00     |
| 331.41 | 0.2       | 0.00     |
| 331.99 | 0.9       | 0.00     |
| 333.22 | 0.2       | 0.00     |
| 334.24 | 1.3       | 0.00     |
| 334.95 | 10.7      | 0.00     |
| 336.06 | 40.4      | 0.01     |
| 336.80 | 0.0       | 0.00     |
| 338.74 | 287.9     | 0.04     |
| 339.46 | 0.4       | 0.00     |
| 340.37 | 0.3       | 0.00     |
| 341.23 | 0.0       | 0.00     |
| 341.96 | 18.8      | 0.00     |
| 343.19 | 0.5       | 0.00     |
| 344.48 | 212.9     | 0.03     |
| 345.41 | 8.5       | 0.00     |
| 346.11 | 272.6     | 0.04     |
| 346.72 | 0.3       | 0.00     |
| 347.37 | 0.1       | 0.00     |



Hayam-106#33 RT: 0.14

T: {0,0} + c EI Full ms [50.00-600.00]

m/z= 50.00-600.02

| m/z    | Intensity | Relative |
|--------|-----------|----------|
| 347.98 | 1.8       | 0.00     |
| 348.99 | 0.3       | 0.00     |
| 349.90 | 153.5     | 0.02     |
| 350.55 | 0.0       | 0.00     |
| 351.66 | 440.3     | 0.06     |
| 352.56 | 0.0       | 0.00     |
| 353.32 | 12.0      | 0.00     |
| 353.90 | 0.0       | 0.00     |
| 355.39 | 944.6     | 0.13     |
| 356.53 | 1098.6    | 0.15     |
| 358.00 | 0.0       | 0.00     |
| 359.12 | 211.4     | 0.03     |
| 360.52 | 15.2      | 0.00     |
| 361.12 | 112.0     | 0.02     |
| 361.87 | 214.3     | 0.03     |
| 362.51 | 0.3       | 0.00     |
| 363.35 | 0.0       | 0.00     |
| 364.30 | 8.2       | 0.00     |
| 364.96 | 76.8      | 0.01     |
| 366.95 | 0.5       | 0.00     |
| 367.80 | 24.3      | 0.00     |
| 368.79 | 185.1     | 0.03     |
| 369.53 | 0.0       | 0.00     |
| 370.63 | 20.8      | 0.00     |
| 371.99 | 178.6     | 0.02     |
| 373.04 | 407.9     | 0.06     |
| 373.72 | 404.5     | 0.05     |
| 374.77 | 229.7     | 0.03     |
| 375.59 | 1.1       | 0.00     |
| 376.17 | 0.0       | 0.00     |
| 377.03 | 304.7     | 0.04     |
| 378.04 | 388.1     | 0.05     |
| 378.89 | 350.2     | 0.05     |
| 379.56 | 337.8     | 0.05     |
| 380.47 | 0.0       | 0.00     |
| 381.02 | 33.4      | 0.00     |
| 382.28 | 147.7     | 0.02     |
| 383.65 | 22.5      | 0.00     |
| 384.75 | 12.2      | 0.00     |
| 385.86 | 0.1       | 0.00     |
| 386.42 | 0.0       | 0.00     |
| 387.26 | 279.9     | 0.04     |
| 387.98 | 9.7       | 0.00     |
| 389.45 | 0.0       | 0.00     |
| 389.97 | 251.2     | 0.03     |
| 390.80 | 0.3       | 0.00     |
| 391.91 | 289.4     | 0.04     |
| 392.44 | 0.0       | 0.00     |
| 393.48 | 23.9      | 0.00     |
| 394.70 | 0.2       | 0.00     |
| 395.45 | 6.3       | 0.00     |
| 396.64 | 265.2     | 0.04     |
| 397.63 | 16.9      | 0.00     |
| 398.76 | 0.1       | 0.00     |
| 399.40 | 0.0       | 0.00     |

Hayam-106#33 RT: 0.14

T: {0,0} + c EI Full ms [50.00-600.00]

m/z= 50.00-600.02

| m/z    | Intensity | Relative |
|--------|-----------|----------|
| 400.43 | 8.9       | 0.00     |
| 401.73 | 22.0      | 0.00     |
| 403.37 | 42.1      | 0.01     |
| 403.96 | 243.7     | 0.03     |
| 405.09 | 8.3       | 0.00     |
| 406.45 | 0.0       | 0.00     |
| 407.17 | 0.0       | 0.00     |
| 407.80 | 0.2       | 0.00     |
| 408.67 | 0.0       | 0.00     |
| 409.63 | 0.1       | 0.00     |
| 410.15 | 0.0       | 0.00     |
| 410.81 | 162.1     | 0.02     |
| 411.44 | 0.0       | 0.00     |
| 412.57 | 178.9     | 0.02     |
| 413.26 | 0.0       | 0.00     |
| 413.85 | 785.6     | 0.11     |
| 414.89 | 0.0       | 0.00     |
| 416.06 | 247.7     | 0.03     |
| 416.94 | 0.2       | 0.00     |
| 417.74 | 0.0       | 0.00     |
| 418.27 | 0.0       | 0.00     |
| 419.20 | 0.1       | 0.00     |
| 419.99 | 0.2       | 0.00     |
| 421.30 | 306.4     | 0.04     |
| 423.13 | 163.4     | 0.02     |
| 423.67 | 0.0       | 0.00     |
| 424.18 | 325.1     | 0.04     |
| 424.78 | 0.0       | 0.00     |
| 425.77 | 0.0       | 0.00     |
| 427.09 | 23.3      | 0.00     |
| 427.99 | 33.7      | 0.00     |
| 428.80 | 0.0       | 0.00     |
| 429.46 | 0.1       | 0.00     |
| 430.31 | 1.2       | 0.00     |
| 431.37 | 2.2       | 0.00     |
| 431.98 | 198.4     | 0.03     |
| 432.97 | 213.0     | 0.03     |
| 433.67 | 0.1       | 0.00     |
| 435.05 | 486.6     | 0.07     |
| 435.76 | 389.5     | 0.05     |
| 436.93 | 369.4     | 0.05     |
| 439.34 | 988.3     | 0.13     |
| 440.47 | 0.0       | 0.00     |
| 441.27 | 1.6       | 0.00     |
| 442.37 | 22.8      | 0.00     |
| 443.71 | 0.0       | 0.00     |
| 444.72 | 404.4     | 0.05     |
| 446.03 | 351.6     | 0.05     |
| 447.22 | 1.4       | 0.00     |
| 448.23 | 154.9     | 0.02     |
| 448.73 | 0.0       | 0.00     |
| 449.39 | 0.0       | 0.00     |
| 451.19 | 22.7      | 0.00     |
| 452.27 | 116.5     | 0.02     |
| 453.41 | 20.7      | 0.00     |

Hayam-106#33 RT: 0.14

T: {0,0} + c EI Full ms [50.00-600.00]

m/z= 50.00-600.02

| m/z    | Intensity | Relative |
|--------|-----------|----------|
| 454.38 | 4.0       | 0.00     |
| 455.15 | 189.9     | 0.03     |
| 456.18 | 2.0       | 0.00     |
| 456.92 | 25.0      | 0.00     |
| 458.20 | 0.0       | 0.00     |
| 459.52 | 1.2       | 0.00     |
| 460.49 | 6.5       | 0.00     |
| 461.51 | 0.0       | 0.00     |
| 462.69 | 167.3     | 0.02     |
| 463.55 | 0.1       | 0.00     |
| 464.28 | 0.3       | 0.00     |
| 464.88 | 109.5     | 0.01     |
| 465.99 | 0.5       | 0.00     |
| 466.97 | 0.0       | 0.00     |
| 467.65 | 0.0       | 0.00     |
| 468.98 | 229.3     | 0.03     |
| 470.18 | 45.0      | 0.01     |
| 470.81 | 0.0       | 0.00     |
| 471.57 | 0.1       | 0.00     |
| 472.27 | 0.6       | 0.00     |
| 472.93 | 0.0       | 0.00     |
| 473.59 | 0.1       | 0.00     |
| 474.21 | 190.2     | 0.03     |
| 475.00 | 1.2       | 0.00     |
| 475.52 | 235.3     | 0.03     |
| 476.32 | 0.1       | 0.00     |
| 477.38 | 3.9       | 0.00     |
| 478.24 | 1.3       | 0.00     |
| 478.93 | 6.9       | 0.00     |
| 479.85 | 0.0       | 0.00     |
| 481.03 | 0.1       | 0.00     |
| 481.88 | 11.7      | 0.00     |
| 482.72 | 24.5      | 0.00     |
| 484.34 | 0.3       | 0.00     |
| 485.13 | 0.1       | 0.00     |
| 485.82 | 0.0       | 0.00     |
| 487.36 | 0.0       | 0.00     |
| 487.88 | 0.4       | 0.00     |
| 488.69 | 198.4     | 0.03     |
| 489.43 | 0.0       | 0.00     |
| 490.52 | 0.0       | 0.00     |
| 491.45 | 167.0     | 0.02     |
| 492.26 | 0.0       | 0.00     |
| 493.32 | 0.1       | 0.00     |
| 494.71 | 239.6     | 0.03     |
| 496.28 | 189.9     | 0.03     |
| 496.84 | 182.8     | 0.02     |
| 497.46 | 0.0       | 0.00     |
| 498.93 | 236.8     | 0.03     |
| 499.57 | 0.0       | 0.00     |
| 500.39 | 0.1       | 0.00     |
| 501.35 | 0.0       | 0.00     |
| 502.13 | 21.9      | 0.00     |
| 502.88 | 0.4       | 0.00     |
| 504.28 | 205.1     | 0.03     |

Hayam-106#33 RT: 0.14

T: {0,0} + c EI Full ms [50.00-600.00]

m/z= 50.00-600.02

| m/z    | Intensity | Relative |
|--------|-----------|----------|
| 505.13 | 0.0       | 0.00     |
| 505.74 | 41.0      | 0.01     |
| 506.55 | 279.8     | 0.04     |
| 507.16 | 139.3     | 0.02     |
| 508.00 | 108.3     | 0.01     |
| 508.90 | 0.1       | 0.00     |
| 509.93 | 0.1       | 0.00     |
| 510.50 | 10.2      | 0.00     |
| 511.21 | 0.0       | 0.00     |
| 511.84 | 18.8      | 0.00     |
| 512.80 | 0.0       | 0.00     |
| 513.75 | 250.3     | 0.03     |
| 514.43 | 0.1       | 0.00     |
| 515.78 | 0.3       | 0.00     |
| 516.80 | 9.4       | 0.00     |
| 517.44 | 247.6     | 0.03     |
| 518.31 | 0.3       | 0.00     |
| 519.04 | 2.1       | 0.00     |
| 519.54 | 0.0       | 0.00     |
| 520.87 | 12.8      | 0.00     |
| 521.39 | 0.1       | 0.00     |
| 522.75 | 0.1       | 0.00     |
| 523.77 | 22.8      | 0.00     |
| 524.60 | 0.1       | 0.00     |
| 525.28 | 26.4      | 0.00     |
| 526.01 | 11.9      | 0.00     |
| 526.55 | 336.8     | 0.05     |
| 527.63 | 0.4       | 0.00     |
| 528.37 | 285.6     | 0.04     |
| 529.70 | 0.1       | 0.00     |
| 530.21 | 140.7     | 0.02     |
| 531.01 | 0.4       | 0.00     |
| 532.57 | 54.5      | 0.01     |
| 533.39 | 261.9     | 0.04     |
| 534.36 | 19.0      | 0.00     |
| 534.92 | 33.9      | 0.00     |
| 535.83 | 0.3       | 0.00     |
| 536.34 | 0.0       | 0.00     |
| 537.06 | 0.0       | 0.00     |
| 537.59 | 0.0       | 0.00     |
| 538.52 | 12.1      | 0.00     |
| 539.05 | 7.7       | 0.00     |
| 539.66 | 241.3     | 0.03     |
| 540.65 | 0.0       | 0.00     |
| 541.20 | 0.0       | 0.00     |
| 542.20 | 0.2       | 0.00     |
| 542.87 | 0.2       | 0.00     |
| 543.94 | 0.2       | 0.00     |
| 544.93 | 0.1       | 0.00     |
| 545.53 | 360.7     | 0.05     |
| 546.28 | 0.1       | 0.00     |
| 547.68 | 0.2       | 0.00     |
| 548.35 | 164.1     | 0.02     |
| 549.37 | 200.8     | 0.03     |
| 550.10 | 8.3       | 0.00     |

Hayam-106#33 RT: 0.14

T: {0,0} + c EI Full ms [50.00-600.00]

m/z= 50.00-600.02

| m/z    | Intensity | Relative |
|--------|-----------|----------|
| 551.25 | 0.1       | 0.00     |
| 552.29 | 36.1      | 0.00     |
| 553.55 | 15.6      | 0.00     |
| 554.70 | 0.2       | 0.00     |
| 555.95 | 1.3       | 0.00     |
| 556.65 | 301.1     | 0.04     |
| 557.53 | 0.1       | 0.00     |
| 558.54 | 0.4       | 0.00     |
| 559.14 | 0.0       | 0.00     |
| 561.39 | 32.4      | 0.00     |
| 562.09 | 30.1      | 0.00     |
| 563.16 | 546.9     | 0.07     |
| 563.92 | 171.8     | 0.02     |
| 564.48 | 0.0       | 0.00     |
| 565.46 | 0.0       | 0.00     |
| 566.15 | 0.0       | 0.00     |
| 567.09 | 0.0       | 0.00     |
| 567.76 | 26.0      | 0.00     |
| 569.01 | 13.8      | 0.00     |
| 570.11 | 28.5      | 0.00     |
| 571.18 | 11.3      | 0.00     |
| 572.58 | 20.9      | 0.00     |
| 573.39 | 261.1     | 0.04     |
| 574.05 | 227.0     | 0.03     |
| 574.57 | 422.5     | 0.06     |
| 575.20 | 357.8     | 0.05     |
| 576.05 | 35.7      | 0.00     |
| 576.63 | 26.9      | 0.00     |
| 577.29 | 26.2      | 0.00     |
| 577.90 | 0.0       | 0.00     |
| 578.54 | 0.1       | 0.00     |
| 579.77 | 257.8     | 0.03     |
| 580.28 | 89.4      | 0.01     |
| 580.97 | 0.2       | 0.00     |
| 582.36 | 19.1      | 0.00     |
| 583.02 | 193.5     | 0.03     |
| 583.87 | 275.3     | 0.04     |
| 584.89 | 0.0       | 0.00     |
| 585.49 | 292.6     | 0.04     |
| 586.81 | 0.1       | 0.00     |
| 587.35 | 0.9       | 0.00     |
| 587.95 | 0.1       | 0.00     |
| 589.14 | 480.1     | 0.07     |
| 589.82 | 5.6       | 0.00     |
| 590.62 | 1.2       | 0.00     |
| 591.30 | 0.0       | 0.00     |
| 592.00 | 0.0       | 0.00     |
| 592.62 | 27.2      | 0.00     |
| 593.51 | 0.0       | 0.00     |
| 594.31 | 0.3       | 0.00     |
| 594.84 | 216.2     | 0.03     |
| 595.89 | 0.2       | 0.00     |
| 596.89 | 271.9     | 0.04     |
| 597.69 | 45.5      | 0.01     |
| 598.37 | 1.1       | 0.00     |

Hayam-106#33 RT: 0.14

T: {0,0} + c EI Full ms [50.00-600.00]

m/z= 50.00-600.02

| m/z    | Intensity | Relative |
|--------|-----------|----------|
| 599.25 | 0.0       | 0.00     |
| 599.93 | 0.0       | 0.00     |
