# Supplementary material for: A Simple and Efficient Multicomponent Synthesis of Novel Pyrazole, N-aminopyridine and Pyrazolo[3,4-b]Pyridine Derivatives in Water
Source: Preprints.org preprint supplement (doi:10.20944/preprints202312.1232.v1), 2023-12-28
Supplement: Supplementary file 59 [file supplementary]

RT: 0.00 - 4.24

NL:  
3.15E5  
TIC MS  
Selwan-65

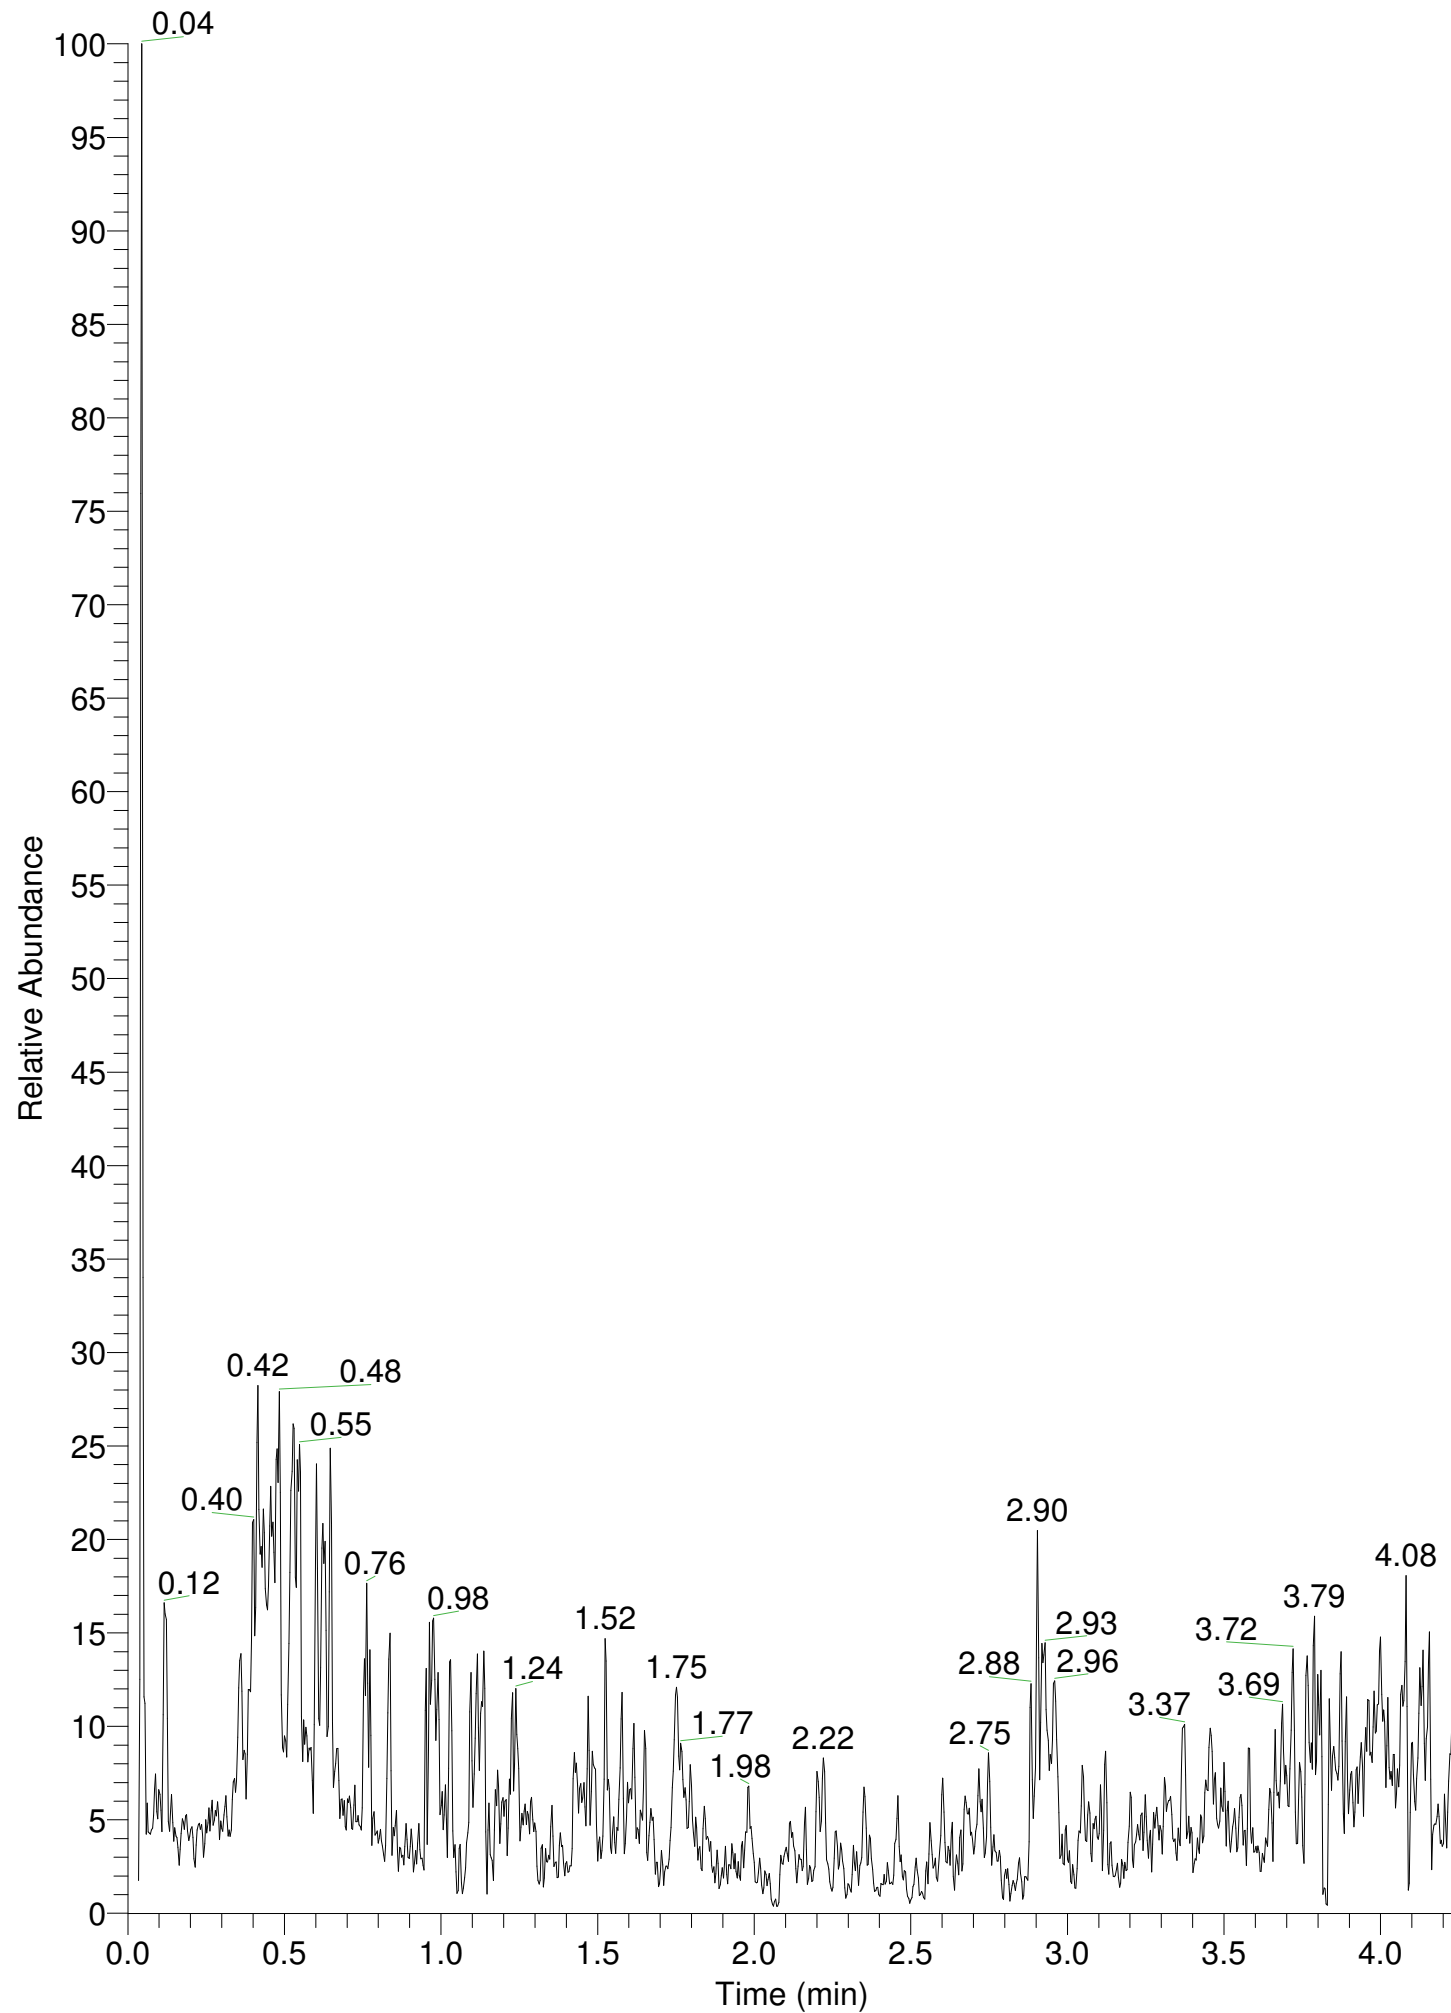

Selwan-65 #6 RT: 0.05 AV: 1 NL: 1.87E4

T: {0,0} + c EI Full ms [50.00-1000.00]

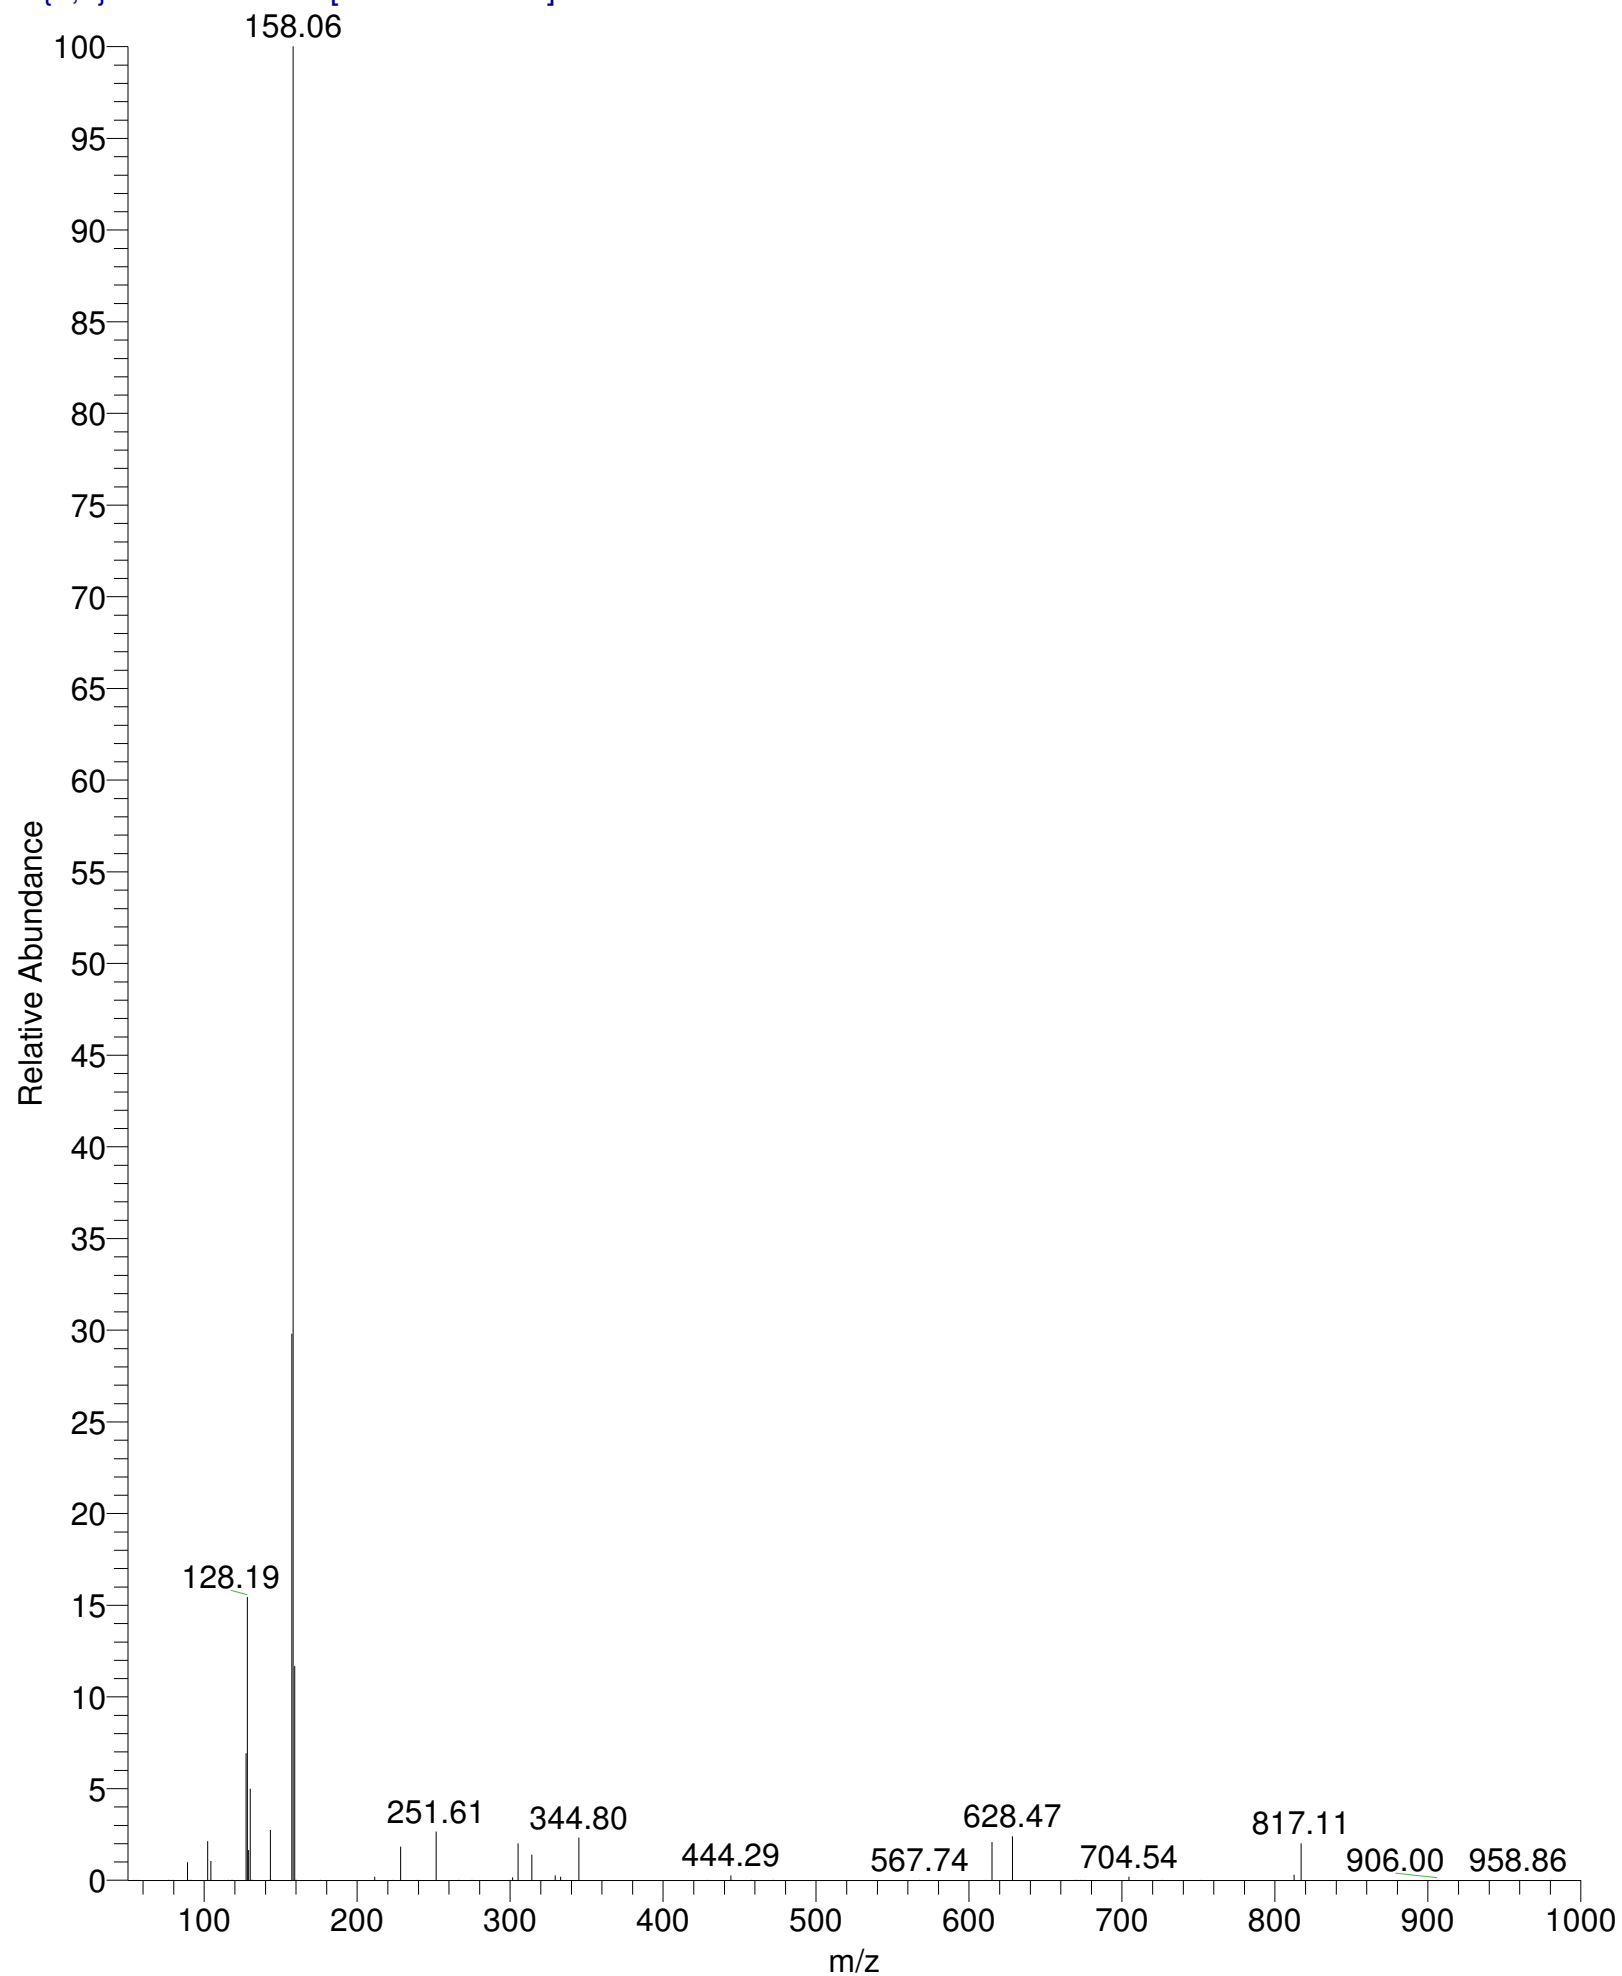

Selwan-65#6 RT: 0.05

T: {0,0} + c EI Full ms [50.00-1000.00]

m/z= 50.00-1000.04

| m/z    | Intensity | Relative |
|--------|-----------|----------|
| 54.17  | 0.4       | 0.00     |
| 56.52  | 0.1       | 0.00     |
| 76.44  | 0.2       | 0.00     |
| 77.52  | 0.3       | 0.00     |
| 79.67  | 0.1       | 0.00     |
| 89.00  | 180.5     | 0.97     |
| 90.48  | 0.5       | 0.00     |
| 91.29  | 0.4       | 0.00     |
| 102.20 | 396.1     | 2.12     |
| 103.46 | 0.5       | 0.00     |
| 104.26 | 194.6     | 1.04     |
| 115.51 | 1.0       | 0.01     |
| 117.60 | 0.6       | 0.00     |
| 118.58 | 0.3       | 0.00     |
| 127.24 | 1294.5    | 6.93     |
| 128.19 | 2887.0    | 15.44    |
| 129.02 | 304.6     | 1.63     |
| 130.08 | 930.2     | 4.98     |
| 130.76 | 0.9       | 0.01     |
| 131.30 | 0.3       | 0.00     |
| 142.37 | 0.2       | 0.00     |
| 143.12 | 511.9     | 2.74     |
| 144.06 | 0.5       | 0.00     |
| 157.18 | 5570.8    | 29.80    |
| 158.06 | 18692.8   | 100.00   |
| 159.18 | 2179.4    | 11.66    |
| 159.83 | 0.4       | 0.00     |
| 160.41 | 0.1       | 0.00     |
| 175.75 | 0.4       | 0.00     |
| 211.42 | 34.7      | 0.19     |
| 223.37 | 0.2       | 0.00     |
| 228.39 | 339.4     | 1.82     |
| 239.42 | 0.1       | 0.00     |
| 251.61 | 494.0     | 2.64     |
| 266.13 | 0.2       | 0.00     |
| 275.01 | 0.3       | 0.00     |
| 300.01 | 0.1       | 0.00     |
| 301.52 | 27.2      | 0.15     |
| 305.18 | 373.8     | 2.00     |
| 314.06 | 258.5     | 1.38     |
| 329.40 | 47.2      | 0.25     |
| 332.90 | 33.1      | 0.18     |
| 344.80 | 432.4     | 2.31     |
| 428.77 | 0.5       | 0.00     |
| 444.29 | 46.2      | 0.25     |
| 445.17 | 0.2       | 0.00     |
| 457.59 | 0.1       | 0.00     |
| 472.09 | 0.1       | 0.00     |
| 567.74 | 0.4       | 0.00     |
| 610.89 | 0.1       | 0.00     |
| 615.04 | 386.5     | 2.07     |
| 628.47 | 445.9     | 2.39     |
| 669.39 | 0.1       | 0.00     |
| 670.60 | 0.1       | 0.00     |
| 673.28 | 0.4       | 0.00     |

Selwan-65#6 RT: 0.05

T: {0,0} + c EI Full ms [50.00-1000.00]

m/z= 50.00-1000.04

| m/z    | Intensity | Relative |
|--------|-----------|----------|
| 675.71 | 0.3       | 0.00     |
| 704.54 | 33.5      | 0.18     |
| 726.31 | 0.1       | 0.00     |
| 751.72 | 0.1       | 0.00     |
| 812.54 | 53.1      | 0.28     |
| 817.11 | 373.5     | 2.00     |
| 906.00 | 0.1       | 0.00     |
| 958.86 | 0.2       | 0.00     |
| 980.25 | 0.1       | 0.00     |
