# Supplementary material for: A Simple and Efficient Multicomponent Synthesis of Novel Pyrazole, N-aminopyridine and Pyrazolo[3,4-b]Pyridine Derivatives in Water
Source: Preprints.org preprint supplement (doi:10.20944/preprints202312.1232.v1), 2023-12-28
Supplement: Supplementary file 62 [file supplementary]

RT: 0.00 - 4.19

NL:  
3.02E6  
TIC MS  
Hayam-130

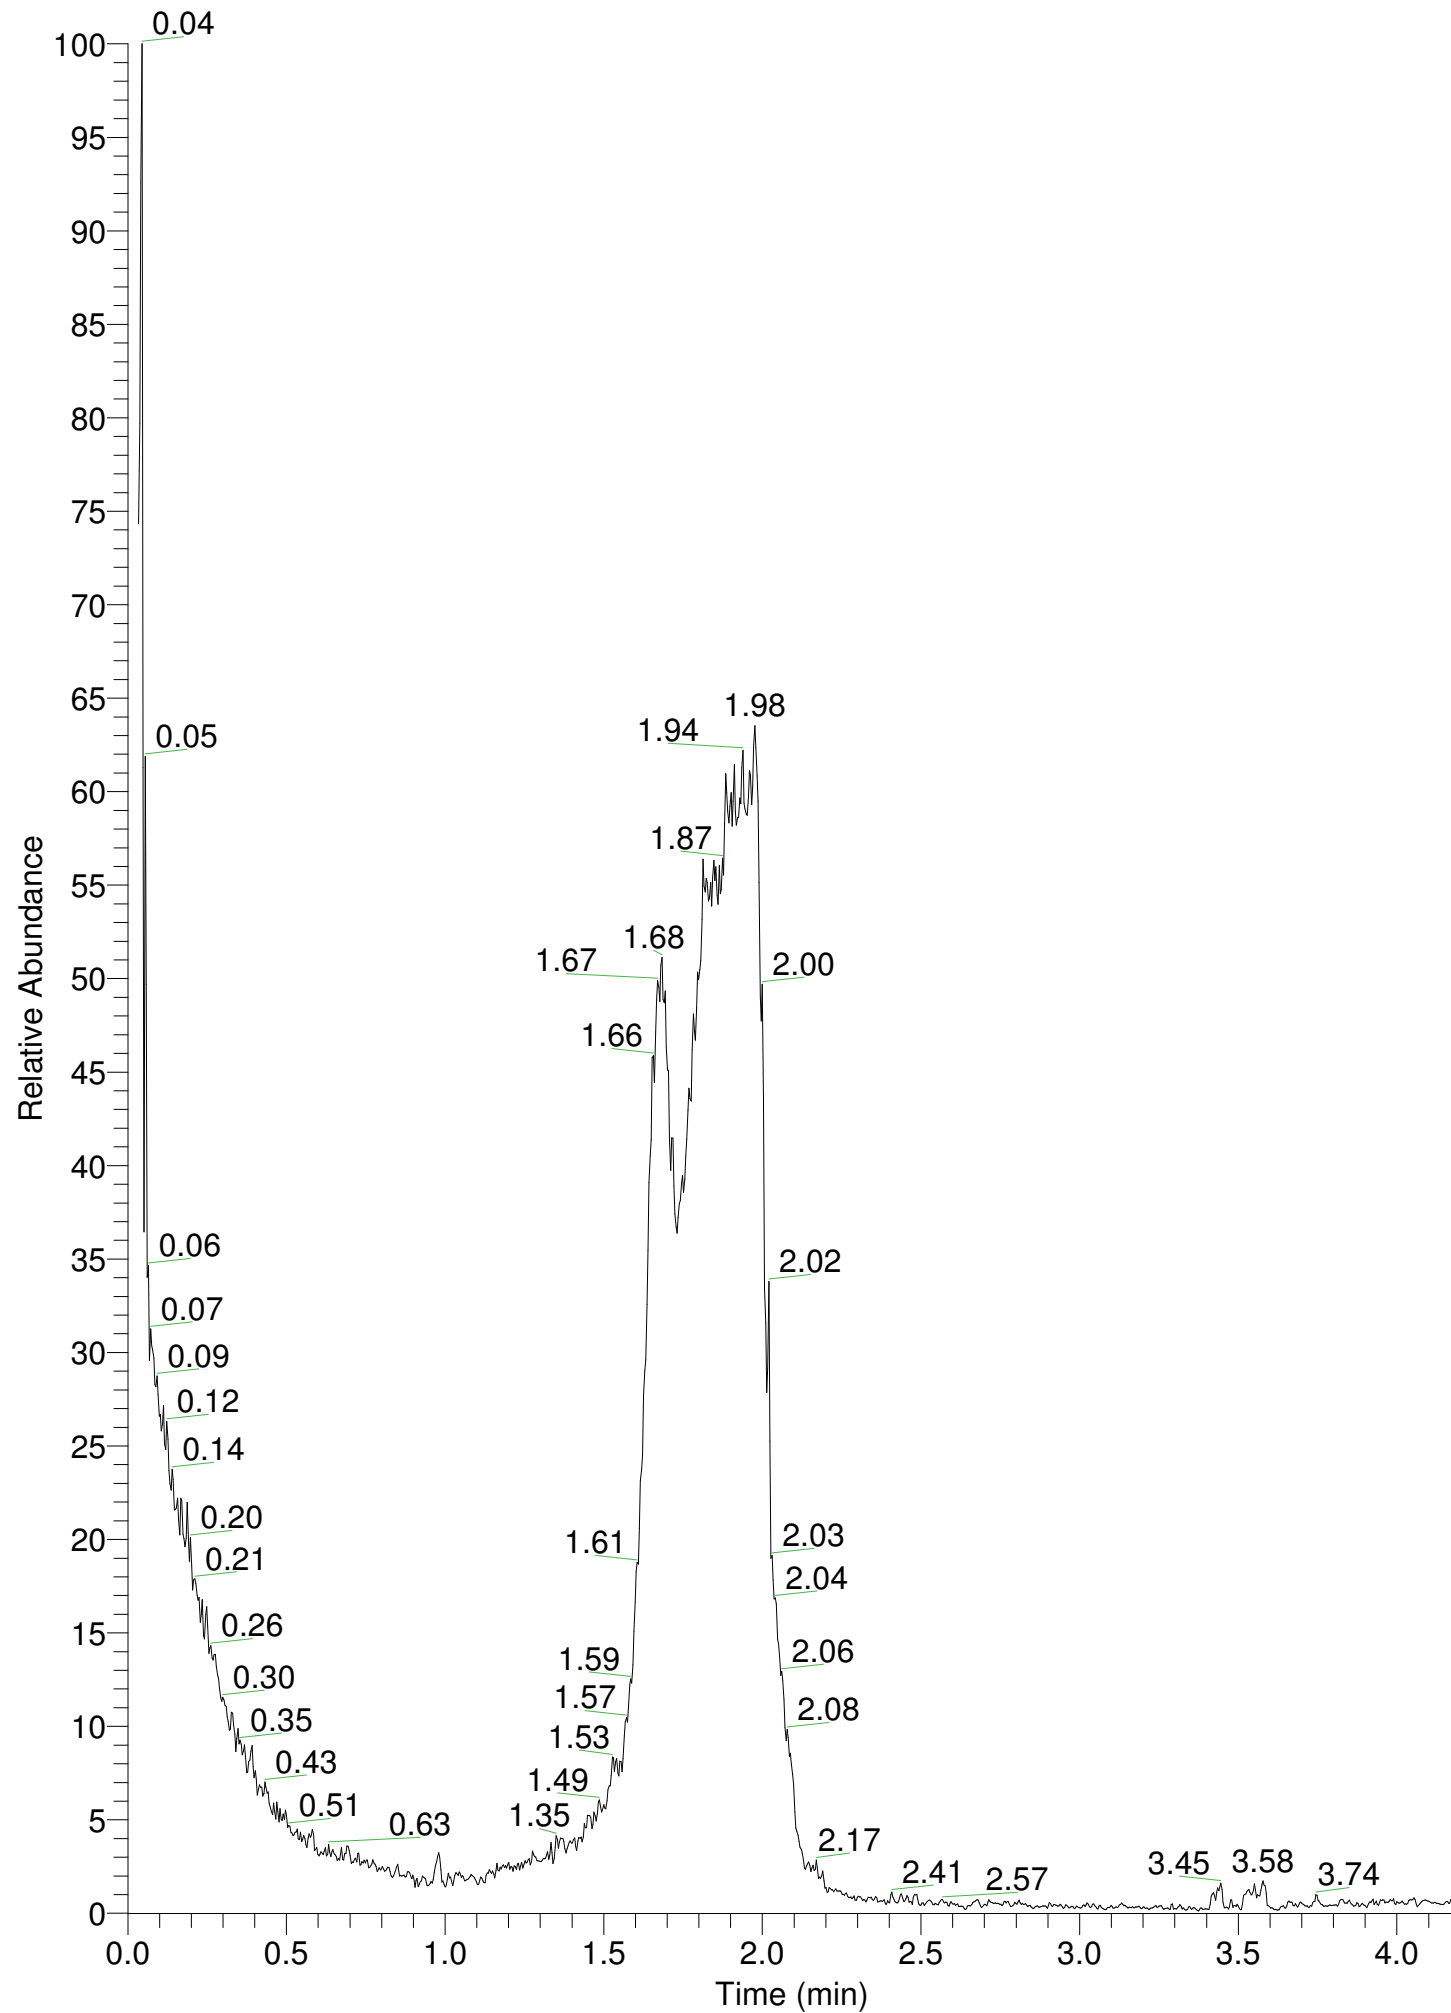

Hayam-130 #526 RT: 1.82 AV: 1 NL: 1.15E5

T: {0,0} + c EI Full ms [50.00-600.00]

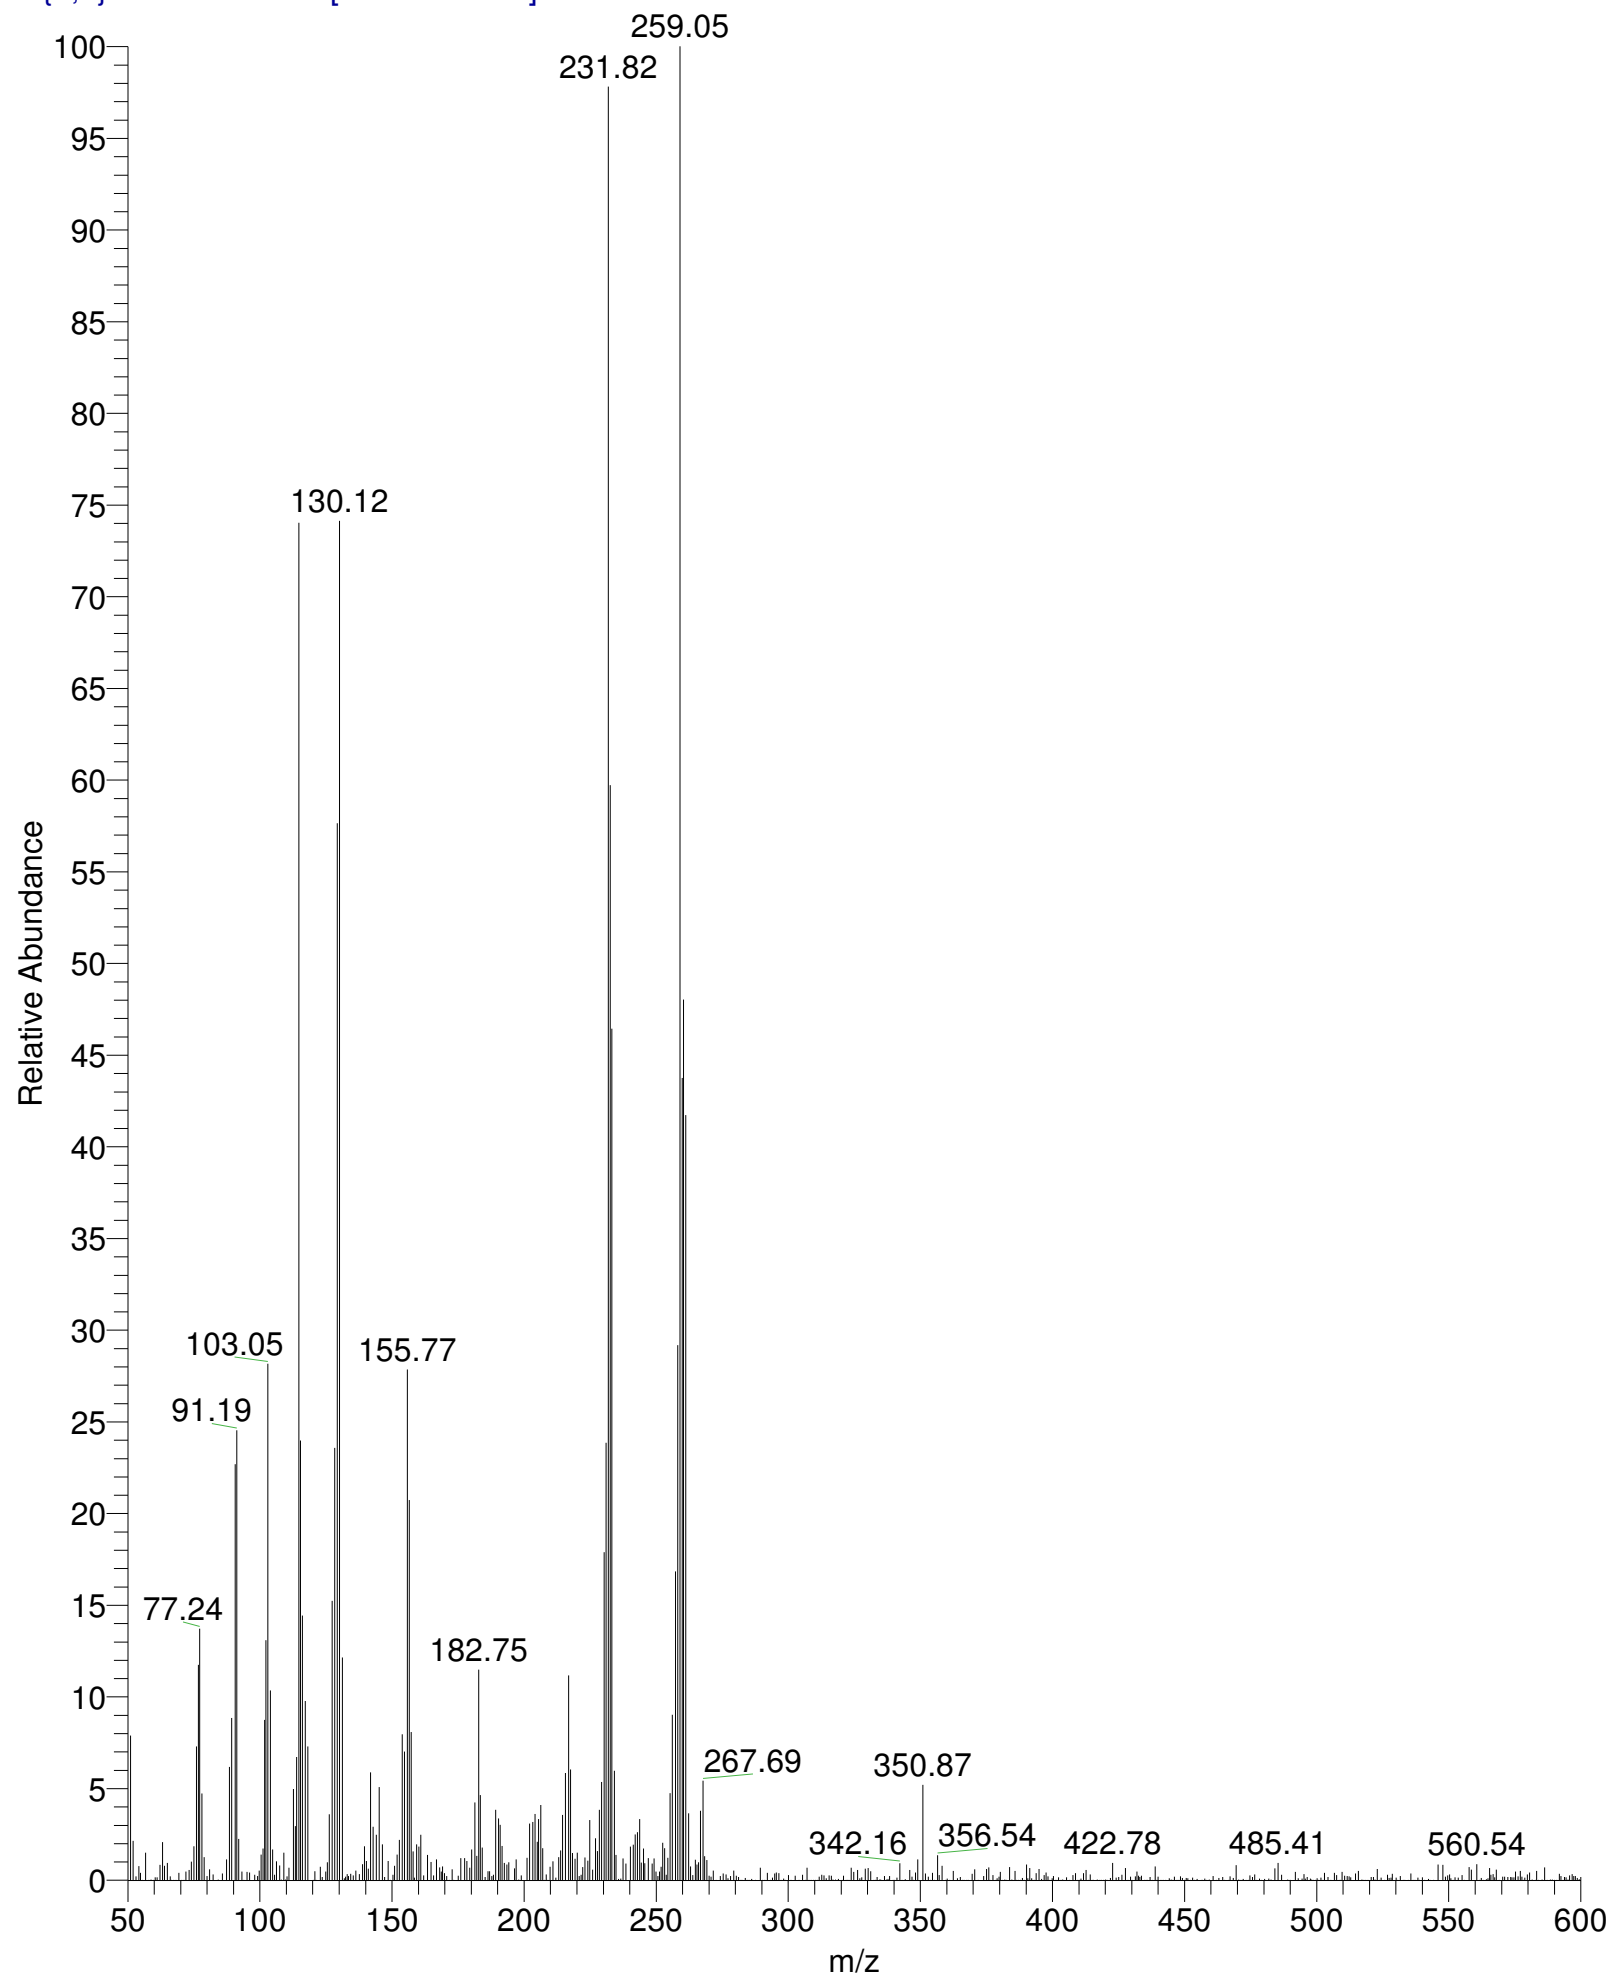

Hayam-130#526 RT: 1.82

T: {0,0} + c EI Full ms [50.00-600.00]

m/z= 50.00-600.03

| m/z    | Intensity | Relative |
|--------|-----------|----------|
| 51.01  | 9026.9    | 7.88     |
| 52.01  | 2441.5    | 2.13     |
| 53.10  | 225.2     | 0.20     |
| 54.23  | 878.0     | 0.77     |
| 54.83  | 445.7     | 0.39     |
| 55.53  | 0.2       | 0.00     |
| 56.70  | 1705.6    | 1.49     |
| 57.96  | 0.3       | 0.00     |
| 58.77  | 38.3      | 0.03     |
| 59.58  | 0.2       | 0.00     |
| 60.41  | 172.0     | 0.15     |
| 61.05  | 165.9     | 0.14     |
| 62.16  | 944.4     | 0.82     |
| 63.18  | 2371.2    | 2.07     |
| 63.93  | 884.5     | 0.77     |
| 64.90  | 1064.8    | 0.93     |
| 66.00  | 234.9     | 0.21     |
| 66.51  | 0.0       | 0.00     |
| 67.37  | 0.2       | 0.00     |
| 68.23  | 1.7       | 0.00     |
| 69.34  | 452.0     | 0.39     |
| 70.38  | 3.3       | 0.00     |
| 71.22  | 10.7      | 0.01     |
| 72.03  | 523.5     | 0.46     |
| 73.22  | 625.6     | 0.55     |
| 74.06  | 1141.3    | 1.00     |
| 75.01  | 2104.7    | 1.84     |
| 75.95  | 8354.8    | 7.29     |
| 76.72  | 13446.3   | 11.74    |
| 77.24  | 15713.0   | 13.72    |
| 78.09  | 5400.5    | 4.71     |
| 78.90  | 1421.7    | 1.24     |
| 80.00  | 253.1     | 0.22     |
| 80.93  | 665.1     | 0.58     |
| 82.25  | 359.0     | 0.31     |
| 84.25  | 35.7      | 0.03     |
| 85.80  | 401.7     | 0.35     |
| 87.33  | 1284.7    | 1.12     |
| 88.50  | 7058.7    | 6.16     |
| 89.25  | 10125.3   | 8.84     |
| 90.64  | 25986.6   | 22.68    |
| 91.19  | 28094.6   | 24.52    |
| 91.95  | 2561.0    | 2.24     |
| 93.16  | 539.3     | 0.47     |
| 93.87  | 2.4       | 0.00     |
| 95.08  | 501.9     | 0.44     |
| 96.14  | 472.9     | 0.41     |
| 97.98  | 321.1     | 0.28     |
| 99.12  | 243.7     | 0.21     |
| 99.74  | 585.9     | 0.51     |
| 100.41 | 1581.9    | 1.38     |
| 101.12 | 1970.6    | 1.72     |
| 101.76 | 10014.6   | 8.74     |
| 102.28 | 14979.0   | 13.07    |
| 103.05 | 32253.1   | 28.15    |

Hayam-130#526 RT: 1.82

T: {0,0} + c EI Full ms [50.00-600.00]

m/z= 50.00-600.03

| m/z    | Intensity | Relative |
|--------|-----------|----------|
| 103.97 | 11839.9   | 10.33    |
| 104.81 | 1909.3    | 1.67     |
| 105.48 | 338.4     | 0.30     |
| 106.24 | 1167.2    | 1.02     |
| 107.43 | 915.5     | 0.80     |
| 108.05 | 22.4      | 0.02     |
| 109.04 | 1716.7    | 1.50     |
| 109.67 | 20.7      | 0.02     |
| 110.27 | 224.5     | 0.20     |
| 110.95 | 773.3     | 0.68     |
| 112.68 | 5682.6    | 4.96     |
| 113.35 | 3365.7    | 2.94     |
| 113.90 | 7686.3    | 6.71     |
| 114.79 | 84808.8   | 74.03    |
| 115.40 | 27454.4   | 23.96    |
| 116.03 | 16515.1   | 14.42    |
| 117.13 | 11194.7   | 9.77     |
| 118.11 | 8347.4    | 7.29     |
| 120.20 | 2.9       | 0.00     |
| 120.82 | 557.0     | 0.49     |
| 121.32 | 4.5       | 0.00     |
| 122.80 | 824.7     | 0.72     |
| 123.64 | 193.8     | 0.17     |
| 124.88 | 520.9     | 0.45     |
| 125.56 | 1109.0    | 0.97     |
| 126.25 | 4102.6    | 3.58     |
| 127.37 | 17452.4   | 15.23    |
| 128.34 | 27000.2   | 23.57    |
| 129.25 | 66026.9   | 57.63    |
| 130.12 | 84932.3   | 74.14    |
| 131.17 | 13903.4   | 12.14    |
| 131.96 | 108.9     | 0.10     |
| 132.48 | 218.6     | 0.19     |
| 132.99 | 369.7     | 0.32     |
| 133.53 | 242.3     | 0.21     |
| 134.38 | 395.7     | 0.35     |
| 135.36 | 295.6     | 0.26     |
| 136.25 | 594.5     | 0.52     |
| 137.67 | 365.9     | 0.32     |
| 138.89 | 991.4     | 0.87     |
| 139.53 | 2105.9    | 1.84     |
| 140.36 | 1191.0    | 1.04     |
| 141.00 | 708.1     | 0.62     |
| 141.90 | 6723.4    | 5.87     |
| 142.89 | 3322.0    | 2.90     |
| 144.00 | 2831.3    | 2.47     |
| 145.17 | 5812.1    | 5.07     |
| 146.31 | 2239.1    | 1.95     |
| 147.19 | 180.9     | 0.16     |
| 148.48 | 1188.2    | 1.04     |
| 149.44 | 18.4      | 0.02     |
| 150.37 | 332.8     | 0.29     |
| 150.91 | 880.8     | 0.77     |
| 151.87 | 1584.1    | 1.38     |
| 152.82 | 2513.5    | 2.19     |

Hayam-130#526 RT: 1.82

T: {0,0} + c EI Full ms [50.00-600.00]

m/z= 50.00-600.03

| m/z    | Intensity | Relative |
|--------|-----------|----------|
| 153.85 | 9103.2    | 7.95     |
| 154.73 | 8026.6    | 7.01     |
| 155.77 | 31890.7   | 27.84    |
| 156.48 | 23733.6   | 20.72    |
| 157.24 | 9244.6    | 8.07     |
| 157.99 | 1781.5    | 1.56     |
| 158.50 | 140.7     | 0.12     |
| 159.29 | 2234.6    | 1.95     |
| 160.19 | 2091.8    | 1.83     |
| 160.85 | 2825.3    | 2.47     |
| 162.04 | 290.2     | 0.25     |
| 163.41 | 1561.6    | 1.36     |
| 164.73 | 1127.5    | 0.98     |
| 165.75 | 285.4     | 0.25     |
| 166.88 | 1286.0    | 1.12     |
| 168.03 | 799.5     | 0.70     |
| 168.59 | 522.3     | 0.46     |
| 169.15 | 840.2     | 0.73     |
| 169.79 | 427.3     | 0.37     |
| 170.71 | 240.3     | 0.21     |
| 171.67 | 0.0       | 0.00     |
| 172.75 | 668.4     | 0.58     |
| 173.39 | 6.8       | 0.01     |
| 175.03 | 261.5     | 0.23     |
| 176.09 | 1374.2    | 1.20     |
| 177.44 | 1365.2    | 1.19     |
| 178.39 | 1194.9    | 1.04     |
| 179.45 | 778.1     | 0.68     |
| 180.13 | 1918.3    | 1.67     |
| 181.32 | 4839.0    | 4.22     |
| 182.04 | 1503.4    | 1.31     |
| 182.75 | 13148.9   | 11.48    |
| 183.40 | 5309.1    | 4.63     |
| 184.12 | 2029.6    | 1.77     |
| 185.29 | 183.5     | 0.16     |
| 186.27 | 548.1     | 0.48     |
| 186.89 | 552.0     | 0.48     |
| 187.75 | 253.7     | 0.22     |
| 188.33 | 329.3     | 0.29     |
| 189.21 | 4379.9    | 3.82     |
| 190.31 | 3856.1    | 3.37     |
| 190.95 | 3454.0    | 3.01     |
| 191.62 | 2137.1    | 1.87     |
| 192.47 | 1078.1    | 0.94     |
| 193.50 | 964.6     | 0.84     |
| 194.15 | 1117.3    | 0.98     |
| 196.42 | 719.8     | 0.63     |
| 196.98 | 1293.5    | 1.13     |
| 197.98 | 22.2      | 0.02     |
| 198.98 | 293.7     | 0.26     |
| 201.14 | 1392.7    | 1.22     |
| 202.07 | 3523.8    | 3.08     |
| 203.24 | 3635.7    | 3.17     |
| 204.12 | 4133.9    | 3.61     |
| 204.98 | 2397.9    | 2.09     |

Hayam-130#526 RT: 1.82

T: {0,0} + c EI Full ms [50.00-600.00]

m/z= 50.00-600.03

| m/z    | Intensity | Relative |
|--------|-----------|----------|
| 205.51 | 3815.1    | 3.33     |
| 206.30 | 4695.6    | 4.10     |
| 207.09 | 1994.9    | 1.74     |
| 207.68 | 15.5      | 0.01     |
| 208.42 | 359.5     | 0.31     |
| 208.99 | 3.8       | 0.00     |
| 209.80 | 821.6     | 0.72     |
| 210.93 | 1165.0    | 1.02     |
| 211.95 | 158.8     | 0.14     |
| 213.10 | 1432.7    | 1.25     |
| 213.83 | 1842.7    | 1.61     |
| 214.55 | 4059.1    | 3.54     |
| 215.68 | 6684.6    | 5.83     |
| 216.79 | 12786.5   | 11.16    |
| 217.62 | 6904.3    | 6.03     |
| 218.29 | 1691.8    | 1.48     |
| 219.33 | 1330.9    | 1.16     |
| 220.12 | 1704.5    | 1.49     |
| 220.85 | 240.5     | 0.21     |
| 221.57 | 327.3     | 0.29     |
| 222.17 | 818.0     | 0.71     |
| 223.04 | 1414.3    | 1.23     |
| 224.08 | 1200.3    | 1.05     |
| 224.89 | 3744.2    | 3.27     |
| 225.90 | 659.1     | 0.58     |
| 227.04 | 2603.9    | 2.27     |
| 227.76 | 1808.5    | 1.58     |
| 228.46 | 4398.3    | 3.84     |
| 229.36 | 6120.2    | 5.34     |
| 230.26 | 20492.1   | 17.89    |
| 231.05 | 27313.4   | 23.84    |
| 231.82 | 112057.1  | 97.81    |
| 232.61 | 68417.0   | 59.72    |
| 233.26 | 53201.9   | 46.44    |
| 234.15 | 6824.5    | 5.96     |
| 234.77 | 1567.8    | 1.37     |
| 235.76 | 68.9      | 0.06     |
| 236.62 | 81.3      | 0.07     |
| 237.40 | 1340.0    | 1.17     |
| 238.50 | 1038.7    | 0.91     |
| 240.26 | 2089.2    | 1.82     |
| 241.27 | 2203.2    | 1.92     |
| 242.05 | 2842.8    | 2.48     |
| 242.91 | 2991.2    | 2.61     |
| 243.78 | 3805.1    | 3.32     |
| 244.37 | 1080.8    | 0.94     |
| 245.13 | 1966.9    | 1.72     |
| 245.71 | 1047.6    | 0.91     |
| 247.02 | 1362.7    | 1.19     |
| 248.47 | 1021.2    | 0.89     |
| 249.15 | 1348.8    | 1.18     |
| 249.95 | 528.8     | 0.46     |
| 250.64 | 259.1     | 0.23     |
| 251.29 | 520.8     | 0.45     |
| 251.80 | 829.4     | 0.72     |

Hayam-130#526 RT: 1.82

T: {0,0} + c EI Full ms [50.00-600.00]

m/z= 50.00-600.03

| m/z    | Intensity | Relative |
|--------|-----------|----------|
| 252.48 | 2329.9    | 2.03     |
| 253.22 | 1983.9    | 1.73     |
| 253.74 | 337.2     | 0.29     |
| 254.44 | 1390.0    | 1.21     |
| 255.23 | 5427.6    | 4.74     |
| 256.11 | 10325.1   | 9.01     |
| 257.25 | 19291.9   | 16.84    |
| 258.18 | 33417.1   | 29.17    |
| 259.05 | 114563.4  | 100.00   |
| 259.82 | 50115.9   | 43.75    |
| 260.33 | 55013.3   | 48.02    |
| 261.20 | 47786.7   | 41.71    |
| 262.23 | 4166.0    | 3.64     |
| 263.06 | 848.8     | 0.74     |
| 263.85 | 300.4     | 0.26     |
| 264.84 | 1267.2    | 1.11     |
| 265.43 | 964.9     | 0.84     |
| 266.08 | 1105.7    | 0.97     |
| 266.76 | 4321.5    | 3.77     |
| 267.69 | 6201.8    | 5.41     |
| 268.37 | 1499.3    | 1.31     |
| 269.22 | 1251.6    | 1.09     |
| 270.07 | 276.2     | 0.24     |
| 270.76 | 212.3     | 0.19     |
| 271.59 | 594.8     | 0.52     |
| 272.68 | 19.4      | 0.02     |
| 274.21 | 246.8     | 0.22     |
| 275.30 | 414.0     | 0.36     |
| 276.42 | 346.9     | 0.30     |
| 277.17 | 110.0     | 0.10     |
| 278.15 | 245.9     | 0.21     |
| 279.31 | 582.2     | 0.51     |
| 280.32 | 275.3     | 0.24     |
| 281.13 | 193.6     | 0.17     |
| 281.96 | 0.8       | 0.00     |
| 282.50 | 5.1       | 0.00     |
| 283.75 | 132.3     | 0.12     |
| 284.44 | 12.8      | 0.01     |
| 285.18 | 1.4       | 0.00     |
| 286.17 | 74.6      | 0.07     |
| 287.57 | 0.8       | 0.00     |
| 289.43 | 774.1     | 0.68     |
| 290.24 | 1.6       | 0.00     |
| 291.11 | 0.2       | 0.00     |
| 292.10 | 444.6     | 0.39     |
| 293.31 | 0.0       | 0.00     |
| 293.99 | 147.0     | 0.13     |
| 294.87 | 405.7     | 0.35     |
| 295.42 | 470.7     | 0.41     |
| 296.42 | 422.9     | 0.37     |
| 297.30 | 0.4       | 0.00     |
| 298.30 | 94.2      | 0.08     |
| 298.85 | 16.5      | 0.01     |
| 300.02 | 304.2     | 0.27     |
| 300.97 | 0.2       | 0.00     |

Hayam-130#526 RT: 1.82

T: {0,0} + c EI Full ms [50.00-600.00]

m/z= 50.00-600.03

| m/z    | Intensity | Relative |
|--------|-----------|----------|
| 302.66 | 268.0     | 0.23     |
| 304.10 | 5.2       | 0.00     |
| 305.45 | 323.8     | 0.28     |
| 306.54 | 4.9       | 0.00     |
| 307.12 | 765.5     | 0.67     |
| 307.84 | 5.3       | 0.00     |
| 308.72 | 0.7       | 0.00     |
| 309.47 | 10.3      | 0.01     |
| 310.21 | 0.0       | 0.00     |
| 311.00 | 0.1       | 0.00     |
| 311.63 | 217.5     | 0.19     |
| 312.69 | 331.0     | 0.29     |
| 313.46 | 291.0     | 0.25     |
| 314.31 | 118.2     | 0.10     |
| 315.48 | 280.6     | 0.24     |
| 316.29 | 273.0     | 0.24     |
| 316.87 | 23.3      | 0.02     |
| 317.88 | 21.2      | 0.02     |
| 318.97 | 71.1      | 0.06     |
| 320.36 | 0.5       | 0.00     |
| 320.95 | 267.7     | 0.23     |
| 321.83 | 0.0       | 0.00     |
| 322.39 | 5.3       | 0.00     |
| 323.00 | 0.0       | 0.00     |
| 323.83 | 765.6     | 0.67     |
| 324.75 | 507.2     | 0.44     |
| 326.22 | 626.8     | 0.55     |
| 327.04 | 106.6     | 0.09     |
| 327.82 | 164.4     | 0.14     |
| 329.14 | 704.3     | 0.61     |
| 330.26 | 752.3     | 0.66     |
| 331.19 | 546.9     | 0.48     |
| 332.42 | 7.3       | 0.01     |
| 332.96 | 1.5       | 0.00     |
| 333.66 | 196.7     | 0.17     |
| 334.76 | 41.5      | 0.04     |
| 335.33 | 0.9       | 0.00     |
| 336.34 | 246.1     | 0.21     |
| 337.14 | 26.9      | 0.02     |
| 337.72 | 66.4      | 0.06     |
| 338.39 | 247.8     | 0.22     |
| 339.61 | 7.0       | 0.01     |
| 340.30 | 0.2       | 0.00     |
| 341.09 | 140.1     | 0.12     |
| 342.16 | 1045.4    | 0.91     |
| 343.08 | 1.1       | 0.00     |
| 344.31 | 59.0      | 0.05     |
| 345.95 | 624.5     | 0.55     |
| 346.80 | 209.3     | 0.18     |
| 347.41 | 0.9       | 0.00     |
| 348.10 | 461.3     | 0.40     |
| 349.04 | 1280.1    | 1.12     |
| 350.87 | 5954.2    | 5.20     |
| 351.91 | 406.0     | 0.35     |
| 352.94 | 208.8     | 0.18     |



Hayam-130#526 RT: 1.82

T: {0,0} + c EI Full ms [50.00-600.00]

m/z= 50.00-600.03

| m/z    | Intensity | Relative |
|--------|-----------|----------|
| 353.81 | 0.1       | 0.00     |
| 354.54 | 456.4     | 0.40     |
| 355.34 | 0.1       | 0.00     |
| 356.54 | 1555.9    | 1.36     |
| 357.10 | 315.6     | 0.28     |
| 358.18 | 890.2     | 0.78     |
| 359.48 | 0.3       | 0.00     |
| 360.12 | 93.6      | 0.08     |
| 361.16 | 0.0       | 0.00     |
| 362.49 | 560.5     | 0.49     |
| 363.96 | 113.4     | 0.10     |
| 365.12 | 196.4     | 0.17     |
| 365.92 | 0.1       | 0.00     |
| 366.50 | 0.0       | 0.00     |
| 367.52 | 9.1       | 0.01     |
| 368.09 | 0.3       | 0.00     |
| 369.54 | 388.4     | 0.34     |
| 370.55 | 666.5     | 0.58     |
| 371.92 | 0.2       | 0.00     |
| 373.98 | 252.8     | 0.22     |
| 374.99 | 698.7     | 0.61     |
| 375.89 | 787.1     | 0.69     |
| 376.42 | 0.0       | 0.00     |
| 377.50 | 317.2     | 0.28     |
| 378.50 | 13.5      | 0.01     |
| 379.07 | 114.7     | 0.10     |
| 379.78 | 217.8     | 0.19     |
| 380.29 | 506.4     | 0.44     |
| 381.02 | 0.0       | 0.00     |
| 381.90 | 22.8      | 0.02     |
| 382.49 | 0.4       | 0.00     |
| 383.81 | 806.7     | 0.70     |
| 384.57 | 32.9      | 0.03     |
| 385.85 | 575.3     | 0.50     |
| 386.38 | 19.7      | 0.02     |
| 387.09 | 0.2       | 0.00     |
| 387.82 | 0.6       | 0.00     |
| 388.62 | 136.6     | 0.12     |
| 389.31 | 15.0      | 0.01     |
| 390.12 | 969.4     | 0.85     |
| 390.68 | 107.9     | 0.09     |
| 391.41 | 747.0     | 0.65     |
| 392.13 | 113.2     | 0.10     |
| 392.65 | 0.0       | 0.00     |
| 393.16 | 10.7      | 0.01     |
| 393.81 | 421.6     | 0.37     |
| 394.90 | 698.4     | 0.61     |
| 395.85 | 63.7      | 0.06     |
| 396.84 | 299.9     | 0.26     |
| 397.62 | 460.7     | 0.40     |
| 398.27 | 221.8     | 0.19     |
| 399.03 | 0.1       | 0.00     |
| 399.81 | 114.5     | 0.10     |
| 400.36 | 247.3     | 0.22     |
| 401.03 | 0.7       | 0.00     |

Hayam-130#526 RT: 1.82

T: {0,0} + c EI Full ms [50.00-600.00]

m/z= 50.00-600.03

| m/z    | Intensity | Relative |
|--------|-----------|----------|
| 401.71 | 1.2       | 0.00     |
| 402.30 | 173.6     | 0.15     |
| 403.17 | 0.1       | 0.00     |
| 403.76 | 27.6      | 0.02     |
| 404.28 | 0.0       | 0.00     |
| 405.36 | 173.9     | 0.15     |
| 406.47 | 7.6       | 0.01     |
| 407.74 | 301.8     | 0.26     |
| 408.68 | 431.6     | 0.38     |
| 409.60 | 0.3       | 0.00     |
| 410.20 | 7.6       | 0.01     |
| 410.71 | 95.3      | 0.08     |
| 411.70 | 438.0     | 0.38     |
| 412.75 | 623.5     | 0.54     |
| 413.53 | 5.3       | 0.00     |
| 414.28 | 357.5     | 0.31     |
| 414.99 | 0.1       | 0.00     |
| 415.52 | 6.8       | 0.01     |
| 416.95 | 31.1      | 0.03     |
| 417.87 | 0.1       | 0.00     |
| 418.47 | 0.0       | 0.00     |
| 419.35 | 1.3       | 0.00     |
| 420.05 | 28.5      | 0.02     |
| 420.72 | 0.8       | 0.00     |
| 421.92 | 138.2     | 0.12     |
| 422.78 | 1062.4    | 0.93     |
| 424.14 | 155.5     | 0.14     |
| 425.07 | 185.0     | 0.16     |
| 426.31 | 325.7     | 0.28     |
| 427.66 | 756.9     | 0.66     |
| 428.59 | 1.0       | 0.00     |
| 429.58 | 213.7     | 0.19     |
| 430.11 | 0.0       | 0.00     |
| 431.37 | 223.2     | 0.19     |
| 431.91 | 522.1     | 0.46     |
| 432.52 | 261.3     | 0.23     |
| 433.04 | 185.9     | 0.16     |
| 433.71 | 269.6     | 0.24     |
| 434.85 | 0.0       | 0.00     |
| 435.49 | 0.1       | 0.00     |
| 436.02 | 0.0       | 0.00     |
| 436.99 | 186.7     | 0.16     |
| 437.79 | 0.1       | 0.00     |
| 438.85 | 846.4     | 0.74     |
| 439.45 | 0.2       | 0.00     |
| 440.00 | 216.6     | 0.19     |
| 441.08 | 12.8      | 0.01     |
| 441.93 | 0.1       | 0.00     |
| 442.85 | 0.2       | 0.00     |
| 444.22 | 115.0     | 0.10     |
| 444.99 | 23.5      | 0.02     |
| 445.50 | 0.0       | 0.00     |
| 446.10 | 207.3     | 0.18     |
| 447.10 | 0.1       | 0.00     |
| 447.82 | 1.0       | 0.00     |

Hayam-130#526 RT: 1.82

T: {0,0} + c EI Full ms [50.00-600.00]

m/z= 50.00-600.03

| m/z    | Intensity | Relative |
|--------|-----------|----------|
| 448.46 | 233.3     | 0.20     |
| 449.19 | 133.8     | 0.12     |
| 449.98 | 5.2       | 0.00     |
| 450.56 | 124.5     | 0.11     |
| 451.18 | 116.7     | 0.10     |
| 452.22 | 2.8       | 0.00     |
| 453.00 | 143.1     | 0.12     |
| 453.78 | 0.0       | 0.00     |
| 454.79 | 68.3      | 0.06     |
| 456.26 | 12.3      | 0.01     |
| 456.78 | 0.9       | 0.00     |
| 457.59 | 80.5      | 0.07     |
| 458.40 | 0.0       | 0.00     |
| 459.33 | 29.9      | 0.03     |
| 460.77 | 259.9     | 0.23     |
| 461.95 | 0.0       | 0.00     |
| 462.99 | 127.6     | 0.11     |
| 464.40 | 180.8     | 0.16     |
| 465.11 | 1.0       | 0.00     |
| 466.67 | 3.3       | 0.00     |
| 467.17 | 238.9     | 0.21     |
| 468.37 | 135.2     | 0.12     |
| 469.54 | 920.3     | 0.80     |
| 470.50 | 28.9      | 0.03     |
| 471.31 | 0.1       | 0.00     |
| 472.23 | 61.7      | 0.05     |
| 473.31 | 0.2       | 0.00     |
| 474.06 | 0.0       | 0.00     |
| 474.77 | 281.5     | 0.25     |
| 475.75 | 185.4     | 0.16     |
| 476.51 | 351.8     | 0.31     |
| 477.21 | 2.3       | 0.00     |
| 478.30 | 95.8      | 0.08     |
| 479.26 | 0.0       | 0.00     |
| 480.33 | 78.2      | 0.07     |
| 481.86 | 91.8      | 0.08     |
| 482.77 | 20.1      | 0.02     |
| 484.12 | 722.6     | 0.63     |
| 485.41 | 1063.7    | 0.93     |
| 486.70 | 333.5     | 0.29     |
| 489.07 | 35.5      | 0.03     |
| 490.03 | 2.3       | 0.00     |
| 491.89 | 514.0     | 0.45     |
| 493.04 | 102.5     | 0.09     |
| 494.42 | 96.3      | 0.08     |
| 495.19 | 373.0     | 0.33     |
| 495.73 | 87.0      | 0.08     |
| 496.45 | 194.8     | 0.17     |
| 497.58 | 94.6      | 0.08     |
| 498.13 | 21.8      | 0.02     |
| 498.86 | 0.0       | 0.00     |
| 499.55 | 15.3      | 0.01     |
| 500.11 | 116.6     | 0.10     |
| 500.72 | 0.0       | 0.00     |
| 501.66 | 154.3     | 0.13     |

Hayam-130#526 RT: 1.82

T: {0,0} + c EI Full ms [50.00-600.00]

m/z= 50.00-600.03

| m/z    | Intensity | Relative |
|--------|-----------|----------|
| 502.33 | 0.0       | 0.00     |
| 502.95 | 451.7     | 0.39     |
| 504.25 | 188.2     | 0.16     |
| 505.41 | 0.7       | 0.00     |
| 506.71 | 449.6     | 0.39     |
| 507.53 | 310.8     | 0.27     |
| 508.46 | 0.3       | 0.00     |
| 508.97 | 0.0       | 0.00     |
| 509.65 | 513.8     | 0.45     |
| 510.58 | 271.8     | 0.24     |
| 511.59 | 254.1     | 0.22     |
| 512.24 | 235.3     | 0.21     |
| 512.89 | 177.8     | 0.16     |
| 514.68 | 403.2     | 0.35     |
| 515.74 | 564.0     | 0.49     |
| 517.11 | 28.4      | 0.02     |
| 517.84 | 0.1       | 0.00     |
| 518.51 | 0.1       | 0.00     |
| 519.39 | 3.0       | 0.00     |
| 520.62 | 198.5     | 0.17     |
| 521.42 | 193.5     | 0.17     |
| 522.10 | 37.9      | 0.03     |
| 522.99 | 682.0     | 0.60     |
| 523.79 | 0.0       | 0.00     |
| 524.40 | 141.3     | 0.12     |
| 525.71 | 1.3       | 0.00     |
| 526.84 | 326.7     | 0.29     |
| 527.42 | 135.8     | 0.12     |
| 528.13 | 148.4     | 0.13     |
| 528.67 | 382.8     | 0.33     |
| 530.09 | 144.1     | 0.13     |
| 530.69 | 11.6      | 0.01     |
| 531.64 | 244.1     | 0.21     |
| 532.71 | 15.8      | 0.01     |
| 533.31 | 0.1       | 0.00     |
| 534.66 | 0.1       | 0.00     |
| 535.69 | 411.5     | 0.36     |
| 536.56 | 6.8       | 0.01     |
| 537.20 | 0.1       | 0.00     |
| 538.32 | 145.6     | 0.13     |
| 538.93 | 4.6       | 0.00     |
| 540.00 | 178.2     | 0.16     |
| 540.82 | 1.0       | 0.00     |
| 542.35 | 63.8      | 0.06     |
| 542.91 | 12.0      | 0.01     |
| 544.21 | 0.3       | 0.00     |
| 545.90 | 960.0     | 0.84     |
| 547.72 | 948.7     | 0.83     |
| 548.72 | 219.1     | 0.19     |
| 549.56 | 295.5     | 0.26     |
| 550.28 | 347.3     | 0.30     |
| 550.81 | 106.0     | 0.09     |
| 551.64 | 7.9       | 0.01     |
| 552.34 | 174.1     | 0.15     |
| 553.54 | 155.7     | 0.14     |

Hayam-130#526 RT: 1.82

T: {0,0} + c EI Full ms [50.00-600.00]

m/z= 50.00-600.03

| m/z    | Intensity | Relative |
|--------|-----------|----------|
| 555.04 | 310.3     | 0.27     |
| 555.82 | 4.5       | 0.00     |
| 557.69 | 811.4     | 0.71     |
| 558.57 | 648.7     | 0.57     |
| 560.54 | 987.2     | 0.86     |
| 561.72 | 0.0       | 0.00     |
| 562.24 | 133.6     | 0.12     |
| 563.00 | 0.0       | 0.00     |
| 564.28 | 42.8      | 0.04     |
| 564.81 | 119.2     | 0.10     |
| 565.42 | 748.0     | 0.65     |
| 565.96 | 331.2     | 0.29     |
| 566.72 | 360.9     | 0.32     |
| 567.42 | 178.9     | 0.16     |
| 568.03 | 646.5     | 0.56     |
| 569.11 | 0.2       | 0.00     |
| 570.41 | 207.9     | 0.18     |
| 571.19 | 200.2     | 0.17     |
| 572.40 | 182.7     | 0.16     |
| 573.46 | 180.8     | 0.16     |
| 573.97 | 168.4     | 0.15     |
| 574.70 | 160.4     | 0.14     |
| 575.29 | 527.3     | 0.46     |
| 576.20 | 221.3     | 0.19     |
| 577.04 | 572.6     | 0.50     |
| 577.69 | 209.1     | 0.18     |
| 578.24 | 0.0       | 0.00     |
| 578.82 | 140.6     | 0.12     |
| 579.78 | 348.7     | 0.30     |
| 580.61 | 477.7     | 0.42     |
| 581.56 | 24.0      | 0.02     |
| 582.75 | 0.3       | 0.00     |
| 583.27 | 571.3     | 0.50     |
| 583.95 | 14.4      | 0.01     |
| 585.29 | 31.3      | 0.03     |
| 586.26 | 795.2     | 0.69     |
| 587.27 | 0.1       | 0.00     |
| 588.51 | 24.5      | 0.02     |
| 589.22 | 23.2      | 0.02     |
| 589.99 | 12.6      | 0.01     |
| 590.93 | 1.6       | 0.00     |
| 591.88 | 393.3     | 0.34     |
| 592.46 | 257.0     | 0.22     |
| 593.17 | 2.5       | 0.00     |
| 593.76 | 189.3     | 0.17     |
| 594.35 | 174.8     | 0.15     |
| 595.09 | 23.6      | 0.02     |
| 595.76 | 298.4     | 0.26     |
| 596.65 | 373.9     | 0.33     |
| 597.29 | 257.2     | 0.22     |
| 597.92 | 244.6     | 0.21     |
| 598.65 | 129.8     | 0.11     |
| 599.33 | 46.0      | 0.04     |
| 599.97 | 182.6     | 0.16     |
