# Supplementary material for: A Simple and Efficient Multicomponent Synthesis of Novel Pyrazole, N-aminopyridine and Pyrazolo[3,4-b]Pyridine Derivatives in Water
Source: Preprints.org preprint supplement (doi:10.20944/preprints202312.1232.v1), 2023-12-28
Supplement: Supplementary file 79 [file supplementary]

Peak Find - 44.jws

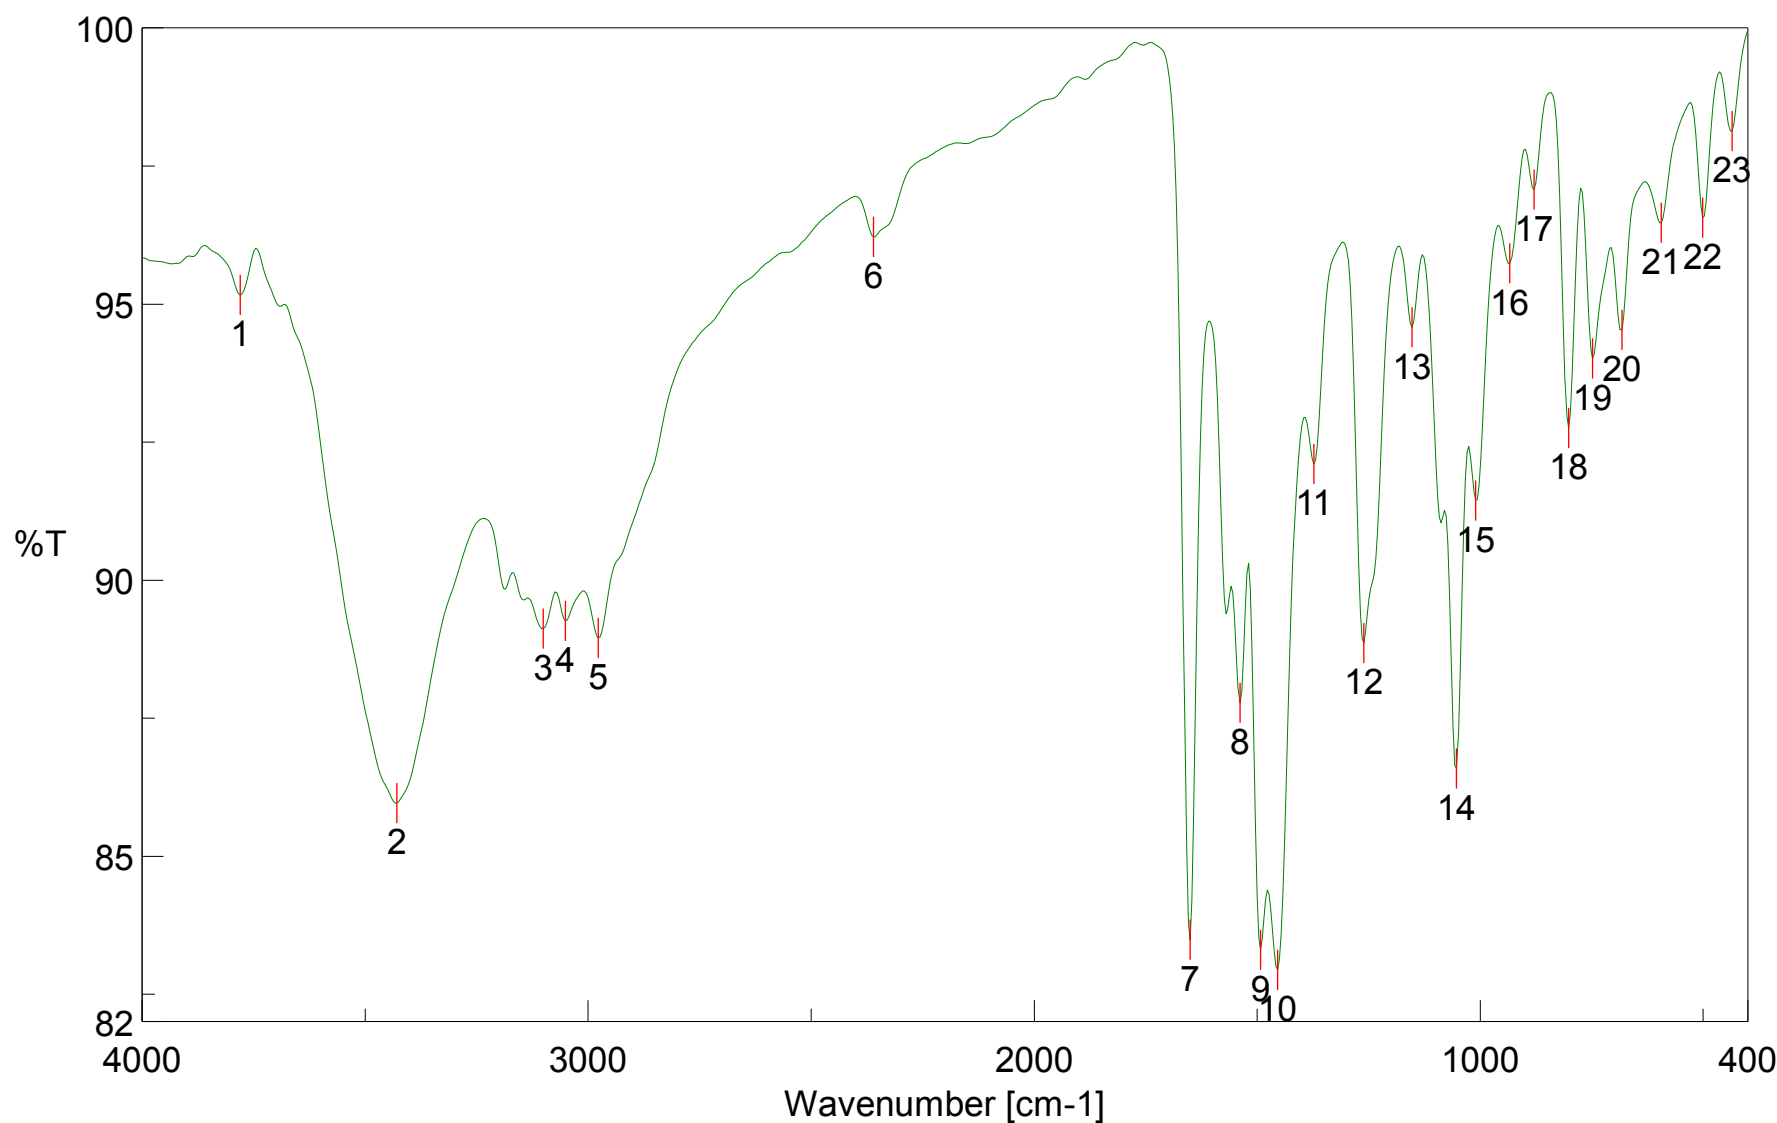

[ Result of Peak Picking ]

| No. | Position | Intensity | No. | Position | Intensity | No. | Position | Intensity |
|-----|----------|-----------|-----|----------|-----------|-----|----------|-----------|
| 1   | 3779.8   | 95.1645   | 2   | 3428.81  | 85.958    | 3   | 3100.97  | 89.1157   |
| 4   | 3050.83  | 89.2559   | 5   | 2977.55  | 88.9475   | 6   | 2360.44  | 96.2124   |
| 7   | 1650.77  | 83.4828   | 8   | 1538.92  | 87.777    | 9   | 1492.63  | 83.3021   |
| 10  | 1454.06  | 82.9384   | 11  | 1373.07  | 92.0976   | 12  | 1261.22  | 88.8558   |
| 13  | 1153.22  | 94.571    | 14  | 1052.94  | 86.5842   | 15  | 1010.52  | 91.4349   |
| 16  | 933.378  | 95.7351   | 17  | 879.381  | 97.0685   | 18  | 802.242  | 92.7491   |
| 19  | 748.245  | 94.0139   | 20  | 682.677  | 94.5299   | 21  | 593.968  | 96.4663   |
| 22  | 501.401  | 96.5614   | 23  | 435.834  | 98.1283   |     |          |           |
