# Supplementary material for: A Simple and Efficient Multicomponent Synthesis of Novel Pyrazole, N-aminopyridine and Pyrazolo[3,4-b]Pyridine Derivatives in Water
Source: Preprints.org preprint supplement (doi:10.20944/preprints202312.1232.v1), 2023-12-28
Supplement: Supplementary file 90 [file supplementary]

RT: 0.00 - 4.18

NL:  
1.95E6  
TIC MS  
Selwan-60

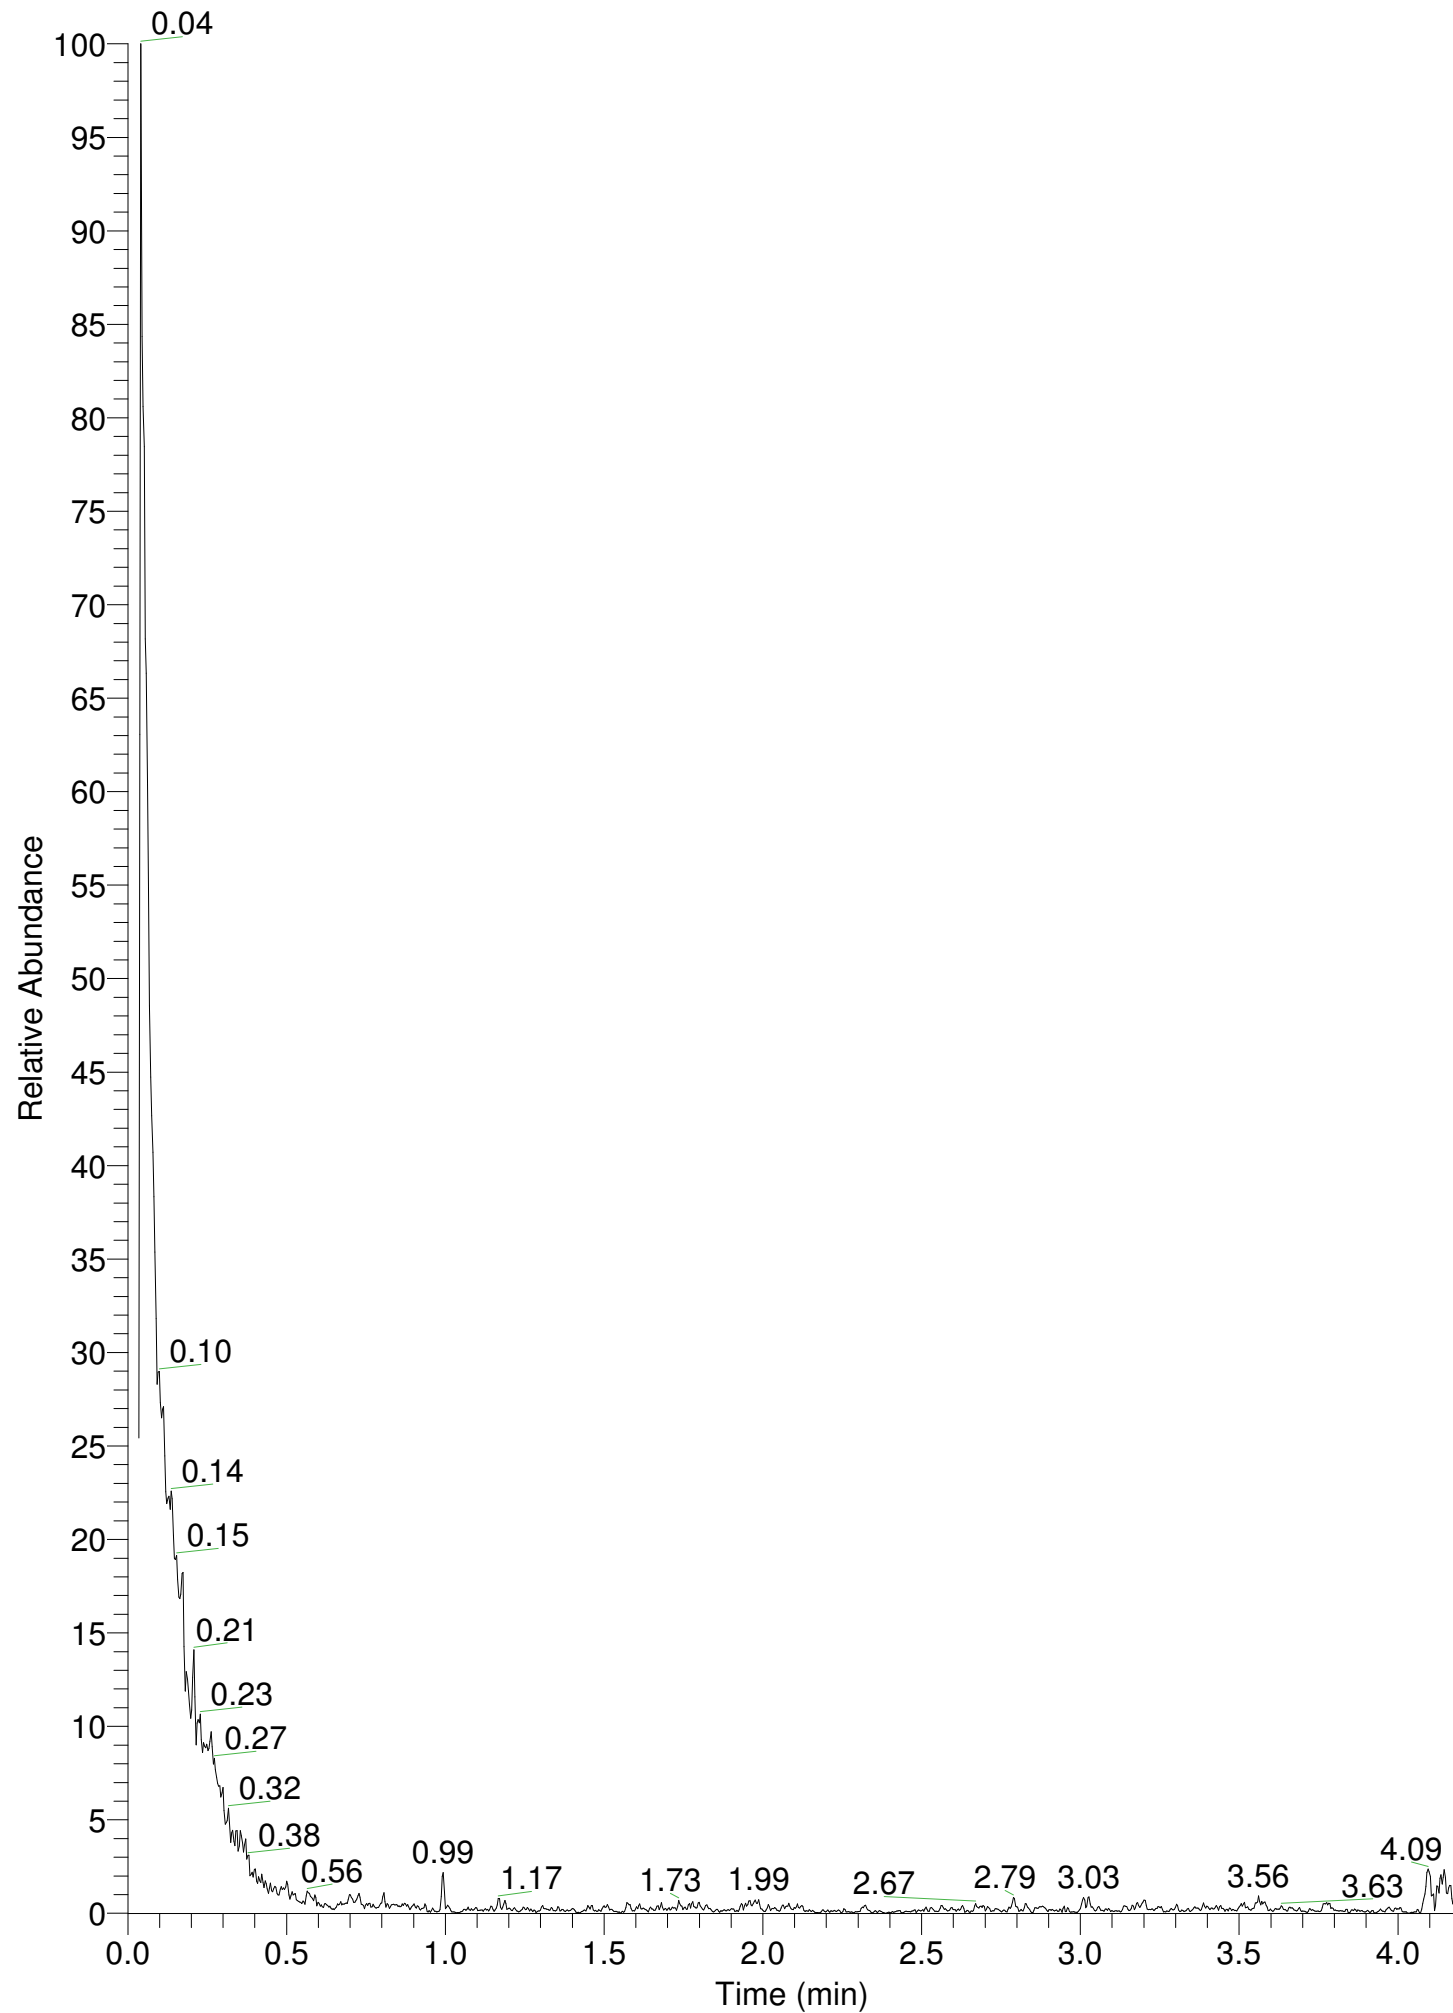

Selwan-60 #59 RT: 0.23 AV: 1 NL: 3.22E4

T: {0,0} + c EI Full ms [50.00-1000.00]

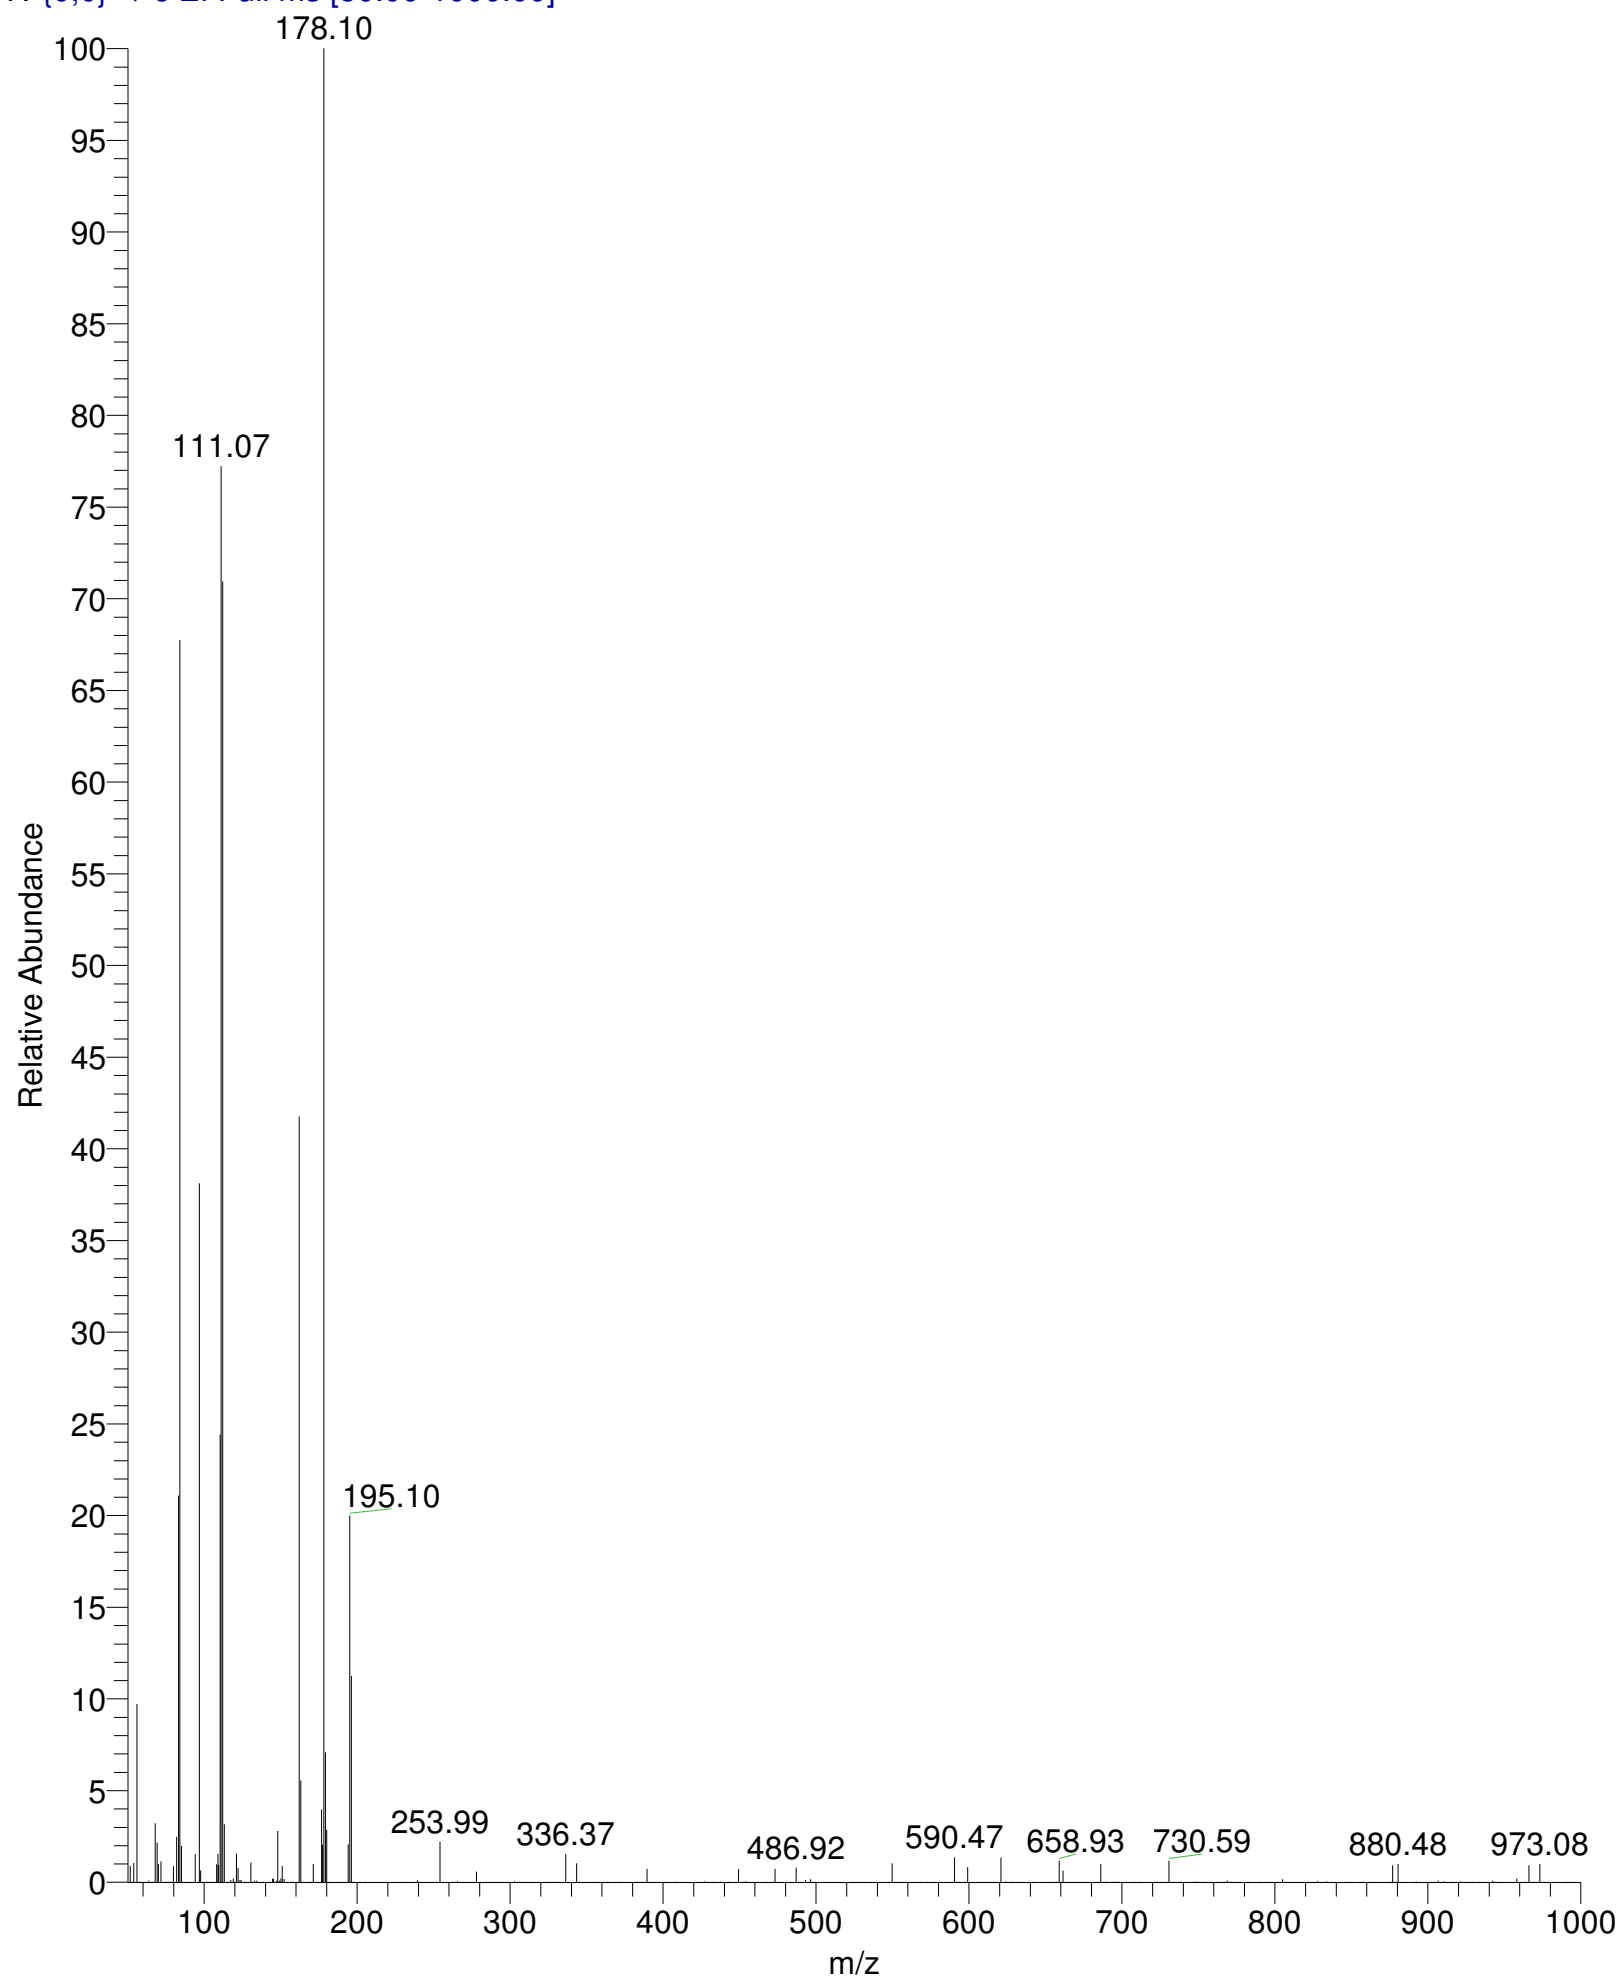

Selwan-60#59 RT: 0.23

T: {0,0} + c EI Full ms [50.00-1000.00]

m/z= 50.00-1000.04

| m/z    | Intensity | Relative |
|--------|-----------|----------|
| 50.18  | 0.0       | 0.00     |
| 51.56  | 281.8     | 0.88     |
| 52.55  | 0.0       | 0.00     |
| 53.30  | 2.8       | 0.01     |
| 53.92  | 331.8     | 1.03     |
| 54.71  | 0.0       | 0.00     |
| 55.99  | 3124.4    | 9.71     |
| 56.72  | 0.0       | 0.00     |
| 57.56  | 0.0       | 0.00     |
| 58.43  | 0.0       | 0.00     |
| 58.97  | 0.0       | 0.00     |
| 59.65  | 0.4       | 0.00     |
| 60.17  | 0.0       | 0.00     |
| 60.72  | 0.0       | 0.00     |
| 61.42  | 0.0       | 0.00     |
| 62.78  | 0.0       | 0.00     |
| 63.70  | 25.9      | 0.08     |
| 64.70  | 0.0       | 0.00     |
| 65.78  | 0.0       | 0.00     |
| 66.30  | 0.0       | 0.00     |
| 67.31  | 0.1       | 0.00     |
| 67.98  | 1028.6    | 3.20     |
| 69.13  | 692.4     | 2.15     |
| 69.97  | 318.6     | 0.99     |
| 70.96  | 0.0       | 0.00     |
| 71.68  | 360.7     | 1.12     |
| 73.09  | 0.1       | 0.00     |
| 74.70  | 1.0       | 0.00     |
| 75.36  | 0.0       | 0.00     |
| 76.33  | 0.1       | 0.00     |
| 77.15  | 0.0       | 0.00     |
| 77.90  | 0.0       | 0.00     |
| 78.70  | 0.3       | 0.00     |
| 79.26  | 1.9       | 0.01     |
| 79.88  | 279.9     | 0.87     |
| 80.93  | 5.2       | 0.02     |
| 81.83  | 796.3     | 2.47     |
| 83.08  | 6781.7    | 21.07    |
| 84.01  | 21800.0   | 67.73    |
| 85.00  | 636.6     | 1.98     |
| 85.93  | 0.0       | 0.00     |
| 86.87  | 0.0       | 0.00     |
| 88.17  | 0.1       | 0.00     |
| 89.12  | 0.0       | 0.00     |
| 89.83  | 0.0       | 0.00     |
| 90.49  | 0.2       | 0.00     |
| 91.75  | 0.1       | 0.00     |
| 92.38  | 0.0       | 0.00     |
| 93.97  | 491.6     | 1.53     |
| 96.84  | 12263.4   | 38.10    |
| 97.52  | 207.2     | 0.64     |
| 98.82  | 0.3       | 0.00     |
| 99.50  | 0.0       | 0.00     |
| 100.15 | 0.0       | 0.00     |
| 101.46 | 0.0       | 0.00     |

Selwan-60#59 RT: 0.23

T: {0,0} + c EI Full ms [50.00-1000.00]

m/z= 50.00-1000.04

| m/z    | Intensity | Relative |
|--------|-----------|----------|
| 101.97 | 0.0       | 0.00     |
| 102.61 | 0.0       | 0.00     |
| 103.43 | 0.0       | 0.00     |
| 104.20 | 0.0       | 0.00     |
| 105.07 | 0.0       | 0.00     |
| 105.60 | 0.0       | 0.00     |
| 106.39 | 0.0       | 0.00     |
| 107.31 | 0.0       | 0.00     |
| 108.09 | 314.4     | 0.98     |
| 108.88 | 496.5     | 1.54     |
| 109.39 | 302.7     | 0.94     |
| 110.40 | 7852.8    | 24.40    |
| 111.07 | 24854.6   | 77.22    |
| 112.05 | 22830.7   | 70.94    |
| 113.07 | 1016.3    | 3.16     |
| 114.25 | 0.0       | 0.00     |
| 115.28 | 0.0       | 0.00     |
| 116.05 | 0.0       | 0.00     |
| 117.36 | 37.9      | 0.12     |
| 117.93 | 0.0       | 0.00     |
| 118.86 | 60.2      | 0.19     |
| 119.57 | 0.0       | 0.00     |
| 120.07 | 0.0       | 0.00     |
| 121.11 | 497.2     | 1.54     |
| 122.00 | 244.6     | 0.76     |
| 123.25 | 34.3      | 0.11     |
| 124.12 | 30.0      | 0.09     |
| 125.28 | 1.6       | 0.00     |
| 126.00 | 0.0       | 0.00     |
| 126.80 | 0.0       | 0.00     |
| 127.67 | 0.0       | 0.00     |
| 128.34 | 0.0       | 0.00     |
| 128.88 | 0.0       | 0.00     |
| 130.34 | 337.2     | 1.05     |
| 131.99 | 1.6       | 0.00     |
| 132.90 | 24.9      | 0.08     |
| 134.17 | 25.4      | 0.08     |
| 135.00 | 0.2       | 0.00     |
| 137.44 | 0.1       | 0.00     |
| 138.04 | 0.0       | 0.00     |
| 138.59 | 0.0       | 0.00     |
| 139.49 | 0.0       | 0.00     |
| 140.61 | 0.0       | 0.00     |
| 141.79 | 0.0       | 0.00     |
| 143.05 | 0.0       | 0.00     |
| 143.66 | 0.0       | 0.00     |
| 144.60 | 61.3      | 0.19     |
| 145.27 | 57.2      | 0.18     |
| 146.44 | 0.0       | 0.00     |
| 147.33 | 27.5      | 0.09     |
| 147.97 | 897.5     | 2.79     |
| 149.05 | 24.0      | 0.07     |
| 150.20 | 62.6      | 0.19     |
| 150.89 | 282.9     | 0.88     |
| 151.47 | 0.3       | 0.00     |

Selwan-60#59 RT: 0.23

T: {0,0} + c EI Full ms [50.00-1000.00]

m/z= 50.00-1000.04

| m/z    | Intensity | Relative |
|--------|-----------|----------|
| 152.16 | 53.8      | 0.17     |
| 152.78 | 0.1       | 0.00     |
| 154.21 | 0.0       | 0.00     |
| 156.36 | 0.0       | 0.00     |
| 157.22 | 0.0       | 0.00     |
| 157.87 | 0.0       | 0.00     |
| 158.44 | 0.0       | 0.00     |
| 158.97 | 0.1       | 0.00     |
| 160.04 | 0.0       | 0.00     |
| 162.04 | 13439.3   | 41.76    |
| 163.00 | 1783.1    | 5.54     |
| 163.71 | 0.2       | 0.00     |
| 164.38 | 1.0       | 0.00     |
| 165.19 | 0.0       | 0.00     |
| 166.71 | 0.0       | 0.00     |
| 167.93 | 0.0       | 0.00     |
| 168.45 | 0.0       | 0.00     |
| 169.13 | 0.0       | 0.00     |
| 169.80 | 0.0       | 0.00     |
| 170.65 | 0.2       | 0.00     |
| 171.16 | 316.6     | 0.98     |
| 171.77 | 0.0       | 0.00     |
| 172.38 | 0.0       | 0.00     |
| 174.01 | 0.0       | 0.00     |
| 174.70 | 0.2       | 0.00     |
| 176.68 | 1271.8    | 3.95     |
| 177.31 | 655.7     | 2.04     |
| 178.10 | 32185.4   | 100.00   |
| 179.18 | 2279.9    | 7.08     |
| 179.97 | 919.6     | 2.86     |
| 181.18 | 0.0       | 0.00     |
| 181.70 | 0.0       | 0.00     |
| 183.32 | 0.0       | 0.00     |
| 187.22 | 0.0       | 0.00     |
| 187.81 | 0.0       | 0.00     |
| 188.86 | 1.4       | 0.00     |
| 189.80 | 1.0       | 0.00     |
| 190.68 | 0.2       | 0.00     |
| 191.46 | 0.0       | 0.00     |
| 192.33 | 0.1       | 0.00     |
| 193.26 | 1.3       | 0.00     |
| 194.09 | 657.8     | 2.04     |
| 195.10 | 6434.5    | 19.99    |
| 196.14 | 3617.7    | 11.24    |
| 196.81 | 0.0       | 0.00     |
| 197.43 | 0.0       | 0.00     |
| 198.16 | 0.0       | 0.00     |
| 198.82 | 0.0       | 0.00     |
| 201.48 | 0.0       | 0.00     |
| 202.18 | 0.0       | 0.00     |
| 204.72 | 0.0       | 0.00     |
| 205.40 | 0.0       | 0.00     |
| 206.21 | 0.0       | 0.00     |
| 207.39 | 0.0       | 0.00     |
| 209.68 | 0.0       | 0.00     |

Selwan-60#59 RT: 0.23

T: {0,0} + c EI Full ms [50.00-1000.00]

m/z= 50.00-1000.04

| m/z    | Intensity | Relative |
|--------|-----------|----------|
| 211.80 | 0.0       | 0.00     |
| 212.46 | 0.0       | 0.00     |
| 215.57 | 0.0       | 0.00     |
| 216.95 | 0.0       | 0.00     |
| 218.21 | 0.0       | 0.00     |
| 219.22 | 0.0       | 0.00     |
| 219.82 | 0.0       | 0.00     |
| 220.89 | 0.0       | 0.00     |
| 224.32 | 0.0       | 0.00     |
| 225.58 | 0.0       | 0.00     |
| 226.79 | 0.0       | 0.00     |
| 228.14 | 0.0       | 0.00     |
| 229.61 | 0.0       | 0.00     |
| 230.23 | 0.0       | 0.00     |
| 231.75 | 0.0       | 0.00     |
| 232.95 | 0.0       | 0.00     |
| 234.13 | 0.0       | 0.00     |
| 236.20 | 0.1       | 0.00     |
| 238.20 | 0.0       | 0.00     |
| 238.82 | 0.4       | 0.00     |
| 239.41 | 29.7      | 0.09     |
| 240.27 | 0.0       | 0.00     |
| 241.09 | 0.0       | 0.00     |
| 241.97 | 0.0       | 0.00     |
| 243.30 | 0.0       | 0.00     |
| 244.58 | 0.0       | 0.00     |
| 246.26 | 0.0       | 0.00     |
| 247.06 | 0.0       | 0.00     |
| 248.27 | 0.0       | 0.00     |
| 249.33 | 0.0       | 0.00     |
| 251.73 | 0.0       | 0.00     |
| 253.99 | 703.8     | 2.19     |
| 255.37 | 0.0       | 0.00     |
| 256.36 | 0.0       | 0.00     |
| 258.25 | 0.0       | 0.00     |
| 259.21 | 0.0       | 0.00     |
| 261.71 | 1.0       | 0.00     |
| 262.42 | 0.0       | 0.00     |
| 263.33 | 0.0       | 0.00     |
| 264.04 | 0.0       | 0.00     |
| 265.64 | 19.9      | 0.06     |
| 266.77 | 0.0       | 0.00     |
| 268.67 | 0.0       | 0.00     |
| 269.20 | 0.0       | 0.00     |
| 269.81 | 0.0       | 0.00     |
| 272.33 | 0.0       | 0.00     |
| 273.19 | 0.0       | 0.00     |
| 274.61 | 0.0       | 0.00     |
| 275.34 | 0.0       | 0.00     |
| 276.95 | 0.0       | 0.00     |
| 277.85 | 184.5     | 0.57     |
| 279.47 | 1.0       | 0.00     |
| 282.10 | 0.5       | 0.00     |
| 284.12 | 0.0       | 0.00     |
| 285.31 | 0.0       | 0.00     |

Selwan-60#59 RT: 0.23

T: {0,0} + c EI Full ms [50.00-1000.00]

m/z= 50.00-1000.04

| m/z    | Intensity | Relative |
|--------|-----------|----------|
| 285.93 | 0.0       | 0.00     |
| 286.65 | 0.0       | 0.00     |
| 287.60 | 0.0       | 0.00     |
| 289.29 | 0.0       | 0.00     |
| 290.60 | 0.0       | 0.00     |
| 291.43 | 0.0       | 0.00     |
| 292.06 | 0.1       | 0.00     |
| 293.08 | 0.0       | 0.00     |
| 294.13 | 0.0       | 0.00     |
| 295.52 | 0.0       | 0.00     |
| 297.21 | 0.0       | 0.00     |
| 298.56 | 0.0       | 0.00     |
| 299.22 | 0.0       | 0.00     |
| 300.54 | 0.0       | 0.00     |
| 301.16 | 0.0       | 0.00     |
| 302.78 | 15.2      | 0.05     |
| 304.29 | 0.0       | 0.00     |
| 306.00 | 1.6       | 0.00     |
| 306.51 | 0.0       | 0.00     |
| 307.89 | 0.2       | 0.00     |
| 309.06 | 0.0       | 0.00     |
| 310.67 | 1.0       | 0.00     |
| 311.19 | 0.0       | 0.00     |
| 312.85 | 0.0       | 0.00     |
| 314.36 | 0.0       | 0.00     |
| 315.11 | 0.0       | 0.00     |
| 317.85 | 0.0       | 0.00     |
| 318.66 | 0.0       | 0.00     |
| 319.45 | 0.0       | 0.00     |
| 323.57 | 0.0       | 0.00     |
| 324.56 | 0.0       | 0.00     |
| 325.37 | 0.0       | 0.00     |
| 326.07 | 0.0       | 0.00     |
| 327.25 | 0.0       | 0.00     |
| 327.77 | 0.0       | 0.00     |
| 329.21 | 0.0       | 0.00     |
| 330.13 | 0.0       | 0.00     |
| 330.64 | 0.0       | 0.00     |
| 331.19 | 0.0       | 0.00     |
| 332.16 | 0.0       | 0.00     |
| 335.33 | 0.1       | 0.00     |
| 336.37 | 492.8     | 1.53     |
| 338.06 | 0.0       | 0.00     |
| 338.94 | 0.0       | 0.00     |
| 343.43 | 329.4     | 1.02     |
| 344.30 | 1.6       | 0.00     |
| 345.40 | 0.0       | 0.00     |
| 345.91 | 0.0       | 0.00     |
| 346.45 | 0.0       | 0.00     |
| 347.18 | 0.0       | 0.00     |
| 349.04 | 0.0       | 0.00     |
| 351.42 | 0.0       | 0.00     |
| 353.20 | 0.0       | 0.00     |
| 353.86 | 0.0       | 0.00     |
| 355.39 | 0.0       | 0.00     |

Selwan-60#59 RT: 0.23

T: {0,0} + c EI Full ms [50.00-1000.00]

m/z= 50.00-1000.04

| m/z    | Intensity | Relative |
|--------|-----------|----------|
| 356.53 | 0.0       | 0.00     |
| 357.05 | 0.0       | 0.00     |
| 358.22 | 0.0       | 0.00     |
| 359.04 | 0.0       | 0.00     |
| 359.86 | 0.0       | 0.00     |
| 360.83 | 0.0       | 0.00     |
| 361.83 | 0.0       | 0.00     |
| 363.04 | 0.0       | 0.00     |
| 363.72 | 0.0       | 0.00     |
| 364.94 | 0.0       | 0.00     |
| 367.72 | 0.0       | 0.00     |
| 368.44 | 0.0       | 0.00     |
| 369.31 | 0.4       | 0.00     |
| 370.86 | 0.0       | 0.00     |
| 371.49 | 0.0       | 0.00     |
| 372.01 | 0.0       | 0.00     |
| 373.01 | 1.6       | 0.00     |
| 373.61 | 0.0       | 0.00     |
| 375.30 | 1.0       | 0.00     |
| 377.49 | 0.0       | 0.00     |
| 378.75 | 0.0       | 0.00     |
| 380.08 | 0.0       | 0.00     |
| 381.62 | 0.0       | 0.00     |
| 382.51 | 0.0       | 0.00     |
| 383.41 | 1.9       | 0.01     |
| 384.32 | 0.0       | 0.00     |
| 385.27 | 0.0       | 0.00     |
| 386.16 | 0.0       | 0.00     |
| 387.10 | 0.0       | 0.00     |
| 388.39 | 0.0       | 0.00     |
| 389.50 | 231.9     | 0.72     |
| 390.30 | 0.0       | 0.00     |
| 391.18 | 0.0       | 0.00     |
| 392.31 | 0.0       | 0.00     |
| 392.91 | 0.0       | 0.00     |
| 394.32 | 0.4       | 0.00     |
| 395.06 | 0.4       | 0.00     |
| 396.00 | 0.0       | 0.00     |
| 397.90 | 0.0       | 0.00     |
| 399.71 | 0.0       | 0.00     |
| 400.92 | 0.0       | 0.00     |
| 402.00 | 0.0       | 0.00     |
| 402.90 | 0.0       | 0.00     |
| 403.90 | 0.0       | 0.00     |
| 407.42 | 1.6       | 0.00     |
| 407.93 | 0.0       | 0.00     |
| 408.84 | 0.0       | 0.00     |
| 409.68 | 0.0       | 0.00     |
| 410.25 | 0.0       | 0.00     |
| 411.90 | 0.0       | 0.00     |
| 412.57 | 0.0       | 0.00     |
| 413.71 | 0.0       | 0.00     |
| 415.94 | 0.0       | 0.00     |
| 416.97 | 0.0       | 0.00     |
| 420.54 | 0.0       | 0.00     |

Selwan-60#59 RT: 0.23

T: {0,0} + c EI Full ms [50.00-1000.00]

m/z= 50.00-1000.04

| m/z    | Intensity | Relative |
|--------|-----------|----------|
| 423.62 | 0.0       | 0.00     |
| 424.37 | 2.2       | 0.01     |
| 426.96 | 14.9      | 0.05     |
| 427.96 | 0.1       | 0.00     |
| 428.61 | 0.0       | 0.00     |
| 429.16 | 0.0       | 0.00     |
| 430.30 | 0.0       | 0.00     |
| 431.11 | 0.0       | 0.00     |
| 431.91 | 0.0       | 0.00     |
| 432.57 | 0.0       | 0.00     |
| 433.16 | 0.0       | 0.00     |
| 433.98 | 0.0       | 0.00     |
| 434.66 | 0.0       | 0.00     |
| 437.64 | 10.2      | 0.03     |
| 439.00 | 0.0       | 0.00     |
| 439.80 | 0.0       | 0.00     |
| 441.58 | 0.0       | 0.00     |
| 442.73 | 0.0       | 0.00     |
| 443.54 | 7.8       | 0.02     |
| 446.87 | 0.0       | 0.00     |
| 447.77 | 0.0       | 0.00     |
| 449.35 | 226.9     | 0.70     |
| 451.70 | 0.0       | 0.00     |
| 452.69 | 0.0       | 0.00     |
| 454.13 | 13.0      | 0.04     |
| 455.30 | 0.0       | 0.00     |
| 455.89 | 0.0       | 0.00     |
| 459.00 | 0.0       | 0.00     |
| 460.88 | 0.0       | 0.00     |
| 461.46 | 0.0       | 0.00     |
| 462.74 | 0.0       | 0.00     |
| 465.62 | 0.0       | 0.00     |
| 466.25 | 0.0       | 0.00     |
| 467.45 | 0.0       | 0.00     |
| 468.29 | 0.0       | 0.00     |
| 469.32 | 0.0       | 0.00     |
| 471.15 | 0.0       | 0.00     |
| 472.29 | 1.6       | 0.00     |
| 473.13 | 232.4     | 0.72     |
| 473.99 | 0.0       | 0.00     |
| 475.96 | 0.0       | 0.00     |
| 478.62 | 0.0       | 0.00     |
| 480.02 | 0.0       | 0.00     |
| 480.69 | 0.0       | 0.00     |
| 482.04 | 0.0       | 0.00     |
| 483.83 | 0.0       | 0.00     |
| 486.92 | 256.6     | 0.80     |
| 487.54 | 0.0       | 0.00     |
| 488.55 | 0.0       | 0.00     |
| 489.54 | 0.0       | 0.00     |
| 492.97 | 38.9      | 0.12     |
| 493.48 | 0.0       | 0.00     |
| 494.60 | 1.0       | 0.00     |
| 495.25 | 0.0       | 0.00     |
| 496.34 | 50.1      | 0.16     |

Selwan-60#59 RT: 0.23

T: {0,0} + c EI Full ms [50.00-1000.00]

m/z= 50.00-1000.04

| m/z    | Intensity | Relative |
|--------|-----------|----------|
| 497.33 | 0.2       | 0.00     |
| 497.99 | 0.0       | 0.00     |
| 498.69 | 2.1       | 0.01     |
| 499.26 | 0.0       | 0.00     |
| 500.93 | 0.0       | 0.00     |
| 505.11 | 0.0       | 0.00     |
| 505.94 | 0.0       | 0.00     |
| 507.29 | 0.0       | 0.00     |
| 509.63 | 0.1       | 0.00     |
| 510.95 | 0.0       | 0.00     |
| 512.16 | 0.0       | 0.00     |
| 513.04 | 2.5       | 0.01     |
| 514.15 | 0.0       | 0.00     |
| 515.96 | 0.2       | 0.00     |
| 518.04 | 0.0       | 0.00     |
| 523.15 | 0.4       | 0.00     |
| 523.92 | 0.0       | 0.00     |
| 524.43 | 0.0       | 0.00     |
| 524.93 | 0.0       | 0.00     |
| 526.75 | 0.0       | 0.00     |
| 528.01 | 0.0       | 0.00     |
| 529.29 | 0.4       | 0.00     |
| 529.81 | 0.0       | 0.00     |
| 530.50 | 0.0       | 0.00     |
| 531.59 | 1.6       | 0.00     |
| 533.16 | 0.0       | 0.00     |
| 535.23 | 0.3       | 0.00     |
| 535.90 | 0.0       | 0.00     |
| 536.69 | 0.1       | 0.00     |
| 539.27 | 1.9       | 0.01     |
| 539.79 | 0.0       | 0.00     |
| 541.41 | 0.0       | 0.00     |
| 543.87 | 1.3       | 0.00     |
| 546.70 | 0.0       | 0.00     |
| 547.52 | 0.0       | 0.00     |
| 548.23 | 0.3       | 0.00     |
| 549.79 | 326.7     | 1.02     |
| 551.49 | 1.9       | 0.01     |
| 552.49 | 0.0       | 0.00     |
| 553.26 | 0.0       | 0.00     |
| 554.64 | 0.0       | 0.00     |
| 555.36 | 0.0       | 0.00     |
| 556.04 | 0.0       | 0.00     |
| 556.90 | 0.0       | 0.00     |
| 558.51 | 0.0       | 0.00     |
| 559.99 | 0.0       | 0.00     |
| 561.56 | 0.0       | 0.00     |
| 564.41 | 0.0       | 0.00     |
| 566.21 | 0.2       | 0.00     |
| 567.29 | 0.0       | 0.00     |
| 568.10 | 0.0       | 0.00     |
| 568.69 | 0.0       | 0.00     |
| 570.30 | 0.0       | 0.00     |
| 571.68 | 0.0       | 0.00     |
| 572.29 | 0.0       | 0.00     |

Selwan-60#59 RT: 0.23

T: {0,0} + c EI Full ms [50.00-1000.00]

m/z= 50.00-1000.04

| m/z    | Intensity | Relative |
|--------|-----------|----------|
| 572.92 | 1.3       | 0.00     |
| 575.23 | 0.0       | 0.00     |
| 577.65 | 0.0       | 0.00     |
| 578.24 | 0.0       | 0.00     |
| 580.27 | 0.0       | 0.00     |
| 581.16 | 0.0       | 0.00     |
| 581.85 | 0.0       | 0.00     |
| 582.83 | 0.0       | 0.00     |
| 583.95 | 0.0       | 0.00     |
| 586.34 | 1.6       | 0.00     |
| 588.56 | 0.0       | 0.00     |
| 589.41 | 0.0       | 0.00     |
| 589.92 | 0.0       | 0.00     |
| 590.47 | 437.2     | 1.36     |
| 591.23 | 0.0       | 0.00     |
| 592.19 | 0.0       | 0.00     |
| 592.96 | 0.0       | 0.00     |
| 593.90 | 0.0       | 0.00     |
| 595.78 | 0.0       | 0.00     |
| 597.35 | 0.0       | 0.00     |
| 598.30 | 0.0       | 0.00     |
| 599.17 | 259.8     | 0.81     |
| 600.06 | 0.1       | 0.00     |
| 601.37 | 0.0       | 0.00     |
| 602.18 | 0.0       | 0.00     |
| 604.32 | 0.0       | 0.00     |
| 605.46 | 0.0       | 0.00     |
| 606.58 | 0.0       | 0.00     |
| 607.23 | 0.0       | 0.00     |
| 609.38 | 0.0       | 0.00     |
| 609.93 | 0.0       | 0.00     |
| 611.29 | 1.6       | 0.00     |
| 612.02 | 0.0       | 0.00     |
| 613.08 | 0.0       | 0.00     |
| 613.78 | 1.6       | 0.00     |
| 615.18 | 1.6       | 0.00     |
| 615.90 | 0.0       | 0.00     |
| 616.94 | 0.1       | 0.00     |
| 618.98 | 0.0       | 0.00     |
| 620.25 | 0.0       | 0.00     |
| 620.82 | 432.3     | 1.34     |
| 623.74 | 10.8      | 0.03     |
| 624.59 | 0.0       | 0.00     |
| 627.00 | 0.0       | 0.00     |
| 627.50 | 0.0       | 0.00     |
| 628.19 | 0.0       | 0.00     |
| 628.99 | 0.0       | 0.00     |
| 629.64 | 0.0       | 0.00     |
| 632.01 | 0.0       | 0.00     |
| 633.01 | 0.0       | 0.00     |
| 634.13 | 0.0       | 0.00     |
| 635.13 | 0.0       | 0.00     |
| 636.16 | 0.1       | 0.00     |
| 638.20 | 0.0       | 0.00     |
| 639.10 | 0.0       | 0.00     |

Selwan-60#59 RT: 0.23

T: {0,0} + c EI Full ms [50.00-1000.00]

m/z= 50.00-1000.04

| m/z    | Intensity | Relative |
|--------|-----------|----------|
| 639.63 | 0.0       | 0.00     |
| 641.79 | 0.0       | 0.00     |
| 642.79 | 0.0       | 0.00     |
| 647.66 | 0.0       | 0.00     |
| 648.67 | 0.0       | 0.00     |
| 649.86 | 0.0       | 0.00     |
| 650.73 | 0.0       | 0.00     |
| 652.88 | 0.0       | 0.00     |
| 654.41 | 0.0       | 0.00     |
| 655.48 | 2.2       | 0.01     |
| 656.03 | 0.0       | 0.00     |
| 657.03 | 0.0       | 0.00     |
| 657.64 | 0.0       | 0.00     |
| 658.93 | 376.0     | 1.17     |
| 660.08 | 0.0       | 0.00     |
| 661.34 | 197.6     | 0.61     |
| 662.88 | 0.0       | 0.00     |
| 663.40 | 0.0       | 0.00     |
| 663.97 | 0.0       | 0.00     |
| 664.93 | 0.0       | 0.00     |
| 665.68 | 0.0       | 0.00     |
| 666.78 | 0.0       | 0.00     |
| 667.93 | 0.0       | 0.00     |
| 668.60 | 0.0       | 0.00     |
| 669.32 | 0.0       | 0.00     |
| 670.07 | 1.3       | 0.00     |
| 671.08 | 0.0       | 0.00     |
| 672.38 | 0.0       | 0.00     |
| 673.58 | 0.0       | 0.00     |
| 674.56 | 0.0       | 0.00     |
| 675.79 | 0.0       | 0.00     |
| 676.69 | 0.0       | 0.00     |
| 677.21 | 0.0       | 0.00     |
| 678.90 | 0.0       | 0.00     |
| 679.72 | 0.0       | 0.00     |
| 681.36 | 0.0       | 0.00     |
| 683.25 | 1.6       | 0.00     |
| 684.54 | 1.9       | 0.01     |
| 685.59 | 0.0       | 0.00     |
| 686.21 | 317.7     | 0.99     |
| 688.34 | 0.0       | 0.00     |
| 688.85 | 0.0       | 0.00     |
| 690.08 | 11.0      | 0.03     |
| 692.55 | 1.0       | 0.00     |
| 693.40 | 0.0       | 0.00     |
| 693.91 | 0.0       | 0.00     |
| 695.22 | 8.4       | 0.03     |
| 696.56 | 1.3       | 0.00     |
| 697.35 | 0.0       | 0.00     |
| 698.24 | 0.1       | 0.00     |
| 699.73 | 1.0       | 0.00     |
| 701.71 | 0.0       | 0.00     |
| 703.05 | 0.0       | 0.00     |
| 705.21 | 0.0       | 0.00     |
| 707.36 | 0.0       | 0.00     |

Selwan-60#59 RT: 0.23

T: {0,0} + c EI Full ms [50.00-1000.00]

m/z= 50.00-1000.04

| m/z    | Intensity | Relative |
|--------|-----------|----------|
| 708.22 | 0.0       | 0.00     |
| 708.99 | 0.0       | 0.00     |
| 710.55 | 0.0       | 0.00     |
| 711.28 | 0.0       | 0.00     |
| 712.25 | 0.0       | 0.00     |
| 715.01 | 0.0       | 0.00     |
| 717.21 | 0.0       | 0.00     |
| 720.30 | 0.0       | 0.00     |
| 721.28 | 0.0       | 0.00     |
| 722.32 | 0.0       | 0.00     |
| 723.10 | 0.0       | 0.00     |
| 723.73 | 0.0       | 0.00     |
| 725.25 | 0.0       | 0.00     |
| 726.16 | 1.8       | 0.01     |
| 727.92 | 0.0       | 0.00     |
| 728.90 | 0.0       | 0.00     |
| 729.75 | 0.0       | 0.00     |
| 730.59 | 371.1     | 1.15     |
| 731.60 | 0.0       | 0.00     |
| 732.50 | 0.1       | 0.00     |
| 733.69 | 0.0       | 0.00     |
| 734.41 | 0.0       | 0.00     |
| 735.93 | 0.0       | 0.00     |
| 737.42 | 0.0       | 0.00     |
| 737.99 | 2.8       | 0.01     |
| 739.03 | 1.3       | 0.00     |
| 740.16 | 0.0       | 0.00     |
| 741.18 | 0.0       | 0.00     |
| 744.66 | 0.0       | 0.00     |
| 746.54 | 0.3       | 0.00     |
| 747.17 | 0.0       | 0.00     |
| 748.20 | 10.8      | 0.03     |
| 748.74 | 0.0       | 0.00     |
| 749.53 | 0.0       | 0.00     |
| 750.56 | 0.0       | 0.00     |
| 752.20 | 0.0       | 0.00     |
| 752.77 | 0.0       | 0.00     |
| 753.57 | 0.0       | 0.00     |
| 754.61 | 3.7       | 0.01     |
| 756.08 | 0.0       | 0.00     |
| 757.10 | 0.0       | 0.00     |
| 758.09 | 0.0       | 0.00     |
| 758.91 | 0.0       | 0.00     |
| 761.82 | 0.0       | 0.00     |
| 762.49 | 0.0       | 0.00     |
| 763.51 | 0.0       | 0.00     |
| 764.96 | 0.0       | 0.00     |
| 765.84 | 1.8       | 0.01     |
| 766.51 | 0.0       | 0.00     |
| 767.18 | 0.0       | 0.00     |
| 767.85 | 1.3       | 0.00     |
| 768.67 | 26.3      | 0.08     |
| 769.24 | 0.0       | 0.00     |
| 769.94 | 0.0       | 0.00     |
| 770.49 | 0.0       | 0.00     |

Selwan-60#59 RT: 0.23

T: {0,0} + c EI Full ms [50.00-1000.00]

m/z= 50.00-1000.04

| m/z    | Intensity | Relative |
|--------|-----------|----------|
| 771.70 | 0.0       | 0.00     |
| 772.26 | 0.0       | 0.00     |
| 773.34 | 0.0       | 0.00     |
| 774.17 | 0.0       | 0.00     |
| 775.93 | 0.0       | 0.00     |
| 776.46 | 0.0       | 0.00     |
| 777.33 | 0.0       | 0.00     |
| 778.15 | 0.0       | 0.00     |
| 779.93 | 0.0       | 0.00     |
| 780.48 | 0.0       | 0.00     |
| 781.62 | 0.0       | 0.00     |
| 782.76 | 0.0       | 0.00     |
| 783.36 | 0.0       | 0.00     |
| 784.26 | 0.0       | 0.00     |
| 787.05 | 1.8       | 0.01     |
| 788.79 | 0.0       | 0.00     |
| 789.66 | 0.0       | 0.00     |
| 790.25 | 0.0       | 0.00     |
| 790.91 | 0.0       | 0.00     |
| 793.71 | 0.7       | 0.00     |
| 795.03 | 0.0       | 0.00     |
| 796.12 | 0.0       | 0.00     |
| 796.83 | 0.0       | 0.00     |
| 798.31 | 0.1       | 0.00     |
| 800.52 | 0.0       | 0.00     |
| 801.69 | 0.0       | 0.00     |
| 803.09 | 0.1       | 0.00     |
| 803.63 | 0.0       | 0.00     |
| 804.90 | 45.8      | 0.14     |
| 805.83 | 0.0       | 0.00     |
| 807.92 | 0.0       | 0.00     |
| 809.04 | 0.0       | 0.00     |
| 811.11 | 0.0       | 0.00     |
| 812.29 | 0.0       | 0.00     |
| 813.20 | 0.1       | 0.00     |
| 814.57 | 0.1       | 0.00     |
| 815.84 | 0.0       | 0.00     |
| 817.54 | 0.0       | 0.00     |
| 819.18 | 0.0       | 0.00     |
| 820.48 | 0.0       | 0.00     |
| 821.04 | 0.0       | 0.00     |
| 821.76 | 0.0       | 0.00     |
| 822.42 | 0.0       | 0.00     |
| 824.45 | 1.9       | 0.01     |
| 826.04 | 0.0       | 0.00     |
| 827.84 | 14.8      | 0.05     |
| 828.38 | 0.0       | 0.00     |
| 831.19 | 0.0       | 0.00     |
| 832.14 | 0.0       | 0.00     |
| 833.84 | 13.0      | 0.04     |
| 834.73 | 0.0       | 0.00     |
| 837.41 | 0.0       | 0.00     |
| 844.15 | 0.0       | 0.00     |
| 846.00 | 0.0       | 0.00     |
| 847.08 | 0.0       | 0.00     |

Selwan-60#59 RT: 0.23

T: {0,0} + c EI Full ms [50.00-1000.00]

m/z= 50.00-1000.04

| m/z    | Intensity | Relative |
|--------|-----------|----------|
| 847.64 | 0.0       | 0.00     |
| 848.91 | 0.0       | 0.00     |
| 850.04 | 0.0       | 0.00     |
| 851.39 | 0.0       | 0.00     |
| 854.99 | 4.2       | 0.01     |
| 856.32 | 0.0       | 0.00     |
| 857.23 | 0.0       | 0.00     |
| 857.82 | 0.0       | 0.00     |
| 858.80 | 0.1       | 0.00     |
| 860.54 | 0.0       | 0.00     |
| 862.23 | 0.0       | 0.00     |
| 863.75 | 0.0       | 0.00     |
| 864.41 | 0.0       | 0.00     |
| 865.35 | 0.0       | 0.00     |
| 866.21 | 0.7       | 0.00     |
| 867.14 | 0.0       | 0.00     |
| 868.73 | 0.0       | 0.00     |
| 870.38 | 0.0       | 0.00     |
| 872.56 | 0.0       | 0.00     |
| 874.19 | 0.0       | 0.00     |
| 874.89 | 0.0       | 0.00     |
| 875.59 | 0.0       | 0.00     |
| 876.30 | 0.0       | 0.00     |
| 876.98 | 296.3     | 0.92     |
| 877.65 | 0.0       | 0.00     |
| 878.86 | 0.0       | 0.00     |
| 879.51 | 0.0       | 0.00     |
| 880.48 | 319.6     | 0.99     |
| 883.16 | 0.0       | 0.00     |
| 885.24 | 0.0       | 0.00     |
| 886.60 | 0.0       | 0.00     |
| 890.63 | 0.0       | 0.00     |
| 891.93 | 0.0       | 0.00     |
| 892.50 | 8.4       | 0.03     |
| 894.89 | 0.0       | 0.00     |
| 896.71 | 0.0       | 0.00     |
| 898.86 | 0.0       | 0.00     |
| 901.11 | 0.0       | 0.00     |
| 901.98 | 0.0       | 0.00     |
| 902.48 | 0.0       | 0.00     |
| 903.37 | 0.0       | 0.00     |
| 904.28 | 1.6       | 0.00     |
| 906.55 | 27.5      | 0.09     |
| 907.39 | 0.0       | 0.00     |
| 908.49 | 0.0       | 0.00     |
| 909.17 | 0.4       | 0.00     |
| 910.35 | 13.0      | 0.04     |
| 910.87 | 0.0       | 0.00     |
| 912.10 | 0.0       | 0.00     |
| 912.64 | 0.4       | 0.00     |
| 914.73 | 0.0       | 0.00     |
| 915.32 | 0.0       | 0.00     |
| 916.32 | 0.3       | 0.00     |
| 917.33 | 0.0       | 0.00     |
| 918.69 | 0.0       | 0.00     |

Selwan-60#59 RT: 0.23

T: {0,0} + c EI Full ms [50.00-1000.00]

m/z= 50.00-1000.04

| m/z    | Intensity | Relative |
|--------|-----------|----------|
| 921.01 | 13.3      | 0.04     |
| 921.75 | 0.0       | 0.00     |
| 923.36 | 0.0       | 0.00     |
| 924.48 | 0.0       | 0.00     |
| 925.88 | 0.0       | 0.00     |
| 926.61 | 0.0       | 0.00     |
| 927.69 | 0.0       | 0.00     |
| 928.60 | 0.0       | 0.00     |
| 929.46 | 0.0       | 0.00     |
| 929.97 | 0.0       | 0.00     |
| 931.83 | 0.0       | 0.00     |
| 933.17 | 0.0       | 0.00     |
| 933.71 | 0.0       | 0.00     |
| 934.65 | 0.0       | 0.00     |
| 936.43 | 0.0       | 0.00     |
| 937.59 | 0.0       | 0.00     |
| 939.40 | 0.0       | 0.00     |
| 940.32 | 0.0       | 0.00     |
| 942.40 | 24.8      | 0.08     |
| 943.44 | 0.0       | 0.00     |
| 944.15 | 0.0       | 0.00     |
| 946.06 | 0.0       | 0.00     |
| 946.62 | 0.0       | 0.00     |
| 948.18 | 0.0       | 0.00     |
| 948.69 | 0.0       | 0.00     |
| 950.16 | 0.0       | 0.00     |
| 953.70 | 0.0       | 0.00     |
| 956.01 | 0.3       | 0.00     |
| 957.58 | 0.0       | 0.00     |
| 958.11 | 60.3      | 0.19     |
| 959.05 | 1.0       | 0.00     |
| 959.59 | 0.0       | 0.00     |
| 961.20 | 0.0       | 0.00     |
| 961.73 | 0.0       | 0.00     |
| 962.66 | 0.0       | 0.00     |
| 963.56 | 0.0       | 0.00     |
| 964.15 | 0.0       | 0.00     |
| 966.03 | 295.8     | 0.92     |
| 967.02 | 0.1       | 0.00     |
| 968.48 | 0.0       | 0.00     |
| 969.26 | 0.0       | 0.00     |
| 970.17 | 0.0       | 0.00     |
| 971.11 | 0.0       | 0.00     |
| 972.32 | 0.0       | 0.00     |
| 973.08 | 316.1     | 0.98     |
| 974.32 | 0.0       | 0.00     |
| 975.84 | 0.1       | 0.00     |
| 976.43 | 0.0       | 0.00     |
| 977.80 | 0.0       | 0.00     |
| 978.63 | 0.0       | 0.00     |
| 979.42 | 0.9       | 0.00     |
| 983.47 | 1.6       | 0.00     |
| 985.07 | 0.0       | 0.00     |
| 988.43 | 0.0       | 0.00     |
| 990.26 | 0.0       | 0.00     |

Selwan-60#59 RT: 0.23

T: {0,0} + c EI Full ms [50.00-1000.00]

m/z= 50.00-1000.04

| m/z    | Intensity | Relative |
|--------|-----------|----------|
| 991.15 | 0.2       | 0.00     |
| 992.21 | 0.1       | 0.00     |
| 992.85 | 2.2       | 0.01     |
| 994.08 | 1.3       | 0.00     |
| 995.35 | 0.0       | 0.00     |
| 997.03 | 0.0       | 0.00     |
| 997.79 | 0.1       | 0.00     |
| 999.78 | 0.0       | 0.00     |
