# Supplementary material for: A Simple and Efficient Multicomponent Synthesis of Novel Pyrazole, N-aminopyridine and Pyrazolo[3,4-b]Pyridine Derivatives in Water
Source: Preprints.org preprint supplement (doi:10.20944/preprints202312.1232.v1), 2023-12-28
Supplement: Supplementary file 100 [file supplementary]

RT: 0.00 - 4.17

NL:  
3.18E6  
TIC MS  
Selwan-44

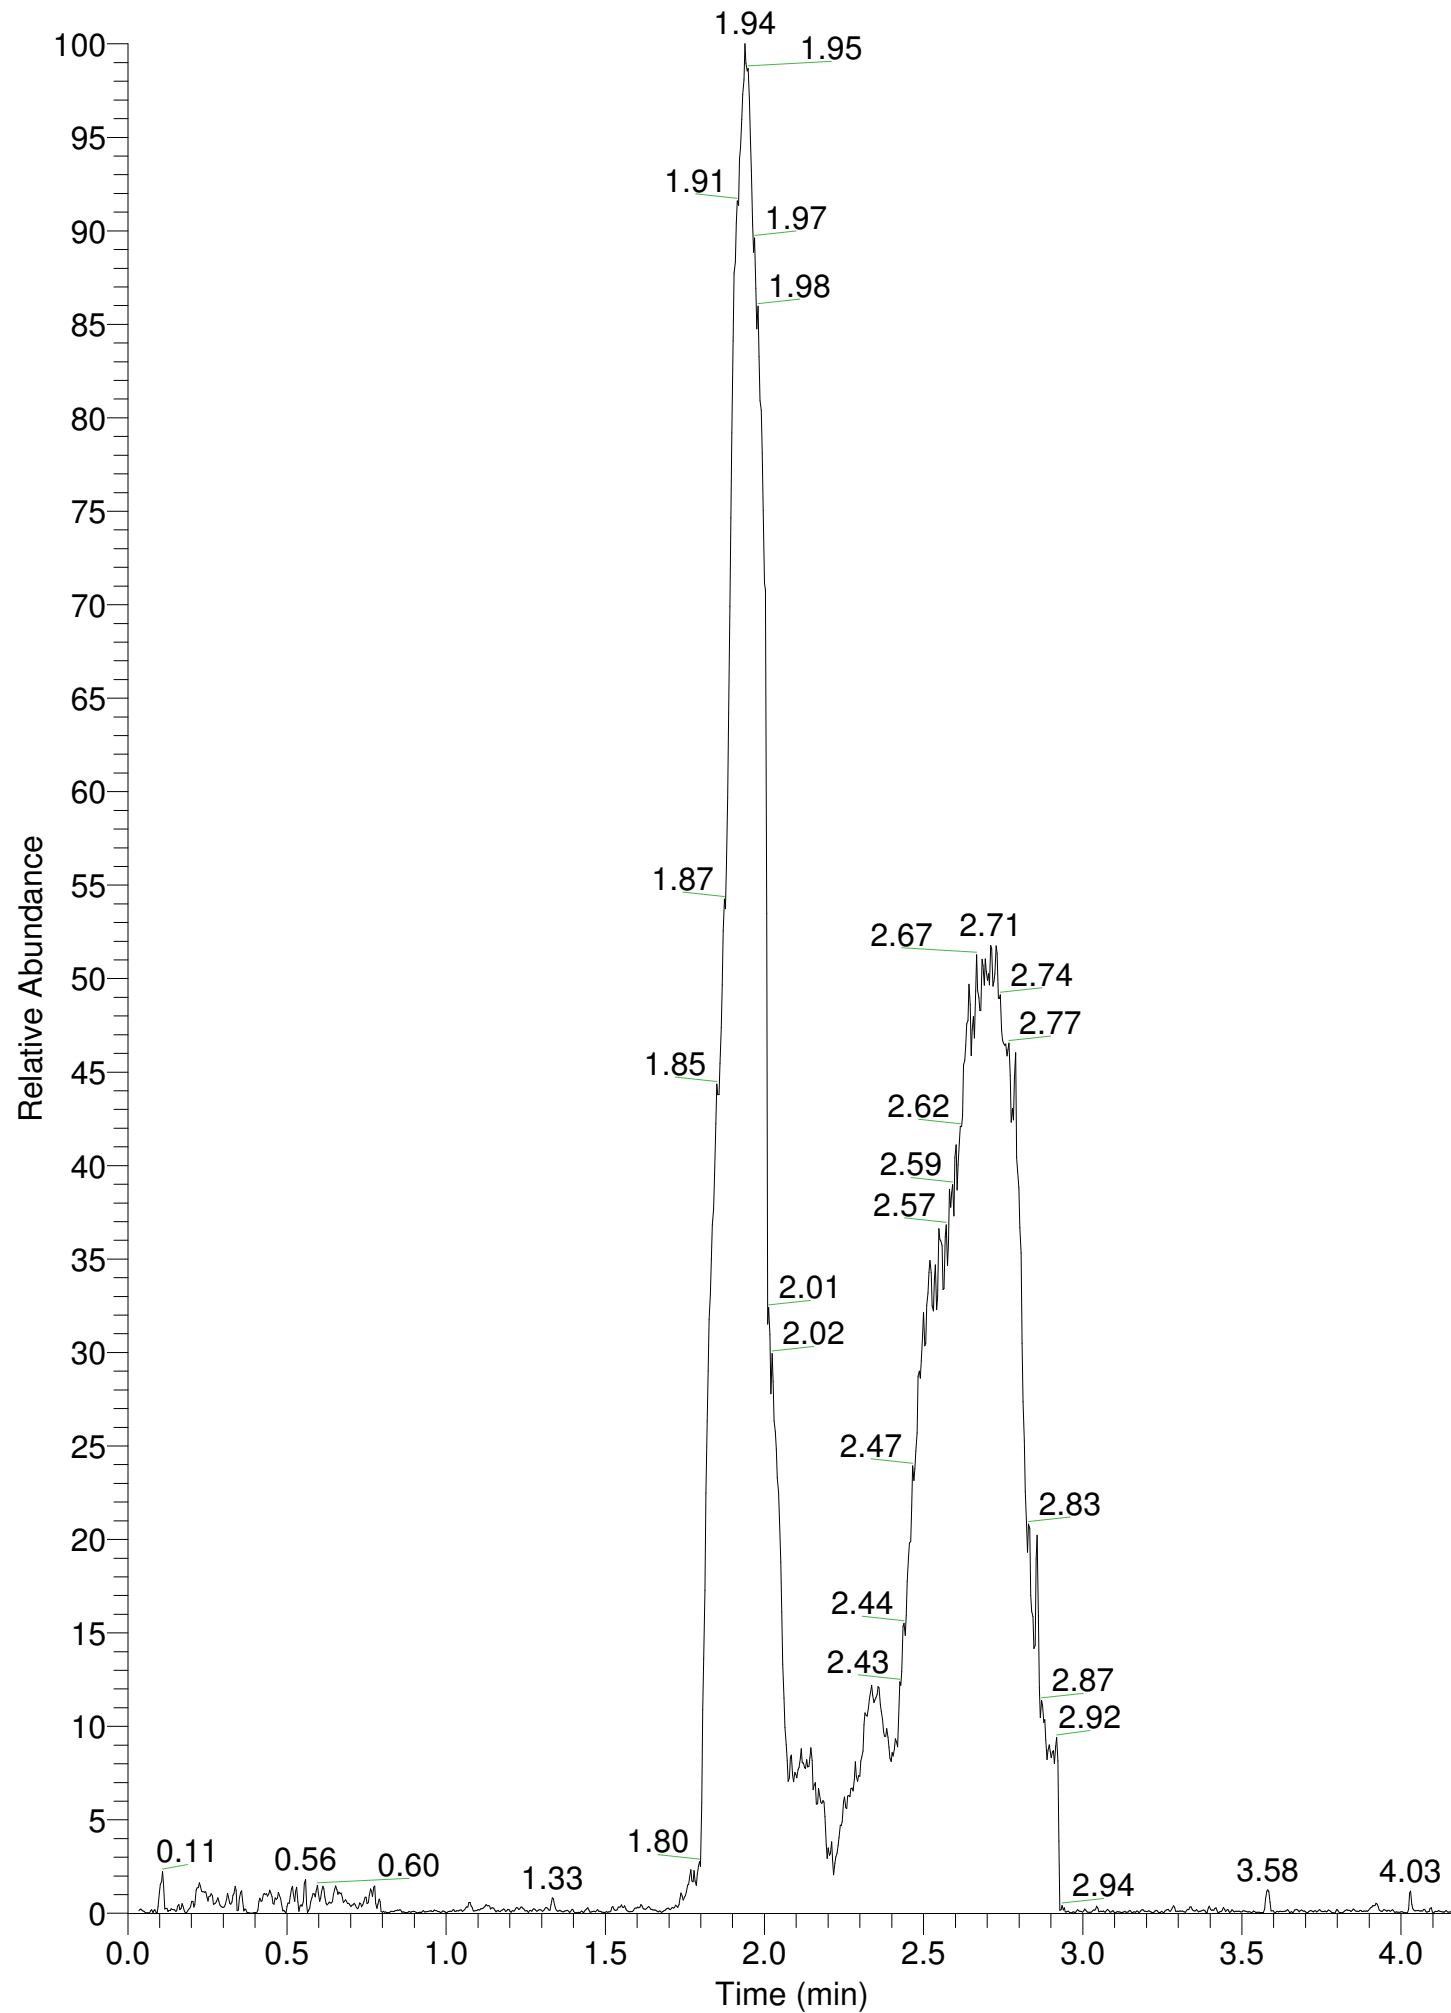

Selwan-44 #744 RT: 2.56 AV: 1 NL: 1.83E5

T: {0,0} + c EI Full ms [50.00-1000.00]

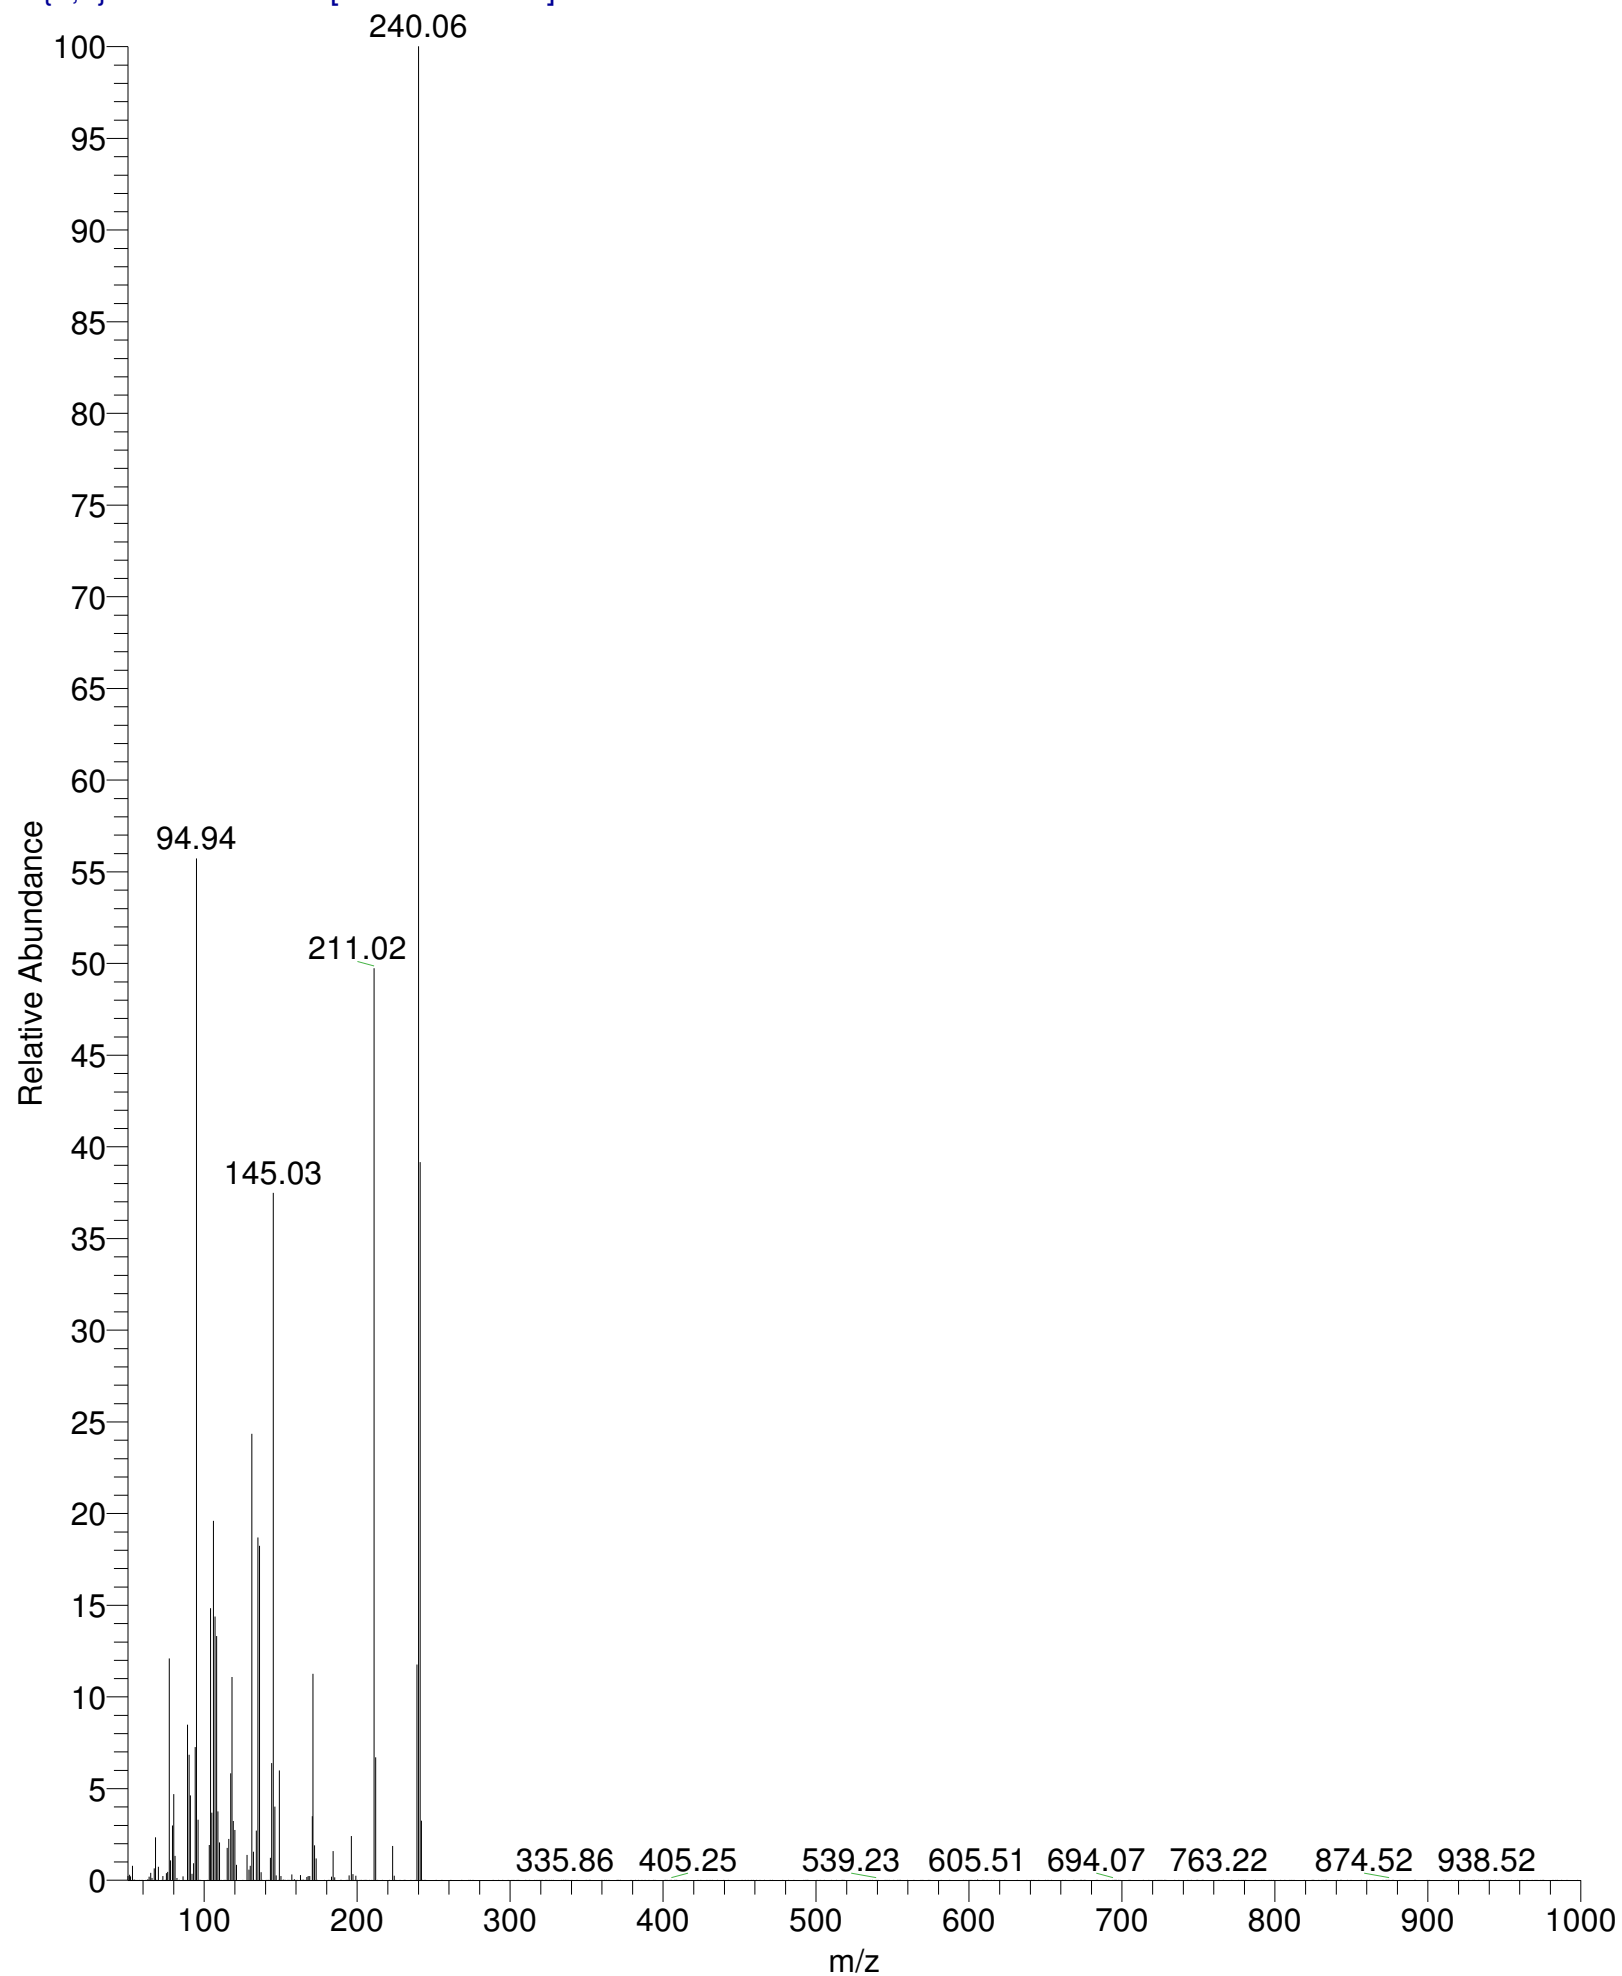

Selwan-44#744 RT: 2.56

T: {0,0} + c EI Full ms [50.00-1000.00]

m/z= 50.00-1000.04

| m/z    | Intensity | Relative |
|--------|-----------|----------|
| 50.04  | 401.5     | 0.22     |
| 51.05  | 527.5     | 0.29     |
| 51.80  | 381.2     | 0.21     |
| 52.94  | 1423.4    | 0.78     |
| 54.08  | 50.8      | 0.03     |
| 54.59  | 0.0       | 0.00     |
| 55.38  | 0.0       | 0.00     |
| 56.58  | 0.0       | 0.00     |
| 57.64  | 0.0       | 0.00     |
| 58.70  | 0.0       | 0.00     |
| 59.69  | 0.0       | 0.00     |
| 61.90  | 18.9      | 0.01     |
| 63.18  | 64.6      | 0.04     |
| 63.89  | 324.5     | 0.18     |
| 65.01  | 721.7     | 0.39     |
| 65.89  | 222.2     | 0.12     |
| 67.19  | 1154.1    | 0.63     |
| 68.06  | 4262.4    | 2.33     |
| 68.62  | 0.8       | 0.00     |
| 69.20  | 0.1       | 0.00     |
| 70.06  | 1316.5    | 0.72     |
| 72.26  | 0.0       | 0.00     |
| 72.88  | 411.8     | 0.22     |
| 74.11  | 0.0       | 0.00     |
| 74.66  | 0.0       | 0.00     |
| 75.26  | 689.9     | 0.38     |
| 76.14  | 830.3     | 0.45     |
| 77.04  | 22163.2   | 12.09    |
| 77.93  | 1954.4    | 1.07     |
| 79.10  | 5466.4    | 2.98     |
| 80.02  | 8571.8    | 4.68     |
| 80.95  | 2413.8    | 1.32     |
| 82.20  | 209.7     | 0.11     |
| 83.34  | 0.2       | 0.00     |
| 83.89  | 0.2       | 0.00     |
| 86.11  | 359.7     | 0.20     |
| 86.76  | 0.1       | 0.00     |
| 87.99  | 0.1       | 0.00     |
| 89.01  | 15525.3   | 8.47     |
| 89.99  | 12512.1   | 6.83     |
| 91.00  | 8466.9    | 4.62     |
| 91.87  | 637.0     | 0.35     |
| 93.03  | 1667.6    | 0.91     |
| 94.02  | 13300.9   | 7.26     |
| 94.94  | 102097.6  | 55.71    |
| 96.01  | 6043.3    | 3.30     |
| 96.83  | 0.0       | 0.00     |
| 97.53  | 0.2       | 0.00     |
| 102.07 | 16.8      | 0.01     |
| 103.17 | 3513.6    | 1.92     |
| 104.00 | 27171.5   | 14.83    |
| 104.97 | 6744.3    | 3.68     |
| 105.98 | 35907.6   | 19.59    |
| 107.03 | 26349.4   | 14.38    |
| 107.99 | 24379.1   | 13.30    |

Selwan-44#744 RT: 2.56

T: {0,0} + c EI Full ms [50.00-1000.00]

m/z= 50.00-1000.04

| m/z    | Intensity | Relative |
|--------|-----------|----------|
| 108.99 | 6868.8    | 3.75     |
| 110.04 | 3750.8    | 2.05     |
| 111.04 | 0.1       | 0.00     |
| 112.83 | 0.0       | 0.00     |
| 113.64 | 0.0       | 0.00     |
| 115.06 | 3214.6    | 1.75     |
| 116.04 | 4112.4    | 2.24     |
| 117.16 | 10661.7   | 5.82     |
| 118.05 | 20301.2   | 11.08    |
| 118.95 | 5896.8    | 3.22     |
| 119.97 | 5009.7    | 2.73     |
| 121.01 | 1531.1    | 0.84     |
| 125.25 | 0.0       | 0.00     |
| 127.98 | 2497.9    | 1.36     |
| 129.15 | 1040.5    | 0.57     |
| 130.05 | 1409.9    | 0.77     |
| 131.01 | 44591.6   | 24.33    |
| 132.03 | 2815.5    | 1.54     |
| 132.93 | 0.0       | 0.00     |
| 134.10 | 4950.7    | 2.70     |
| 135.01 | 34224.5   | 18.67    |
| 135.99 | 33405.1   | 18.23    |
| 137.03 | 781.4     | 0.43     |
| 138.06 | 0.3       | 0.00     |
| 140.44 | 0.0       | 0.00     |
| 141.44 | 0.0       | 0.00     |
| 142.23 | 21.0      | 0.01     |
| 143.25 | 2229.9    | 1.22     |
| 144.13 | 11677.4   | 6.37     |
| 145.03 | 68674.3   | 37.47    |
| 146.05 | 7329.0    | 4.00     |
| 146.89 | 464.7     | 0.25     |
| 148.35 | 2.2       | 0.00     |
| 149.04 | 10942.0   | 5.97     |
| 150.13 | 384.8     | 0.21     |
| 151.62 | 38.1      | 0.02     |
| 152.48 | 0.0       | 0.00     |
| 152.99 | 0.1       | 0.00     |
| 154.29 | 0.0       | 0.00     |
| 155.21 | 12.0      | 0.01     |
| 155.96 | 1.9       | 0.00     |
| 157.20 | 559.6     | 0.31     |
| 158.06 | 0.0       | 0.00     |
| 158.90 | 83.9      | 0.05     |
| 159.95 | 0.0       | 0.00     |
| 161.07 | 30.9      | 0.02     |
| 162.86 | 500.6     | 0.27     |
| 163.41 | 0.9       | 0.00     |
| 164.45 | 43.2      | 0.02     |
| 165.14 | 1.5       | 0.00     |
| 166.07 | 17.1      | 0.01     |
| 167.08 | 318.4     | 0.17     |
| 167.87 | 410.5     | 0.22     |
| 168.86 | 403.1     | 0.22     |
| 170.58 | 6377.7    | 3.48     |

Selwan-44#744 RT: 2.56

T: {0,0} + c EI Full ms [50.00-1000.00]

m/z= 50.00-1000.04

| m/z    | Intensity | Relative |
|--------|-----------|----------|
| 171.10 | 20627.8   | 11.26    |
| 172.12 | 3462.0    | 1.89     |
| 173.06 | 2167.3    | 1.18     |
| 173.98 | 0.0       | 0.00     |
| 178.47 | 0.0       | 0.00     |
| 181.16 | 0.1       | 0.00     |
| 182.07 | 0.0       | 0.00     |
| 183.07 | 337.3     | 0.18     |
| 184.15 | 2906.8    | 1.59     |
| 185.19 | 262.0     | 0.14     |
| 189.12 | 0.0       | 0.00     |
| 189.73 | 0.0       | 0.00     |
| 192.81 | 0.0       | 0.00     |
| 193.55 | 0.1       | 0.00     |
| 194.74 | 448.1     | 0.24     |
| 196.11 | 4384.8    | 2.39     |
| 197.21 | 604.8     | 0.33     |
| 198.09 | 0.0       | 0.00     |
| 199.15 | 437.9     | 0.24     |
| 200.20 | 0.0       | 0.00     |
| 201.78 | 0.0       | 0.00     |
| 202.90 | 0.0       | 0.00     |
| 204.41 | 0.0       | 0.00     |
| 205.44 | 0.0       | 0.00     |
| 206.26 | 0.0       | 0.00     |
| 208.04 | 0.0       | 0.00     |
| 209.45 | 0.1       | 0.00     |
| 211.02 | 91145.3   | 49.73    |
| 212.05 | 12256.3   | 6.69     |
| 213.20 | 1.5       | 0.00     |
| 216.35 | 0.0       | 0.00     |
| 221.10 | 0.0       | 0.00     |
| 223.03 | 3415.5    | 1.86     |
| 224.09 | 428.4     | 0.23     |
| 225.12 | 0.0       | 0.00     |
| 228.03 | 0.0       | 0.00     |
| 230.63 | 0.1       | 0.00     |
| 231.29 | 0.0       | 0.00     |
| 234.98 | 0.0       | 0.00     |
| 237.89 | 0.0       | 0.00     |
| 239.06 | 21533.8   | 11.75    |
| 240.06 | 183266.9  | 100.00   |
| 241.09 | 71761.7   | 39.16    |
| 242.05 | 5918.6    | 3.23     |
| 242.63 | 0.3       | 0.00     |
| 243.90 | 0.2       | 0.00     |
| 244.72 | 0.0       | 0.00     |
| 251.67 | 0.0       | 0.00     |
| 255.34 | 0.0       | 0.00     |
| 261.27 | 0.0       | 0.00     |
| 268.25 | 0.0       | 0.00     |
| 272.93 | 0.0       | 0.00     |
| 273.93 | 0.0       | 0.00     |
| 275.67 | 0.0       | 0.00     |
| 288.92 | 0.0       | 0.00     |

Selwan-44#744 RT: 2.56

T: {0,0} + c EI Full ms [50.00-1000.00]

m/z= 50.00-1000.04

| m/z    | Intensity | Relative |
|--------|-----------|----------|
| 292.32 | 0.0       | 0.00     |
| 295.08 | 0.0       | 0.00     |
| 298.69 | 0.0       | 0.00     |
| 301.18 | 0.0       | 0.00     |
| 302.33 | 0.0       | 0.00     |
| 304.41 | 0.0       | 0.00     |
| 305.57 | 0.0       | 0.00     |
| 310.17 | 0.0       | 0.00     |
| 312.77 | 0.0       | 0.00     |
| 315.93 | 0.0       | 0.00     |
| 317.42 | 0.0       | 0.00     |
| 318.92 | 0.0       | 0.00     |
| 320.28 | 0.0       | 0.00     |
| 321.01 | 0.0       | 0.00     |
| 323.08 | 0.0       | 0.00     |
| 324.03 | 0.0       | 0.00     |
| 325.56 | 0.0       | 0.00     |
| 326.90 | 0.0       | 0.00     |
| 328.23 | 0.0       | 0.00     |
| 333.52 | 0.0       | 0.00     |
| 334.86 | 0.0       | 0.00     |
| 335.86 | 0.1       | 0.00     |
| 336.48 | 0.0       | 0.00     |
| 337.75 | 0.0       | 0.00     |
| 340.29 | 0.0       | 0.00     |
| 343.55 | 0.0       | 0.00     |
| 349.61 | 0.0       | 0.00     |
| 351.79 | 0.0       | 0.00     |
| 352.39 | 0.0       | 0.00     |
| 360.01 | 0.0       | 0.00     |
| 361.68 | 0.0       | 0.00     |
| 362.97 | 0.0       | 0.00     |
| 364.56 | 0.0       | 0.00     |
| 369.76 | 0.0       | 0.00     |
| 370.31 | 0.0       | 0.00     |
| 371.02 | 0.0       | 0.00     |
| 372.13 | 0.0       | 0.00     |
| 378.95 | 0.0       | 0.00     |
| 381.87 | 0.0       | 0.00     |
| 383.70 | 0.0       | 0.00     |
| 386.01 | 0.0       | 0.00     |
| 388.09 | 0.0       | 0.00     |
| 390.69 | 0.0       | 0.00     |
| 393.64 | 0.0       | 0.00     |
| 394.60 | 0.0       | 0.00     |
| 401.14 | 0.0       | 0.00     |
| 401.73 | 0.0       | 0.00     |
| 402.69 | 0.0       | 0.00     |
| 404.49 | 0.0       | 0.00     |
| 405.25 | 0.0       | 0.00     |
| 407.43 | 0.0       | 0.00     |
| 408.18 | 0.0       | 0.00     |
| 408.91 | 0.0       | 0.00     |
| 413.11 | 0.0       | 0.00     |
| 414.12 | 0.0       | 0.00     |

Selwan-44#744 RT: 2.56

T: {0,0} + c EI Full ms [50.00-1000.00]

m/z= 50.00-1000.04

| m/z    | Intensity | Relative |
|--------|-----------|----------|
| 415.06 | 0.0       | 0.00     |
| 422.72 | 0.0       | 0.00     |
| 424.61 | 0.0       | 0.00     |
| 428.63 | 0.0       | 0.00     |
| 430.57 | 0.0       | 0.00     |
| 432.03 | 0.0       | 0.00     |
| 435.52 | 0.0       | 0.00     |
| 439.67 | 0.0       | 0.00     |
| 442.69 | 0.0       | 0.00     |
| 451.64 | 0.0       | 0.00     |
| 453.60 | 0.0       | 0.00     |
| 455.56 | 0.0       | 0.00     |
| 457.71 | 0.0       | 0.00     |
| 458.99 | 0.0       | 0.00     |
| 460.90 | 0.0       | 0.00     |
| 463.27 | 0.0       | 0.00     |
| 466.15 | 0.0       | 0.00     |
| 470.04 | 0.0       | 0.00     |
| 471.50 | 0.0       | 0.00     |
| 478.10 | 0.0       | 0.00     |
| 481.82 | 0.0       | 0.00     |
| 485.41 | 0.0       | 0.00     |
| 491.93 | 0.0       | 0.00     |
| 493.25 | 0.0       | 0.00     |
| 494.10 | 0.0       | 0.00     |
| 494.64 | 0.0       | 0.00     |
| 500.59 | 0.0       | 0.00     |
| 502.73 | 0.0       | 0.00     |
| 505.30 | 0.0       | 0.00     |
| 510.03 | 0.0       | 0.00     |
| 513.31 | 0.0       | 0.00     |
| 516.79 | 0.0       | 0.00     |
| 517.56 | 0.0       | 0.00     |
| 518.40 | 0.0       | 0.00     |
| 528.36 | 0.0       | 0.00     |
| 535.19 | 0.0       | 0.00     |
| 536.75 | 0.0       | 0.00     |
| 539.23 | 0.0       | 0.00     |
| 540.51 | 0.0       | 0.00     |
| 545.14 | 0.0       | 0.00     |
| 546.29 | 0.0       | 0.00     |
| 547.74 | 0.0       | 0.00     |
| 550.84 | 0.0       | 0.00     |
| 553.24 | 0.0       | 0.00     |
| 554.33 | 0.0       | 0.00     |
| 555.22 | 0.0       | 0.00     |
| 559.71 | 0.0       | 0.00     |
| 564.00 | 0.0       | 0.00     |
| 568.62 | 0.0       | 0.00     |
| 569.87 | 0.0       | 0.00     |
| 573.31 | 0.0       | 0.00     |
| 574.44 | 0.0       | 0.00     |
| 581.79 | 0.0       | 0.00     |
| 587.44 | 0.0       | 0.00     |
| 596.36 | 0.0       | 0.00     |

Selwan-44#744 RT: 2.56

T: {0,0} + c EI Full ms [50.00-1000.00]

m/z= 50.00-1000.04

| m/z    | Intensity | Relative |
|--------|-----------|----------|
| 597.98 | 0.0       | 0.00     |
| 599.85 | 0.0       | 0.00     |
| 600.65 | 0.2       | 0.00     |
| 601.71 | 0.0       | 0.00     |
| 603.81 | 0.0       | 0.00     |
| 605.51 | 43.5      | 0.02     |
| 608.87 | 0.0       | 0.00     |
| 609.69 | 0.0       | 0.00     |
| 611.79 | 0.0       | 0.00     |
| 614.60 | 0.0       | 0.00     |
| 616.49 | 0.0       | 0.00     |
| 619.94 | 0.0       | 0.00     |
| 623.25 | 0.0       | 0.00     |
| 631.43 | 0.0       | 0.00     |
| 637.84 | 0.0       | 0.00     |
| 640.87 | 0.0       | 0.00     |
| 642.44 | 0.0       | 0.00     |
| 645.59 | 0.0       | 0.00     |
| 649.88 | 0.0       | 0.00     |
| 651.68 | 0.0       | 0.00     |
| 653.91 | 0.0       | 0.00     |
| 661.30 | 0.0       | 0.00     |
| 662.91 | 0.0       | 0.00     |
| 668.52 | 0.0       | 0.00     |
| 673.02 | 0.0       | 0.00     |
| 673.54 | 0.0       | 0.00     |
| 675.23 | 0.0       | 0.00     |
| 675.87 | 0.0       | 0.00     |
| 683.20 | 0.0       | 0.00     |
| 684.01 | 0.0       | 0.00     |
| 689.74 | 0.0       | 0.00     |
| 691.24 | 0.0       | 0.00     |
| 694.07 | 0.1       | 0.00     |
| 695.09 | 0.0       | 0.00     |
| 695.77 | 0.0       | 0.00     |
| 696.29 | 0.0       | 0.00     |
| 697.56 | 0.0       | 0.00     |
| 698.68 | 0.0       | 0.00     |
| 704.44 | 0.0       | 0.00     |
| 705.43 | 0.0       | 0.00     |
| 713.90 | 0.0       | 0.00     |
| 717.42 | 0.0       | 0.00     |
| 721.62 | 0.0       | 0.00     |
| 723.59 | 0.0       | 0.00     |
| 724.77 | 0.0       | 0.00     |
| 726.03 | 0.0       | 0.00     |
| 727.77 | 0.0       | 0.00     |
| 728.59 | 0.0       | 0.00     |
| 734.41 | 0.0       | 0.00     |
| 737.17 | 0.0       | 0.00     |
| 743.06 | 0.0       | 0.00     |
| 745.30 | 0.0       | 0.00     |
| 748.93 | 0.0       | 0.00     |
| 749.58 | 0.0       | 0.00     |
| 752.40 | 0.0       | 0.00     |



Selwan-44#744 RT: 2.56

T: {0,0} + c EI Full ms [50.00-1000.00]

m/z= 50.00-1000.04

| m/z    | Intensity | Relative |
|--------|-----------|----------|
| 753.13 | 0.0       | 0.00     |
| 763.22 | 0.1       | 0.00     |
| 766.16 | 0.0       | 0.00     |
| 771.59 | 0.0       | 0.00     |
| 776.35 | 0.0       | 0.00     |
| 778.31 | 0.0       | 0.00     |
| 779.69 | 0.0       | 0.00     |
| 780.92 | 0.0       | 0.00     |
| 787.20 | 0.0       | 0.00     |
| 791.33 | 0.0       | 0.00     |
| 792.89 | 0.0       | 0.00     |
| 796.21 | 0.0       | 0.00     |
| 797.67 | 0.0       | 0.00     |
| 799.15 | 0.0       | 0.00     |
| 803.61 | 0.1       | 0.00     |
| 806.34 | 0.0       | 0.00     |
| 809.82 | 0.0       | 0.00     |
| 810.98 | 0.0       | 0.00     |
| 812.54 | 0.0       | 0.00     |
| 819.26 | 0.0       | 0.00     |
| 824.23 | 0.0       | 0.00     |
| 824.83 | 0.0       | 0.00     |
| 825.36 | 0.0       | 0.00     |
| 828.59 | 0.0       | 0.00     |
| 830.66 | 0.0       | 0.00     |
| 831.96 | 0.0       | 0.00     |
| 833.09 | 0.0       | 0.00     |
| 833.63 | 0.0       | 0.00     |
| 840.76 | 0.0       | 0.00     |
| 842.90 | 0.0       | 0.00     |
| 843.46 | 0.0       | 0.00     |
| 847.50 | 0.0       | 0.00     |
| 849.63 | 0.0       | 0.00     |
| 856.35 | 0.0       | 0.00     |
| 860.26 | 0.0       | 0.00     |
| 861.96 | 0.0       | 0.00     |
| 865.17 | 0.0       | 0.00     |
| 870.64 | 0.0       | 0.00     |
| 872.52 | 0.0       | 0.00     |
| 873.06 | 0.0       | 0.00     |
| 873.91 | 0.0       | 0.00     |
| 874.52 | 0.0       | 0.00     |
| 876.67 | 0.0       | 0.00     |
| 877.49 | 0.0       | 0.00     |
| 881.72 | 0.0       | 0.00     |
| 891.27 | 0.0       | 0.00     |
| 891.84 | 0.0       | 0.00     |
| 899.53 | 0.0       | 0.00     |
| 900.80 | 0.0       | 0.00     |
| 910.35 | 0.0       | 0.00     |
| 915.49 | 0.0       | 0.00     |
| 917.88 | 0.0       | 0.00     |
| 920.51 | 0.0       | 0.00     |
| 921.59 | 0.0       | 0.00     |
| 923.54 | 0.0       | 0.00     |

Selwan-44#744 RT: 2.56

T: {0,0} + c EI Full ms [50.00-1000.00]

m/z= 50.00-1000.04

| m/z    | Intensity | Relative |
|--------|-----------|----------|
| 926.63 | 0.0       | 0.00     |
| 929.46 | 0.0       | 0.00     |
| 930.42 | 0.0       | 0.00     |
| 933.25 | 0.0       | 0.00     |
| 936.59 | 0.0       | 0.00     |
| 938.52 | 0.1       | 0.00     |
| 939.39 | 0.0       | 0.00     |
| 941.02 | 0.0       | 0.00     |
| 944.01 | 0.0       | 0.00     |
| 946.49 | 0.0       | 0.00     |
| 954.47 | 0.0       | 0.00     |
| 958.71 | 0.0       | 0.00     |
| 961.35 | 0.1       | 0.00     |
| 964.87 | 0.0       | 0.00     |
| 968.08 | 0.0       | 0.00     |
| 969.92 | 0.0       | 0.00     |
| 971.35 | 0.0       | 0.00     |
| 973.72 | 0.0       | 0.00     |
| 975.09 | 0.0       | 0.00     |
| 975.66 | 0.0       | 0.00     |
| 981.80 | 0.0       | 0.00     |
| 983.61 | 0.0       | 0.00     |
| 984.74 | 0.0       | 0.00     |
| 987.28 | 0.0       | 0.00     |
| 990.96 | 0.0       | 0.00     |
| 997.92 | 0.0       | 0.00     |
