# Supplementary material for: A Simple and Efficient Multicomponent Synthesis of Novel Pyrazole, N-aminopyridine and Pyrazolo[3,4-b]Pyridine Derivatives in Water
Source: Preprints.org preprint supplement (doi:10.20944/preprints202312.1232.v1), 2023-12-28
Supplement: Supplementary file 103 [file supplementary]

RT: 0.00 - 4.25

NL:  
1.05E6  
TIC MS  
Selwan-39A

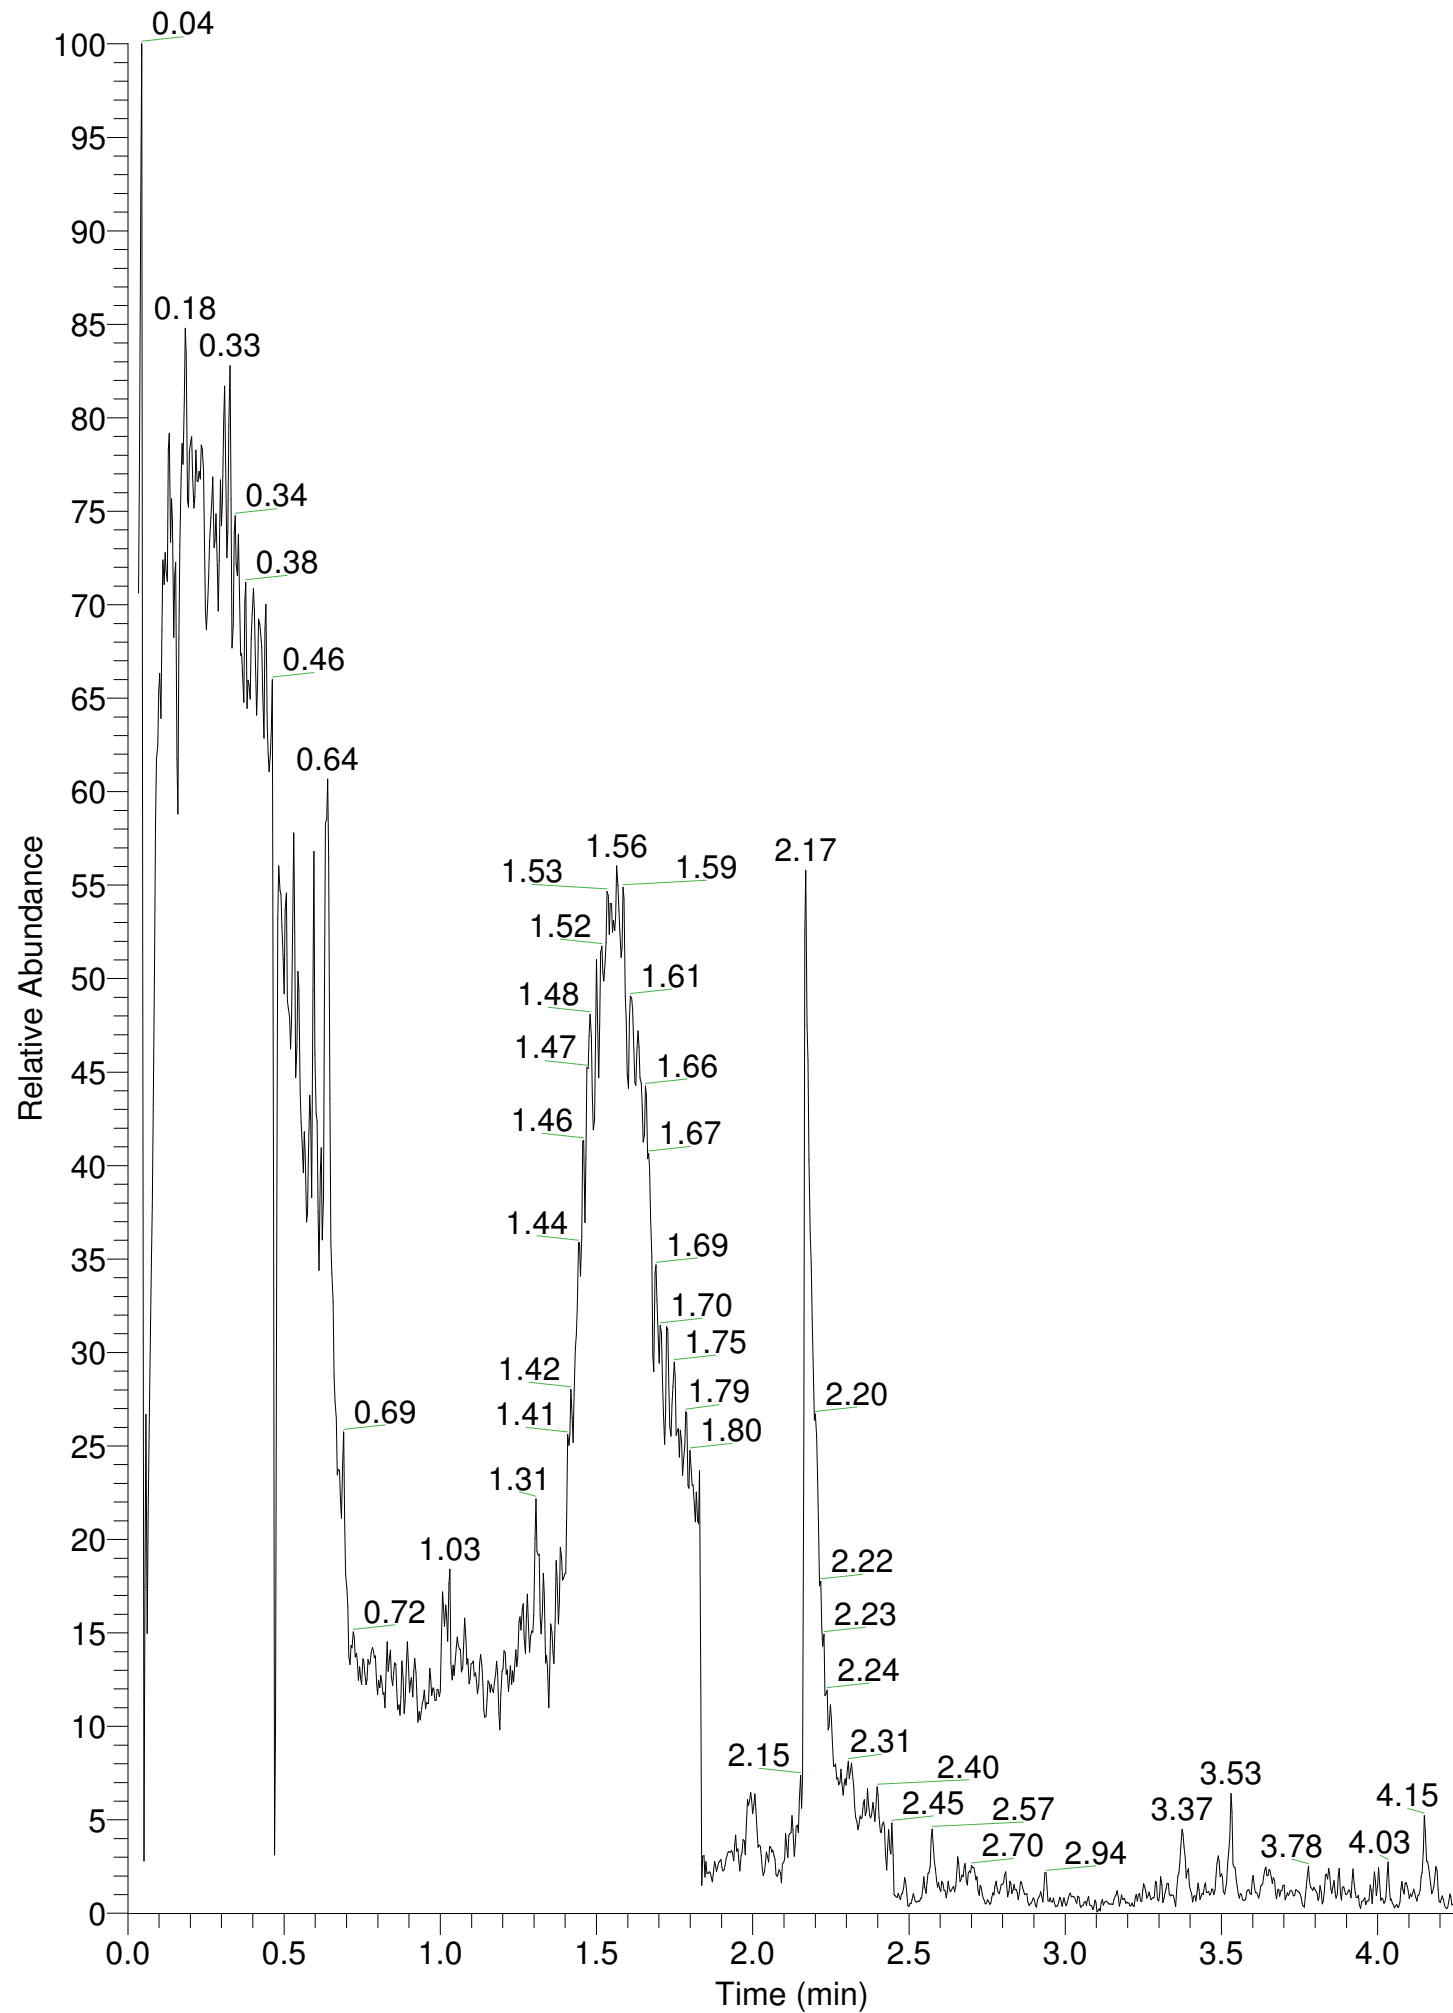

Selwan-39A #170 RT: 0.61 AV: 1 NL: 7.11E4

T: {0,0} + c EI Full ms [50.00-1000.00]

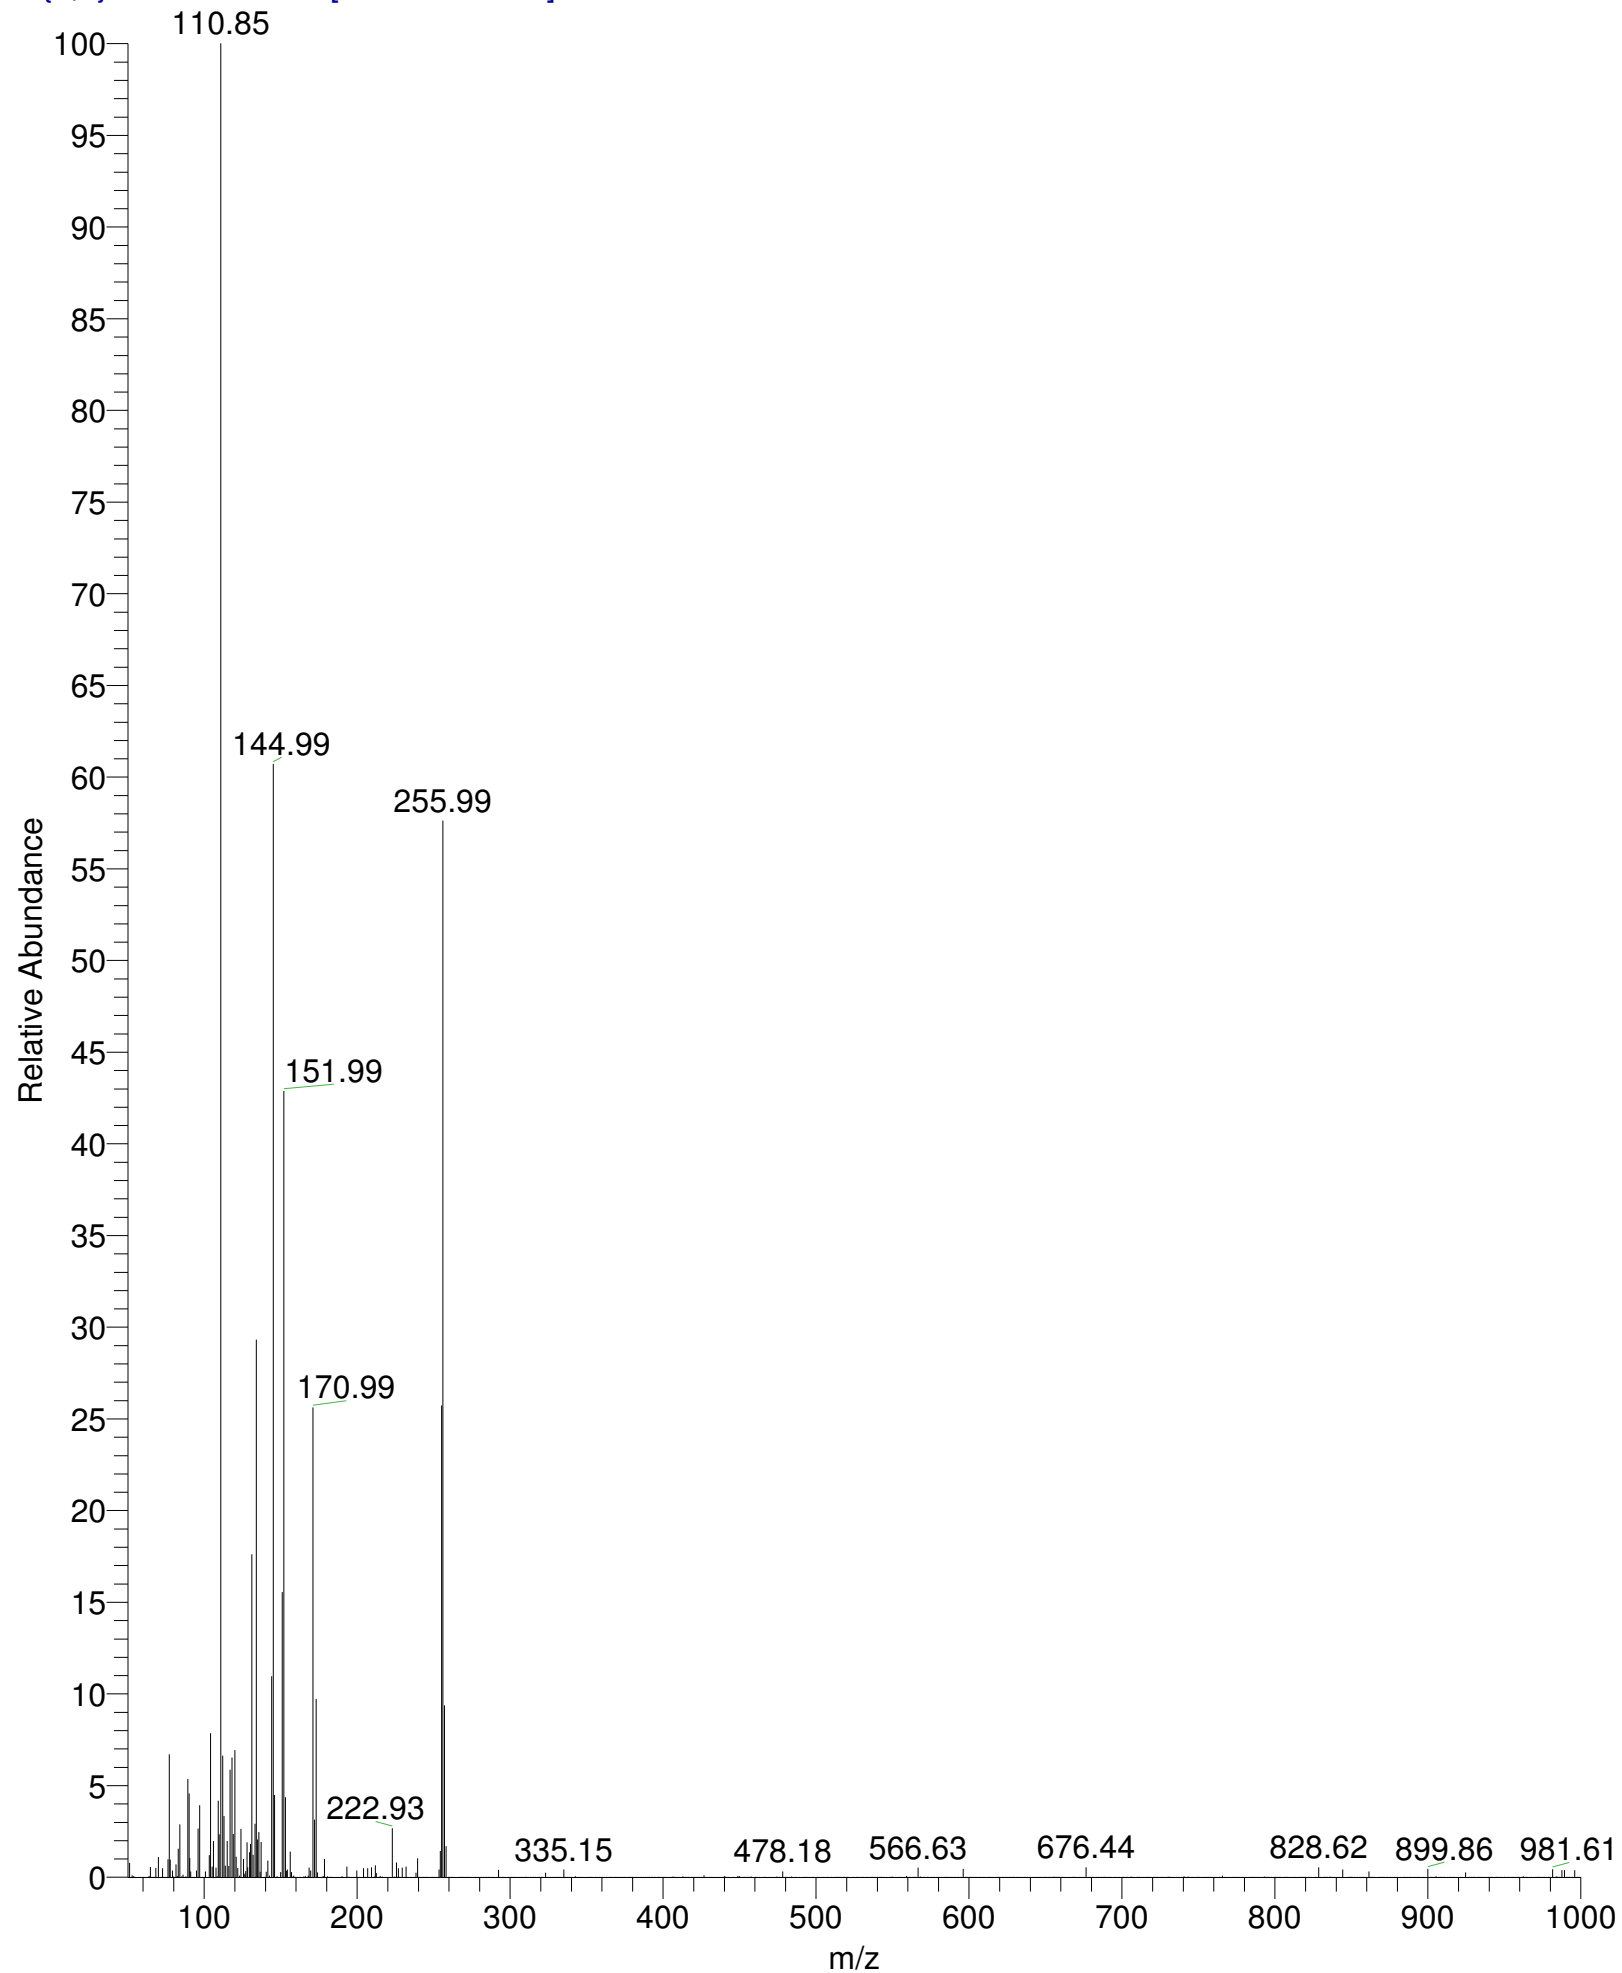

Selwan-39A#170 RT: 0.61

T: {0,0} + c EI Full ms [50.00-1000.00]

m/z= 50.00-1000.04

| m/z    | Intensity | Relative |
|--------|-----------|----------|
| 51.11  | 549.7     | 0.77     |
| 52.10  | 0.0       | 0.00     |
| 52.90  | 66.2      | 0.09     |
| 53.81  | 47.5      | 0.07     |
| 55.07  | 4.1       | 0.01     |
| 57.11  | 0.0       | 0.00     |
| 58.25  | 0.0       | 0.00     |
| 59.23  | 0.1       | 0.00     |
| 60.10  | 1.7       | 0.00     |
| 61.18  | 5.8       | 0.01     |
| 62.37  | 0.0       | 0.00     |
| 63.39  | 0.1       | 0.00     |
| 64.01  | 46.2      | 0.06     |
| 64.75  | 394.3     | 0.55     |
| 65.65  | 1.7       | 0.00     |
| 66.67  | 1.8       | 0.00     |
| 67.27  | 0.0       | 0.00     |
| 68.22  | 354.2     | 0.50     |
| 68.80  | 5.8       | 0.01     |
| 69.90  | 771.4     | 1.08     |
| 70.95  | 0.0       | 0.00     |
| 72.02  | 0.2       | 0.00     |
| 72.70  | 346.7     | 0.49     |
| 73.56  | 0.1       | 0.00     |
| 74.35  | 0.3       | 0.00     |
| 75.37  | 9.8       | 0.01     |
| 76.34  | 688.4     | 0.97     |
| 77.01  | 4755.4    | 6.69     |
| 77.82  | 672.6     | 0.95     |
| 79.24  | 251.1     | 0.35     |
| 80.09  | 16.7      | 0.02     |
| 81.49  | 485.2     | 0.68     |
| 82.23  | 40.4      | 0.06     |
| 83.03  | 1100.0    | 1.55     |
| 84.09  | 2041.7    | 2.87     |
| 85.23  | 35.9      | 0.05     |
| 86.02  | 99.1      | 0.14     |
| 86.88  | 0.0       | 0.00     |
| 87.90  | 36.8      | 0.05     |
| 89.16  | 3805.9    | 5.35     |
| 90.02  | 3247.5    | 4.57     |
| 90.54  | 742.7     | 1.04     |
| 91.14  | 215.4     | 0.30     |
| 91.97  | 1.4       | 0.00     |
| 92.49  | 0.3       | 0.00     |
| 93.58  | 11.4      | 0.02     |
| 94.93  | 254.3     | 0.36     |
| 96.01  | 1885.9    | 2.65     |
| 97.00  | 2791.9    | 3.93     |
| 97.80  | 0.2       | 0.00     |
| 98.92  | 0.2       | 0.00     |
| 99.84  | 0.0       | 0.00     |
| 100.65 | 222.7     | 0.31     |
| 101.21 | 2.1       | 0.00     |
| 102.10 | 10.8      | 0.02     |

Selwan-39A#170 RT: 0.61

T: {0,0} + c EI Full ms [50.00-1000.00]

m/z= 50.00-1000.04

| m/z    | Intensity | Relative |
|--------|-----------|----------|
| 103.19 | 844.9     | 1.19     |
| 104.09 | 5575.7    | 7.84     |
| 105.07 | 398.0     | 0.56     |
| 105.94 | 1396.1    | 1.96     |
| 107.59 | 369.9     | 0.52     |
| 108.41 | 37.0      | 0.05     |
| 109.17 | 2955.7    | 4.16     |
| 109.79 | 1652.1    | 2.32     |
| 110.85 | 71128.9   | 100.00   |
| 111.93 | 4710.9    | 6.62     |
| 112.97 | 2363.2    | 3.32     |
| 113.65 | 443.2     | 0.62     |
| 114.24 | 2.4       | 0.00     |
| 115.04 | 1396.2    | 1.96     |
| 116.11 | 433.9     | 0.61     |
| 116.95 | 4160.0    | 5.85     |
| 118.04 | 4630.9    | 6.51     |
| 118.93 | 1670.9    | 2.35     |
| 119.94 | 4922.2    | 6.92     |
| 120.75 | 785.2     | 1.10     |
| 121.89 | 347.7     | 0.49     |
| 122.83 | 53.4      | 0.08     |
| 123.89 | 1865.5    | 2.62     |
| 125.62 | 704.6     | 0.99     |
| 126.52 | 128.4     | 0.18     |
| 127.13 | 229.7     | 0.32     |
| 127.93 | 1348.2    | 1.90     |
| 128.45 | 379.4     | 0.53     |
| 129.51 | 962.9     | 1.35     |
| 130.18 | 1282.7    | 1.80     |
| 131.01 | 12525.0   | 17.61    |
| 131.90 | 868.4     | 1.22     |
| 133.15 | 2066.0    | 2.90     |
| 133.98 | 20848.1   | 29.31    |
| 134.88 | 1460.2    | 2.05     |
| 135.70 | 1746.2    | 2.45     |
| 136.53 | 200.6     | 0.28     |
| 137.09 | 1359.2    | 1.91     |
| 138.93 | 0.4       | 0.00     |
| 139.63 | 0.0       | 0.00     |
| 140.49 | 210.5     | 0.30     |
| 141.54 | 641.2     | 0.90     |
| 142.54 | 51.4      | 0.07     |
| 143.97 | 7787.2    | 10.95    |
| 144.99 | 43173.9   | 60.70    |
| 145.98 | 3184.1    | 4.48     |
| 146.91 | 0.4       | 0.00     |
| 147.58 | 36.0      | 0.05     |
| 148.79 | 0.0       | 0.00     |
| 149.94 | 188.0     | 0.26     |
| 150.92 | 11052.7   | 15.54    |
| 151.99 | 30488.6   | 42.86    |
| 152.99 | 3098.8    | 4.36     |
| 153.65 | 242.7     | 0.34     |
| 154.27 | 291.9     | 0.41     |

Selwan-39A#170 RT: 0.61

T: {0,0} + c EI Full ms [50.00-1000.00]

m/z= 50.00-1000.04

| m/z    | Intensity | Relative |
|--------|-----------|----------|
| 156.11 | 985.0     | 1.38     |
| 157.09 | 186.4     | 0.26     |
| 157.84 | 24.0      | 0.03     |
| 158.42 | 59.5      | 0.08     |
| 159.71 | 0.0       | 0.00     |
| 160.97 | 0.3       | 0.00     |
| 162.19 | 0.0       | 0.00     |
| 162.92 | 0.0       | 0.00     |
| 163.90 | 0.0       | 0.00     |
| 165.07 | 16.2      | 0.02     |
| 165.96 | 49.1      | 0.07     |
| 167.81 | 50.0      | 0.07     |
| 168.49 | 367.0     | 0.52     |
| 169.49 | 257.9     | 0.36     |
| 170.99 | 18220.5   | 25.62    |
| 172.08 | 2233.9    | 3.14     |
| 173.06 | 6905.6    | 9.71     |
| 173.90 | 173.9     | 0.24     |
| 174.72 | 0.0       | 0.00     |
| 175.47 | 0.0       | 0.00     |
| 176.43 | 0.0       | 0.00     |
| 177.09 | 0.0       | 0.00     |
| 177.83 | 39.2      | 0.06     |
| 178.59 | 702.8     | 0.99     |
| 179.36 | 0.4       | 0.00     |
| 180.49 | 28.6      | 0.04     |
| 181.43 | 0.0       | 0.00     |
| 182.03 | 0.0       | 0.00     |
| 182.55 | 0.0       | 0.00     |
| 183.22 | 1.4       | 0.00     |
| 183.85 | 0.0       | 0.00     |
| 185.19 | 0.2       | 0.00     |
| 186.27 | 0.1       | 0.00     |
| 187.31 | 0.0       | 0.00     |
| 188.09 | 0.0       | 0.00     |
| 189.24 | 0.0       | 0.00     |
| 190.16 | 30.2      | 0.04     |
| 191.09 | 0.0       | 0.00     |
| 192.34 | 0.4       | 0.00     |
| 193.26 | 400.4     | 0.56     |
| 193.84 | 0.0       | 0.00     |
| 194.39 | 0.0       | 0.00     |
| 194.97 | 1.8       | 0.00     |
| 195.86 | 11.2      | 0.02     |
| 196.89 | 0.0       | 0.00     |
| 197.93 | 0.0       | 0.00     |
| 199.02 | 0.0       | 0.00     |
| 199.67 | 257.3     | 0.36     |
| 200.32 | 0.2       | 0.00     |
| 201.19 | 0.2       | 0.00     |
| 202.10 | 2.7       | 0.00     |
| 204.06 | 345.5     | 0.49     |
| 204.91 | 0.0       | 0.00     |
| 205.79 | 0.0       | 0.00     |
| 206.88 | 344.5     | 0.48     |

Selwan-39A#170 RT: 0.61

T: {0,0} + c EI Full ms [50.00-1000.00]

m/z= 50.00-1000.04

| m/z    | Intensity | Relative |
|--------|-----------|----------|
| 207.76 | 0.0       | 0.00     |
| 209.38 | 373.3     | 0.52     |
| 210.34 | 0.0       | 0.00     |
| 211.14 | 21.3      | 0.03     |
| 211.74 | 458.6     | 0.64     |
| 212.50 | 151.7     | 0.21     |
| 213.04 | 0.0       | 0.00     |
| 213.88 | 0.0       | 0.00     |
| 214.87 | 43.1      | 0.06     |
| 215.86 | 0.0       | 0.00     |
| 216.52 | 16.8      | 0.02     |
| 218.03 | 0.0       | 0.00     |
| 218.70 | 2.0       | 0.00     |
| 219.75 | 0.0       | 0.00     |
| 221.36 | 0.2       | 0.00     |
| 222.93 | 1898.7    | 2.67     |
| 224.26 | 24.2      | 0.03     |
| 224.83 | 0.0       | 0.00     |
| 225.72 | 567.2     | 0.80     |
| 226.31 | 0.0       | 0.00     |
| 226.94 | 346.3     | 0.49     |
| 227.66 | 0.0       | 0.00     |
| 228.25 | 0.1       | 0.00     |
| 229.31 | 362.5     | 0.51     |
| 229.87 | 0.0       | 0.00     |
| 230.94 | 0.0       | 0.00     |
| 231.98 | 399.8     | 0.56     |
| 232.80 | 0.0       | 0.00     |
| 233.80 | 0.1       | 0.00     |
| 235.11 | 2.0       | 0.00     |
| 236.41 | 0.0       | 0.00     |
| 237.50 | 1.6       | 0.00     |
| 238.44 | 167.6     | 0.24     |
| 239.35 | 721.9     | 1.01     |
| 240.19 | 1.8       | 0.00     |
| 241.20 | 0.0       | 0.00     |
| 242.29 | 0.0       | 0.00     |
| 242.96 | 0.0       | 0.00     |
| 243.62 | 0.0       | 0.00     |
| 244.42 | 0.0       | 0.00     |
| 245.03 | 0.0       | 0.00     |
| 245.99 | 0.1       | 0.00     |
| 246.64 | 0.0       | 0.00     |
| 248.05 | 0.0       | 0.00     |
| 248.88 | 0.0       | 0.00     |
| 249.46 | 0.0       | 0.00     |
| 250.60 | 0.0       | 0.00     |
| 251.66 | 0.0       | 0.00     |
| 252.21 | 0.0       | 0.00     |
| 253.41 | 289.4     | 0.41     |
| 254.38 | 1015.2    | 1.43     |
| 255.04 | 18297.3   | 25.72    |
| 255.99 | 40981.5   | 57.62    |
| 257.02 | 6660.1    | 9.36     |
| 258.06 | 1198.1    | 1.68     |

Selwan-39A#170 RT: 0.61

T: {0,0} + c EI Full ms [50.00-1000.00]

m/z= 50.00-1000.04

| m/z    | Intensity | Relative |
|--------|-----------|----------|
| 259.31 | 0.1       | 0.00     |
| 259.86 | 1.7       | 0.00     |
| 260.53 | 0.0       | 0.00     |
| 261.52 | 0.0       | 0.00     |
| 262.44 | 0.0       | 0.00     |
| 263.79 | 0.0       | 0.00     |
| 265.50 | 0.0       | 0.00     |
| 266.82 | 0.0       | 0.00     |
| 267.42 | 1.1       | 0.00     |
| 267.92 | 0.0       | 0.00     |
| 268.65 | 0.1       | 0.00     |
| 269.59 | 0.1       | 0.00     |
| 270.19 | 0.0       | 0.00     |
| 271.24 | 2.6       | 0.00     |
| 271.82 | 0.0       | 0.00     |
| 272.65 | 0.0       | 0.00     |
| 273.26 | 0.0       | 0.00     |
| 274.49 | 0.0       | 0.00     |
| 275.84 | 0.0       | 0.00     |
| 276.85 | 0.0       | 0.00     |
| 277.49 | 0.0       | 0.00     |
| 278.24 | 0.0       | 0.00     |
| 279.29 | 0.0       | 0.00     |
| 280.40 | 0.0       | 0.00     |
| 281.26 | 0.0       | 0.00     |
| 282.55 | 1.1       | 0.00     |
| 283.67 | 1.0       | 0.00     |
| 284.38 | 0.1       | 0.00     |
| 285.37 | 0.0       | 0.00     |
| 286.16 | 0.0       | 0.00     |
| 286.83 | 0.0       | 0.00     |
| 288.09 | 0.1       | 0.00     |
| 289.32 | 0.0       | 0.00     |
| 291.25 | 0.0       | 0.00     |
| 292.43 | 277.6     | 0.39     |
| 293.27 | 0.0       | 0.00     |
| 293.81 | 0.0       | 0.00     |
| 294.86 | 0.0       | 0.00     |
| 295.87 | 0.0       | 0.00     |
| 297.20 | 0.0       | 0.00     |
| 298.75 | 0.0       | 0.00     |
| 299.70 | 0.0       | 0.00     |
| 300.28 | 0.0       | 0.00     |
| 301.25 | 0.0       | 0.00     |
| 301.90 | 0.0       | 0.00     |
| 302.66 | 0.0       | 0.00     |
| 303.70 | 0.0       | 0.00     |
| 305.21 | 0.0       | 0.00     |
| 306.24 | 0.0       | 0.00     |
| 307.11 | 0.0       | 0.00     |
| 307.74 | 0.0       | 0.00     |
| 309.19 | 0.0       | 0.00     |
| 309.88 | 0.0       | 0.00     |
| 310.50 | 0.0       | 0.00     |
| 311.00 | 0.5       | 0.00     |

Selwan-39A#170 RT: 0.61

T: {0,0} + c EI Full ms [50.00-1000.00]

m/z= 50.00-1000.04

| m/z    | Intensity | Relative |
|--------|-----------|----------|
| 311.93 | 0.0       | 0.00     |
| 313.33 | 0.0       | 0.00     |
| 314.21 | 0.0       | 0.00     |
| 315.15 | 0.0       | 0.00     |
| 315.69 | 0.0       | 0.00     |
| 316.54 | 0.0       | 0.00     |
| 317.94 | 0.0       | 0.00     |
| 319.17 | 0.0       | 0.00     |
| 320.36 | 0.0       | 0.00     |
| 320.97 | 0.2       | 0.00     |
| 321.50 | 0.0       | 0.00     |
| 323.23 | 170.5     | 0.24     |
| 324.20 | 1.8       | 0.00     |
| 324.97 | 0.0       | 0.00     |
| 326.36 | 0.0       | 0.00     |
| 327.49 | 0.0       | 0.00     |
| 328.72 | 0.0       | 0.00     |
| 329.59 | 0.0       | 0.00     |
| 330.38 | 0.1       | 0.00     |
| 331.54 | 0.0       | 0.00     |
| 332.06 | 0.0       | 0.00     |
| 333.03 | 0.0       | 0.00     |
| 334.40 | 0.0       | 0.00     |
| 335.15 | 286.1     | 0.40     |
| 335.93 | 0.0       | 0.00     |
| 336.61 | 0.0       | 0.00     |
| 337.55 | 0.0       | 0.00     |
| 338.60 | 0.0       | 0.00     |
| 339.14 | 0.0       | 0.00     |
| 340.28 | 0.0       | 0.00     |
| 342.02 | 0.0       | 0.00     |
| 342.68 | 29.8      | 0.04     |
| 343.64 | 0.0       | 0.00     |
| 344.41 | 0.0       | 0.00     |
| 345.33 | 0.6       | 0.00     |
| 346.30 | 0.0       | 0.00     |
| 347.39 | 0.0       | 0.00     |
| 349.19 | 0.0       | 0.00     |
| 350.38 | 11.2      | 0.02     |
| 351.40 | 0.1       | 0.00     |
| 352.33 | 0.0       | 0.00     |
| 352.93 | 0.0       | 0.00     |
| 353.68 | 0.3       | 0.00     |
| 355.72 | 0.0       | 0.00     |
| 356.99 | 0.1       | 0.00     |
| 358.49 | 0.2       | 0.00     |
| 359.43 | 0.0       | 0.00     |
| 360.41 | 0.0       | 0.00     |
| 361.61 | 0.1       | 0.00     |
| 362.82 | 0.0       | 0.00     |
| 363.84 | 0.0       | 0.00     |
| 365.34 | 0.0       | 0.00     |
| 365.89 | 0.1       | 0.00     |
| 366.64 | 0.0       | 0.00     |
| 368.23 | 0.1       | 0.00     |



Selwan-39A#170 RT: 0.61

T: {0,0} + c EI Full ms [50.00-1000.00]

m/z= 50.00-1000.04

| m/z    | Intensity | Relative |
|--------|-----------|----------|
| 368.82 | 0.0       | 0.00     |
| 369.89 | 0.0       | 0.00     |
| 370.77 | 0.1       | 0.00     |
| 371.97 | 2.0       | 0.00     |
| 372.81 | 0.0       | 0.00     |
| 373.68 | 0.3       | 0.00     |
| 374.58 | 0.0       | 0.00     |
| 375.22 | 0.0       | 0.00     |
| 377.06 | 0.1       | 0.00     |
| 377.62 | 0.0       | 0.00     |
| 378.34 | 0.0       | 0.00     |
| 379.02 | 0.0       | 0.00     |
| 379.85 | 1.1       | 0.00     |
| 380.51 | 0.0       | 0.00     |
| 382.17 | 0.1       | 0.00     |
| 382.82 | 0.2       | 0.00     |
| 384.11 | 0.3       | 0.00     |
| 385.06 | 0.0       | 0.00     |
| 386.09 | 0.0       | 0.00     |
| 387.10 | 0.4       | 0.00     |
| 388.60 | 0.0       | 0.00     |
| 389.91 | 0.1       | 0.00     |
| 390.57 | 0.0       | 0.00     |
| 391.22 | 0.0       | 0.00     |
| 392.35 | 0.0       | 0.00     |
| 392.99 | 0.3       | 0.00     |
| 394.17 | 0.0       | 0.00     |
| 394.95 | 0.0       | 0.00     |
| 396.05 | 0.0       | 0.00     |
| 397.07 | 0.2       | 0.00     |
| 397.70 | 0.0       | 0.00     |
| 398.55 | 0.0       | 0.00     |
| 399.80 | 0.1       | 0.00     |
| 400.43 | 0.0       | 0.00     |
| 401.13 | 0.0       | 0.00     |
| 401.95 | 0.0       | 0.00     |
| 403.29 | 0.0       | 0.00     |
| 404.90 | 1.4       | 0.00     |
| 405.75 | 0.0       | 0.00     |
| 406.35 | 23.4      | 0.03     |
| 406.97 | 0.0       | 0.00     |
| 407.94 | 0.0       | 0.00     |
| 408.57 | 0.1       | 0.00     |
| 409.38 | 0.0       | 0.00     |
| 410.88 | 0.0       | 0.00     |
| 411.57 | 0.0       | 0.00     |
| 412.81 | 36.3      | 0.05     |
| 413.69 | 0.1       | 0.00     |
| 414.53 | 0.0       | 0.00     |
| 415.21 | 0.0       | 0.00     |
| 415.72 | 0.1       | 0.00     |
| 416.47 | 0.0       | 0.00     |
| 417.02 | 1.4       | 0.00     |
| 418.53 | 0.0       | 0.00     |
| 419.04 | 0.0       | 0.00     |

Selwan-39A#170 RT: 0.61

T: {0,0} + c EI Full ms [50.00-1000.00]

m/z= 50.00-1000.04

| m/z    | Intensity | Relative |
|--------|-----------|----------|
| 419.73 | 0.0       | 0.00     |
| 420.83 | 0.0       | 0.00     |
| 421.69 | 0.0       | 0.00     |
| 422.50 | 0.0       | 0.00     |
| 423.07 | 0.0       | 0.00     |
| 423.70 | 0.0       | 0.00     |
| 424.24 | 0.2       | 0.00     |
| 425.08 | 0.0       | 0.00     |
| 426.76 | 63.2      | 0.09     |
| 427.69 | 0.0       | 0.00     |
| 429.22 | 0.0       | 0.00     |
| 430.26 | 0.0       | 0.00     |
| 431.27 | 0.0       | 0.00     |
| 432.00 | 0.0       | 0.00     |
| 433.19 | 0.0       | 0.00     |
| 434.64 | 1.5       | 0.00     |
| 436.28 | 0.0       | 0.00     |
| 437.40 | 0.2       | 0.00     |
| 438.90 | 0.0       | 0.00     |
| 439.66 | 0.4       | 0.00     |
| 440.37 | 49.5      | 0.07     |
| 441.70 | 0.0       | 0.00     |
| 442.52 | 0.0       | 0.00     |
| 445.34 | 0.0       | 0.00     |
| 446.15 | 0.0       | 0.00     |
| 448.23 | 0.0       | 0.00     |
| 448.97 | 43.2      | 0.06     |
| 449.83 | 36.7      | 0.05     |
| 450.63 | 0.0       | 0.00     |
| 451.57 | 0.2       | 0.00     |
| 452.58 | 0.0       | 0.00     |
| 453.20 | 0.0       | 0.00     |
| 454.09 | 0.0       | 0.00     |
| 454.98 | 0.3       | 0.00     |
| 455.51 | 0.0       | 0.00     |
| 456.27 | 1.3       | 0.00     |
| 457.08 | 0.2       | 0.00     |
| 457.59 | 13.6      | 0.02     |
| 460.34 | 0.2       | 0.00     |
| 460.88 | 0.0       | 0.00     |
| 461.64 | 0.0       | 0.00     |
| 463.12 | 0.0       | 0.00     |
| 465.55 | 0.0       | 0.00     |
| 466.38 | 0.0       | 0.00     |
| 467.02 | 0.1       | 0.00     |
| 468.78 | 0.0       | 0.00     |
| 470.17 | 0.4       | 0.00     |
| 471.64 | 0.0       | 0.00     |
| 473.75 | 0.0       | 0.00     |
| 474.47 | 18.3      | 0.03     |
| 475.58 | 0.0       | 0.00     |
| 476.15 | 0.0       | 0.00     |
| 476.98 | 0.0       | 0.00     |
| 478.18 | 215.4     | 0.30     |
| 479.26 | 0.0       | 0.00     |

Selwan-39A#170 RT: 0.61

T: {0,0} + c EI Full ms [50.00-1000.00]

m/z= 50.00-1000.04

| m/z    | Intensity | Relative |
|--------|-----------|----------|
| 480.22 | 0.0       | 0.00     |
| 480.93 | 0.0       | 0.00     |
| 481.53 | 0.0       | 0.00     |
| 482.49 | 0.0       | 0.00     |
| 483.86 | 23.0      | 0.03     |
| 484.63 | 0.3       | 0.00     |
| 486.35 | 0.3       | 0.00     |
| 487.02 | 0.0       | 0.00     |
| 489.32 | 0.2       | 0.00     |
| 491.51 | 0.0       | 0.00     |
| 492.20 | 0.0       | 0.00     |
| 493.03 | 0.0       | 0.00     |
| 494.07 | 0.0       | 0.00     |
| 495.52 | 0.0       | 0.00     |
| 496.57 | 0.0       | 0.00     |
| 497.65 | 0.0       | 0.00     |
| 498.43 | 0.0       | 0.00     |
| 499.87 | 0.0       | 0.00     |
| 500.80 | 0.0       | 0.00     |
| 502.02 | 0.0       | 0.00     |
| 503.20 | 0.0       | 0.00     |
| 504.53 | 0.0       | 0.00     |
| 505.22 | 0.0       | 0.00     |
| 507.11 | 0.0       | 0.00     |
| 507.89 | 0.0       | 0.00     |
| 509.75 | 0.0       | 0.00     |
| 510.40 | 0.0       | 0.00     |
| 511.88 | 0.0       | 0.00     |
| 512.62 | 0.0       | 0.00     |
| 513.16 | 0.3       | 0.00     |
| 513.97 | 0.0       | 0.00     |
| 514.71 | 0.0       | 0.00     |
| 515.44 | 0.1       | 0.00     |
| 516.13 | 0.1       | 0.00     |
| 516.97 | 0.0       | 0.00     |
| 517.64 | 0.0       | 0.00     |
| 518.21 | 0.0       | 0.00     |
| 518.84 | 0.0       | 0.00     |
| 520.00 | 0.0       | 0.00     |
| 520.52 | 0.0       | 0.00     |
| 521.33 | 0.0       | 0.00     |
| 523.87 | 0.0       | 0.00     |
| 524.88 | 0.0       | 0.00     |
| 526.48 | 0.0       | 0.00     |
| 527.21 | 0.0       | 0.00     |
| 527.91 | 0.0       | 0.00     |
| 529.15 | 0.0       | 0.00     |
| 530.36 | 0.0       | 0.00     |
| 530.88 | 0.0       | 0.00     |
| 532.26 | 0.1       | 0.00     |
| 533.25 | 0.1       | 0.00     |
| 534.53 | 0.0       | 0.00     |
| 535.64 | 0.0       | 0.00     |
| 536.27 | 0.0       | 0.00     |
| 537.11 | 0.3       | 0.00     |

Selwan-39A#170 RT: 0.61

T: {0,0} + c EI Full ms [50.00-1000.00]

m/z= 50.00-1000.04

| m/z    | Intensity | Relative |
|--------|-----------|----------|
| 537.92 | 0.0       | 0.00     |
| 539.04 | 0.0       | 0.00     |
| 539.85 | 0.0       | 0.00     |
| 540.59 | 0.0       | 0.00     |
| 541.47 | 0.0       | 0.00     |
| 542.15 | 0.0       | 0.00     |
| 542.75 | 0.1       | 0.00     |
| 544.04 | 0.0       | 0.00     |
| 546.01 | 0.0       | 0.00     |
| 547.89 | 0.0       | 0.00     |
| 548.67 | 0.0       | 0.00     |
| 549.79 | 13.6      | 0.02     |
| 550.95 | 0.0       | 0.00     |
| 552.09 | 0.1       | 0.00     |
| 553.58 | 0.0       | 0.00     |
| 554.57 | 0.0       | 0.00     |
| 555.27 | 0.0       | 0.00     |
| 556.50 | 0.1       | 0.00     |
| 557.76 | 0.0       | 0.00     |
| 559.02 | 41.9      | 0.06     |
| 559.96 | 0.0       | 0.00     |
| 561.03 | 0.0       | 0.00     |
| 561.53 | 0.0       | 0.00     |
| 562.87 | 0.0       | 0.00     |
| 563.73 | 0.0       | 0.00     |
| 564.46 | 0.0       | 0.00     |
| 565.27 | 0.0       | 0.00     |
| 566.63 | 372.2     | 0.52     |
| 568.10 | 13.7      | 0.02     |
| 569.11 | 1.1       | 0.00     |
| 569.94 | 0.0       | 0.00     |
| 570.66 | 0.0       | 0.00     |
| 572.81 | 0.1       | 0.00     |
| 573.37 | 0.0       | 0.00     |
| 574.76 | 0.0       | 0.00     |
| 575.56 | 0.0       | 0.00     |
| 576.63 | 0.0       | 0.00     |
| 577.37 | 0.0       | 0.00     |
| 578.77 | 0.0       | 0.00     |
| 579.73 | 0.0       | 0.00     |
| 580.58 | 0.0       | 0.00     |
| 582.16 | 0.2       | 0.00     |
| 584.06 | 1.5       | 0.00     |
| 584.62 | 0.0       | 0.00     |
| 585.27 | 0.0       | 0.00     |
| 586.21 | 0.0       | 0.00     |
| 586.80 | 0.0       | 0.00     |
| 588.06 | 0.0       | 0.00     |
| 588.61 | 0.0       | 0.00     |
| 589.52 | 0.3       | 0.00     |
| 590.41 | 0.0       | 0.00     |
| 591.20 | 0.0       | 0.00     |
| 592.69 | 0.0       | 0.00     |
| 593.30 | 0.0       | 0.00     |
| 594.45 | 0.0       | 0.00     |

Selwan-39A#170 RT: 0.61

T: {0,0} + c EI Full ms [50.00-1000.00]

m/z= 50.00-1000.04

| m/z    | Intensity | Relative |
|--------|-----------|----------|
| 595.16 | 0.2       | 0.00     |
| 596.20 | 318.5     | 0.45     |
| 597.69 | 0.0       | 0.00     |
| 598.32 | 0.4       | 0.00     |
| 598.92 | 0.0       | 0.00     |
| 599.91 | 0.0       | 0.00     |
| 600.64 | 0.0       | 0.00     |
| 601.46 | 0.0       | 0.00     |
| 602.38 | 0.0       | 0.00     |
| 603.27 | 0.0       | 0.00     |
| 604.20 | 0.0       | 0.00     |
| 604.95 | 0.0       | 0.00     |
| 606.40 | 0.0       | 0.00     |
| 607.28 | 0.0       | 0.00     |
| 608.34 | 0.0       | 0.00     |
| 609.36 | 0.0       | 0.00     |
| 609.95 | 0.0       | 0.00     |
| 611.81 | 0.0       | 0.00     |
| 612.59 | 0.0       | 0.00     |
| 613.40 | 0.0       | 0.00     |
| 614.04 | 0.0       | 0.00     |
| 615.15 | 0.1       | 0.00     |
| 616.28 | 0.0       | 0.00     |
| 617.78 | 0.0       | 0.00     |
| 618.42 | 0.0       | 0.00     |
| 619.12 | 0.3       | 0.00     |
| 619.78 | 0.3       | 0.00     |
| 620.56 | 0.0       | 0.00     |
| 621.66 | 0.0       | 0.00     |
| 622.39 | 0.0       | 0.00     |
| 623.67 | 0.0       | 0.00     |
| 624.56 | 0.0       | 0.00     |
| 625.34 | 0.0       | 0.00     |
| 626.47 | 0.0       | 0.00     |
| 627.09 | 0.1       | 0.00     |
| 628.07 | 0.0       | 0.00     |
| 628.64 | 0.0       | 0.00     |
| 629.19 | 0.0       | 0.00     |
| 629.89 | 0.0       | 0.00     |
| 631.02 | 0.3       | 0.00     |
| 632.01 | 0.2       | 0.00     |
| 632.80 | 0.0       | 0.00     |
| 633.81 | 0.0       | 0.00     |
| 634.82 | 0.0       | 0.00     |
| 636.06 | 0.0       | 0.00     |
| 637.03 | 0.0       | 0.00     |
| 638.29 | 0.0       | 0.00     |
| 639.18 | 0.0       | 0.00     |
| 640.09 | 0.0       | 0.00     |
| 641.34 | 0.0       | 0.00     |
| 642.78 | 0.0       | 0.00     |
| 643.73 | 0.0       | 0.00     |
| 644.78 | 0.0       | 0.00     |
| 645.49 | 0.0       | 0.00     |
| 646.45 | 0.0       | 0.00     |

Selwan-39A#170 RT: 0.61

T: {0,0} + c EI Full ms [50.00-1000.00]

m/z= 50.00-1000.04

| m/z    | Intensity | Relative |
|--------|-----------|----------|
| 647.09 | 0.0       | 0.00     |
| 647.92 | 0.0       | 0.00     |
| 648.67 | 0.0       | 0.00     |
| 649.40 | 0.0       | 0.00     |
| 649.91 | 0.0       | 0.00     |
| 650.49 | 0.0       | 0.00     |
| 651.70 | 0.0       | 0.00     |
| 652.65 | 0.0       | 0.00     |
| 653.41 | 0.0       | 0.00     |
| 654.48 | 0.0       | 0.00     |
| 655.56 | 16.0      | 0.02     |
| 656.19 | 0.0       | 0.00     |
| 657.10 | 0.0       | 0.00     |
| 657.65 | 0.0       | 0.00     |
| 658.33 | 0.0       | 0.00     |
| 659.04 | 0.0       | 0.00     |
| 660.05 | 0.0       | 0.00     |
| 660.58 | 0.0       | 0.00     |
| 661.30 | 0.0       | 0.00     |
| 661.92 | 0.0       | 0.00     |
| 662.91 | 0.0       | 0.00     |
| 664.78 | 0.0       | 0.00     |
| 665.96 | 0.0       | 0.00     |
| 667.35 | 0.0       | 0.00     |
| 667.99 | 0.0       | 0.00     |
| 668.54 | 0.0       | 0.00     |
| 669.40 | 0.0       | 0.00     |
| 670.07 | 0.0       | 0.00     |
| 671.58 | 0.4       | 0.00     |
| 672.52 | 0.0       | 0.00     |
| 673.72 | 1.7       | 0.00     |
| 675.03 | 0.1       | 0.00     |
| 676.44 | 376.5     | 0.53     |
| 677.86 | 0.0       | 0.00     |
| 678.92 | 0.0       | 0.00     |
| 679.42 | 11.0      | 0.02     |
| 680.49 | 0.0       | 0.00     |
| 681.14 | 0.0       | 0.00     |
| 682.96 | 0.0       | 0.00     |
| 683.61 | 0.3       | 0.00     |
| 684.72 | 0.0       | 0.00     |
| 685.77 | 0.1       | 0.00     |
| 686.62 | 0.1       | 0.00     |
| 687.71 | 1.4       | 0.00     |
| 688.45 | 0.0       | 0.00     |
| 688.99 | 0.0       | 0.00     |
| 689.73 | 0.0       | 0.00     |
| 690.95 | 0.2       | 0.00     |
| 692.02 | 0.0       | 0.00     |
| 692.89 | 0.0       | 0.00     |
| 695.09 | 0.6       | 0.00     |
| 696.01 | 0.0       | 0.00     |
| 697.43 | 0.0       | 0.00     |
| 698.37 | 0.0       | 0.00     |
| 699.83 | 0.0       | 0.00     |

Selwan-39A#170 RT: 0.61

T: {0,0} + c EI Full ms [50.00-1000.00]

m/z= 50.00-1000.04

| m/z    | Intensity | Relative |
|--------|-----------|----------|
| 700.56 | 0.0       | 0.00     |
| 701.12 | 0.2       | 0.00     |
| 702.05 | 0.2       | 0.00     |
| 703.06 | 0.0       | 0.00     |
| 703.67 | 8.7       | 0.01     |
| 705.12 | 0.0       | 0.00     |
| 706.07 | 18.4      | 0.03     |
| 706.98 | 0.0       | 0.00     |
| 707.98 | 0.0       | 0.00     |
| 709.67 | 0.2       | 0.00     |
| 710.35 | 0.0       | 0.00     |
| 710.96 | 0.0       | 0.00     |
| 711.50 | 0.0       | 0.00     |
| 712.71 | 0.0       | 0.00     |
| 714.22 | 0.0       | 0.00     |
| 715.10 | 0.0       | 0.00     |
| 716.01 | 0.0       | 0.00     |
| 716.89 | 0.1       | 0.00     |
| 717.42 | 0.4       | 0.00     |
| 718.05 | 0.2       | 0.00     |
| 719.33 | 0.0       | 0.00     |
| 720.64 | 0.0       | 0.00     |
| 721.44 | 0.0       | 0.00     |
| 722.39 | 0.0       | 0.00     |
| 723.06 | 0.0       | 0.00     |
| 723.85 | 0.0       | 0.00     |
| 724.85 | 0.0       | 0.00     |
| 725.68 | 0.0       | 0.00     |
| 726.24 | 0.0       | 0.00     |
| 726.87 | 0.0       | 0.00     |
| 727.96 | 0.0       | 0.00     |
| 728.95 | 0.0       | 0.00     |
| 729.56 | 0.1       | 0.00     |
| 730.63 | 23.5      | 0.03     |
| 731.76 | 0.1       | 0.00     |
| 733.16 | 0.0       | 0.00     |
| 733.97 | 0.0       | 0.00     |
| 735.62 | 0.2       | 0.00     |
| 736.52 | 0.0       | 0.00     |
| 737.37 | 0.0       | 0.00     |
| 738.78 | 0.0       | 0.00     |
| 739.35 | 0.0       | 0.00     |
| 740.49 | 36.3      | 0.05     |
| 741.90 | 0.0       | 0.00     |
| 742.64 | 0.0       | 0.00     |
| 743.26 | 24.5      | 0.03     |
| 744.58 | 0.0       | 0.00     |
| 745.52 | 0.0       | 0.00     |
| 746.09 | 0.0       | 0.00     |
| 747.20 | 0.0       | 0.00     |
| 748.58 | 0.0       | 0.00     |
| 749.40 | 0.0       | 0.00     |
| 750.33 | 0.0       | 0.00     |
| 750.84 | 0.0       | 0.00     |
| 752.03 | 0.0       | 0.00     |

Selwan-39A#170 RT: 0.61

T: {0,0} + c EI Full ms [50.00-1000.00]

m/z= 50.00-1000.04

| m/z    | Intensity | Relative |
|--------|-----------|----------|
| 753.14 | 0.0       | 0.00     |
| 754.04 | 0.0       | 0.00     |
| 754.77 | 0.0       | 0.00     |
| 755.47 | 0.0       | 0.00     |
| 756.41 | 0.0       | 0.00     |
| 757.53 | 0.0       | 0.00     |
| 758.15 | 0.1       | 0.00     |
| 759.20 | 0.0       | 0.00     |
| 760.82 | 0.0       | 0.00     |
| 761.65 | 0.0       | 0.00     |
| 762.75 | 0.0       | 0.00     |
| 763.72 | 0.0       | 0.00     |
| 764.34 | 0.0       | 0.00     |
| 765.70 | 49.7      | 0.07     |
| 766.78 | 0.0       | 0.00     |
| 767.72 | 0.0       | 0.00     |
| 769.61 | 0.0       | 0.00     |
| 771.07 | 0.4       | 0.00     |
| 772.28 | 0.0       | 0.00     |
| 773.09 | 0.0       | 0.00     |
| 773.95 | 0.0       | 0.00     |
| 775.09 | 0.0       | 0.00     |
| 775.98 | 0.0       | 0.00     |
| 777.18 | 0.0       | 0.00     |
| 778.36 | 0.0       | 0.00     |
| 779.25 | 0.0       | 0.00     |
| 780.50 | 0.0       | 0.00     |
| 781.62 | 0.0       | 0.00     |
| 782.84 | 0.0       | 0.00     |
| 784.03 | 0.0       | 0.00     |
| 784.64 | 0.0       | 0.00     |
| 785.27 | 0.0       | 0.00     |
| 785.84 | 0.0       | 0.00     |
| 786.37 | 0.0       | 0.00     |
| 787.33 | 1.5       | 0.00     |
| 788.28 | 0.0       | 0.00     |
| 789.35 | 0.0       | 0.00     |
| 790.58 | 0.0       | 0.00     |
| 791.93 | 0.0       | 0.00     |
| 792.95 | 16.6      | 0.02     |
| 793.47 | 0.0       | 0.00     |
| 794.34 | 0.0       | 0.00     |
| 794.95 | 0.0       | 0.00     |
| 795.53 | 0.0       | 0.00     |
| 796.47 | 0.0       | 0.00     |
| 797.71 | 0.0       | 0.00     |
| 799.39 | 0.0       | 0.00     |
| 799.99 | 0.0       | 0.00     |
| 800.51 | 0.1       | 0.00     |
| 801.68 | 0.0       | 0.00     |
| 802.45 | 0.0       | 0.00     |
| 803.04 | 0.0       | 0.00     |
| 803.78 | 0.0       | 0.00     |
| 805.41 | 0.0       | 0.00     |
| 806.33 | 0.0       | 0.00     |



Selwan-39A#170 RT: 0.61

T: {0,0} + c EI Full ms [50.00-1000.00]

m/z= 50.00-1000.04

| m/z    | Intensity | Relative |
|--------|-----------|----------|
| 807.24 | 0.0       | 0.00     |
| 807.78 | 0.0       | 0.00     |
| 808.40 | 0.0       | 0.00     |
| 809.86 | 0.0       | 0.00     |
| 811.32 | 0.0       | 0.00     |
| 812.42 | 0.0       | 0.00     |
| 813.49 | 0.0       | 0.00     |
| 814.94 | 0.0       | 0.00     |
| 815.87 | 0.0       | 0.00     |
| 816.66 | 0.0       | 0.00     |
| 817.34 | 1.5       | 0.00     |
| 818.35 | 0.0       | 0.00     |
| 818.99 | 0.0       | 0.00     |
| 819.51 | 0.0       | 0.00     |
| 820.06 | 0.0       | 0.00     |
| 821.83 | 0.0       | 0.00     |
| 822.82 | 0.0       | 0.00     |
| 823.84 | 0.0       | 0.00     |
| 825.68 | 0.1       | 0.00     |
| 826.44 | 0.0       | 0.00     |
| 827.10 | 0.1       | 0.00     |
| 828.62 | 374.0     | 0.53     |
| 829.75 | 0.0       | 0.00     |
| 831.61 | 0.0       | 0.00     |
| 832.44 | 0.0       | 0.00     |
| 833.05 | 0.0       | 0.00     |
| 833.85 | 0.0       | 0.00     |
| 834.45 | 0.1       | 0.00     |
| 835.81 | 24.5      | 0.03     |
| 836.67 | 0.0       | 0.00     |
| 837.42 | 0.0       | 0.00     |
| 838.67 | 0.0       | 0.00     |
| 839.88 | 1.7       | 0.00     |
| 841.10 | 0.0       | 0.00     |
| 842.17 | 1.7       | 0.00     |
| 844.26 | 293.0     | 0.41     |
| 847.35 | 0.0       | 0.00     |
| 848.16 | 0.0       | 0.00     |
| 848.69 | 0.0       | 0.00     |
| 849.44 | 0.0       | 0.00     |
| 850.02 | 0.0       | 0.00     |
| 850.58 | 0.0       | 0.00     |
| 852.32 | 0.0       | 0.00     |
| 853.85 | 0.0       | 0.00     |
| 855.08 | 0.0       | 0.00     |
| 855.94 | 0.0       | 0.00     |
| 857.13 | 0.0       | 0.00     |
| 858.00 | 0.0       | 0.00     |
| 858.67 | 0.0       | 0.00     |
| 859.83 | 0.0       | 0.00     |
| 861.44 | 215.8     | 0.30     |
| 862.28 | 0.0       | 0.00     |
| 862.83 | 0.0       | 0.00     |
| 863.78 | 0.0       | 0.00     |
| 864.69 | 0.0       | 0.00     |

Selwan-39A#170 RT: 0.61

T: {0,0} + c EI Full ms [50.00-1000.00]

m/z= 50.00-1000.04

| m/z    | Intensity | Relative |
|--------|-----------|----------|
| 865.22 | 11.4      | 0.02     |
| 867.40 | 0.1       | 0.00     |
| 868.26 | 0.0       | 0.00     |
| 869.31 | 0.0       | 0.00     |
| 869.83 | 0.3       | 0.00     |
| 870.84 | 0.0       | 0.00     |
| 871.55 | 0.0       | 0.00     |
| 872.79 | 0.1       | 0.00     |
| 873.45 | 0.0       | 0.00     |
| 875.31 | 0.0       | 0.00     |
| 875.95 | 0.0       | 0.00     |
| 877.15 | 0.0       | 0.00     |
| 878.13 | 0.0       | 0.00     |
| 879.14 | 0.0       | 0.00     |
| 880.29 | 0.0       | 0.00     |
| 881.97 | 0.0       | 0.00     |
| 883.96 | 0.0       | 0.00     |
| 884.49 | 0.0       | 0.00     |
| 885.49 | 0.0       | 0.00     |
| 886.57 | 0.0       | 0.00     |
| 887.88 | 0.0       | 0.00     |
| 888.59 | 0.0       | 0.00     |
| 889.24 | 0.0       | 0.00     |
| 890.56 | 0.0       | 0.00     |
| 891.45 | 0.1       | 0.00     |
| 892.85 | 0.1       | 0.00     |
| 893.65 | 0.0       | 0.00     |
| 894.59 | 0.0       | 0.00     |
| 896.57 | 0.0       | 0.00     |
| 897.32 | 0.0       | 0.00     |
| 899.86 | 319.6     | 0.45     |
| 901.72 | 0.0       | 0.00     |
| 902.34 | 0.0       | 0.00     |
| 902.84 | 0.0       | 0.00     |
| 903.88 | 0.0       | 0.00     |
| 904.67 | 0.0       | 0.00     |
| 905.44 | 30.8      | 0.04     |
| 907.31 | 0.0       | 0.00     |
| 908.02 | 0.0       | 0.00     |
| 908.63 | 0.0       | 0.00     |
| 909.37 | 0.0       | 0.00     |
| 910.31 | 0.0       | 0.00     |
| 910.82 | 0.0       | 0.00     |
| 912.84 | 0.0       | 0.00     |
| 913.85 | 0.0       | 0.00     |
| 914.78 | 0.0       | 0.00     |
| 915.66 | 0.0       | 0.00     |
| 916.57 | 0.0       | 0.00     |
| 917.34 | 0.0       | 0.00     |
| 919.01 | 0.0       | 0.00     |
| 920.34 | 0.0       | 0.00     |
| 921.21 | 0.0       | 0.00     |
| 922.35 | 0.0       | 0.00     |
| 924.65 | 179.2     | 0.25     |
| 925.61 | 0.0       | 0.00     |

Selwan-39A#170 RT: 0.61

T: {0,0} + c EI Full ms [50.00-1000.00]

m/z= 50.00-1000.04

| m/z    | Intensity | Relative |
|--------|-----------|----------|
| 927.03 | 0.0       | 0.00     |
| 928.31 | 0.0       | 0.00     |
| 929.40 | 0.0       | 0.00     |
| 930.18 | 0.0       | 0.00     |
| 930.72 | 0.0       | 0.00     |
| 932.33 | 0.0       | 0.00     |
| 933.11 | 0.0       | 0.00     |
| 933.75 | 0.0       | 0.00     |
| 934.46 | 0.0       | 0.00     |
| 935.56 | 0.0       | 0.00     |
| 936.21 | 0.0       | 0.00     |
| 937.28 | 0.0       | 0.00     |
| 938.61 | 0.0       | 0.00     |
| 939.44 | 0.0       | 0.00     |
| 940.07 | 0.0       | 0.00     |
| 940.93 | 0.0       | 0.00     |
| 941.82 | 0.0       | 0.00     |
| 942.41 | 0.0       | 0.00     |
| 943.83 | 0.0       | 0.00     |
| 944.61 | 0.0       | 0.00     |
| 945.39 | 0.0       | 0.00     |
| 945.97 | 0.0       | 0.00     |
| 947.17 | 0.0       | 0.00     |
| 947.70 | 0.0       | 0.00     |
| 948.69 | 0.0       | 0.00     |
| 949.91 | 0.0       | 0.00     |
| 950.42 | 0.0       | 0.00     |
| 951.68 | 1.1       | 0.00     |
| 952.70 | 0.0       | 0.00     |
| 953.71 | 0.0       | 0.00     |
| 954.77 | 0.0       | 0.00     |
| 955.45 | 0.4       | 0.00     |
| 956.08 | 0.0       | 0.00     |
| 957.12 | 0.0       | 0.00     |
| 958.12 | 0.0       | 0.00     |
| 958.72 | 0.0       | 0.00     |
| 959.40 | 0.0       | 0.00     |
| 960.08 | 0.0       | 0.00     |
| 961.06 | 0.0       | 0.00     |
| 962.34 | 37.2      | 0.05     |
| 962.89 | 0.0       | 0.00     |
| 963.51 | 0.0       | 0.00     |
| 964.31 | 0.0       | 0.00     |
| 965.07 | 0.0       | 0.00     |
| 966.67 | 0.0       | 0.00     |
| 967.64 | 0.0       | 0.00     |
| 968.91 | 0.0       | 0.00     |
| 970.38 | 0.0       | 0.00     |
| 971.25 | 0.0       | 0.00     |
| 971.82 | 0.0       | 0.00     |
| 972.62 | 0.0       | 0.00     |
| 973.17 | 0.0       | 0.00     |
| 973.77 | 0.0       | 0.00     |
| 974.80 | 9.2       | 0.01     |
| 975.65 | 0.0       | 0.00     |

Selwan-39A#170 RT: 0.61

T: {0,0} + c EI Full ms [50.00-1000.00]

m/z= 50.00-1000.04

| m/z    | Intensity | Relative |
|--------|-----------|----------|
| 976.37 | 0.0       | 0.00     |
| 977.62 | 0.0       | 0.00     |
| 978.70 | 0.1       | 0.00     |
| 979.32 | 0.0       | 0.00     |
| 980.13 | 0.0       | 0.00     |
| 981.61 | 300.3     | 0.42     |
| 982.18 | 4.1       | 0.01     |
| 983.49 | 0.0       | 0.00     |
| 984.26 | 25.1      | 0.04     |
| 985.36 | 0.0       | 0.00     |
| 985.89 | 0.0       | 0.00     |
| 986.83 | 0.0       | 0.00     |
| 987.53 | 272.1     | 0.38     |
| 988.29 | 0.0       | 0.00     |
| 989.19 | 268.8     | 0.38     |
| 990.57 | 0.0       | 0.00     |
| 991.09 | 0.0       | 0.00     |
| 991.70 | 0.0       | 0.00     |
| 992.50 | 0.0       | 0.00     |
| 993.52 | 0.4       | 0.00     |
| 994.44 | 7.1       | 0.01     |
| 996.00 | 273.0     | 0.38     |
| 997.11 | 0.0       | 0.00     |
| 997.75 | 0.0       | 0.00     |
| 998.78 | 0.0       | 0.00     |
| 999.36 | 0.0       | 0.00     |
