# Supplementary figures and images for: A Simple and Efficient Multicomponent Synthesis of Novel Pyrazole, N-aminopyridine and Pyrazolo[3,4-b]Pyridine Derivatives in Water
Source: Preprints.org preprint supplement (doi:10.20944/preprints202312.1232.v1), 2023-12-28

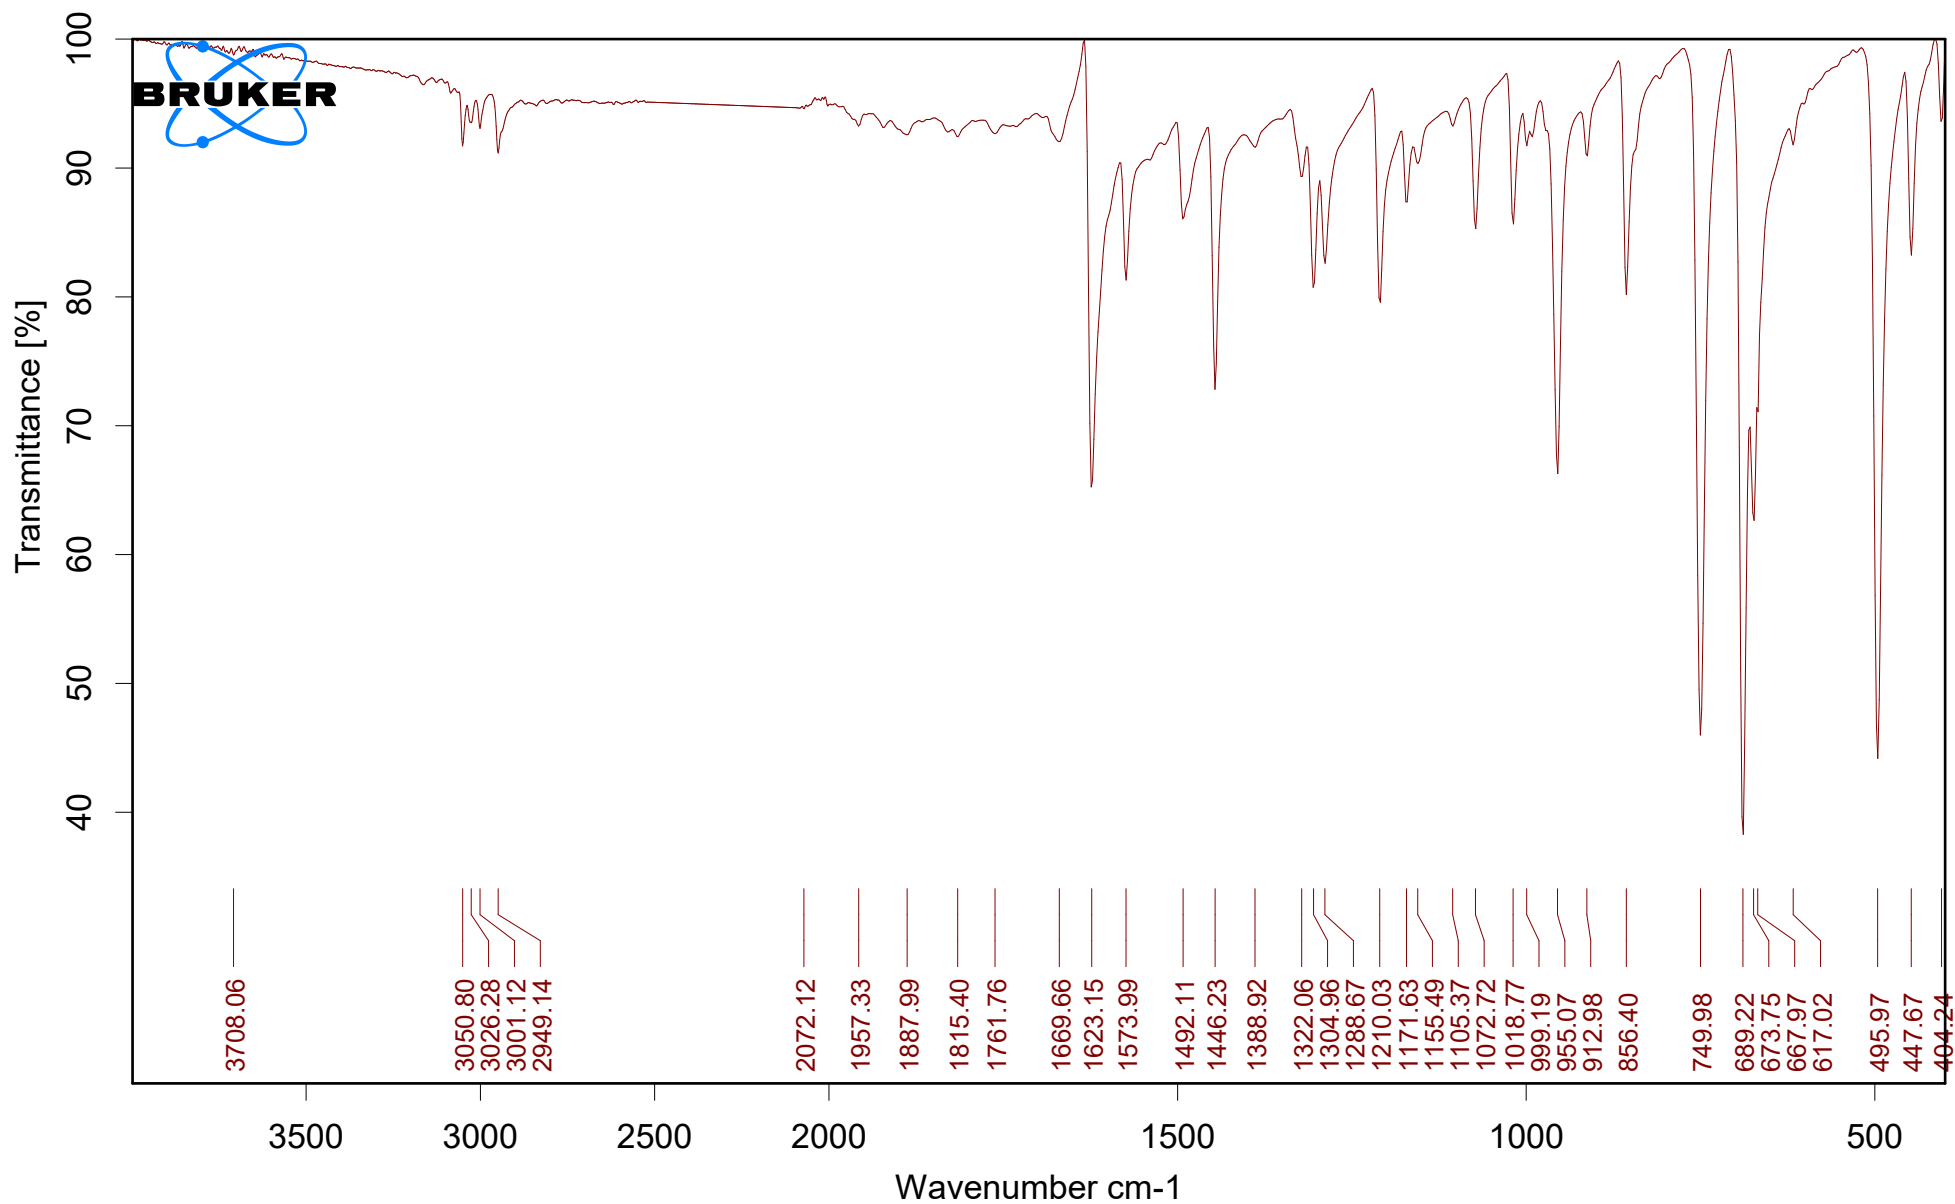

D:\Hiam abdelrahman 2022\11-1-2023\128.0

128

Sample

11/01/2023

Supplement: Supplementary file 3 [file supplementary]

Peak Find - 39A.jws

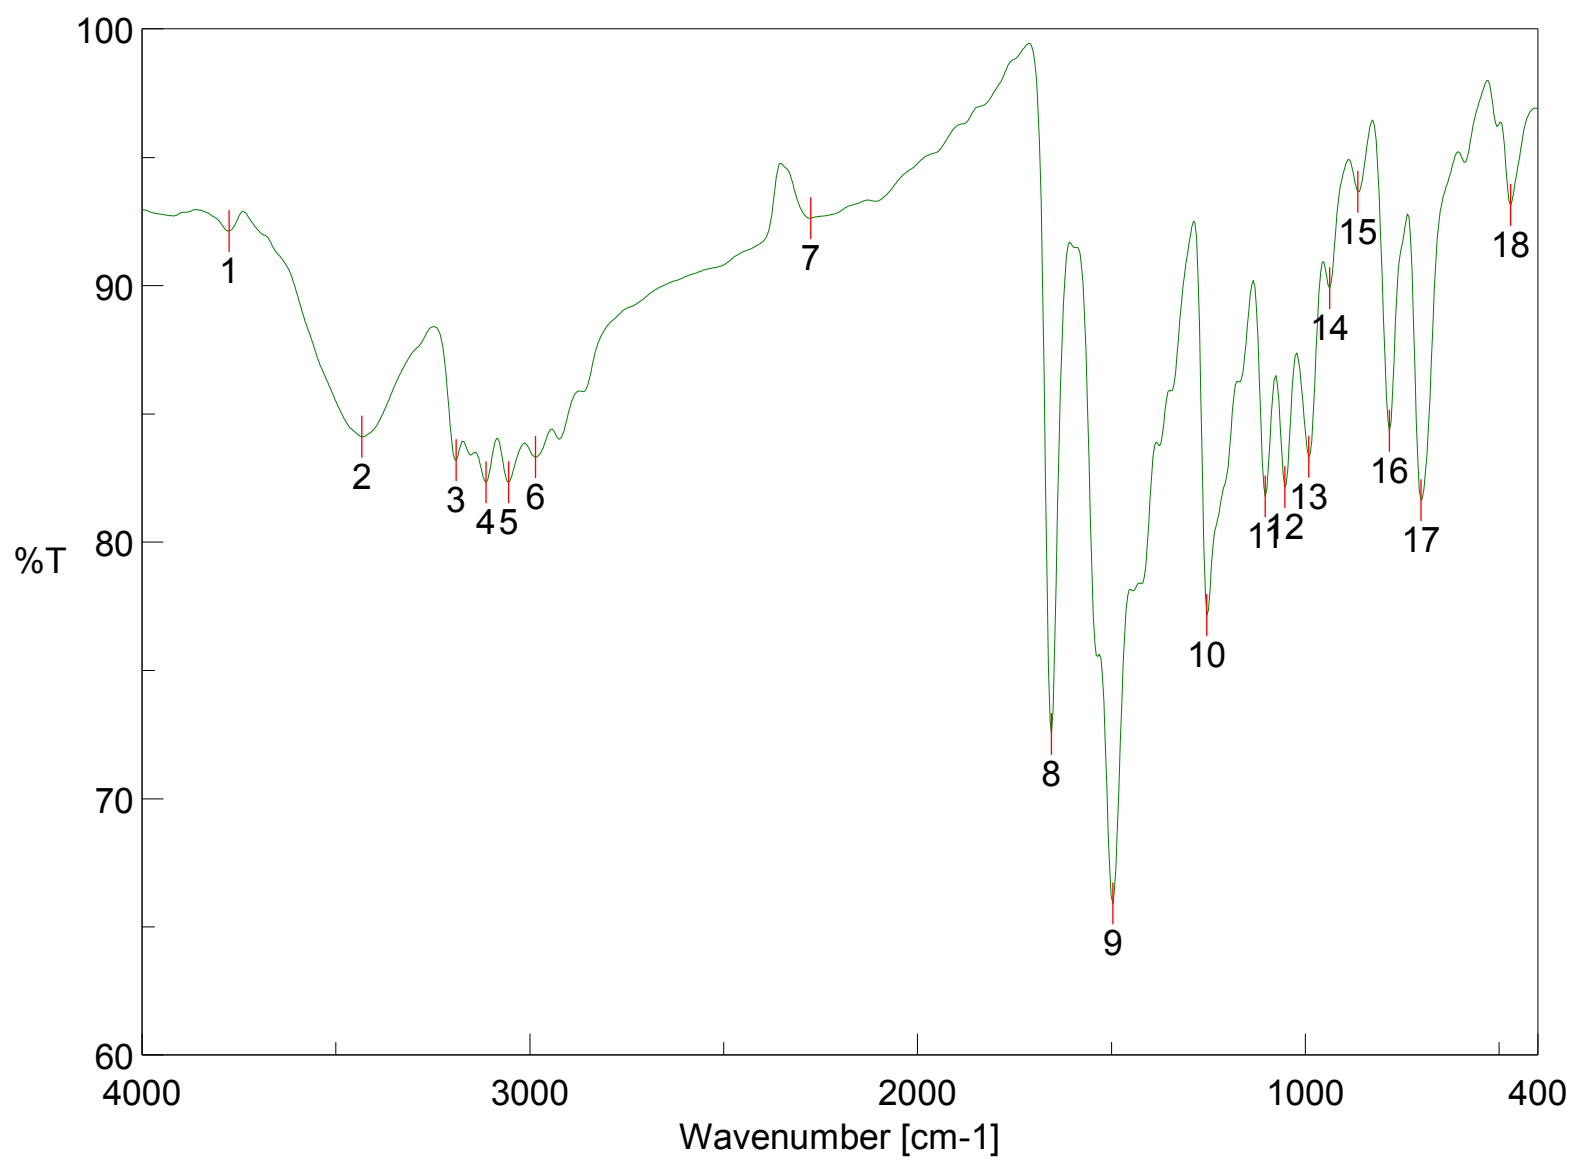

[ Result of Peak Picking ]

| No. | Position | Intensity | No. | Position | Intensity |
|-----|----------|-----------|-----|----------|-----------|
| 1   | 3775.94  | 92.1089   | 2   | 3432.67  | 84.097    |
| 3   | 3189.68  | 83.1814   | 4   | 3112.55  | 82.3256   |
| 5   | 3054.69  | 82.3201   | 6   | 2985.27  | 83.3097   |
| 7   | 2275.59  | 92.6186   | 8   | 1654.62  | 72.5129   |
| 9   | 1496.49  | 65.9065   | 10  | 1253.5   | 77.1455   |
| 11  | 1103.08  | 81.7709   | 12  | 1052.94  | 82.141    |
| 13  | 991.232  | 83.3229   | 14  | 937.235  | 89.8874   |
| 15  | 863.953  | 93.6464   | 16  | 782.958  | 84.3285   |
| 17  | 701.962  | 81.6191   | 18  | 470.546  | 93.131    |

Supplement: Supplementary file 9 [file supplementary]

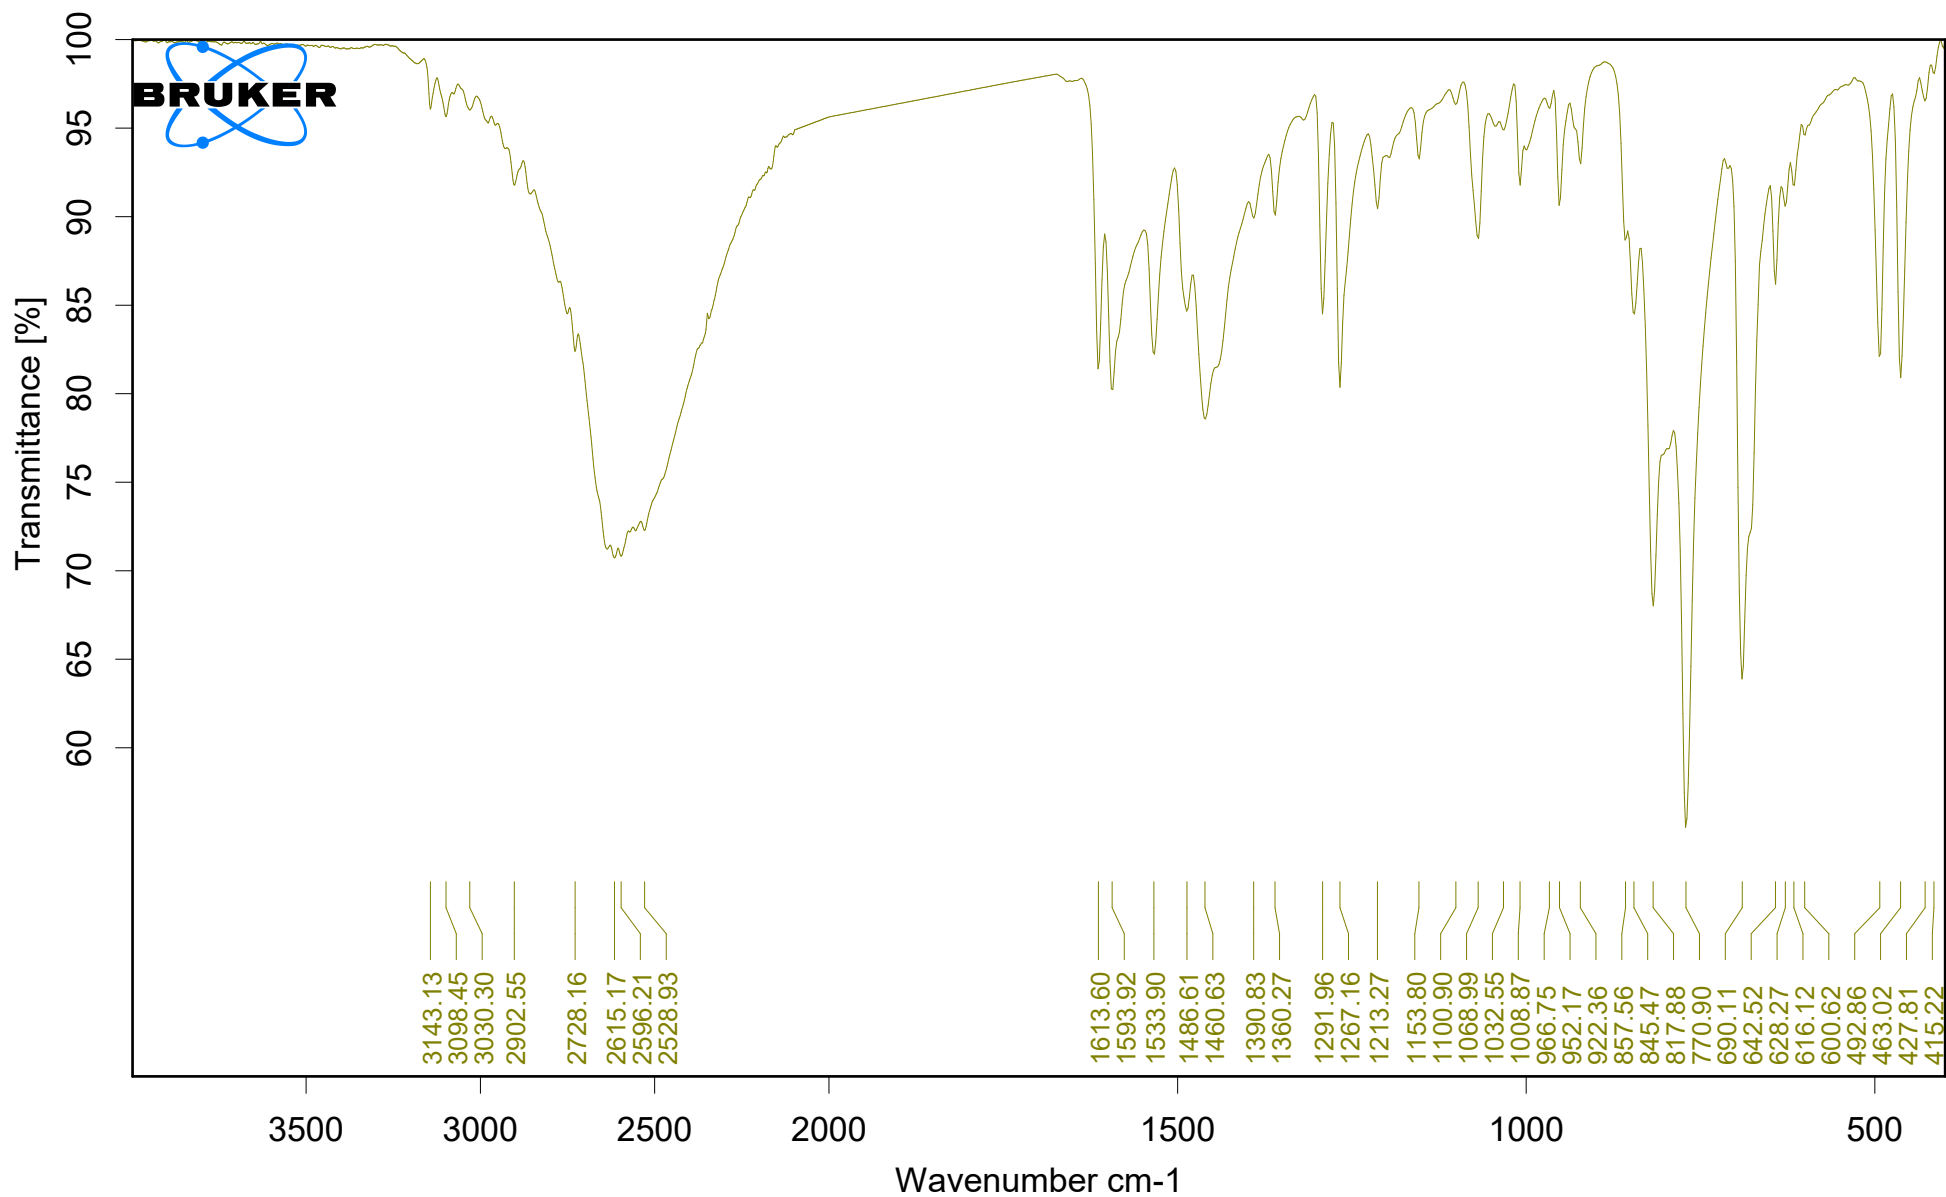

D:\Selwan\8-2-2022\65.0

65

Sample

08/02/2022

Supplement: Supplementary file 15 [file supplementary]

Peak Find - 40A.jws

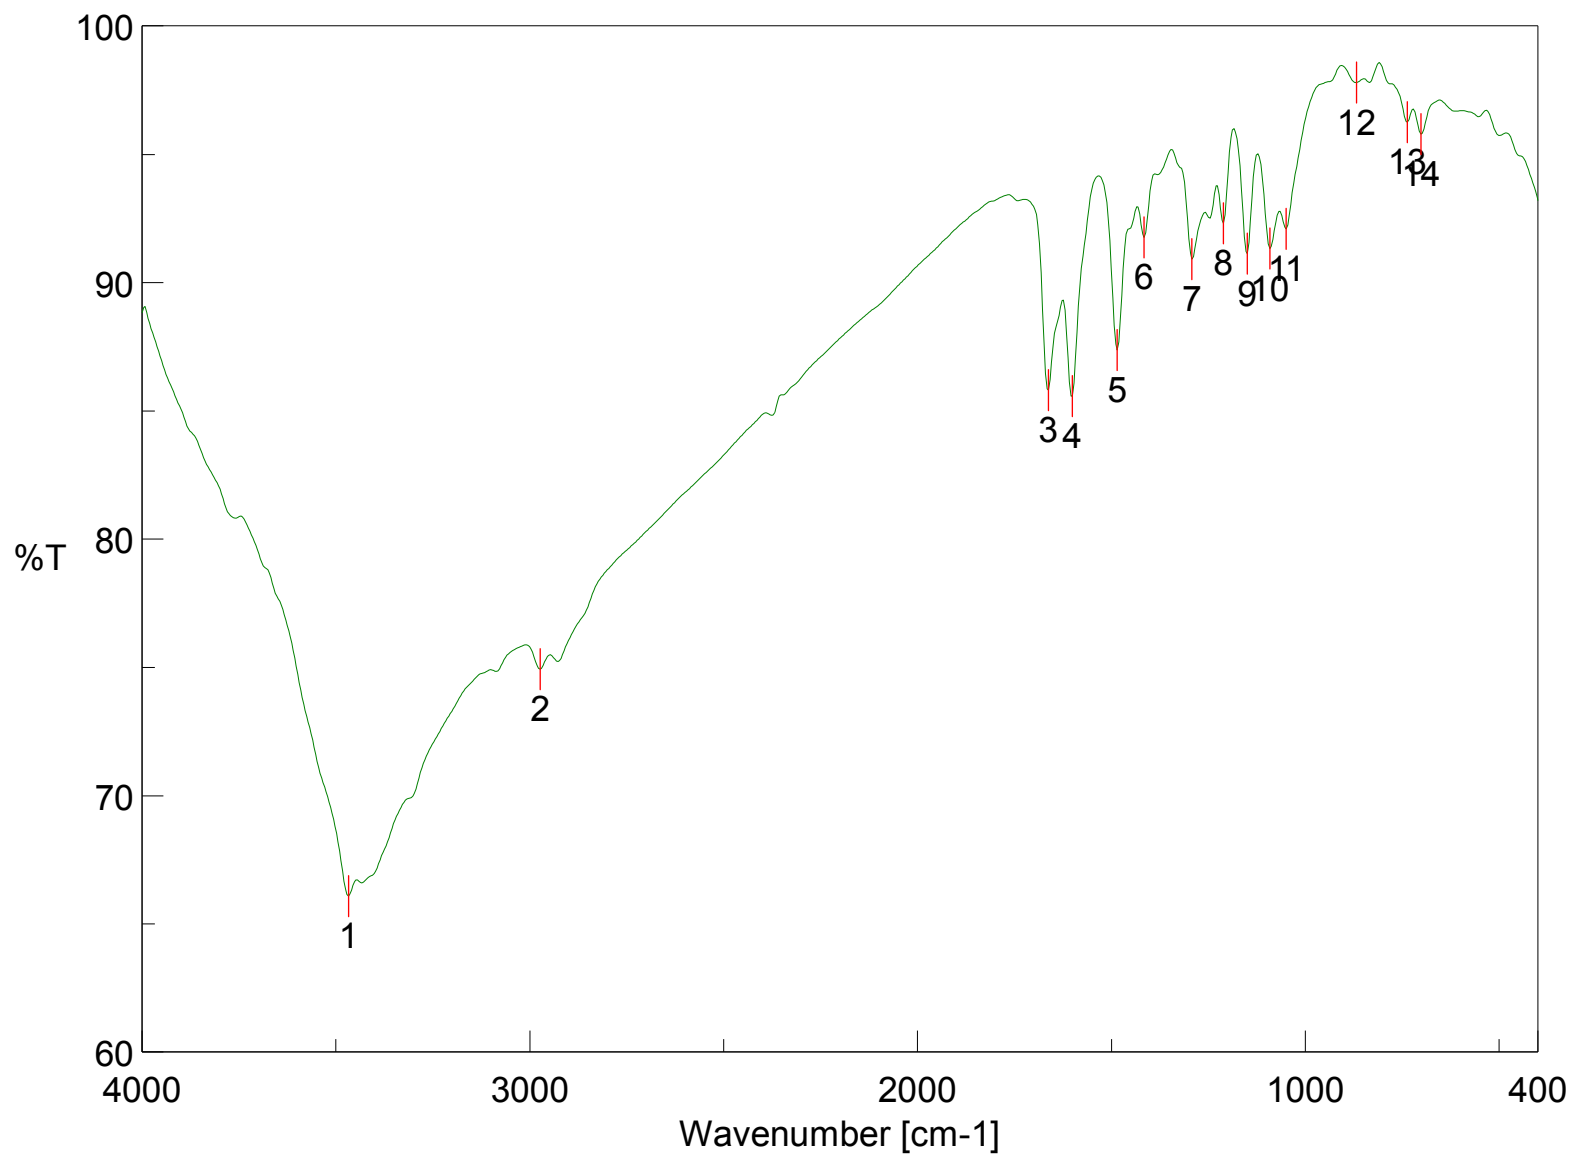

[ Result of Peak Picking ]

| No. | Position | Intensity | No. | Position | Intensity |
|-----|----------|-----------|-----|----------|-----------|
| 1   | 3467.38  | 66.0741   | 2   | 2973.7   | 74.9111   |
| 3   | 1662.34  | 85.8036   | 4   | 1600.63  | 85.5562   |
| 5   | 1484.92  | 87.3529   | 6   | 1415.49  | 91.7459   |
| 7   | 1292.07  | 90.9097   | 8   | 1211.08  | 92.2986   |
| 9   | 1149.37  | 91.1188   | 10  | 1091.51  | 91.313    |
| 11  | 1049.09  | 92.077    | 12  | 867.81   | 97.7818   |
| 13  | 736.674  | 96.2369   | 14  | 701.962  | 95.7803   |

Supplement: Supplementary file 26 [file supplementary]

Salwan-62-DMSO-C13

Salwan-62-DMSO-C13

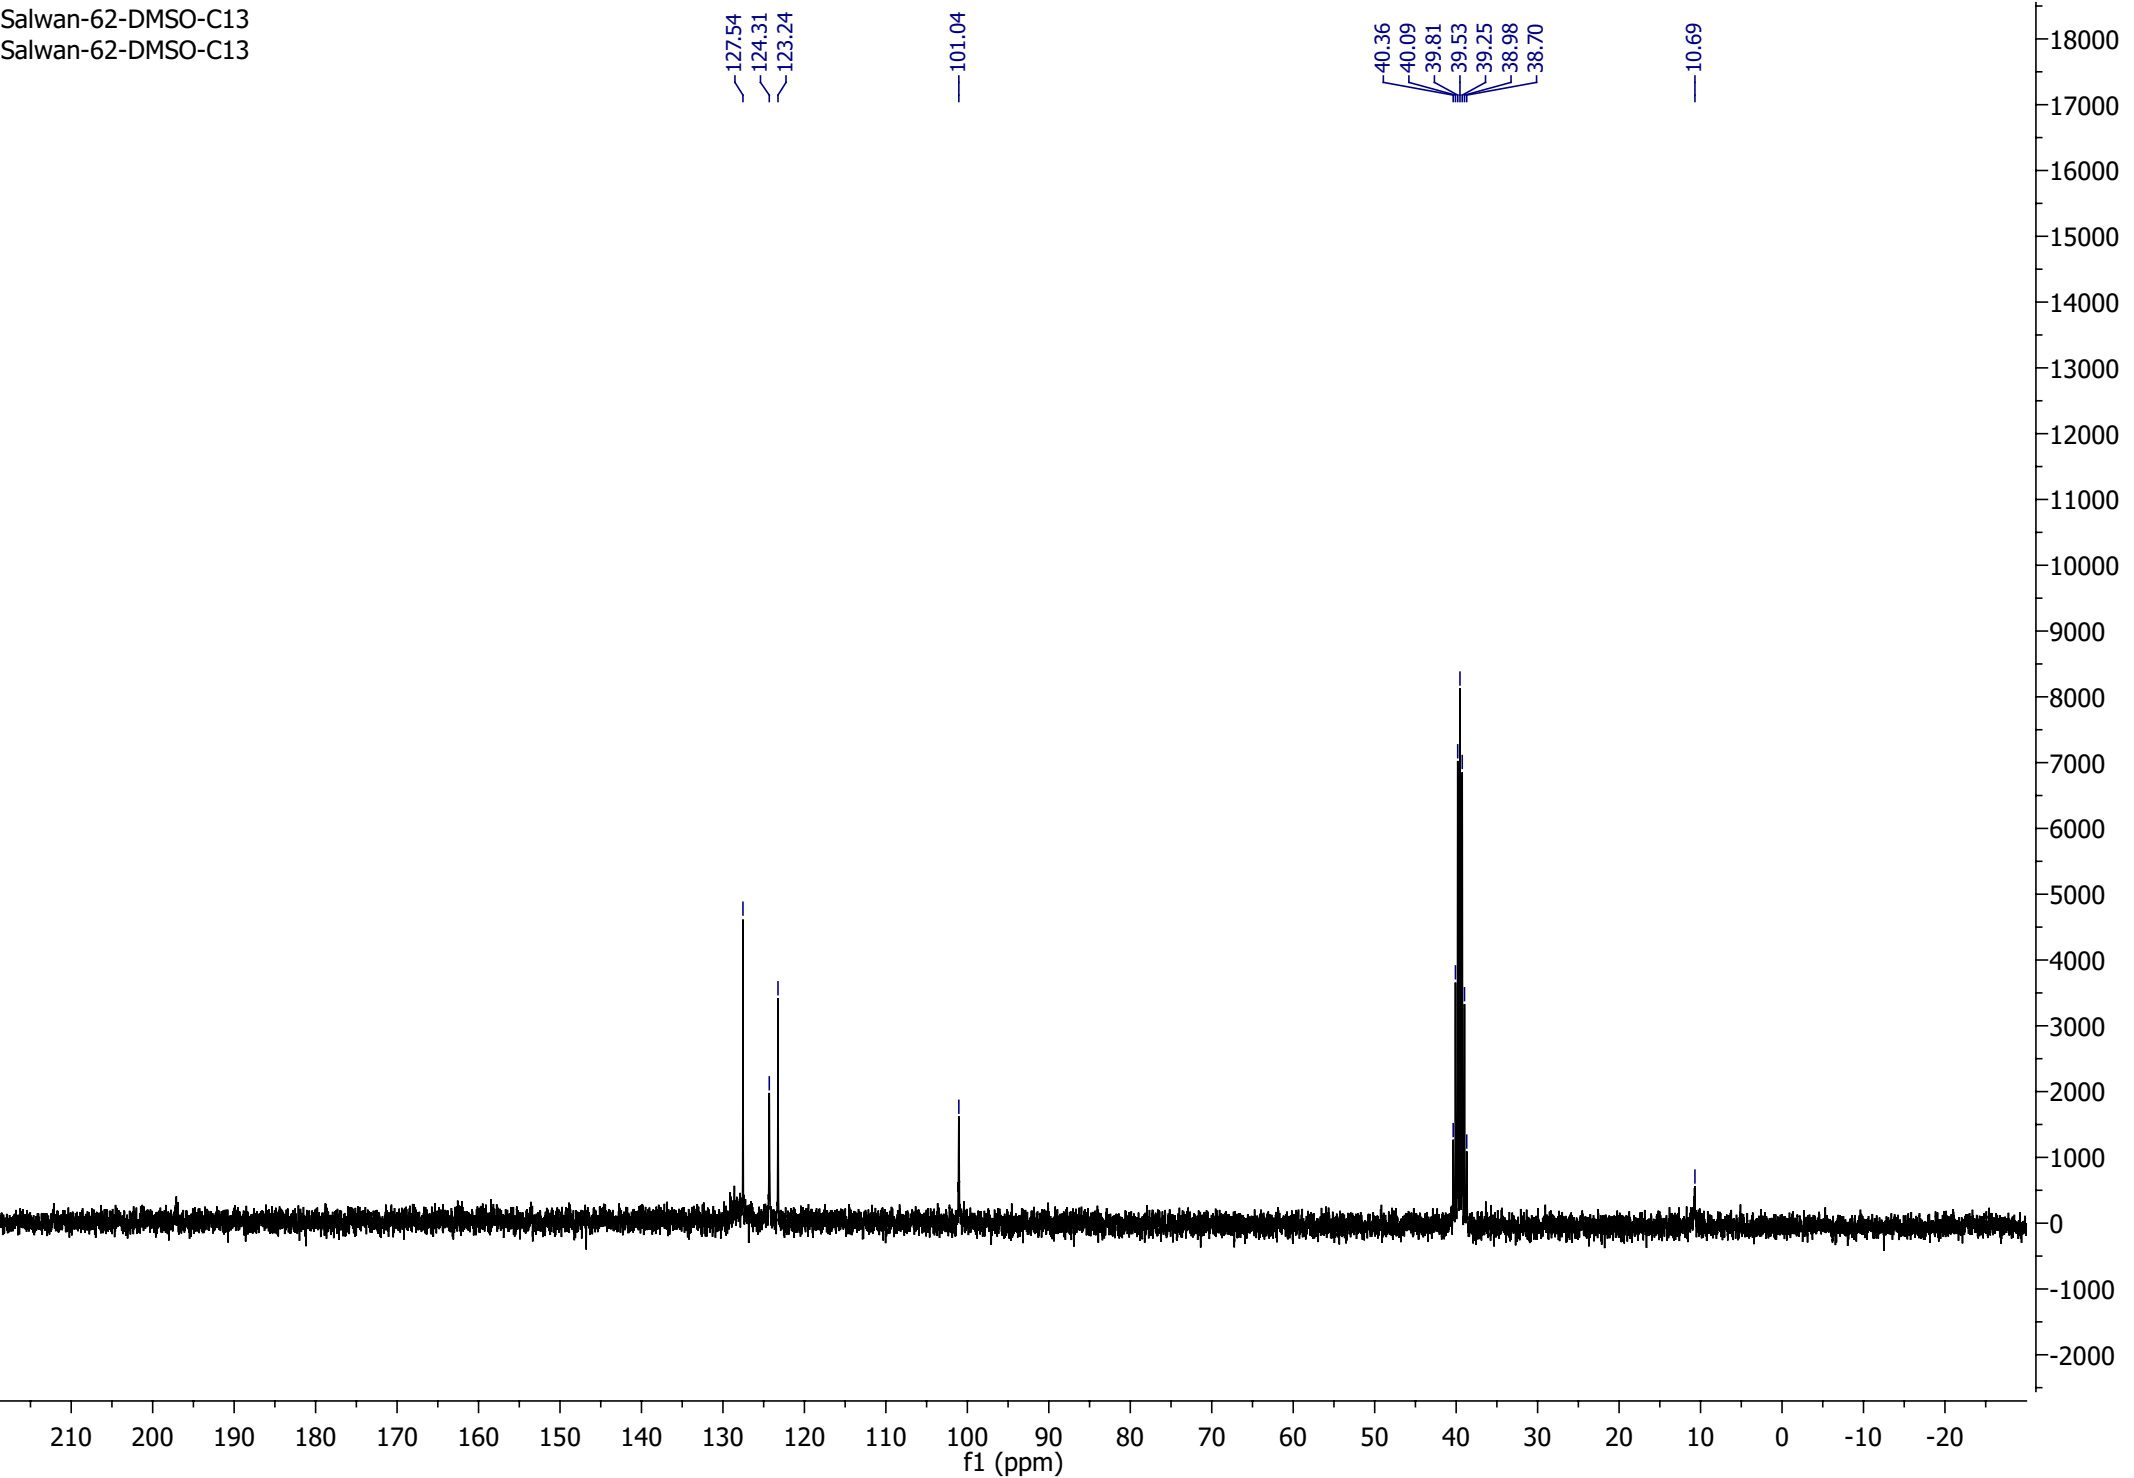

Supplement: Supplementary file 31 [file supplementary]

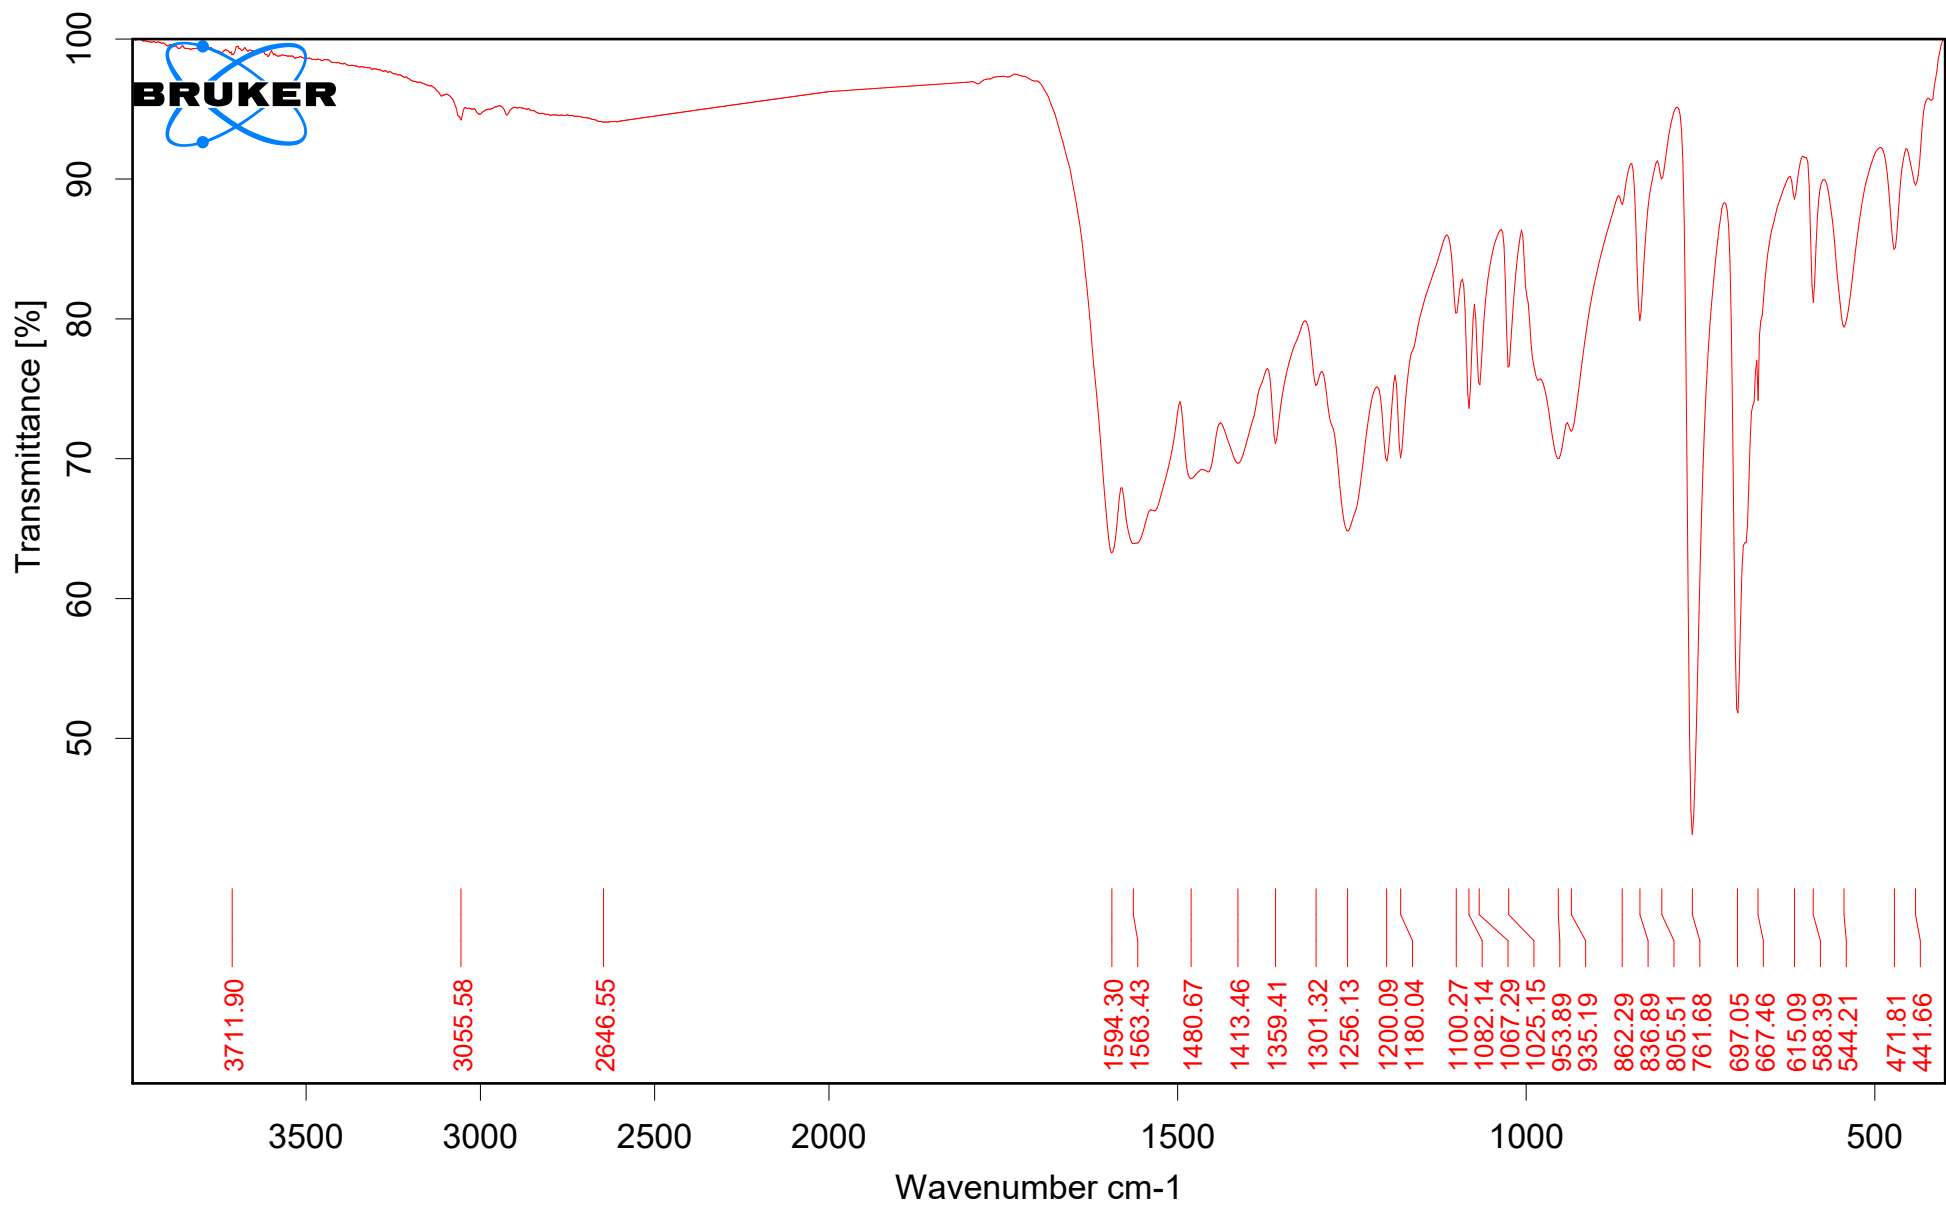

D:\Selwan\8-2-2022\59.0

59

Sample

08/02/2022

Supplement: Supplementary file 32 [file supplementary]

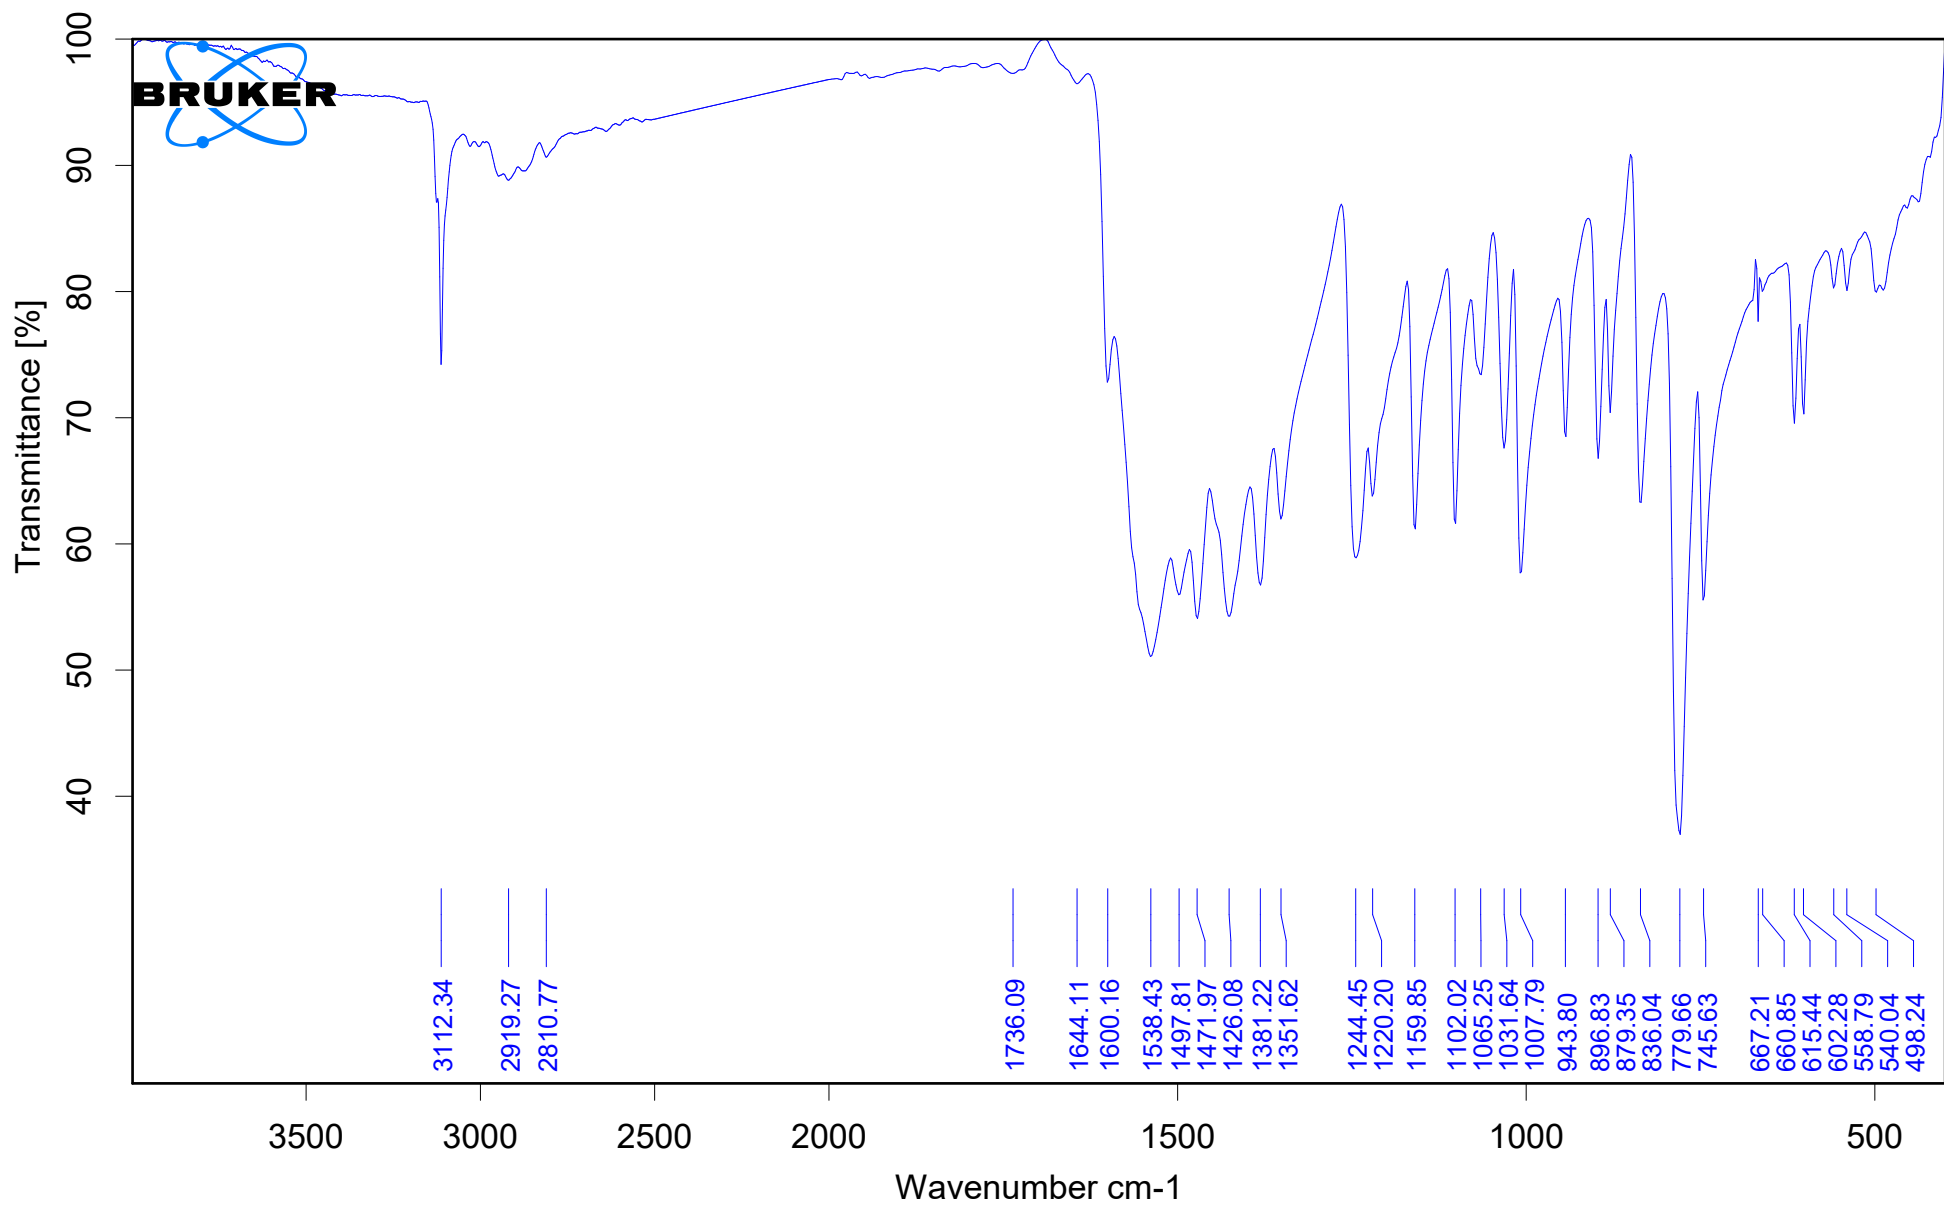

Supplement: Supplementary file 36 [file supplementary]

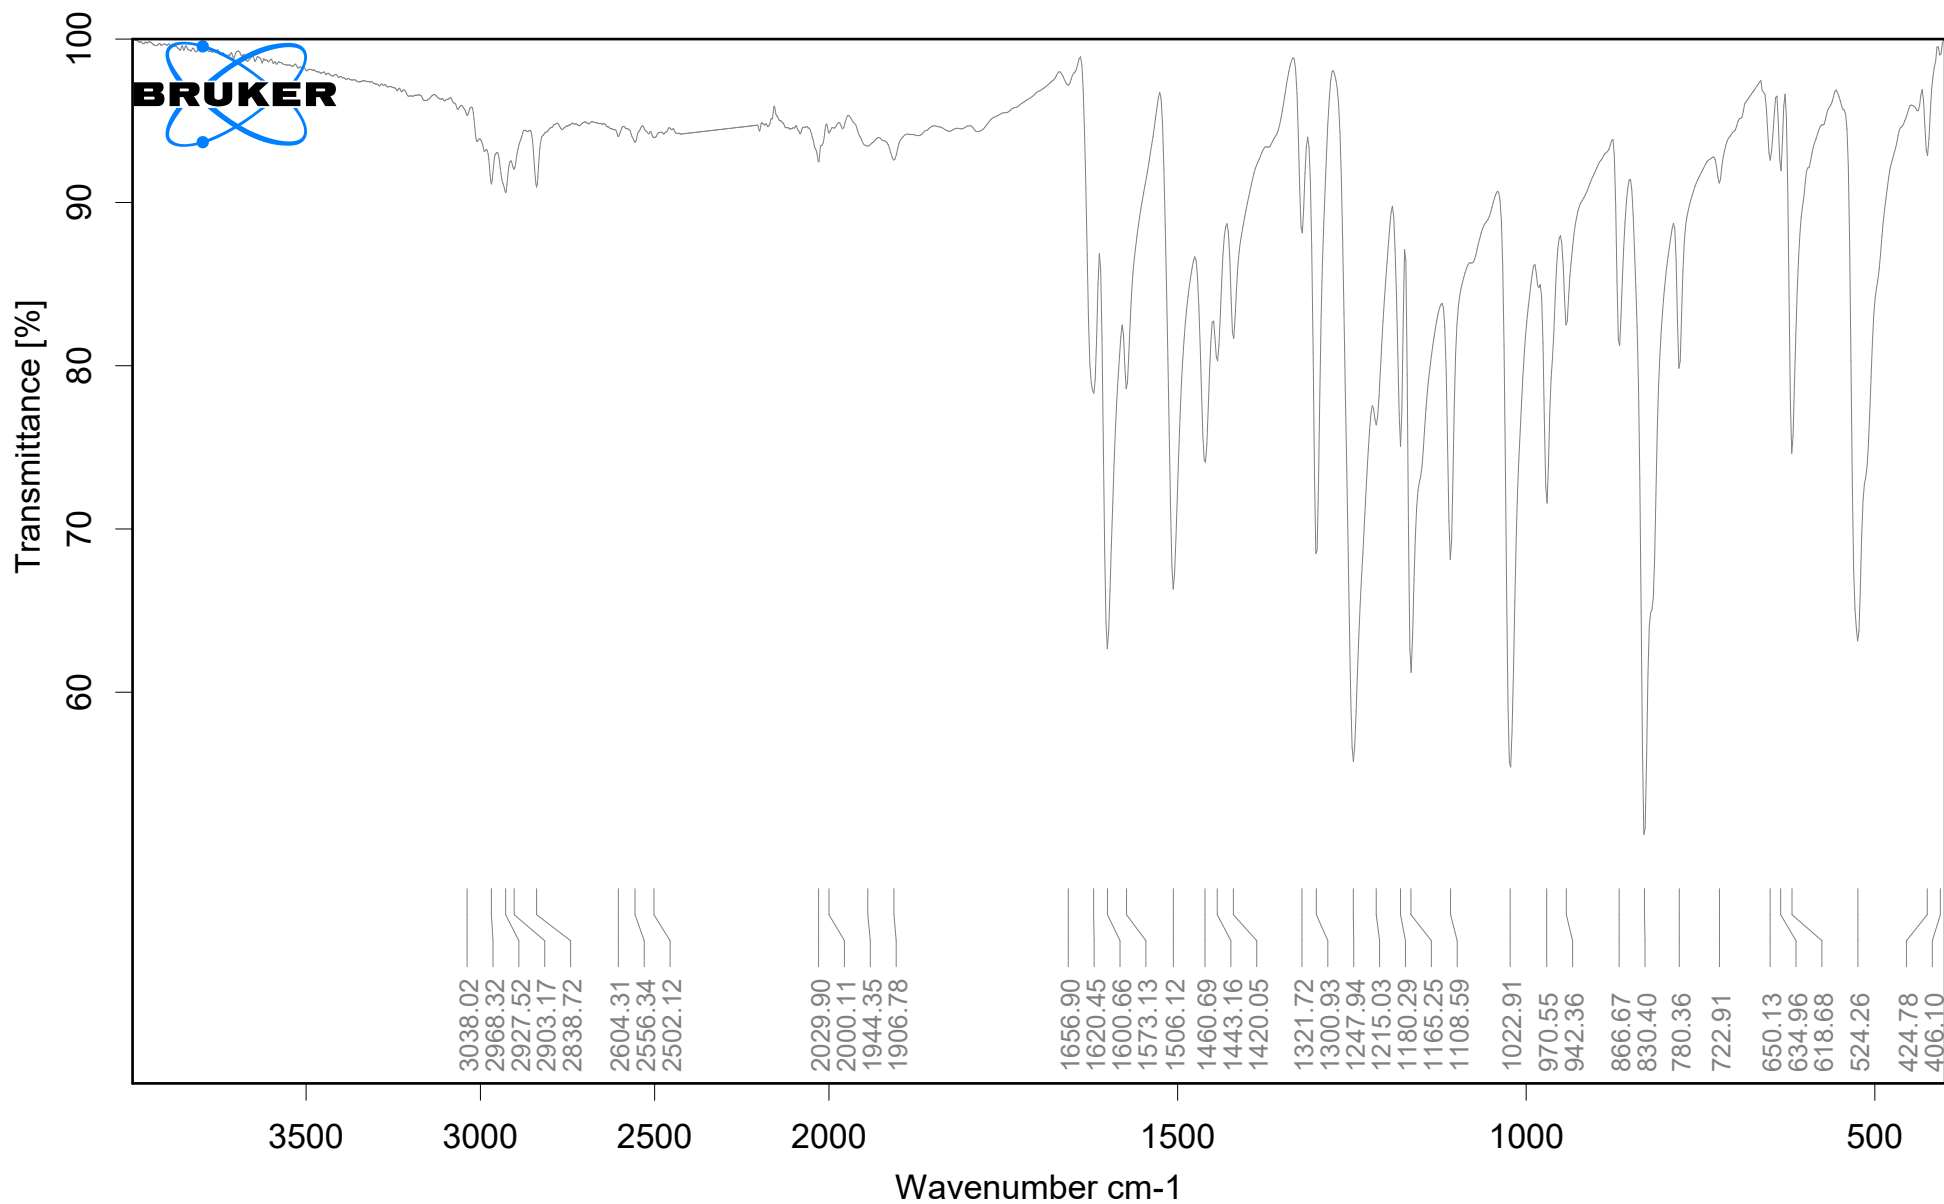

Supplement: Supplementary file 44 [file supplementary]

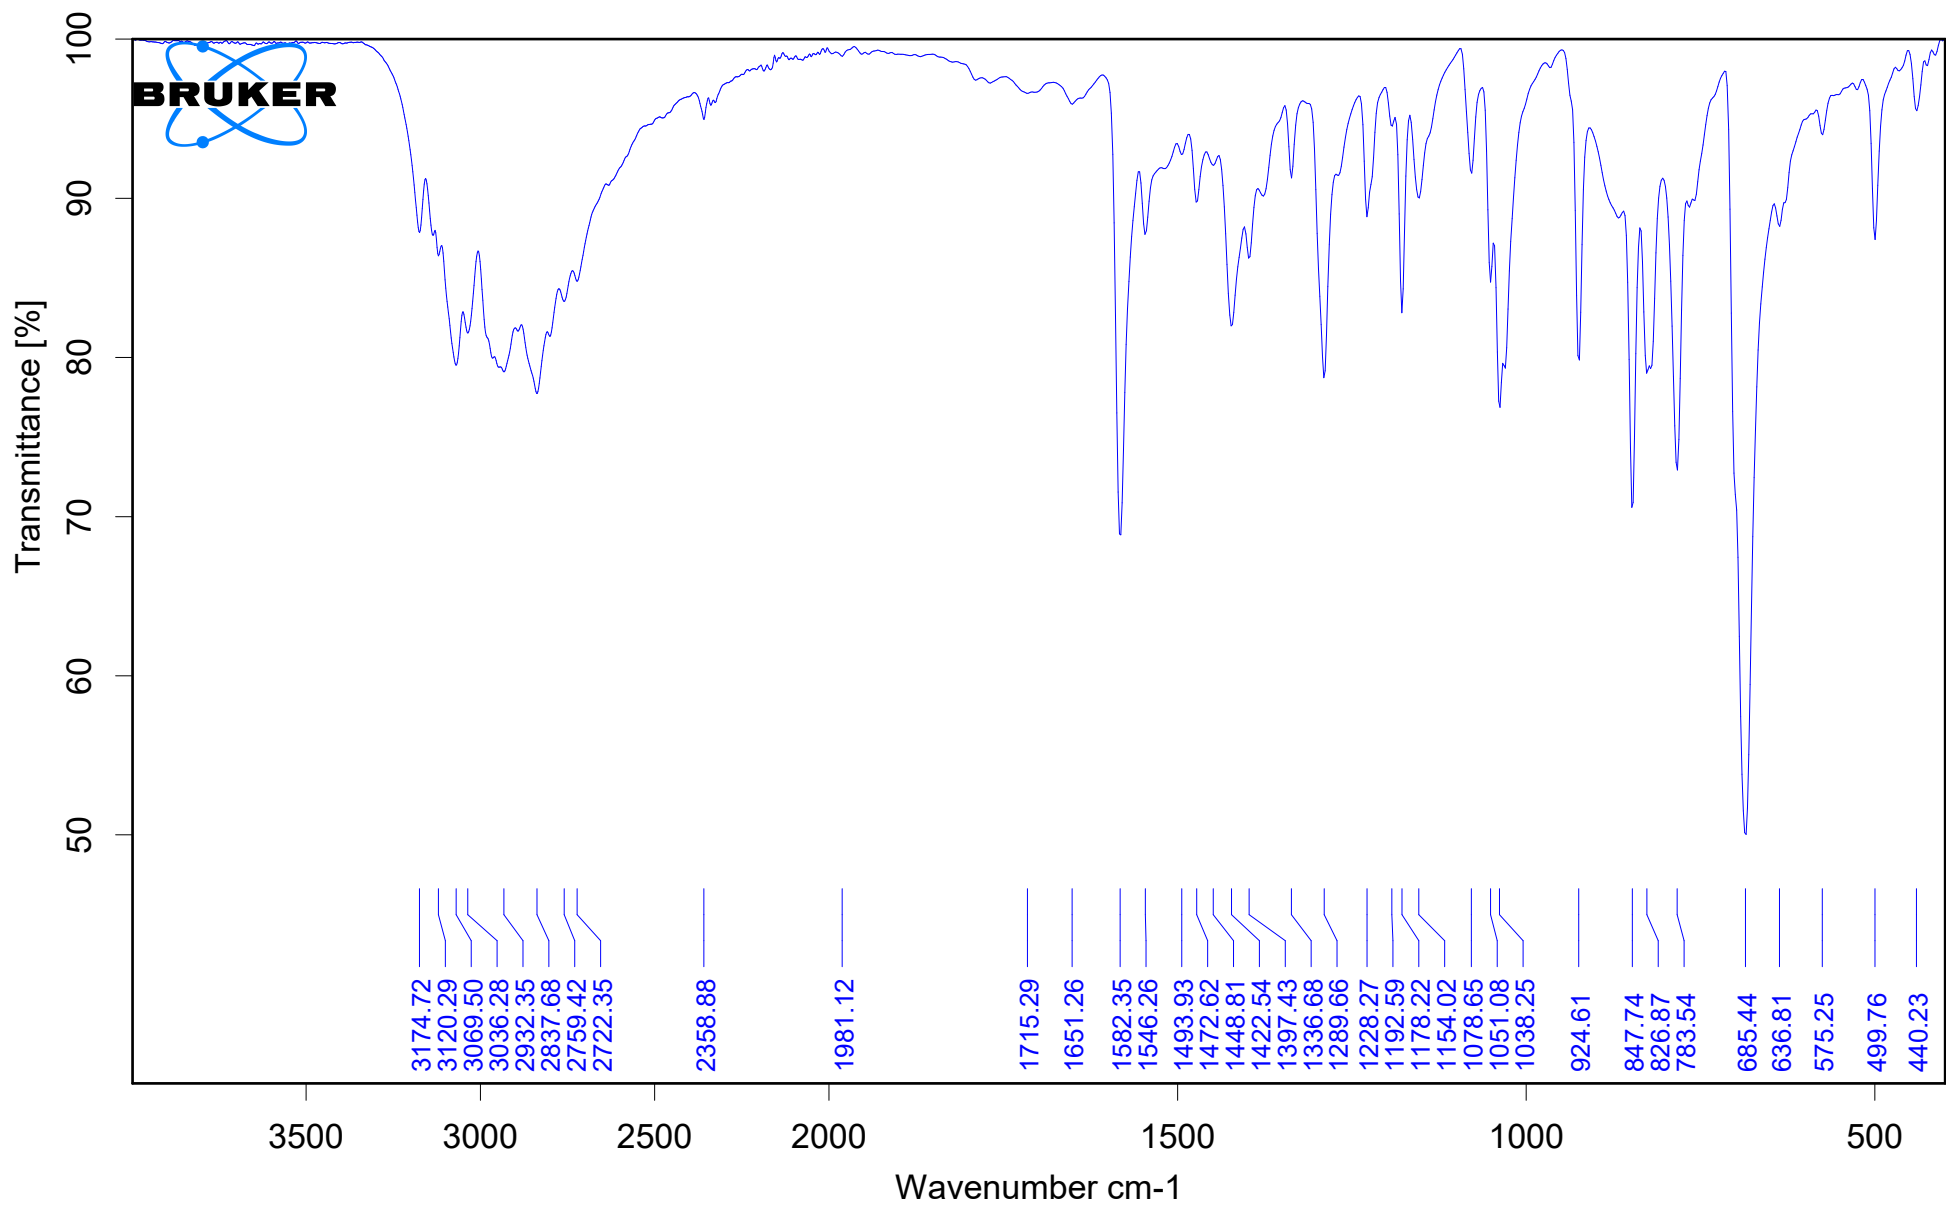

Supplement: Supplementary file 70 [file supplementary]

41-DMSO-13C-5.jdf  
SALWAAN/41-DMSO-13C

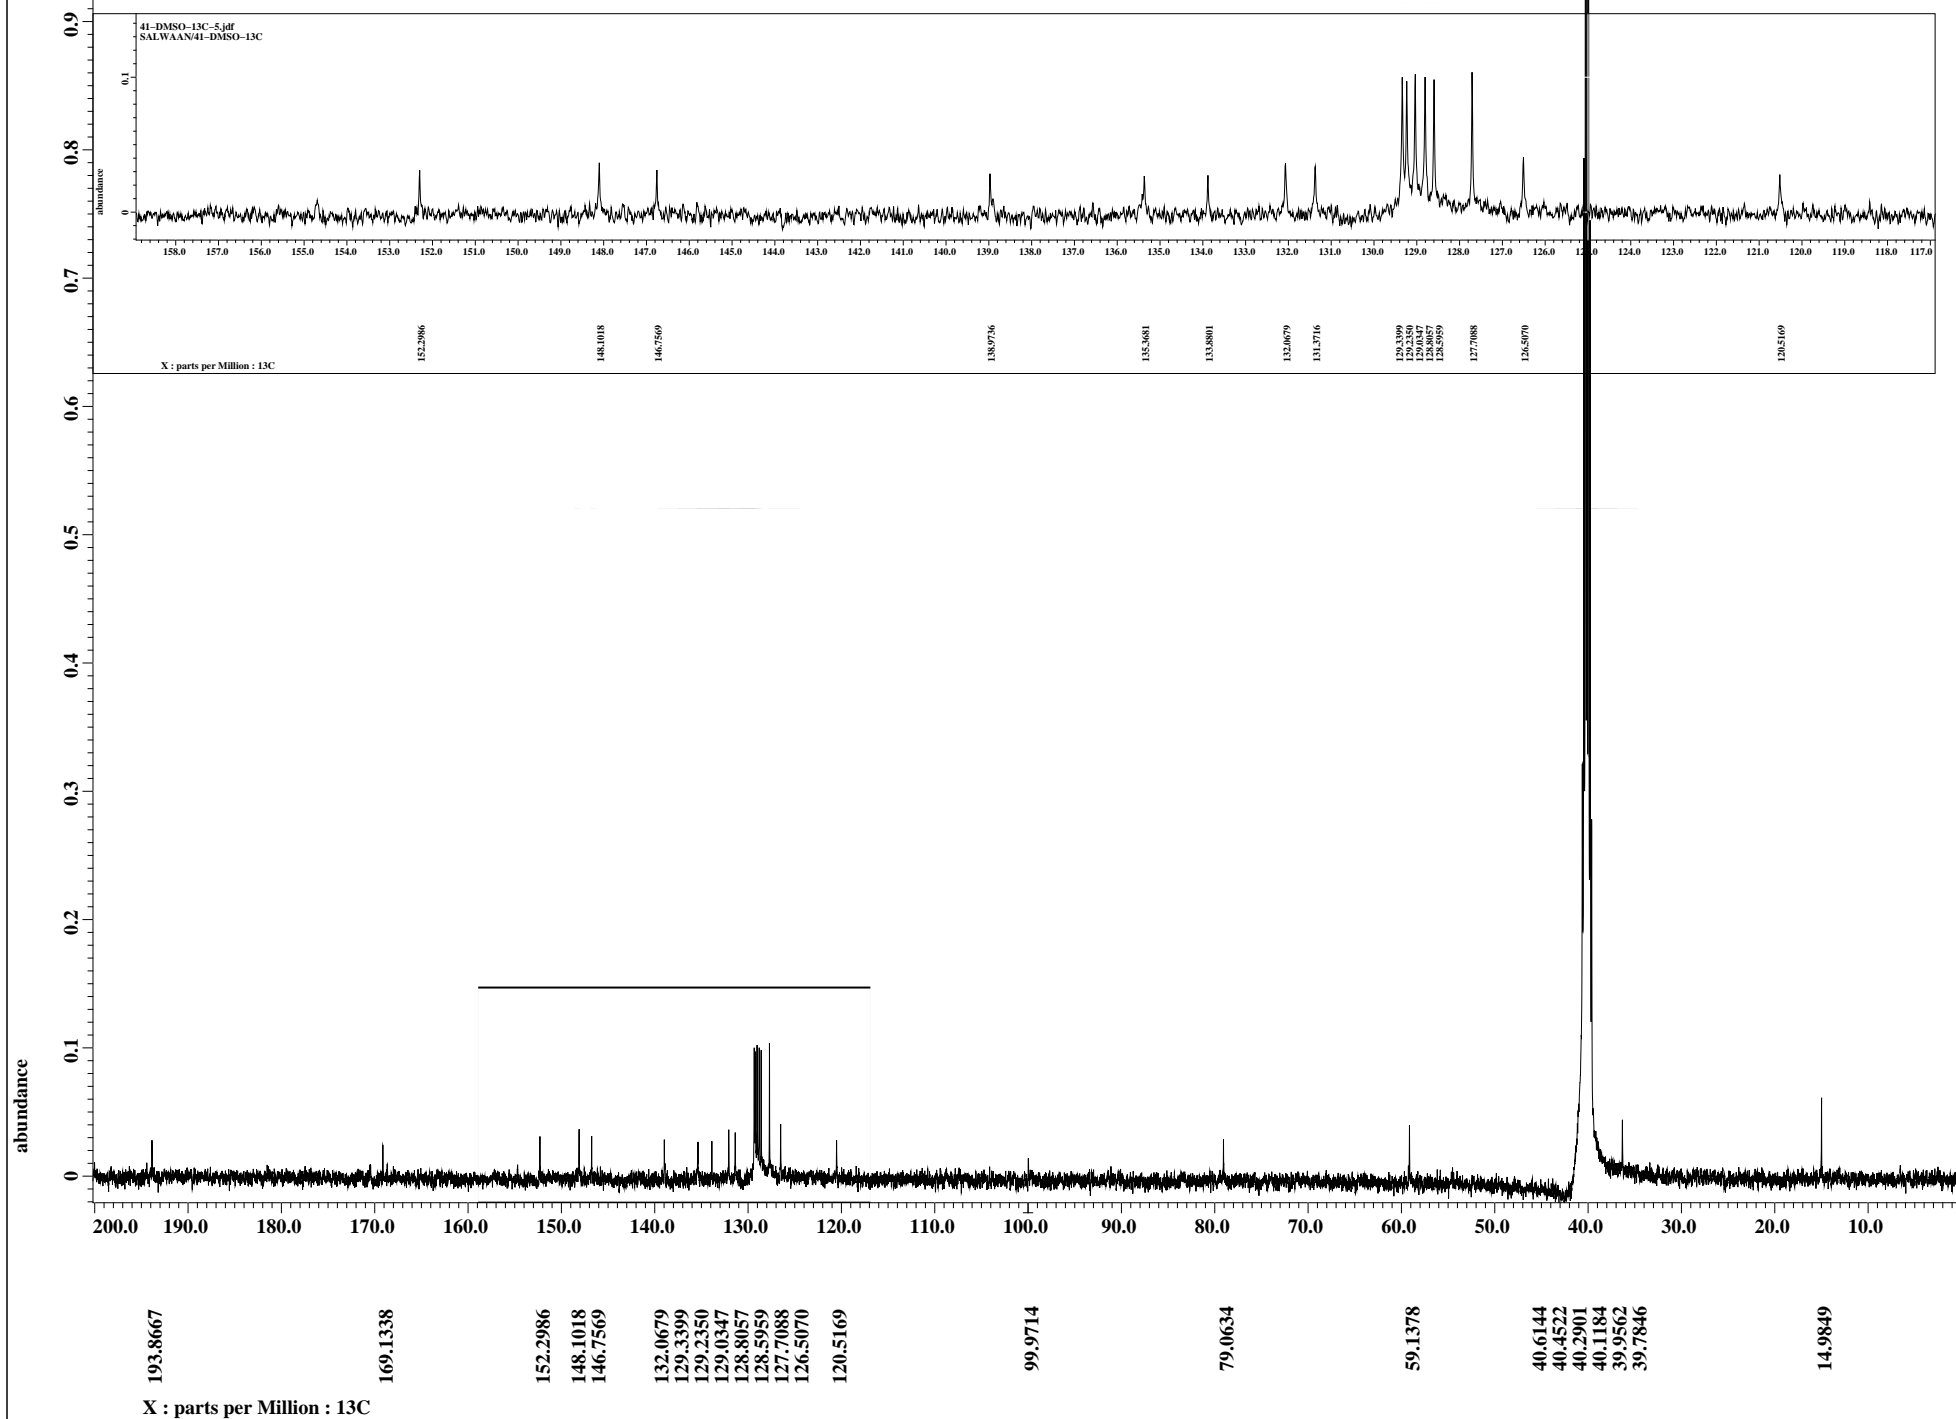

Supplement: Supplementary file 76 [file supplementary]

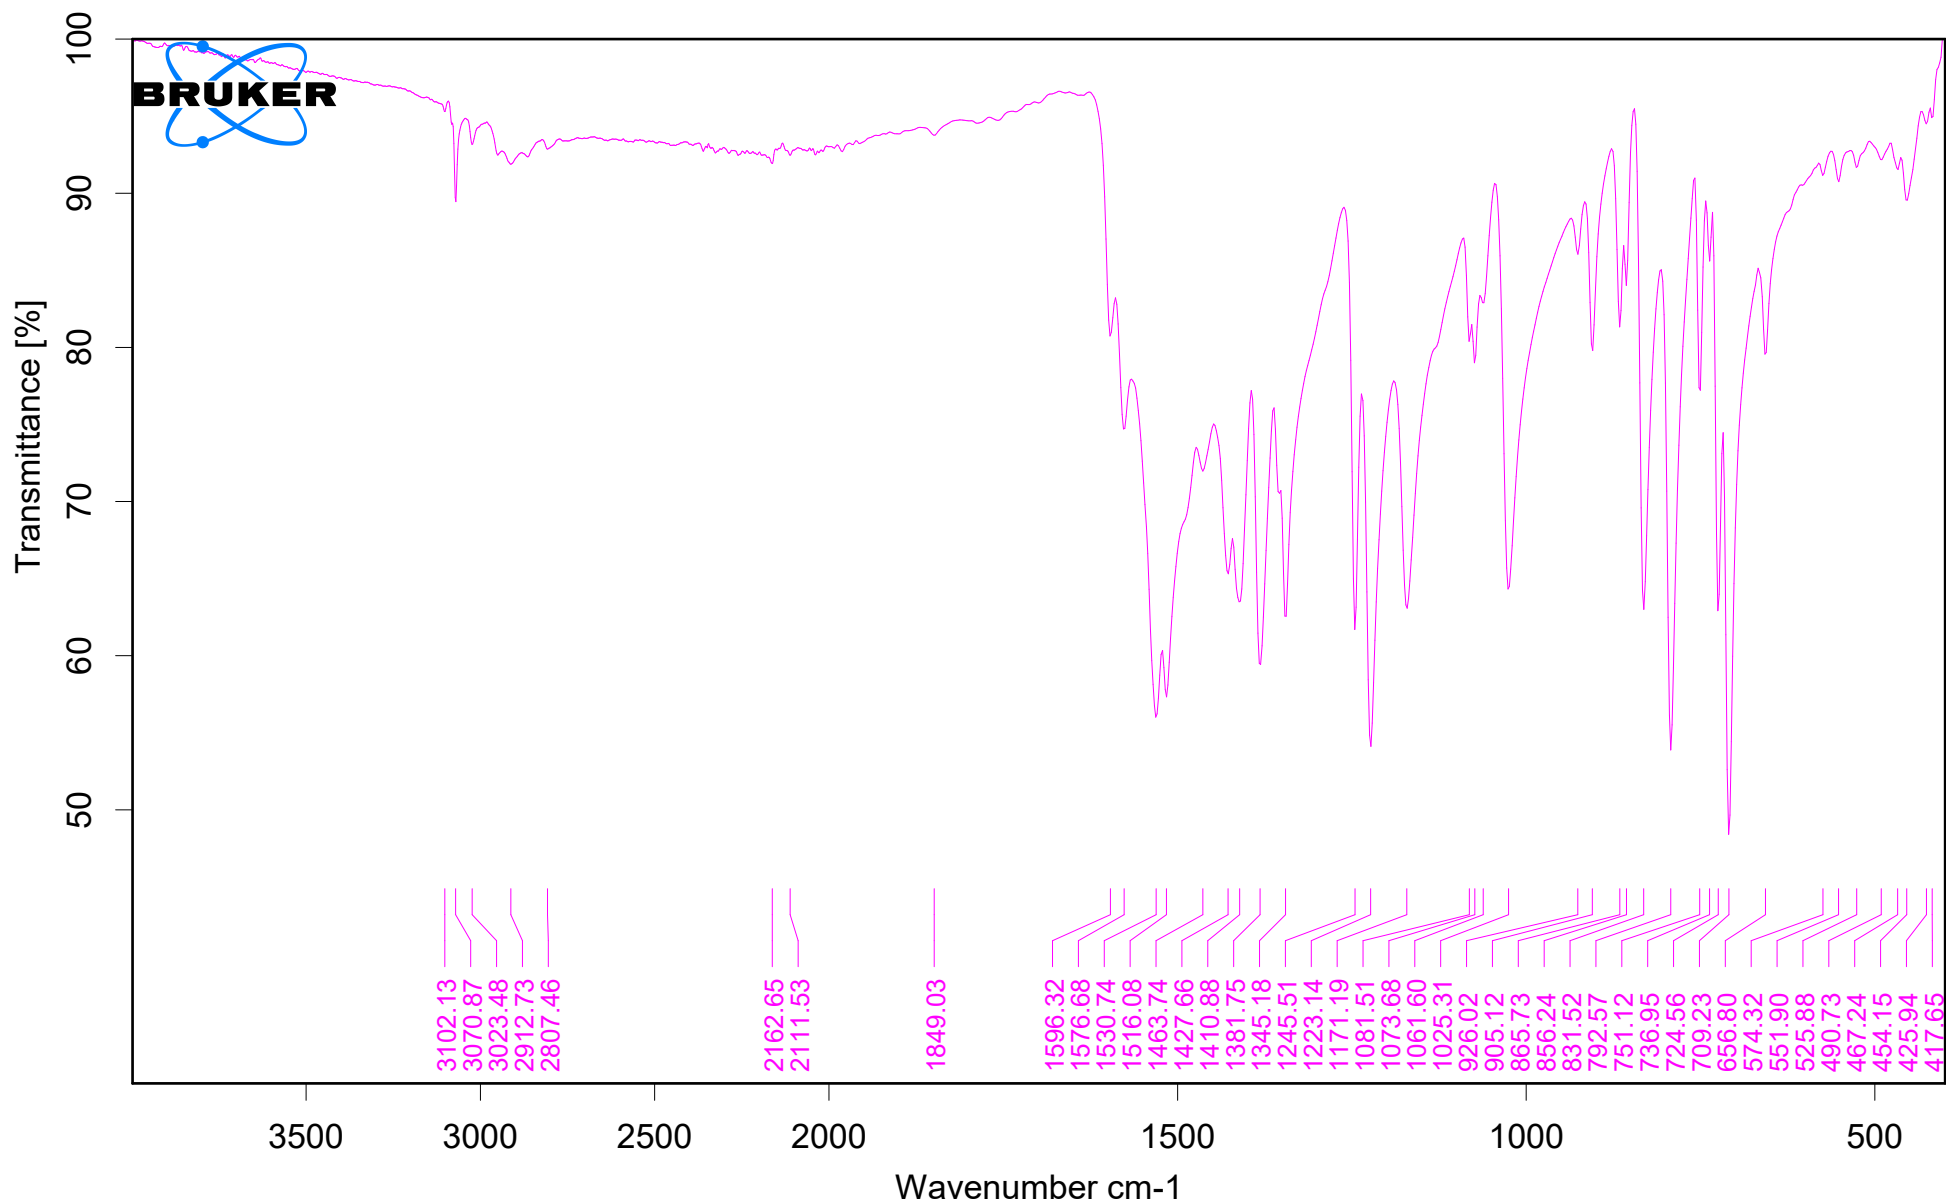

D:\Selwan\8-2-2022\60.0

60

Sample

08/02/2022

Supplement: Supplementary file 84 [file supplementary]

Salwan-42A-DMSO-C63  
Salwan-42A-DMSO-C63

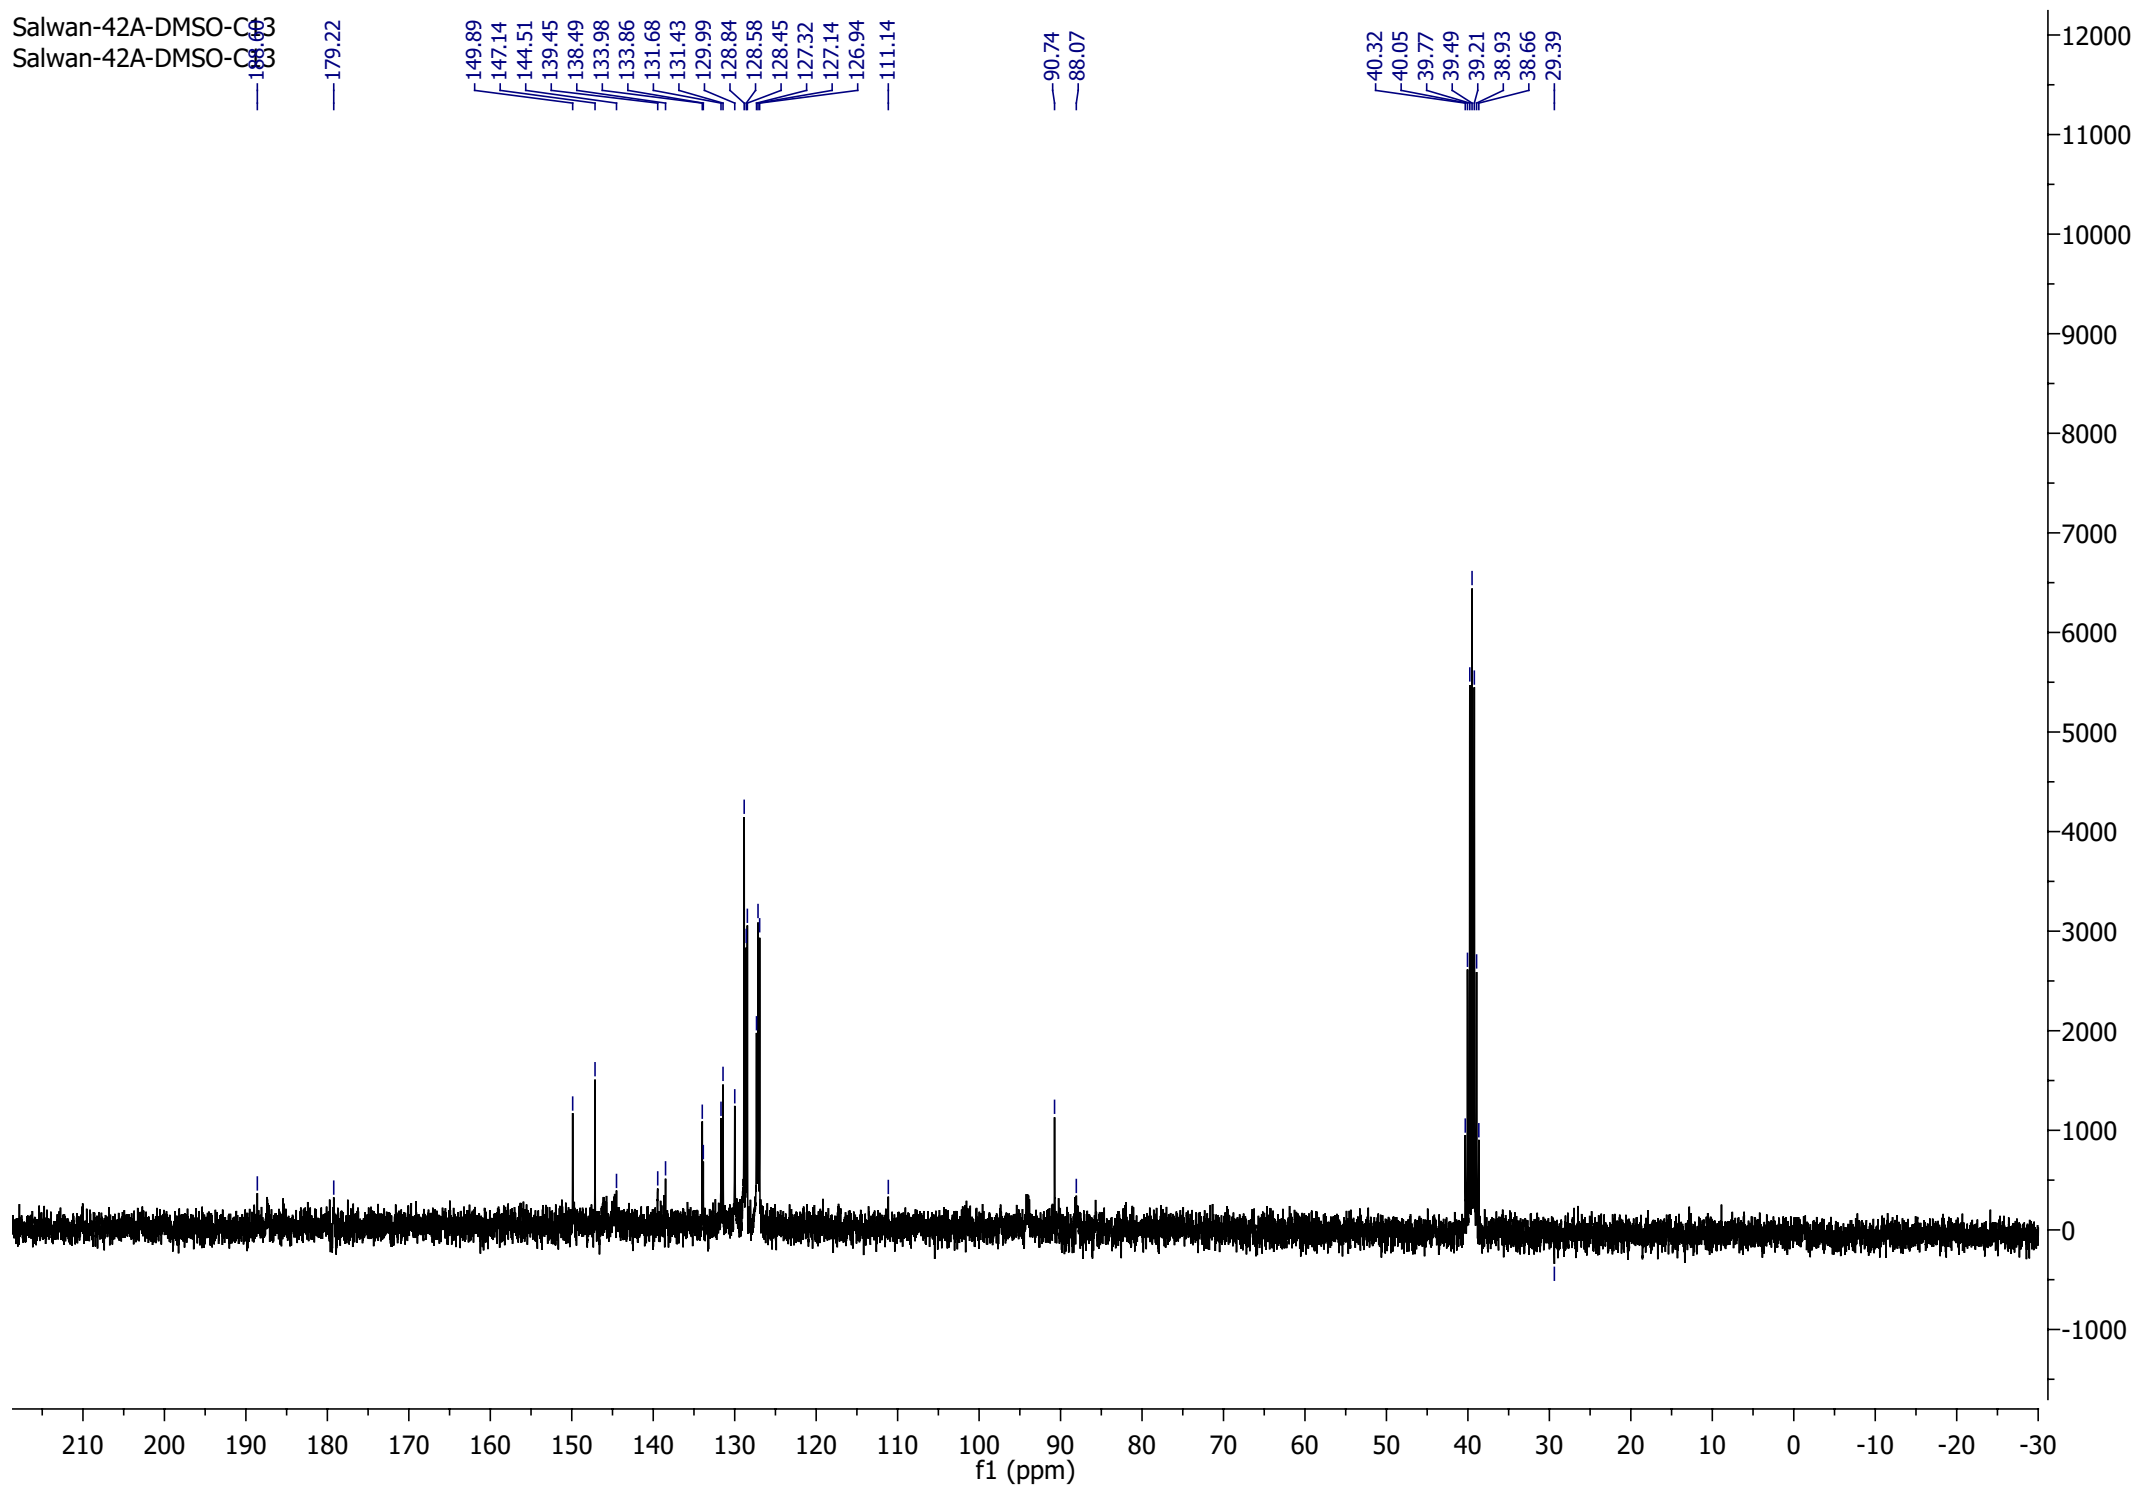

Supplement: Supplementary file 87 [file supplementary]

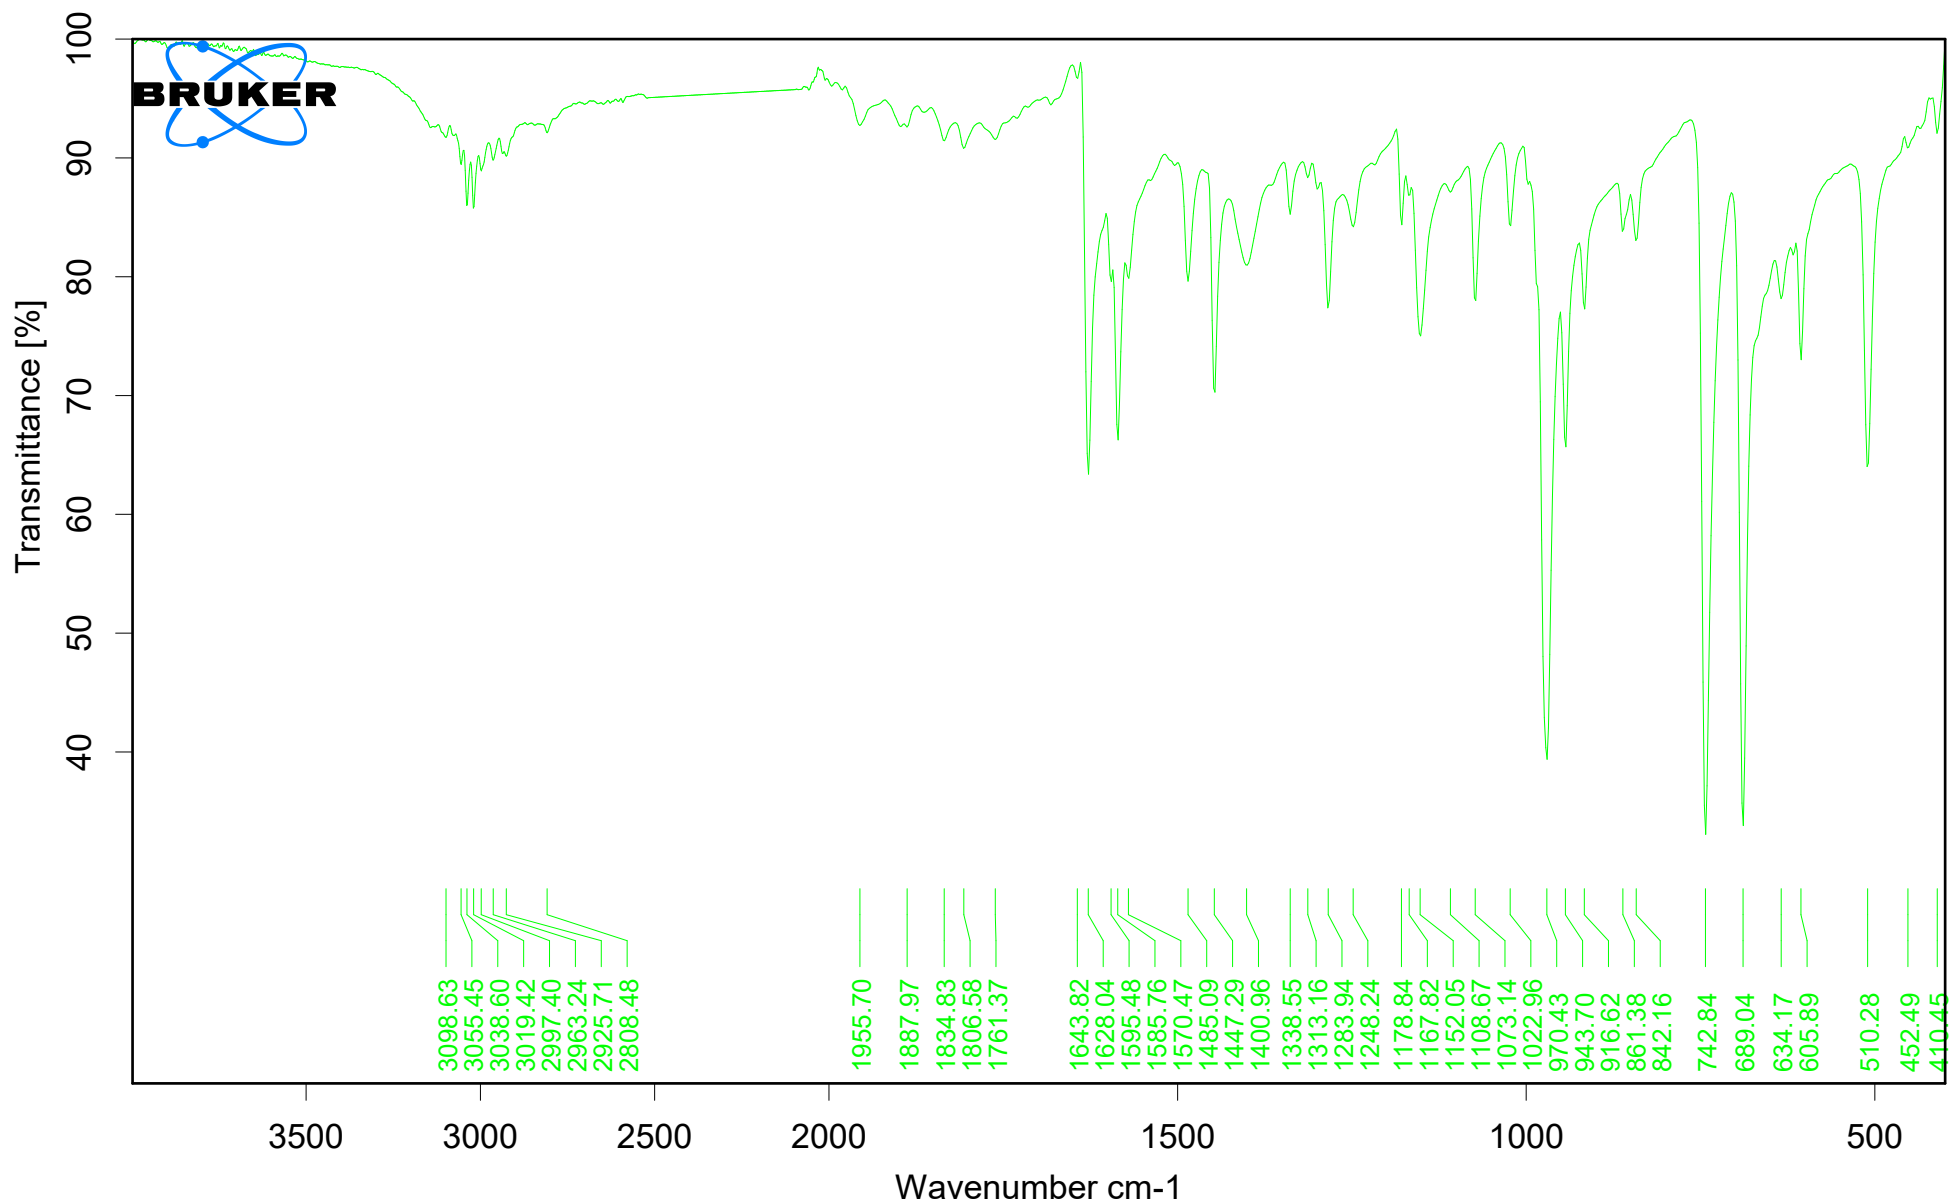

D:\Hiam abdelrahman 2022\11-1-2023\130.0

130

Sample

11/01/2023

Supplement: Supplementary file 88 [file supplementary]

Salwan-110B-DMSO-C13  
Salwan-110B-DMSO-C13

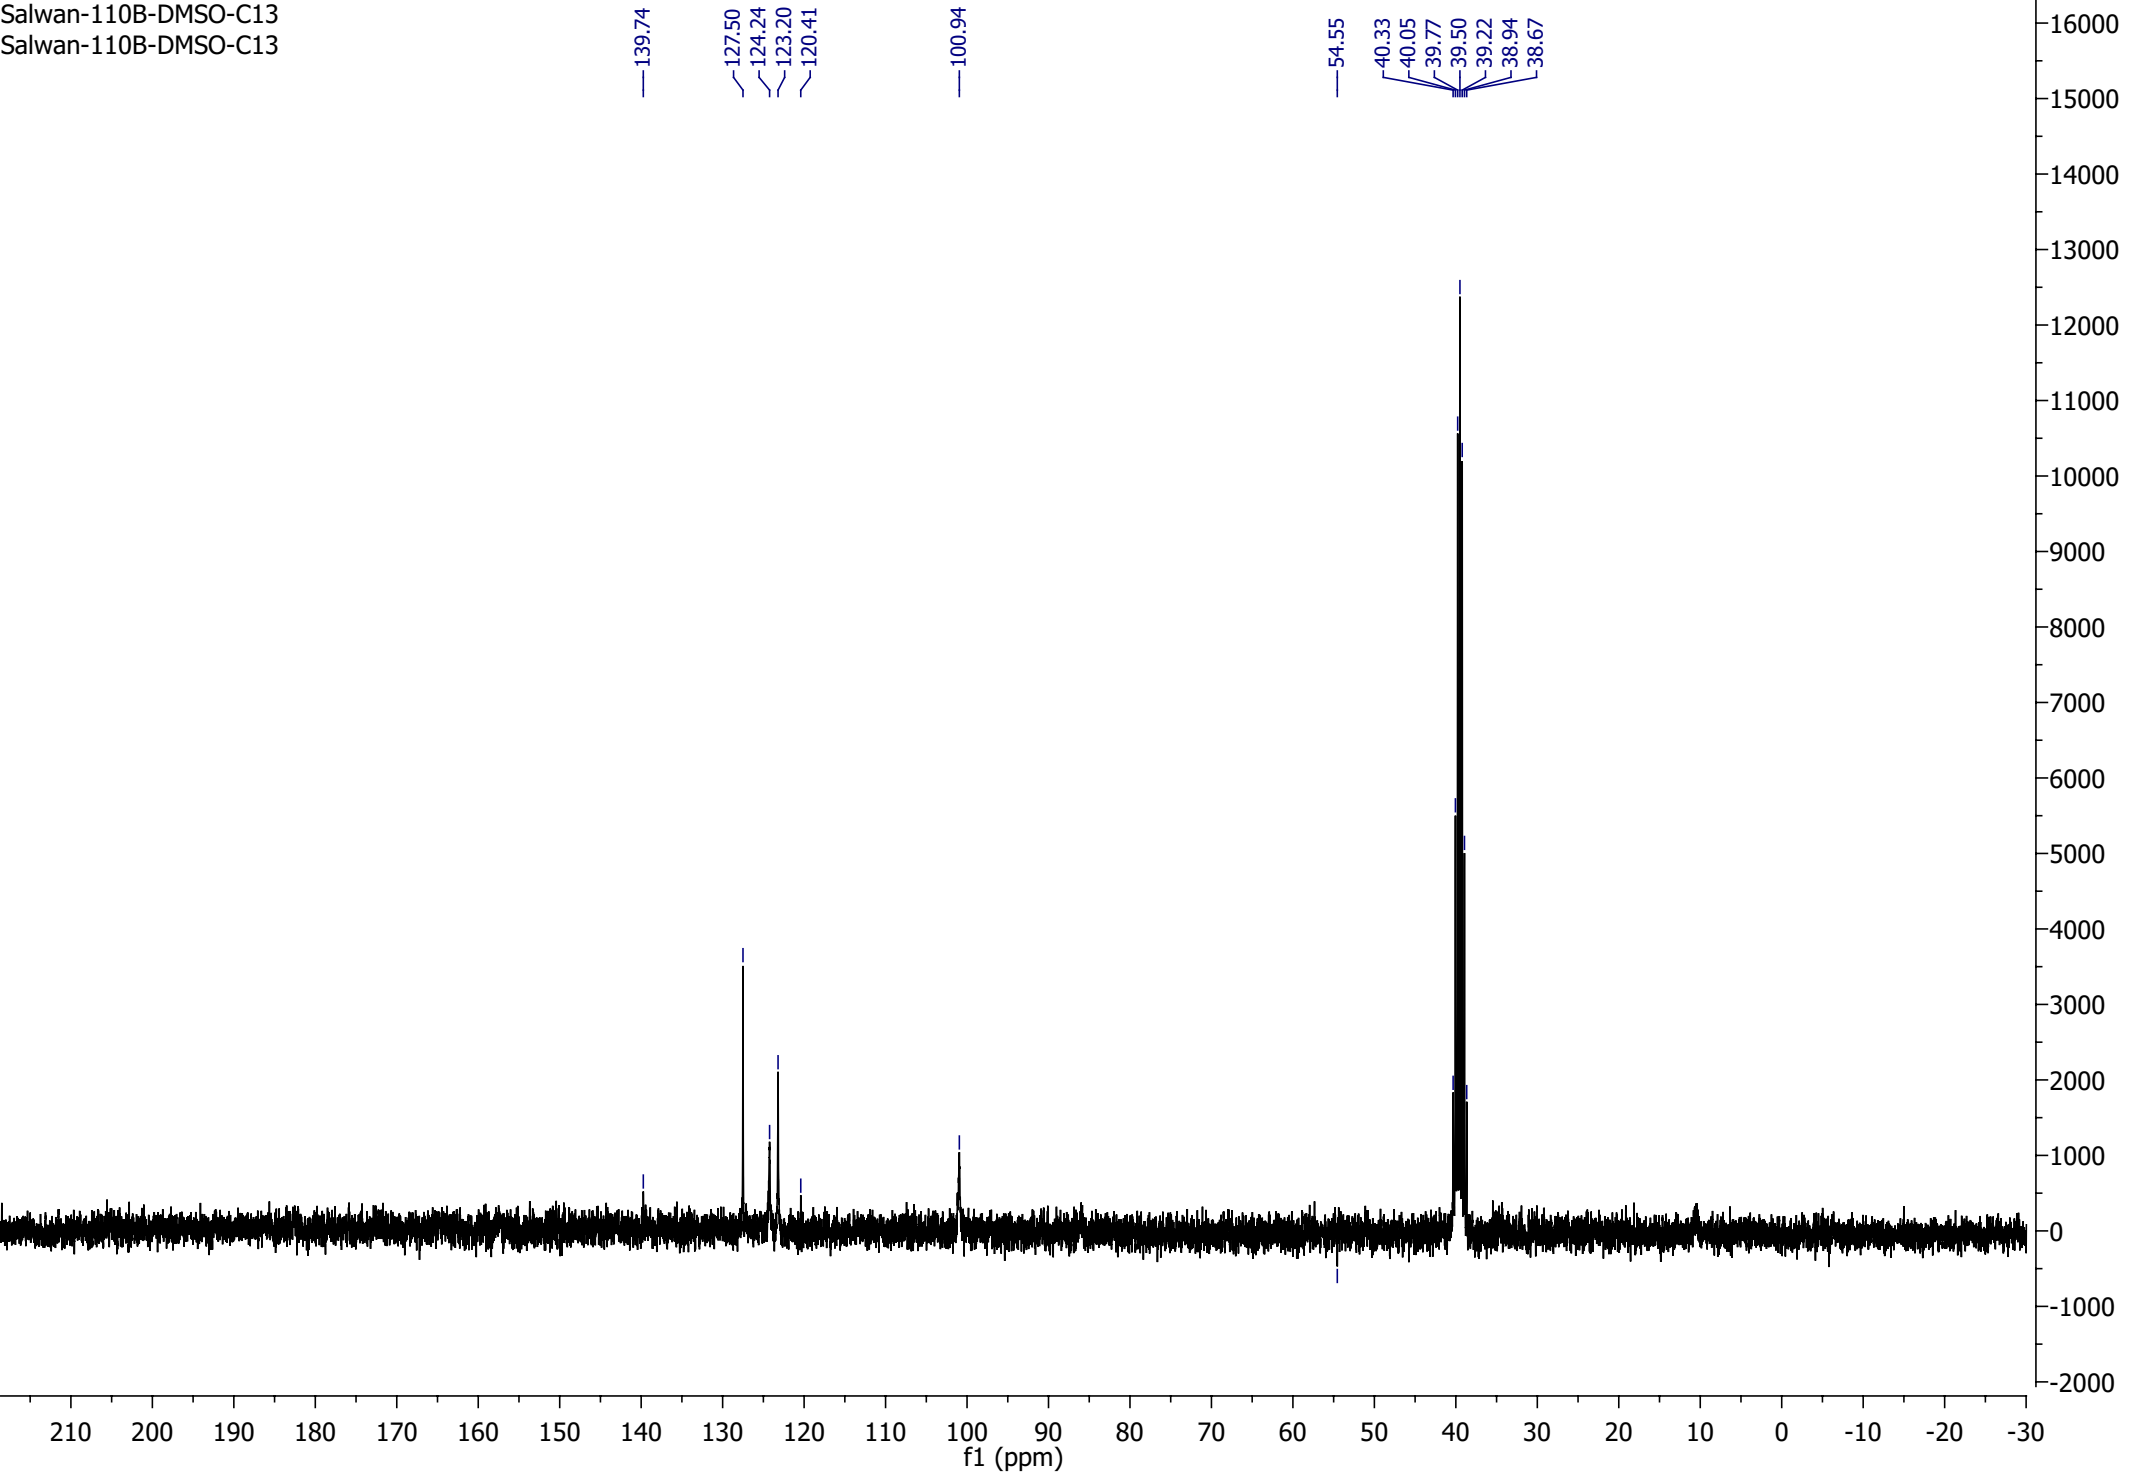

Supplement: Supplementary file 93 [file supplementary]

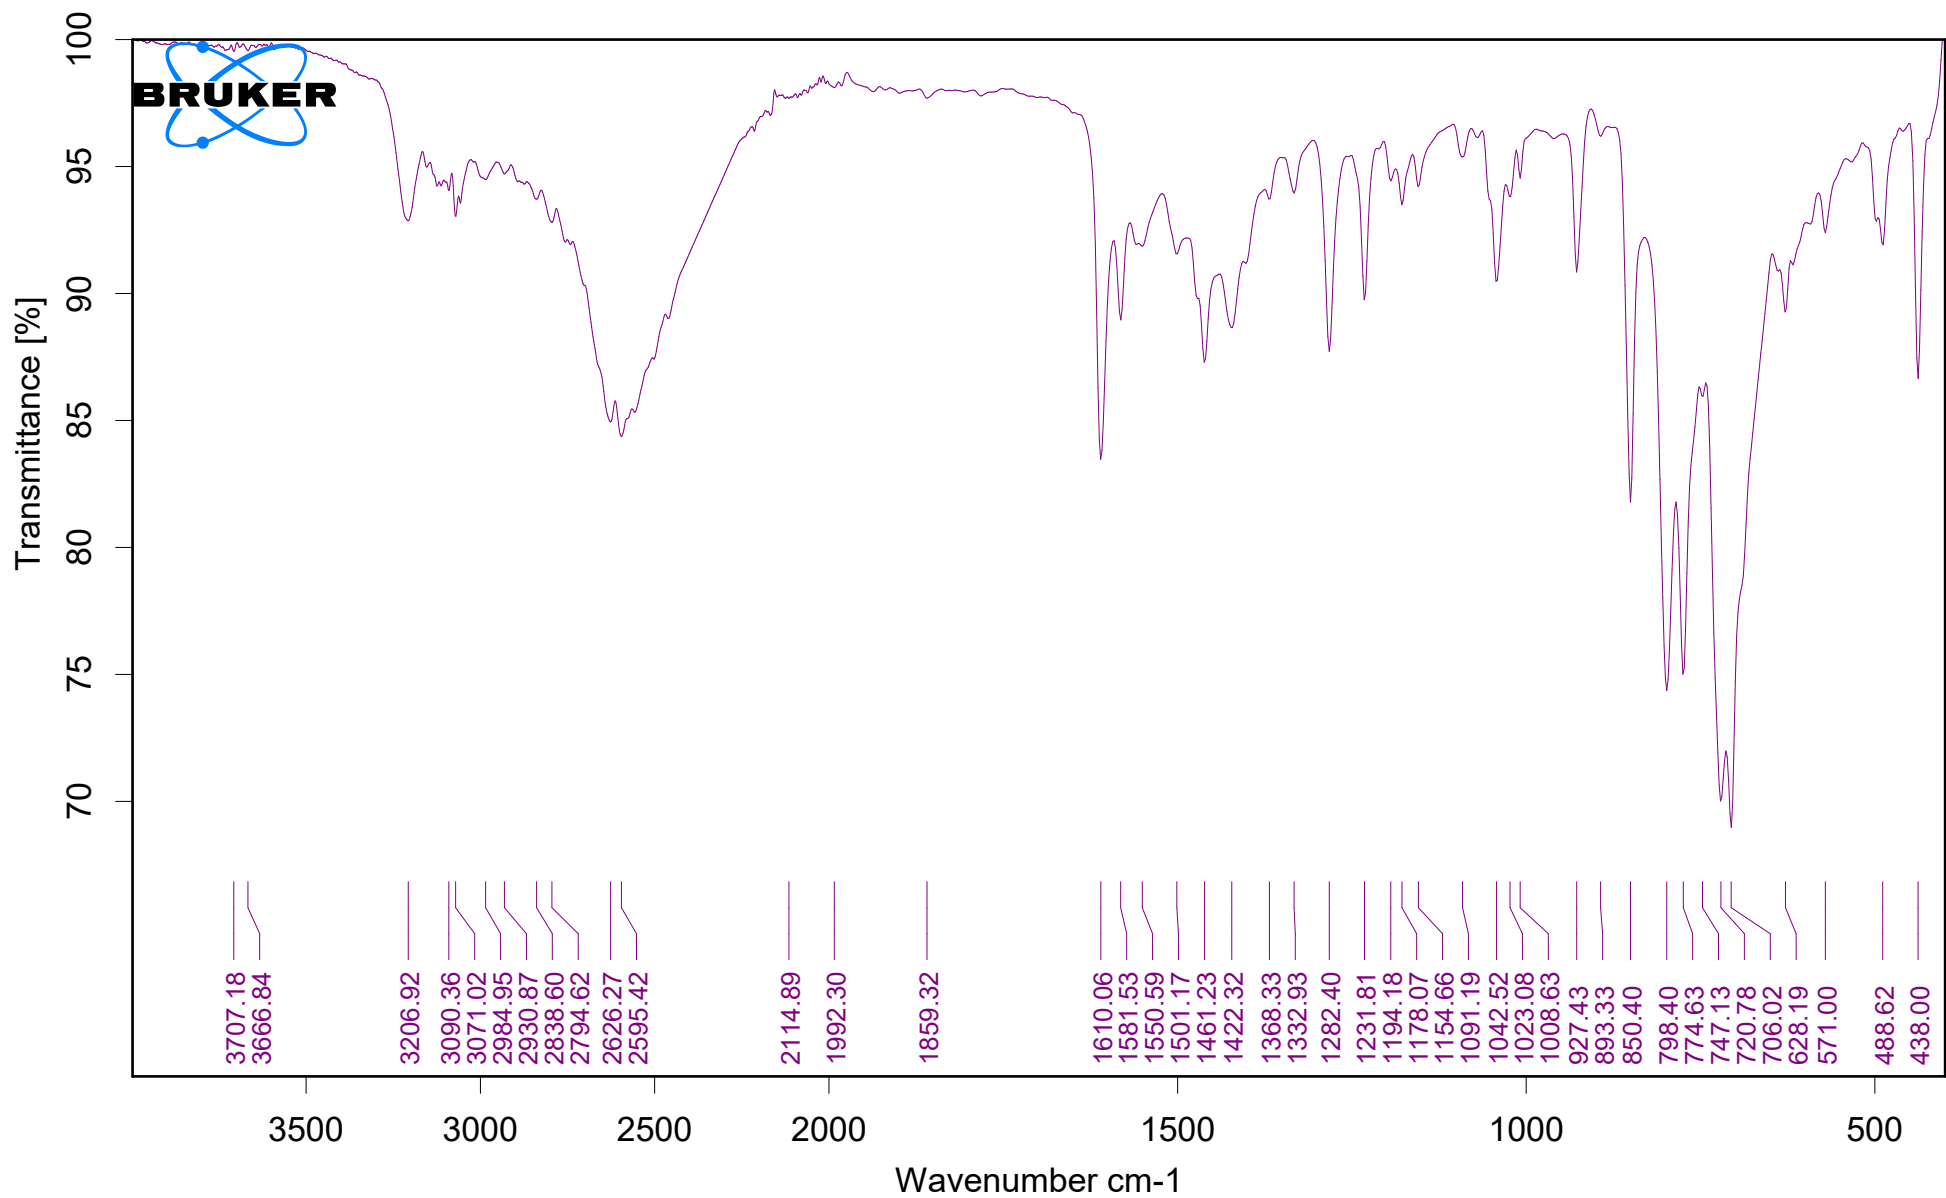

D:\Selwan\8-2-2022\53A.0

53A

Sample

08/02/2022

Supplement: Supplementary file 99 [file supplementary]
